# Supplementary material
Source: publisher figshare collection journal article supplement (https://acs.figshare.com/ndownloader/files/3744553)
Supplement: Supplementary file 1 [file 3744553]

data_AT356_a
_publcif_datablock.id '{dcc85ecf-add0-48b4-941a-f9bf566ebe4c}'
loop_
_publcif_info_datablock.id
_publcif_info_datablock.publ_exptl
_publcif_info_datablock.publ_geom
_publcif_info_datablock.structure
'{dcc85ecf-add0-48b4-941a-f9bf566ebe4c}' y y y

_audit_update_record
;
2014-09-15 # Formatted by publCIF

;

# publcif _publ_body_element loop start
loop_
_publ_body_element
_publ_body_title
_publ_body_contents

 section 
;
Introduction
; 
;

;
 section 
;
Experimental
; 
;

;
 subsection 
;
Synthesis and crystallization
; 
;

;
 subsection 
;
Refinement
;
;
Crystal data, data collection and structure refinement details are summarized
in Table 1.
;

 section 
;
Results and discussion
; 
;

;
# publcif _publ_body_element loop end
 
_audit_creation_method            SHELXL-2014
_chemical_name_systematic
?
_chemical_name_common             ?
_chemical_melting_point           ?
_chemical_formula_moiety          'C27 H62 Ge2 O Si7'
_chemical_formula_sum
 'C27 H62 Ge2 O Si7' 
_chemical_formula_weight          744.57

loop_
 _atom_type_symbol
 _atom_type_description
 _atom_type_scat_dispersion_real
 _atom_type_scat_dispersion_imag
 _atom_type_scat_source
 'C'  'C'   0.0033   0.0016
 'International Tables Vol C Tables 4.2.6.8 and 6.1.1.4'
 'H'  'H'   0.0000   0.0000
 'International Tables Vol C Tables 4.2.6.8 and 6.1.1.4'
 'Ge'  'Ge'   0.1547   1.8001
 'International Tables Vol C Tables 4.2.6.8 and 6.1.1.4'
 'O'  'O'   0.0106   0.0060
 'International Tables Vol C Tables 4.2.6.8 and 6.1.1.4'
 'Si'  'Si'   0.0817   0.0704
 'International Tables Vol C Tables 4.2.6.8 and 6.1.1.4'
 
_space_group_crystal_system       monoclinic
_space_group_IT_number            14
_space_group_name_H-M_alt         'P 21/n'
_space_group_name_Hall            '-P 2yn'
 
_shelx_space_group_comment
;
The symmetry employed for this shelxl refinement is uniquely defined
by the following loop, which should always be used as a source of
symmetry information in preference to the above space-group names.
They are only intended as comments.
;
 
loop_
 _space_group_symop_operation_xyz
 'x, y, z'
 '-x+1/2, y+1/2, -z+1/2'
 '-x, -y, -z'
 'x-1/2, -y-1/2, z-1/2'
 
_cell_length_a                    18.786(3)
_cell_length_b                    9.4192(12)
_cell_length_c                    24.162(3)
_cell_angle_alpha                 90
_cell_angle_beta                  107.504(6)
_cell_angle_gamma                 90
_cell_volume                      4077.5(9)
_cell_formula_units_Z             4
_cell_measurement_temperature     103(2)
_cell_measurement_reflns_used      9724
_cell_measurement_theta_min        2.27
_cell_measurement_theta_max       27.18
_exptl_crystal_description       'plate'
_exptl_crystal_colour            'colourless'
_exptl_crystal_density_meas       ? 
_exptl_crystal_density_method     ?              
_exptl_crystal_density_diffrn     1.213          
_exptl_crystal_F_000              1576
_exptl_transmission_factor_min    ?                                             
_exptl_transmission_factor_max    ?                                             
_exptl_crystal_size_max           0.150
_exptl_crystal_size_mid           0.030
_exptl_crystal_size_min           0.014
_exptl_absorpt_coefficient_mu     1.698
_shelx_estimated_absorpt_T_min    0.785
_shelx_estimated_absorpt_T_max    0.977
_exptl_absorpt_correction_type    multi-scan 
_exptl_absorpt_correction_T_min   0.652 
_exptl_absorpt_correction_T_max   0.741 
_exptl_absorpt_process_details    SADABS 
 
_exptl_special_details
?
 
_diffrn_ambient_temperature       103(2)
_diffrn_radiation_wavelength      0.71073
_diffrn_radiation_type           MoK\a
_diffrn_radiation_source         'sealed tube'
_diffrn_radiation_monochromator  'graphite'
_diffrn_measurement_device_type  'Bruker APEX-II CCD'
_diffrn_measurement_method       '\f and \w scans'
_diffrn_detector_area_resol_mean  ? 
_diffrn_reflns_number             81637
_diffrn_reflns_av_unetI/netI      0.0336
_diffrn_reflns_av_R_equivalents   0.0516
_diffrn_reflns_limit_h_min        -24
_diffrn_reflns_limit_h_max        24
_diffrn_reflns_limit_k_min        -12
_diffrn_reflns_limit_k_max        12
_diffrn_reflns_limit_l_min        -30
_diffrn_reflns_limit_l_max        31
_diffrn_reflns_theta_min          2.274
_diffrn_reflns_theta_max          27.226
_diffrn_reflns_theta_full         25.242
_diffrn_measured_fraction_theta_max   0.991
_diffrn_measured_fraction_theta_full  0.999
_diffrn_reflns_Laue_measured_fraction_max    0.991
_diffrn_reflns_Laue_measured_fraction_full   0.999
_diffrn_reflns_point_group_measured_fraction_max   0.991
_diffrn_reflns_point_group_measured_fraction_full  0.999
_reflns_number_total              9026
_reflns_number_gt                 7346
_reflns_threshold_expression      'I > 2\s(I)'
_reflns_Friedel_coverage          0.000
_reflns_Friedel_fraction_max      .
_reflns_Friedel_fraction_full     .
 
_reflns_special_details
;
 Reflections were merged by SHELXL according to the crystal
 class for the calculation of statistics and refinement.
 
 _reflns_Friedel_fraction is defined as the number of unique
 Friedel pairs measured divided by the number that would be
 possible theoretically, ignoring centric projections and
 systematic absences.
;
 
_computing_data_collection       'Bruker APEX2'
_computing_cell_refinement       'Bruker SAINT'
_computing_data_reduction        'Bruker SAINT'
_computing_structure_solution    'SHELXS-97 (Sheldrick 2008)'
_computing_structure_refinement  'SHELXL-2014 (Sheldrick 2014)'
_computing_molecular_graphics    'Bruker SHELXTL'
_computing_publication_material  'Bruker SHELXTL'
 
_refine_special_details
?
_refine_ls_structure_factor_coef  Fsqd
_refine_ls_matrix_type            full
_refine_ls_weighting_scheme       calc
_refine_ls_weighting_details
'w=1/[\s^2^(Fo^2^)+(0.0256P)^2^+1.3160P] where P=(Fo^2^+2Fc^2^)/3'
_atom_sites_solution_primary      ?
_atom_sites_solution_secondary    ?
_atom_sites_solution_hydrogens    geom
_refine_ls_hydrogen_treatment     constr
_refine_ls_extinction_method      none
_refine_ls_extinction_coef        .
_refine_ls_number_reflns          9026
_refine_ls_number_parameters      354
_refine_ls_number_restraints      0
_refine_ls_R_factor_all           0.0407
_refine_ls_R_factor_gt            0.0262
_refine_ls_wR_factor_ref          0.0576
_refine_ls_wR_factor_gt           0.0533
_refine_ls_goodness_of_fit_ref    1.001
_refine_ls_restrained_S_all       1.001
_refine_ls_shift/su_max           0.001
_refine_ls_shift/su_mean          0.000
 
loop_
 _atom_site_label
 _atom_site_type_symbol
 _atom_site_fract_x
 _atom_site_fract_y
 _atom_site_fract_z
 _atom_site_U_iso_or_equiv
 _atom_site_adp_type
 _atom_site_occupancy
 _atom_site_site_symmetry_order  
 _atom_site_calc_flag
 _atom_site_refinement_flags_posn
 _atom_site_refinement_flags_adp
 _atom_site_refinement_flags_occupancy
 _atom_site_disorder_assembly
 _atom_site_disorder_group
C1 C 0.21513(10) 0.13884(18) 0.64444(7) 0.0158(4) Uani 1 1 d . . . . .
C2 C 0.13153(10) 0.14771(18) 0.63304(7) 0.0161(4) Uani 1 1 d . . . . .
C3 C 0.09925(10) 0.26313(18) 0.65332(8) 0.0180(4) Uani 1 1 d . . . . .
C4 C 0.02213(10) 0.2664(2) 0.64237(8) 0.0216(4) Uani 1 1 d . . . . .
H4 H 0.0003 0.3441 0.6564 0.026 Uiso 1 1 calc R U . . .
C5 C -0.02377(10) 0.1596(2) 0.61163(8) 0.0238(4) Uani 1 1 d . . . . .
C6 C 0.00942(10) 0.0467(2) 0.59191(8) 0.0236(4) Uani 1 1 d . . . . .
H6 H -0.0214 -0.0269 0.5705 0.028 Uiso 1 1 calc R U . . .
C7 C 0.08627(10) 0.03757(19) 0.60237(8) 0.0190(4) Uani 1 1 d . . . . .
C8 C 0.14606(10) 0.38125(19) 0.68812(8) 0.0212(4) Uani 1 1 d . . . . .
H8A H 0.1143 0.4638 0.6881 0.032 Uiso 1 1 calc R U . . .
H8B H 0.1851 0.4075 0.6707 0.032 Uiso 1 1 calc R U . . .
H8C H 0.1692 0.3492 0.7281 0.032 Uiso 1 1 calc R U . . .
C9 C -0.10729(11) 0.1648(2) 0.60031(10) 0.0353(5) Uani 1 1 d . . . . .
H9A H -0.1193 0.2334 0.6266 0.053 Uiso 1 1 calc R U . . .
H9B H -0.1254 0.0706 0.6069 0.053 Uiso 1 1 calc R U . . .
H9C H -0.1314 0.1937 0.5600 0.053 Uiso 1 1 calc R U . . .
C10 C 0.11794(11) -0.0897(2) 0.57996(9) 0.0277(5) Uani 1 1 d . . . . .
H10A H 0.0772 -0.1530 0.5594 0.042 Uiso 1 1 calc R U . . .
H10B H 0.1521 -0.1406 0.6126 0.042 Uiso 1 1 calc R U . . .
H10C H 0.1451 -0.0580 0.5533 0.042 Uiso 1 1 calc R U . . .
C11 C 0.35509(11) 0.3207(2) 0.75741(8) 0.0235(4) Uani 1 1 d . . . . .
H11A H 0.3930 0.3674 0.7892 0.035 Uiso 1 1 calc R U . . .
H11B H 0.3695 0.2216 0.7545 0.035 Uiso 1 1 calc R U . . .
H11C H 0.3068 0.3238 0.7651 0.035 Uiso 1 1 calc R U . . .
C12 C 0.30636(11) 0.59729(19) 0.68922(9) 0.0265(5) Uani 1 1 d . . . . .
H12A H 0.2611 0.5892 0.7012 0.040 Uiso 1 1 calc R U . . .
H12B H 0.2939 0.6399 0.6505 0.040 Uiso 1 1 calc R U . . .
H12C H 0.3428 0.6573 0.7169 0.040 Uiso 1 1 calc R U . . .
C13 C 0.44374(11) 0.5565(2) 0.60480(8) 0.0232(4) Uani 1 1 d . . . . .
H13A H 0.4132 0.6402 0.6059 0.035 Uiso 1 1 calc R U . . .
H13B H 0.4166 0.4938 0.5731 0.035 Uiso 1 1 calc R U . . .
H13C H 0.4906 0.5865 0.5985 0.035 Uiso 1 1 calc R U . . .
C14 C 0.51947(11) 0.57848(19) 0.73610(9) 0.0254(4) Uani 1 1 d . . . . .
H14A H 0.5665 0.6050 0.7292 0.038 Uiso 1 1 calc R U . . .
H14B H 0.5301 0.5286 0.7733 0.038 Uiso 1 1 calc R U . . .
H14C H 0.4903 0.6642 0.7371 0.038 Uiso 1 1 calc R U . . .
C15 C 0.43045(10) -0.04613(19) 0.68781(8) 0.0202(4) Uani 1 1 d . . . . .
H15A H 0.4025 -0.1307 0.6699 0.030 Uiso 1 1 calc R U . . .
H15B H 0.3993 0.0125 0.7048 0.030 Uiso 1 1 calc R U . . .
H15C H 0.4756 -0.0751 0.7183 0.030 Uiso 1 1 calc R U . . .
C16 C 0.50969(11) -0.06068(19) 0.59406(9) 0.0240(4) Uani 1 1 d . . . . .
H16A H 0.5553 -0.0952 0.6227 0.036 Uiso 1 1 calc R U . . .
H16B H 0.5229 -0.0074 0.5637 0.036 Uiso 1 1 calc R U . . .
H16C H 0.4781 -0.1416 0.5766 0.036 Uiso 1 1 calc R U . . .
C17 C 0.29278(11) -0.0469(2) 0.53864(9) 0.0289(5) Uani 1 1 d . . . . .
H17A H 0.2450 -0.0267 0.5094 0.043 Uiso 1 1 calc R U . . .
H17B H 0.2837 -0.0960 0.5716 0.043 Uiso 1 1 calc R U . . .
H17C H 0.3232 -0.1073 0.5216 0.043 Uiso 1 1 calc R U . . .
C18 C 0.35859(12) 0.2099(2) 0.49786(8) 0.0277(5) Uani 1 1 d . . . . .
H18A H 0.3905 0.1486 0.4827 0.042 Uiso 1 1 calc R U . . .
H18B H 0.3827 0.3025 0.5083 0.042 Uiso 1 1 calc R U . . .
H18C H 0.3103 0.2225 0.4682 0.042 Uiso 1 1 calc R U . . .
C19 C 0.12671(14) 0.2630(2) 0.48087(9) 0.0415(6) Uani 1 1 d . . . . .
H19A H 0.1047 0.1991 0.5032 0.062 Uiso 1 1 calc R U . . .
H19B H 0.1592 0.2087 0.4636 0.062 Uiso 1 1 calc R U . . .
H19C H 0.0869 0.3081 0.4500 0.062 Uiso 1 1 calc R U . . .
C20 C 0.11598(12) 0.5210(2) 0.55151(10) 0.0354(5) Uani 1 1 d . . . . .
H20A H 0.1438 0.5883 0.5811 0.053 Uiso 1 1 calc R U . . .
H20B H 0.0832 0.4636 0.5673 0.053 Uiso 1 1 calc R U . . .
H20C H 0.0859 0.5733 0.5174 0.053 Uiso 1 1 calc R U . . .
C21 C 0.23318(12) 0.5161(2) 0.49027(10) 0.0383(6) Uani 1 1 d . . . . .
H21A H 0.1975 0.5531 0.4548 0.057 Uiso 1 1 calc R U . . .
H21B H 0.2711 0.4592 0.4801 0.057 Uiso 1 1 calc R U . . .
H21C H 0.2573 0.5955 0.5151 0.057 Uiso 1 1 calc R U . . .
C22 C 0.57136(12) 0.3155(2) 0.54089(8) 0.0304(5) Uani 1 1 d . . . . .
H22A H 0.6070 0.3403 0.5200 0.046 Uiso 1 1 calc R U . . .
H22B H 0.5313 0.3863 0.5325 0.046 Uiso 1 1 calc R U . . .
H22C H 0.5501 0.2217 0.5283 0.046 Uiso 1 1 calc R U . . .
C23 C 0.65972(11) 0.4941(2) 0.64269(9) 0.0312(5) Uani 1 1 d . . . . .
H23A H 0.6971 0.5159 0.6230 0.047 Uiso 1 1 calc R U . . .
H23B H 0.6832 0.4969 0.6848 0.047 Uiso 1 1 calc R U . . .
H23C H 0.6194 0.5643 0.6317 0.047 Uiso 1 1 calc R U . . .
C24 C 0.69958(12) 0.1819(2) 0.63463(10) 0.0365(5) Uani 1 1 d . . . . .
H24A H 0.6796 0.0861 0.6246 0.055 Uiso 1 1 calc R U . . .
H24B H 0.7288 0.1849 0.6757 0.055 Uiso 1 1 calc R U . . .
H24C H 0.7317 0.2068 0.6108 0.055 Uiso 1 1 calc R U . . .
C25 C 0.68888(12) 0.2975(2) 0.80020(10) 0.0366(5) Uani 1 1 d . . . . .
H25A H 0.6706 0.3942 0.8020 0.055 Uiso 1 1 calc R U . . .
H25B H 0.7222 0.2963 0.7759 0.055 Uiso 1 1 calc R U . . .
H25C H 0.7162 0.2652 0.8394 0.055 Uiso 1 1 calc R U . . .
C26 C 0.64372(12) -0.0077(2) 0.76303(9) 0.0327(5) Uani 1 1 d . . . . .
H26A H 0.6725 -0.0406 0.8018 0.049 Uiso 1 1 calc R U . . .
H26B H 0.6759 -0.0066 0.7377 0.049 Uiso 1 1 calc R U . . .
H26C H 0.6015 -0.0719 0.7468 0.049 Uiso 1 1 calc R U . . .
C27 C 0.54980(12) 0.1694(2) 0.81880(9) 0.0347(5) Uani 1 1 d . . . . .
H27A H 0.5784 0.1244 0.8553 0.052 Uiso 1 1 calc R U . . .
H27B H 0.5045 0.1140 0.8010 0.052 Uiso 1 1 calc R U . . .
H27C H 0.5360 0.2660 0.8266 0.052 Uiso 1 1 calc R U . . .
Ge1 Ge 0.27087(2) 0.27750(2) 0.60723(2) 0.01338(5) Uani 1 1 d . . . . .
Ge2 Ge 0.53639(2) 0.25216(2) 0.67398(2) 0.01360(5) Uani 1 1 d . . . . .
O1 O 0.25066(7) 0.04435(14) 0.67480(6) 0.0250(3) Uani 1 1 d . . . . .
Si1 Si 0.34752(3) 0.41500(5) 0.68751(2) 0.01587(11) Uani 1 1 d . . . . .
Si2 Si 0.46462(3) 0.45842(5) 0.67596(2) 0.01535(11) Uani 1 1 d . . . . .
Si3 Si 0.45733(3) 0.05913(5) 0.63104(2) 0.01448(11) Uani 1 1 d . . . . .
Si4 Si 0.34376(3) 0.12522(5) 0.56424(2) 0.01606(11) Uani 1 1 d . . . . .
Si5 Si 0.18279(3) 0.40264(5) 0.52999(2) 0.02151(12) Uani 1 1 d . . . . .
Si6 Si 0.62044(3) 0.31216(6) 0.62081(2) 0.02087(12) Uani 1 1 d . . . . .
Si7 Si 0.60786(3) 0.17618(6) 0.76828(2) 0.02198(12) Uani 1 1 d . . . . .
 
loop_
 _atom_site_aniso_label
 _atom_site_aniso_U_11
 _atom_site_aniso_U_22
 _atom_site_aniso_U_33
 _atom_site_aniso_U_23
 _atom_site_aniso_U_13
 _atom_site_aniso_U_12
C1 0.0206(10) 0.0126(9) 0.0157(9) -0.0038(7) 0.0078(8) -0.0019(7)
C2 0.0180(9) 0.0159(9) 0.0158(9) 0.0035(7) 0.0074(7) -0.0016(7)
C3 0.0193(10) 0.0188(9) 0.0180(9) 0.0028(7) 0.0089(8) -0.0014(7)
C4 0.0213(10) 0.0221(10) 0.0247(10) 0.0019(8) 0.0119(8) 0.0042(8)
C5 0.0160(10) 0.0298(11) 0.0250(11) 0.0057(9) 0.0053(8) -0.0007(8)
C6 0.0212(10) 0.0245(10) 0.0234(11) -0.0010(8) 0.0041(8) -0.0060(8)
C7 0.0205(10) 0.0169(9) 0.0200(10) 0.0025(8) 0.0064(8) -0.0006(7)
C8 0.0222(10) 0.0194(10) 0.0260(10) -0.0045(8) 0.0132(8) 0.0004(8)
C9 0.0205(11) 0.0407(13) 0.0426(14) 0.0013(11) 0.0064(10) 0.0010(10)
C10 0.0271(11) 0.0216(10) 0.0344(12) -0.0068(9) 0.0090(9) -0.0042(8)
C11 0.0260(11) 0.0280(11) 0.0190(10) -0.0031(8) 0.0104(8) -0.0036(8)
C12 0.0255(11) 0.0152(10) 0.0431(13) -0.0089(9) 0.0165(10) -0.0020(8)
C13 0.0250(11) 0.0191(10) 0.0274(11) 0.0060(8) 0.0108(9) 0.0025(8)
C14 0.0265(11) 0.0176(10) 0.0312(11) -0.0056(8) 0.0075(9) -0.0033(8)
C15 0.0204(10) 0.0160(9) 0.0244(10) 0.0023(8) 0.0072(8) -0.0006(7)
C16 0.0260(11) 0.0189(10) 0.0299(11) -0.0068(8) 0.0128(9) 0.0005(8)
C17 0.0242(11) 0.0254(11) 0.0356(12) -0.0157(9) 0.0070(9) -0.0025(9)
C18 0.0284(11) 0.0385(12) 0.0197(10) 0.0001(9) 0.0123(9) 0.0062(9)
C19 0.0522(15) 0.0370(13) 0.0244(12) 0.0046(10) -0.0048(11) -0.0069(11)
C20 0.0347(13) 0.0320(12) 0.0409(13) 0.0116(10) 0.0136(11) 0.0136(10)
C21 0.0390(13) 0.0363(13) 0.0443(14) 0.0210(11) 0.0197(11) 0.0103(10)
C22 0.0319(12) 0.0401(13) 0.0237(11) 0.0005(9) 0.0153(9) -0.0063(10)
C23 0.0234(11) 0.0340(12) 0.0372(13) 0.0016(10) 0.0107(9) -0.0091(9)
C24 0.0268(12) 0.0422(13) 0.0466(14) 0.0019(11) 0.0202(11) 0.0048(10)
C25 0.0316(13) 0.0357(12) 0.0315(13) -0.0006(10) -0.0070(10) -0.0035(10)
C26 0.0258(11) 0.0270(11) 0.0385(13) 0.0061(10) -0.0004(10) 0.0048(9)
C27 0.0439(14) 0.0411(13) 0.0179(11) 0.0042(10) 0.0077(10) 0.0011(11)
Ge1 0.01534(10) 0.01112(9) 0.01551(10) -0.00091(7) 0.00740(8) -0.00050(7)
Ge2 0.01472(10) 0.01217(9) 0.01459(10) -0.00018(7) 0.00544(7) -0.00041(7)
O1 0.0214(7) 0.0231(7) 0.0313(8) 0.0107(6) 0.0092(6) 0.0024(6)
Si1 0.0183(3) 0.0122(2) 0.0192(3) -0.0037(2) 0.0089(2) -0.00119(19)
Si2 0.0178(3) 0.0109(2) 0.0186(3) -0.00110(19) 0.0074(2) -0.00135(19)
Si3 0.0162(3) 0.0116(2) 0.0173(3) -0.00225(19) 0.0076(2) 0.00033(19)
Si4 0.0170(3) 0.0166(2) 0.0157(3) -0.0042(2) 0.0067(2) -0.0002(2)
Si5 0.0246(3) 0.0187(3) 0.0212(3) 0.0056(2) 0.0070(2) 0.0022(2)
Si6 0.0168(3) 0.0252(3) 0.0231(3) 0.0012(2) 0.0097(2) -0.0020(2)
Si7 0.0223(3) 0.0220(3) 0.0179(3) 0.0018(2) 0.0006(2) -0.0001(2)
 
_geom_special_details
;
 All esds (except the esd in the dihedral angle between two l.s. planes)
 are estimated using the full covariance matrix.  The cell esds are taken
 into account individually in the estimation of esds in distances, angles
 and torsion angles; correlations between esds in cell parameters are only
 used when they are defined by crystal symmetry.  An approximate (isotropic)
 treatment of cell esds is used for estimating esds involving l.s. planes.
;
 
loop_
 _geom_bond_atom_site_label_1
 _geom_bond_atom_site_label_2
 _geom_bond_distance
 _geom_bond_site_symmetry_2
 _geom_bond_publ_flag
C1 O1 1.217(2) . ?
C1 C2 1.513(2) . ?
C1 Ge1 2.0438(17) . ?
C2 C7 1.403(2) . ?
C2 C3 1.403(2) . ?
C3 C4 1.392(3) . ?
C3 C8 1.508(2) . ?
C4 C5 1.386(3) . ?
C4 H4 0.9500 . ?
C5 C6 1.388(3) . ?
C5 C9 1.510(3) . ?
C6 C7 1.392(3) . ?
C6 H6 0.9500 . ?
C7 C10 1.509(3) . ?
C8 H8A 0.9800 . ?
C8 H8B 0.9800 . ?
C8 H8C 0.9800 . ?
C9 H9A 0.9800 . ?
C9 H9B 0.9800 . ?
C9 H9C 0.9800 . ?
C10 H10A 0.9800 . ?
C10 H10B 0.9800 . ?
C10 H10C 0.9800 . ?
C11 Si1 1.8756(19) . ?
C11 H11A 0.9800 . ?
C11 H11B 0.9800 . ?
C11 H11C 0.9800 . ?
C12 Si1 1.8886(18) . ?
C12 H12A 0.9800 . ?
C12 H12B 0.9800 . ?
C12 H12C 0.9800 . ?
C13 Si2 1.8863(19) . ?
C13 H13A 0.9800 . ?
C13 H13B 0.9800 . ?
C13 H13C 0.9800 . ?
C14 Si2 1.8845(19) . ?
C14 H14A 0.9800 . ?
C14 H14B 0.9800 . ?
C14 H14C 0.9800 . ?
C15 Si3 1.8805(18) . ?
C15 H15A 0.9800 . ?
C15 H15B 0.9800 . ?
C15 H15C 0.9800 . ?
C16 Si3 1.8891(18) . ?
C16 H16A 0.9800 . ?
C16 H16B 0.9800 . ?
C16 H16C 0.9800 . ?
C17 Si4 1.8901(19) . ?
C17 H17A 0.9800 . ?
C17 H17B 0.9800 . ?
C17 H17C 0.9800 . ?
C18 Si4 1.885(2) . ?
C18 H18A 0.9800 . ?
C18 H18B 0.9800 . ?
C18 H18C 0.9800 . ?
C19 Si5 1.870(2) . ?
C19 H19A 0.9800 . ?
C19 H19B 0.9800 . ?
C19 H19C 0.9800 . ?
C20 Si5 1.866(2) . ?
C20 H20A 0.9800 . ?
C20 H20B 0.9800 . ?
C20 H20C 0.9800 . ?
C21 Si5 1.873(2) . ?
C21 H21A 0.9800 . ?
C21 H21B 0.9800 . ?
C21 H21C 0.9800 . ?
C22 Si6 1.873(2) . ?
C22 H22A 0.9800 . ?
C22 H22B 0.9800 . ?
C22 H22C 0.9800 . ?
C23 Si6 1.877(2) . ?
C23 H23A 0.9800 . ?
C23 H23B 0.9800 . ?
C23 H23C 0.9800 . ?
C24 Si6 1.878(2) . ?
C24 H24A 0.9800 . ?
C24 H24B 0.9800 . ?
C24 H24C 0.9800 . ?
C25 Si7 1.874(2) . ?
C25 H25A 0.9800 . ?
C25 H25B 0.9800 . ?
C25 H25C 0.9800 . ?
C26 Si7 1.876(2) . ?
C26 H26A 0.9800 . ?
C26 H26B 0.9800 . ?
C26 H26C 0.9800 . ?
C27 Si7 1.867(2) . ?
C27 H27A 0.9800 . ?
C27 H27B 0.9800 . ?
C27 H27C 0.9800 . ?
Ge1 Si5 2.3986(6) . ?
Ge1 Si1 2.4151(6) . ?
Ge1 Si4 2.4222(5) . ?
Ge2 Si2 2.3734(6) . ?
Ge2 Si3 2.3793(6) . ?
Ge2 Si7 2.3803(6) . ?
Ge2 Si6 2.3838(6) . ?
Si1 Si2 2.3354(8) . ?
Si3 Si4 2.3395(7) . ?
 
loop_
 _geom_angle_atom_site_label_1
 _geom_angle_atom_site_label_2
 _geom_angle_atom_site_label_3
 _geom_angle
 _geom_angle_site_symmetry_1
 _geom_angle_site_symmetry_3
 _geom_angle_publ_flag
O1 C1 C2 120.07(15) . . ?
O1 C1 Ge1 118.16(13) . . ?
C2 C1 Ge1 121.72(12) . . ?
C7 C2 C3 120.02(16) . . ?
C7 C2 C1 119.09(15) . . ?
C3 C2 C1 120.89(15) . . ?
C4 C3 C2 119.01(17) . . ?
C4 C3 C8 119.26(16) . . ?
C2 C3 C8 121.71(16) . . ?
C5 C4 C3 122.00(17) . . ?
C5 C4 H4 119.0 . . ?
C3 C4 H4 119.0 . . ?
C6 C5 C4 117.95(17) . . ?
C6 C5 C9 120.80(18) . . ?
C4 C5 C9 121.25(18) . . ?
C5 C6 C7 122.26(17) . . ?
C5 C6 H6 118.9 . . ?
C7 C6 H6 118.9 . . ?
C6 C7 C2 118.75(17) . . ?
C6 C7 C10 118.91(17) . . ?
C2 C7 C10 122.34(16) . . ?
C3 C8 H8A 109.5 . . ?
C3 C8 H8B 109.5 . . ?
H8A C8 H8B 109.5 . . ?
C3 C8 H8C 109.5 . . ?
H8A C8 H8C 109.5 . . ?
H8B C8 H8C 109.5 . . ?
C5 C9 H9A 109.5 . . ?
C5 C9 H9B 109.5 . . ?
H9A C9 H9B 109.5 . . ?
C5 C9 H9C 109.5 . . ?
H9A C9 H9C 109.5 . . ?
H9B C9 H9C 109.5 . . ?
C7 C10 H10A 109.5 . . ?
C7 C10 H10B 109.5 . . ?
H10A C10 H10B 109.5 . . ?
C7 C10 H10C 109.5 . . ?
H10A C10 H10C 109.5 . . ?
H10B C10 H10C 109.5 . . ?
Si1 C11 H11A 109.5 . . ?
Si1 C11 H11B 109.5 . . ?
H11A C11 H11B 109.5 . . ?
Si1 C11 H11C 109.5 . . ?
H11A C11 H11C 109.5 . . ?
H11B C11 H11C 109.5 . . ?
Si1 C12 H12A 109.5 . . ?
Si1 C12 H12B 109.5 . . ?
H12A C12 H12B 109.5 . . ?
Si1 C12 H12C 109.5 . . ?
H12A C12 H12C 109.5 . . ?
H12B C12 H12C 109.5 . . ?
Si2 C13 H13A 109.5 . . ?
Si2 C13 H13B 109.5 . . ?
H13A C13 H13B 109.5 . . ?
Si2 C13 H13C 109.5 . . ?
H13A C13 H13C 109.5 . . ?
H13B C13 H13C 109.5 . . ?
Si2 C14 H14A 109.5 . . ?
Si2 C14 H14B 109.5 . . ?
H14A C14 H14B 109.5 . . ?
Si2 C14 H14C 109.5 . . ?
H14A C14 H14C 109.5 . . ?
H14B C14 H14C 109.5 . . ?
Si3 C15 H15A 109.5 . . ?
Si3 C15 H15B 109.5 . . ?
H15A C15 H15B 109.5 . . ?
Si3 C15 H15C 109.5 . . ?
H15A C15 H15C 109.5 . . ?
H15B C15 H15C 109.5 . . ?
Si3 C16 H16A 109.5 . . ?
Si3 C16 H16B 109.5 . . ?
H16A C16 H16B 109.5 . . ?
Si3 C16 H16C 109.5 . . ?
H16A C16 H16C 109.5 . . ?
H16B C16 H16C 109.5 . . ?
Si4 C17 H17A 109.5 . . ?
Si4 C17 H17B 109.5 . . ?
H17A C17 H17B 109.5 . . ?
Si4 C17 H17C 109.5 . . ?
H17A C17 H17C 109.5 . . ?
H17B C17 H17C 109.5 . . ?
Si4 C18 H18A 109.5 . . ?
Si4 C18 H18B 109.5 . . ?
H18A C18 H18B 109.5 . . ?
Si4 C18 H18C 109.5 . . ?
H18A C18 H18C 109.5 . . ?
H18B C18 H18C 109.5 . . ?
Si5 C19 H19A 109.5 . . ?
Si5 C19 H19B 109.5 . . ?
H19A C19 H19B 109.5 . . ?
Si5 C19 H19C 109.5 . . ?
H19A C19 H19C 109.5 . . ?
H19B C19 H19C 109.5 . . ?
Si5 C20 H20A 109.5 . . ?
Si5 C20 H20B 109.5 . . ?
H20A C20 H20B 109.5 . . ?
Si5 C20 H20C 109.5 . . ?
H20A C20 H20C 109.5 . . ?
H20B C20 H20C 109.5 . . ?
Si5 C21 H21A 109.5 . . ?
Si5 C21 H21B 109.5 . . ?
H21A C21 H21B 109.5 . . ?
Si5 C21 H21C 109.5 . . ?
H21A C21 H21C 109.5 . . ?
H21B C21 H21C 109.5 . . ?
Si6 C22 H22A 109.5 . . ?
Si6 C22 H22B 109.5 . . ?
H22A C22 H22B 109.5 . . ?
Si6 C22 H22C 109.5 . . ?
H22A C22 H22C 109.5 . . ?
H22B C22 H22C 109.5 . . ?
Si6 C23 H23A 109.5 . . ?
Si6 C23 H23B 109.5 . . ?
H23A C23 H23B 109.5 . . ?
Si6 C23 H23C 109.5 . . ?
H23A C23 H23C 109.5 . . ?
H23B C23 H23C 109.5 . . ?
Si6 C24 H24A 109.5 . . ?
Si6 C24 H24B 109.5 . . ?
H24A C24 H24B 109.5 . . ?
Si6 C24 H24C 109.5 . . ?
H24A C24 H24C 109.5 . . ?
H24B C24 H24C 109.5 . . ?
Si7 C25 H25A 109.5 . . ?
Si7 C25 H25B 109.5 . . ?
H25A C25 H25B 109.5 . . ?
Si7 C25 H25C 109.5 . . ?
H25A C25 H25C 109.5 . . ?
H25B C25 H25C 109.5 . . ?
Si7 C26 H26A 109.5 . . ?
Si7 C26 H26B 109.5 . . ?
H26A C26 H26B 109.5 . . ?
Si7 C26 H26C 109.5 . . ?
H26A C26 H26C 109.5 . . ?
H26B C26 H26C 109.5 . . ?
Si7 C27 H27A 109.5 . . ?
Si7 C27 H27B 109.5 . . ?
H27A C27 H27B 109.5 . . ?
Si7 C27 H27C 109.5 . . ?
H27A C27 H27C 109.5 . . ?
H27B C27 H27C 109.5 . . ?
C1 Ge1 Si5 109.36(5) . . ?
C1 Ge1 Si1 104.48(5) . . ?
Si5 Ge1 Si1 117.81(2) . . ?
C1 Ge1 Si4 103.93(5) . . ?
Si5 Ge1 Si4 107.70(2) . . ?
Si1 Ge1 Si4 112.62(2) . . ?
Si2 Ge2 Si3 110.51(2) . . ?
Si2 Ge2 Si7 112.77(2) . . ?
Si3 Ge2 Si7 106.62(2) . . ?
Si2 Ge2 Si6 106.81(2) . . ?
Si3 Ge2 Si6 111.96(2) . . ?
Si7 Ge2 Si6 108.23(2) . . ?
C11 Si1 C12 109.37(9) . . ?
C11 Si1 Si2 111.81(7) . . ?
C12 Si1 Si2 104.47(6) . . ?
C11 Si1 Ge1 109.55(6) . . ?
C12 Si1 Ge1 110.86(7) . . ?
Si2 Si1 Ge1 110.70(2) . . ?
C14 Si2 C13 108.93(9) . . ?
C14 Si2 Si1 109.22(7) . . ?
C13 Si2 Si1 104.45(6) . . ?
C14 Si2 Ge2 108.94(6) . . ?
C13 Si2 Ge2 110.26(6) . . ?
Si1 Si2 Ge2 114.85(2) . . ?
C15 Si3 C16 108.80(9) . . ?
C15 Si3 Si4 104.73(6) . . ?
C16 Si3 Si4 109.21(7) . . ?
C15 Si3 Ge2 110.75(6) . . ?
C16 Si3 Ge2 108.50(6) . . ?
Si4 Si3 Ge2 114.68(2) . . ?
C18 Si4 C17 105.92(10) . . ?
C18 Si4 Si3 111.23(7) . . ?
C17 Si4 Si3 105.35(7) . . ?
C18 Si4 Ge1 111.20(7) . . ?
C17 Si4 Ge1 110.62(6) . . ?
Si3 Si4 Ge1 112.18(2) . . ?
C20 Si5 C19 107.42(11) . . ?
C20 Si5 C21 106.73(10) . . ?
C19 Si5 C21 110.57(11) . . ?
C20 Si5 Ge1 116.19(7) . . ?
C19 Si5 Ge1 105.87(7) . . ?
C21 Si5 Ge1 110.03(7) . . ?
C22 Si6 C23 107.75(10) . . ?
C22 Si6 C24 108.18(10) . . ?
C23 Si6 C24 108.84(10) . . ?
C22 Si6 Ge2 111.04(7) . . ?
C23 Si6 Ge2 109.43(7) . . ?
C24 Si6 Ge2 111.50(7) . . ?
C27 Si7 C25 108.29(11) . . ?
C27 Si7 C26 107.73(10) . . ?
C25 Si7 C26 109.08(10) . . ?
C27 Si7 Ge2 111.35(7) . . ?
C25 Si7 Ge2 111.42(7) . . ?
C26 Si7 Ge2 108.87(7) . . ?
 
loop_
 _geom_torsion_atom_site_label_1
 _geom_torsion_atom_site_label_2
 _geom_torsion_atom_site_label_3
 _geom_torsion_atom_site_label_4
 _geom_torsion
 _geom_torsion_site_symmetry_1
 _geom_torsion_site_symmetry_2
 _geom_torsion_site_symmetry_3
 _geom_torsion_site_symmetry_4
 _geom_torsion_publ_flag
O1 C1 C2 C7 -64.1(2) . . . . ?
Ge1 C1 C2 C7 113.28(16) . . . . ?
O1 C1 C2 C3 115.11(19) . . . . ?
Ge1 C1 C2 C3 -67.5(2) . . . . ?
C7 C2 C3 C4 -0.2(3) . . . . ?
C1 C2 C3 C4 -179.36(16) . . . . ?
C7 C2 C3 C8 177.97(16) . . . . ?
C1 C2 C3 C8 -1.2(3) . . . . ?
C2 C3 C4 C5 -0.5(3) . . . . ?
C8 C3 C4 C5 -178.74(17) . . . . ?
C3 C4 C5 C6 0.4(3) . . . . ?
C3 C4 C5 C9 179.84(18) . . . . ?
C4 C5 C6 C7 0.5(3) . . . . ?
C9 C5 C6 C7 -178.98(18) . . . . ?
C5 C6 C7 C2 -1.1(3) . . . . ?
C5 C6 C7 C10 179.33(18) . . . . ?
C3 C2 C7 C6 1.0(3) . . . . ?
C1 C2 C7 C6 -179.82(16) . . . . ?
C3 C2 C7 C10 -179.50(17) . . . . ?
C1 C2 C7 C10 -0.3(3) . . . . ?
 
_refine_diff_density_max    0.417
_refine_diff_density_min   -0.324
_refine_diff_density_rms    0.063

_shelxl_version_number 2014-3

_shelx_res_file
;
TITL AT356 in P2(1)/n
CELL  0.71073  18.7857   9.4192  24.1624   90.000  107.504   90.000
ZERR 4 0.00260 0.00120 0.00300 0.0000 0.0064 0.0000
LATT 1
SYMM 1/2-X, 1/2+Y, 1/2-Z
SFAC C  H  Ge O  Si
UNIT 108 248 8 4 28
REM Solution 1  R1  0.087  Rweak  0.004,  Alpha= 0.0376  in P2(1)/n
REM Formula:  C18 Ge2 O10 Si7
L.S. 40
ACTA
OMIT 1 0 1
HTAB
CONF
BOND $H
FMAP 2
PLAN 20
SIZE 0.014 0.030 0.150
TEMP -169.790
WGHT    0.025600    1.316000
FVAR       0.23609
C1    1    0.215132    0.138835    0.644441    11.00000    0.02057    0.01262 =
         0.01573   -0.00381    0.00779   -0.00188
C2    1    0.131534    0.147711    0.633043    11.00000    0.01805    0.01589 =
         0.01578    0.00352    0.00742   -0.00163
C3    1    0.099245    0.263126    0.653322    11.00000    0.01928    0.01883 =
         0.01795    0.00280    0.00890   -0.00143
C4    1    0.022131    0.266367    0.642368    11.00000    0.02127    0.02211 =
         0.02473    0.00192    0.01186    0.00425
AFIX  43
H4    2    0.000318    0.344115    0.656389    11.00000   -1.20000
AFIX   0
C5    1   -0.023767    0.159618    0.611632    11.00000    0.01603    0.02984 =
         0.02502    0.00571    0.00529   -0.00070
C6    1    0.009417    0.046705    0.591915    11.00000    0.02121    0.02446 =
         0.02335   -0.00103    0.00410   -0.00604
AFIX  43
H6    2   -0.021393   -0.026895    0.570541    11.00000   -1.20000
AFIX   0
C7    1    0.086274    0.037571    0.602371    11.00000    0.02051    0.01691 =
         0.01995    0.00254    0.00644   -0.00063
C8    1    0.146058    0.381252    0.688120    11.00000    0.02216    0.01941 =
         0.02601   -0.00448    0.01322    0.00044
AFIX 137
H8A   2    0.114339    0.463838    0.688145    11.00000   -1.50000
H8B   2    0.185088    0.407513    0.670738    11.00000   -1.50000
H8C   2    0.169174    0.349180    0.728093    11.00000   -1.50000
AFIX   0
C9    1   -0.107294    0.164785    0.600310    11.00000    0.02052    0.04069 =
         0.04256    0.00126    0.00643    0.00096
AFIX 137
H9A   2   -0.119312    0.233448    0.626639    11.00000   -1.50000
H9B   2   -0.125374    0.070588    0.606895    11.00000   -1.50000
H9C   2   -0.131393    0.193670    0.560049    11.00000   -1.50000
AFIX   0
C10   1    0.117937   -0.089653    0.579960    11.00000    0.02706    0.02156 =
         0.03445   -0.00677    0.00899   -0.00415
AFIX 137
H10A  2    0.077178   -0.153003    0.559394    11.00000   -1.50000
H10B  2    0.152134   -0.140564    0.612619    11.00000   -1.50000
H10C  2    0.145064   -0.058021    0.553313    11.00000   -1.50000
AFIX   0
C11   1    0.355087    0.320672    0.757408    11.00000    0.02602    0.02795 =
         0.01897   -0.00313    0.01037   -0.00361
AFIX 137
H11A  2    0.392960    0.367367    0.789179    11.00000   -1.50000
H11B  2    0.369466    0.221605    0.754453    11.00000   -1.50000
H11C  2    0.306789    0.323758    0.765117    11.00000   -1.50000
AFIX   0
C12   1    0.306359    0.597289    0.689218    11.00000    0.02549    0.01517 =
         0.04306   -0.00887    0.01647   -0.00197
AFIX 137
H12A  2    0.261069    0.589225    0.701154    11.00000   -1.50000
H12B  2    0.293874    0.639897    0.650474    11.00000   -1.50000
H12C  2    0.342778    0.657335    0.716916    11.00000   -1.50000
AFIX   0
C13   1    0.443745    0.556524    0.604800    11.00000    0.02500    0.01910 =
         0.02739    0.00597    0.01078    0.00254
AFIX 137
H13A  2    0.413197    0.640231    0.605852    11.00000   -1.50000
H13B  2    0.416551    0.493827    0.573122    11.00000   -1.50000
H13C  2    0.490640    0.586484    0.598458    11.00000   -1.50000
AFIX   0
C14   1    0.519467    0.578478    0.736096    11.00000    0.02646    0.01762 =
         0.03121   -0.00564    0.00749   -0.00328
AFIX 137
H14A  2    0.566504    0.605032    0.729166    11.00000   -1.50000
H14B  2    0.530111    0.528645    0.773304    11.00000   -1.50000
H14C  2    0.490308    0.664190    0.737094    11.00000   -1.50000
AFIX   0
C15   1    0.430449   -0.046133    0.687810    11.00000    0.02039    0.01604 =
         0.02437    0.00226    0.00722   -0.00058
AFIX 137
H15A  2    0.402479   -0.130696    0.669946    11.00000   -1.50000
H15B  2    0.399262    0.012489    0.704766    11.00000   -1.50000
H15C  2    0.475596   -0.075051    0.718300    11.00000   -1.50000
AFIX   0
C16   1    0.509693   -0.060684    0.594058    11.00000    0.02596    0.01894 =
         0.02987   -0.00676    0.01279    0.00048
AFIX 137
H16A  2    0.555257   -0.095230    0.622664    11.00000   -1.50000
H16B  2    0.522922   -0.007426    0.563719    11.00000   -1.50000
H16C  2    0.478062   -0.141553    0.576605    11.00000   -1.50000
AFIX   0
C17   1    0.292780   -0.046913    0.538639    11.00000    0.02425    0.02540 =
         0.03559   -0.01566    0.00696   -0.00246
AFIX 137
H17A  2    0.244978   -0.026672    0.509391    11.00000   -1.50000
H17B  2    0.283747   -0.096026    0.571650    11.00000   -1.50000
H17C  2    0.323178   -0.107293    0.521603    11.00000   -1.50000
AFIX   0
C18   1    0.358593    0.209857    0.497863    11.00000    0.02839    0.03849 =
         0.01966    0.00013    0.01231    0.00623
AFIX 137
H18A  2    0.390512    0.148553    0.482660    11.00000   -1.50000
H18B  2    0.382668    0.302478    0.508257    11.00000   -1.50000
H18C  2    0.310306    0.222537    0.468168    11.00000   -1.50000
AFIX   0
C19   1    0.126707    0.263004    0.480869    11.00000    0.05222    0.03701 =
         0.02435    0.00457   -0.00485   -0.00687
AFIX 137
H19A  2    0.104661    0.199060    0.503218    11.00000   -1.50000
H19B  2    0.159176    0.208655    0.463632    11.00000   -1.50000
H19C  2    0.086891    0.308113    0.450013    11.00000   -1.50000
AFIX   0
C20   1    0.115982    0.521002    0.551507    11.00000    0.03468    0.03202 =
         0.04088    0.01160    0.01362    0.01362
AFIX 137
H20A  2    0.143815    0.588294    0.581059    11.00000   -1.50000
H20B  2    0.083173    0.463551    0.567322    11.00000   -1.50000
H20C  2    0.085866    0.573335    0.517443    11.00000   -1.50000
AFIX   0
C21   1    0.233183    0.516125    0.490273    11.00000    0.03897    0.03626 =
         0.04432    0.02097    0.01971    0.01028
AFIX 137
H21A  2    0.197504    0.553108    0.454777    11.00000   -1.50000
H21B  2    0.271123    0.459188    0.480146    11.00000   -1.50000
H21C  2    0.257295    0.595472    0.515111    11.00000   -1.50000
AFIX   0
C22   1    0.571357    0.315495    0.540895    11.00000    0.03191    0.04008 =
         0.02369    0.00054    0.01532   -0.00630
AFIX 137
H22A  2    0.607023    0.340301    0.520043    11.00000   -1.50000
H22B  2    0.531287    0.386270    0.532532    11.00000   -1.50000
H22C  2    0.550086    0.221656    0.528299    11.00000   -1.50000
AFIX   0
C23   1    0.659722    0.494065    0.642688    11.00000    0.02342    0.03399 =
         0.03722    0.00159    0.01072   -0.00915
AFIX 137
H23A  2    0.697066    0.515919    0.623035    11.00000   -1.50000
H23B  2    0.683183    0.496927    0.684796    11.00000   -1.50000
H23C  2    0.619423    0.564296    0.631650    11.00000   -1.50000
AFIX   0
C24   1    0.699579    0.181919    0.634630    11.00000    0.02681    0.04225 =
         0.04659    0.00187    0.02016    0.00479
AFIX 137
H24A  2    0.679558    0.086070    0.624609    11.00000   -1.50000
H24B  2    0.728795    0.184926    0.675731    11.00000   -1.50000
H24C  2    0.731675    0.206811    0.610759    11.00000   -1.50000
AFIX   0
C25   1    0.688876    0.297459    0.800200    11.00000    0.03157    0.03568 =
         0.03155   -0.00064   -0.00695   -0.00346
AFIX 137
H25A  2    0.670583    0.394249    0.802035    11.00000   -1.50000
H25B  2    0.722236    0.296347    0.775861    11.00000   -1.50000
H25C  2    0.716189    0.265217    0.839403    11.00000   -1.50000
AFIX   0
C26   1    0.643719   -0.007694    0.763034    11.00000    0.02580    0.02703 =
         0.03850    0.00611   -0.00044    0.00481
AFIX 137
H26A  2    0.672470   -0.040602    0.801789    11.00000   -1.50000
H26B  2    0.675868   -0.006583    0.737741    11.00000   -1.50000
H26C  2    0.601547   -0.071932    0.746836    11.00000   -1.50000
AFIX   0
C27   1    0.549799    0.169359    0.818801    11.00000    0.04390    0.04114 =
         0.01787    0.00422    0.00768    0.00107
AFIX 137
H27A  2    0.578400    0.124442    0.855300    11.00000   -1.50000
H27B  2    0.504490    0.114036    0.801043    11.00000   -1.50000
H27C  2    0.536027    0.266014    0.826582    11.00000   -1.50000
AFIX   0
GE1   3    0.270873    0.277499    0.607234    11.00000    0.01534    0.01112 =
         0.01551   -0.00091    0.00740   -0.00050
GE2   3    0.536392    0.252165    0.673977    11.00000    0.01472    0.01217 =
         0.01459   -0.00018    0.00544   -0.00041
O1    4    0.250656    0.044347    0.674802    11.00000    0.02135    0.02315 =
         0.03129    0.01072    0.00917    0.00244
SI1   5    0.347516    0.414997    0.687507    11.00000    0.01832    0.01223 =
         0.01919   -0.00372    0.00889   -0.00119
SI2   5    0.464624    0.458420    0.675957    11.00000    0.01783    0.01094 =
         0.01855   -0.00110    0.00742   -0.00135
SI3   5    0.457333    0.059133    0.631044    11.00000    0.01619    0.01157 =
         0.01734   -0.00225    0.00755    0.00033
SI4   5    0.343765    0.125221    0.564238    11.00000    0.01700    0.01662 =
         0.01574   -0.00425    0.00671   -0.00023
SI5   5    0.182788    0.402637    0.529991    11.00000    0.02461    0.01875 =
         0.02125    0.00561    0.00700    0.00217
SI6   5    0.620437    0.312163    0.620813    11.00000    0.01680    0.02519 =
         0.02306    0.00117    0.00967   -0.00204
SI7   5    0.607858    0.176185    0.768276    11.00000    0.02233    0.02205 =
         0.01792    0.00180    0.00056   -0.00008
HKLF 4

REM  AT356 in P2(1)/n
REM R1 =  0.0262 for    7346 Fo > 4sig(Fo)  and  0.0407 for all    9026 data
REM    354 parameters refined using      0 restraints

END

WGHT      0.0248      1.3707

REM No hydrogen bonds found for HTAB generation

REM Highest difference peak  0.417,  deepest hole -0.324,  1-sigma level  0.063
Q1    1   0.2433  0.3032  0.5702  11.00000  0.05    0.42
Q2    1   0.2288  0.3359  0.5766  11.00000  0.05    0.38
Q3    1   0.1613  0.1249  0.6424  11.00000  0.05    0.35
Q4    1   0.4009  0.0813  0.6004  11.00000  0.05    0.34
Q5    1   0.4976  0.1650  0.6494  11.00000  0.05    0.34
Q6    1   0.6626  0.2378  0.6279  11.00000  0.05    0.33
Q7    1   0.4024  0.4339  0.6745  11.00000  0.05    0.32
Q8    1   0.1037 -0.0237  0.5961  11.00000  0.05    0.31
Q9    1   0.6369  0.4132  0.6423  11.00000  0.05    0.30
Q10   1   0.0653  0.2577  0.6516  11.00000  0.05    0.30
Q11   1   0.6546  0.2211  0.7858  11.00000  0.05    0.30
Q12   1   0.4239  0.4114  0.7018  11.00000  0.05    0.30
Q13   1   0.6458  0.2531  0.7824  11.00000  0.05    0.29
Q14   1   0.3034  0.3744  0.6408  11.00000  0.05    0.29
Q15   1   0.5672  0.1692  0.7826  11.00000  0.05    0.29
Q16   1  -0.0584  0.1525  0.6032  11.00000  0.05    0.29
Q17   1   0.6367  0.0941  0.7620  11.00000  0.05    0.29
Q18   1   0.5796  0.2393  0.7135  11.00000  0.05    0.28
Q19   1   0.5803  0.1867  0.6978  11.00000  0.05    0.28
Q20   1   0.5954  0.3125  0.5795  11.00000  0.05    0.28
;
_shelx_res_checksum   20921

_shelx_hkl_file
;
   0   1   0   -1.10    0.80
   0   1   0    0.60    0.90
   0  -1   0   -1.70    0.70
   0  -1   0   -1.10    0.60
   0   2   0  563.04   17.80
   0   2   0  568.94   16.30
   0   2   0  548.15   17.30
   0   2   0  544.45   17.80
   0   2   0  572.94   17.80
   0  -2   0  567.34   17.90
   0  -2   0  559.84   17.80
   0  -2   0  551.74   17.00
   0  -2   0  563.44   17.30
   0   3   0    2.30    2.30
   0   3   0   -1.60    3.00
   0   3   0   -2.30    3.00
   0   3   0    3.60    3.00
   0   3   0   -2.80    2.70
   0  -3   0   -1.50    2.90
   0  -3   0   -3.50    2.30
   0  -3   0   -0.50    2.30
   0  -3   0   -2.10    3.20
   0   4   0 1037.70   33.10
   0   4   0  939.21   33.80
   0   4   0 1038.10   32.50
   0   4   0 1084.39   31.00
   0   4   0 1027.40   32.90
   0   4   0 1057.09   33.00
   0  -4   0 1070.29   33.30
   0  -4   0 1038.50   31.10
   0  -4   0 1066.59   31.60
   0  -4   0 1029.00   33.00
   0   5   0   -0.90    3.90
   0   5   0    3.60    4.10
   0   5   0    2.10    4.00
   0   5   0    0.60    3.60
   0  -5   0    3.60    4.10
   0  -5   0    2.10    2.80
   0  -5   0    0.50    3.00
   0  -5   0    4.30    4.40
   0   6   0  874.41   32.20
   0   6   0  970.00   30.10
   0   6   0  919.41   32.60
   0   6   0  928.61   32.20
   0   6   0  924.11   32.40
   0  -6   0  938.51   27.00
   0  -6   0  929.51   32.90
   0  -6   0  933.71   29.20
   0  -6   0  922.81   28.90
   0  -6   0  881.91   32.30
   0  -6   0  913.51   26.80
   0   7   0    8.60    5.70
   0   7   0   -2.80    5.10
   0   7   0   -1.50    6.00
   0   7   0    6.00    5.50
   0   7   0   -3.90    5.40
   0  -7   0    1.40    6.10
   0  -7   0    3.90    2.30
   0  -7   0    3.30    5.70
   0  -7   0   -0.50    2.10
   0   8   0    3.40    6.10
   0   8   0   -2.30    5.50
   0   8   0    4.60    6.40
   0   8   0   -3.00    6.60
   0  -8   0   -8.80    6.80
   0  -8   0    3.50    6.70
   0   9   0    8.70    7.40
   0   9   0   -5.60    5.90
   0  -9   0   -3.80    7.10
   0  -9   0   -0.50    7.00
   0  10   0  144.79   17.50
   0 -10   0  146.49   16.50
   0 -10   0  185.18   17.30
   0  11   0   -2.10    8.50
   0 -11   0   -0.70    8.80
   0 -11   0    2.70    8.60
   0 -12   0   10.30    9.90
   0 -12   0   18.80   10.50
   1 -12   0   28.90   11.30
   1 -12   0   33.90   11.60
   1 -11   0    2.10    8.50
   1 -11   0    0.30    8.70
  -1  11   0    0.90    9.30
   1 -10   0   -9.00    7.70
   1 -10   0    0.00    7.50
  -1  10   0   -2.00    8.50
   1  -9   0    9.40    7.20
   1  -9   0   -6.60    7.30
  -1   9   0    9.50    7.80
  -1   9   0    0.20    6.20
   1  -8   0  562.14   25.50
   1  -8   0  515.15   25.60
  -1   8   0  554.94   23.50
  -1   8   0  569.44   25.90
  -1   8   0  523.05   25.10
  -1   8   0  538.35   25.20
   1  -7   0   22.10    3.00
   1  -7   0   24.10    7.80
   1  -7   0   28.00    3.40
   1  -7   0   20.80    7.20
   1  -7   0   31.50    4.90
  -1   7   0   21.80    6.50
  -1   7   0   30.90    8.10
  -1   7   0   38.00    8.00
  -1   7   0   38.30    7.00
  -1   7   0   16.00    6.80
   1  -6   0  178.38    9.70
   1  -6   0  171.28   12.70
   1  -6   0  167.88    9.70
   1  -6   0  179.28   12.90
   1  -6   0  171.78    7.60
  -1   6   0  176.58   12.70
  -1   6   0  180.78   12.40
  -1   6   0  179.48   11.10
  -1   6   0  184.98   12.90
  -1   6   0  175.58   12.70
   1  -5   0   39.40    4.30
   1  -5   0   39.20    5.70
   1  -5   0   32.60    5.90
   1  -5   0   43.40    5.80
   1  -5   0   24.40    5.40
  -1   5   0   37.80    5.90
  -1   5   0   38.20    5.20
  -1   5   0   38.50    5.90
  -1   5   0   53.69    6.60
  -1   5   0   38.70    5.90
  -1   5   0   39.60    6.60
   1  -4   0   84.99    4.90
   1  -4   0  100.89    8.20
   1  -4   0   84.89    7.90
   1  -4   0   72.89    6.00
   1  -4   0  101.39    6.60
  -1   4   0   94.09    7.80
  -1   4   0   83.79    8.30
  -1   4   0   89.39    6.20
  -1   4   0   97.79    7.90
  -1   4   0   86.59    8.10
  -1   4   0   88.89    7.80
  -1   4   0   87.19    6.50
   1  -3   0    5.80    3.30
   1  -3   0   18.30    4.20
   1  -3   0   16.70    3.20
   1  -3   0   13.80    2.30
   1  -3   0   13.70    3.00
  -1   3   0   15.20    3.50
  -1   3   0   11.30    2.80
  -1   3   0   14.10    3.80
  -1   3   0   14.40    3.60
  -1   3   0   15.10    4.50
  -1   3   0    8.90    2.90
  -1   3   0   12.80    3.80
   1  -2   0  215.08    9.40
   1  -2   0  246.28    9.00
   1  -2   0  234.38    7.80
   1  -2   0  225.18    9.40
   1  -2   0  227.78    8.60
  -1   2   0  206.38    9.40
  -1   2   0  223.68    8.10
  -1   2   0  222.68    9.20
  -1   2   0  228.88    9.30
  -1   2   0  228.08    8.90
  -1   2   0  222.98    9.40
  -1   2   0  229.38    8.00
   1  -1   0   76.29    3.70
   1  -1   0   60.89    2.80
   1  -1   0   73.79    3.40
  -1   1   0   76.89    3.70
  -1   1   0   74.29    3.20
  -1   1   0   78.49    3.20
  -1   1   0   80.49    4.00
  -1   1   0   76.89    3.20
   1   1   0   79.99    3.20
   1   1   0   85.29    3.40
  -1  -1   0   74.59    3.60
  -1  -1   0   69.49    3.20
   1   2   0  226.58    8.90
   1   2   0  232.08    8.80
   1   2   0  230.28    8.70
   1   2   0  238.98    7.40
   1   2   0  212.68    8.80
  -1  -2   0  222.98    8.50
  -1  -2   0  222.98    9.00
  -1  -2   0  221.58    8.10
  -1  -2   0  211.48    9.00
  -1  -2   0  230.98    7.60
   1   3   0   10.60    3.20
   1   3   0   19.10    2.80
   1   3   0    7.80    3.00
   1   3   0    5.80    2.90
   1   3   0   13.60    3.30
  -1  -3   0    5.80    3.30
  -1  -3   0    6.90    3.30
  -1  -3   0   15.40    2.30
  -1  -3   0   13.90    2.70
  -1  -3   0   12.20    3.00
   1   4   0   96.39    7.50
   1   4   0   77.29    5.60
   1   4   0   79.09    7.40
   1   4   0   89.59    7.40
   1   4   0   96.69    7.60
  -1  -4   0   85.69    7.50
  -1  -4   0   88.49    7.70
  -1  -4   0   76.39    5.70
  -1  -4   0   90.19    6.10
  -1  -4   0   87.09    4.80
   1   5   0   44.90    6.10
   1   5   0   30.10    5.80
   1   5   0   37.10    5.80
   1   5   0   38.30    5.60
  -1  -5   0   41.70    5.30
  -1  -5   0   37.20    6.00
  -1  -5   0   42.20    4.10
  -1  -5   0   39.50    6.10
  -1  -5   0   39.10    5.50
   1   6   0  191.28   12.40
   1   6   0  177.38   12.10
   1   6   0  183.78   12.30
   1   6   0  152.58   12.00
  -1  -6   0  194.58   10.20
  -1  -6   0  172.08    7.30
  -1  -6   0  172.58   12.50
  -1  -6   0  171.48    8.80
  -1  -6   0  166.48   12.40
   1   7   0   17.40    6.20
   1   7   0   30.00    7.20
   1   7   0   26.80    7.10
   1   7   0   29.00    6.30
   1   7   0   27.90    7.30
  -1  -7   0   23.60    2.80
  -1  -7   0   17.40    6.80
  -1  -7   0   26.60    3.60
  -1  -7   0   19.00    7.20
   1   8   0  524.15   24.50
   1   8   0  522.85   24.30
   1   8   0  569.24   25.40
   1   8   0  542.05   22.80
  -1  -8   0  495.45   24.10
  -1  -8   0  553.54   25.20
   1   9   0    1.10    5.70
   1   9   0   17.80    8.30
  -1  -9   0    2.40    7.30
  -1  -9   0    2.70    6.50
   1  10   0   -8.80    7.50
  -1 -10   0    3.40    7.70
  -1 -10   0   -2.70    8.10
   1  11   0   -7.10    8.80
  -1 -11   0    2.10    8.70
  -1 -11   0   14.40    8.80
   1  12   0    8.20   13.40
  -1 -12   0   38.00   11.60
  -1 -12   0   24.10   11.10
   2 -12   0   87.59   14.80
   2 -12   0   90.79   15.50
   2 -11   0   21.30   10.00
   2 -11   0   36.10   10.90
  -2  11   0   21.10   11.30
   2 -10   0  612.04   31.20
   2 -10   0  638.44   30.70
  -2  10   0  659.43   31.50
   2  -9   0   13.30    7.80
   2  -9   0    7.40    7.80
  -2   9   0    3.90    6.40
  -2   9   0    7.40    8.20
   2  -8   0   17.80    7.50
   2  -8   0   13.00    2.90
   2  -8   0   19.60    2.60
   2  -8   0   23.70    8.60
  -2   8   0   16.90    7.60
  -2   8   0   16.60    7.70
  -2   8   0   19.50    7.40
  -2   8   0   13.40    7.70
   2  -7   0    2.30    6.10
   2  -7   0   -0.80    6.40
   2  -7   0    2.10    2.60
   2  -7   0    4.60    4.20
  -2   7   0   10.70    6.50
  -2   7   0   -0.30    5.90
  -2   7   0    4.00    5.70
  -2   7   0    5.10    6.00
  -2   7   0    5.90    6.50
   2  -6   0   72.69    7.60
   2  -6   0   66.39    7.30
   2  -6   0   68.99    5.30
   2  -6   0   82.19   10.50
   2  -6   0   80.69   10.50
  -2   6   0   70.29   10.20
  -2   6   0   58.89    8.60
  -2   6   0   65.29    8.90
  -2   6   0   67.29    9.70
  -2   6   0   64.89    8.50
   2  -5   0   13.10    3.10
   2  -5   0   13.20    3.80
   2  -5   0   20.50    5.60
   2  -5   0   21.80    5.90
   2  -5   0   23.80    4.40
  -2   5   0   19.50    5.80
  -2   5   0   21.80    6.60
  -2   5   0   16.90    4.30
  -2   5   0   16.10    5.00
  -2   5   0    9.00    4.50
  -2   5   0   10.90    4.70
  -2   5   0   14.10    4.40
   2  -4   0  223.28   10.30
   2  -4   0  223.68   12.10
   2  -4   0  220.38   10.20
   2  -4   0  225.58    9.10
   2  -4   0  210.58   11.60
  -2   4   0  240.98   10.30
  -2   4   0  235.38   11.90
  -2   4   0  206.68   12.00
  -2   4   0  235.28   11.40
  -2   4   0  226.28   11.60
  -2   4   0  228.58   11.00
  -2   4   0  232.88    9.90
   2  -3   0  759.02   23.80
   2  -3   0  723.13   24.90
   2  -3   0  744.13   24.50
   2  -3   0  725.53   22.60
   2  -3   0  741.03   23.50
  -2   3   0  767.02   24.90
  -2   3   0  748.03   23.40
  -2   3   0  755.82   24.50
  -2   3   0  762.12   23.10
  -2   3   0  726.93   24.80
  -2   3   0  765.62   24.20
  -2   3   0  739.73   22.80
   2  -2   0   30.40    4.60
   2  -2   0   22.90    3.30
   2  -2   0   31.30    4.40
   2  -2   0   21.80    3.70
   2  -2   0   29.00    3.90
   2  -2   0   30.60    4.30
   2  -2   0   26.60    3.30
  -2   2   0   28.90    4.40
  -2   2   0   26.00    3.50
  -2   2   0   34.90    4.30
  -2   2   0   31.60    5.20
  -2   2   0   19.90    3.60
  -2   2   0   33.40    4.90
  -2   2   0   25.30    3.80
  -2   2   0   26.60    3.90
   2  -1   0 1252.17   35.30
   2  -1   0 1269.27   35.30
   2  -1   0 1236.28   34.70
   2  -1   0 1180.38   35.60
  -2   1   0 1311.97   35.60
  -2   1   0 1233.88   35.00
  -2   1   0 1233.48   34.80
  -2   1   0 1195.68   36.00
  -2   1   0 1289.27   35.30
   2   0   0  118.39    4.40
   2   0   0  121.69    5.00
  -2   0   0  132.99    4.90
  -2   0   0  133.49    4.80
  -2   0   0  131.59    5.20
   2   1   0 1244.48   35.10
   2   1   0 1218.88   35.20
   2   1   0 1205.88   34.90
   2   1   0 1235.68   34.50
   2   1   0 1242.48   34.90
  -2  -1   0 1248.78   35.30
  -2  -1   0 1290.37   35.10
  -2  -1   0 1270.87   34.90
  -2  -1   0 1236.98   34.80
   2   2   0   29.30    4.30
   2   2   0   25.20    3.70
   2   2   0   33.80    4.50
   2   2   0   31.70    4.20
   2   2   0   25.60    3.20
  -2  -2   0   21.00    3.50
  -2  -2   0   36.10    3.90
  -2  -2   0   28.60    4.00
  -2  -2   0   33.70    4.10
  -2  -2   0   24.60    3.70
   2   3   0  768.72   23.60
   2   3   0  762.62   22.10
   2   3   0  733.73   24.00
   2   3   0  709.13   23.40
  -2  -3   0  725.23   23.90
  -2  -3   0  740.03   22.50
  -2  -3   0  735.73   22.90
  -2  -3   0  757.32   22.30
  -2  -3   0  771.72   24.20
   2   4   0  215.58   11.00
   2   4   0  206.28   10.70
   2   4   0  217.88    9.30
   2   4   0  246.78   11.10
  -2  -4   0  231.38    9.40
  -2  -4   0  237.88   11.50
  -2  -4   0  226.88    9.70
  -2  -4   0  228.78   11.20
  -2  -4   0  236.38    8.70
   2   5   0   18.30    4.90
   2   5   0   27.00    5.50
   2   5   0   14.70    4.50
   2   5   0   11.80    4.70
  -2  -5   0   16.70    5.00
  -2  -5   0   24.10    3.70
  -2  -5   0   16.80    5.00
  -2  -5   0   18.90    3.50
  -2  -5   0   18.40    3.10
   2   6   0   76.89    9.40
   2   6   0   69.79    9.90
   2   6   0   78.29    9.00
   2   6   0   60.69    9.10
  -2  -6   0   60.39    5.00
  -2  -6   0   76.79    9.80
  -2  -6   0   67.69    6.00
  -2  -6   0   66.19    9.70
   2   7   0    5.20    6.00
   2   7   0    3.10    5.40
  -2  -7   0    2.30    6.10
  -2  -7   0    4.00    2.50
  -2  -7   0    7.10    6.00
   2   8   0   14.30    7.30
   2   8   0   14.00    6.10
  -2  -8   0   16.10    8.00
  -2  -8   0   15.80    7.60
   2   9   0   12.20    6.80
   2   9   0   -2.30    7.40
  -2  -9   0   -2.90    7.20
  -2  -9   0   19.50    7.80
   2  10   0  671.33   31.60
  -2 -10   0  642.94   29.90
  -2 -10   0  664.63   30.90
   2  11   0    1.70    9.20
  -2 -11   0   32.70    9.80
  -2 -11   0    4.30    9.00
   2  12   0   79.49   15.10
  -2 -12   0   86.29   14.10
  -2 -12   0   77.59   13.60
   3 -11   0   11.20   10.10
   3 -11   0   20.40    9.90
  -3  11   0   11.40    9.20
   3 -10   0  106.99   16.20
   3 -10   0  111.99   16.70
  -3  10   0  103.79   14.40
   3  -9   0   -6.50    7.60
   3  -9   0   -4.10    6.80
  -3   9   0    2.00    7.00
  -3   9   0    0.20    7.90
   3  -8   0  308.97   19.90
   3  -8   0  287.87   10.70
   3  -8   0  297.87   19.00
  -3   8   0  232.28   17.90
  -3   8   0  262.77   18.50
  -3   8   0  262.47   17.40
  -3   8   0  284.07   19.20
   3  -7   0  189.28   14.90
   3  -7   0  213.98    9.20
   3  -7   0  178.78   15.30
   3  -7   0  196.18   11.40
  -3   7   0  183.28   15.00
  -3   7   0  187.98   14.10
  -3   7   0  188.88   15.30
  -3   7   0  189.68   14.80
  -3   7   0  172.58   15.30
   3  -6   0  269.77   13.00
   3  -6   0  273.37   13.30
   3  -6   0  308.57   16.90
   3  -6   0  276.17   11.20
   3  -6   0  266.87   15.60
  -3   6   0  250.77   15.50
  -3   6   0  316.37   16.40
  -3   6   0  298.97   14.90
  -3   6   0  247.88   15.70
  -3   6   0  232.68   15.80
   3  -5   0   53.49    6.80
   3  -5   0   59.49    8.80
   3  -5   0   63.69    9.20
   3  -5   0   72.49    5.80
   3  -5   0   72.79    7.20
  -3   5   0   74.69    8.00
  -3   5   0   62.39    9.00
  -3   5   0   39.40    6.20
  -3   5   0   56.99    7.80
  -3   5   0   59.39    8.70
  -3   5   0   43.60    7.00
  -3   5   0   61.59    7.40
   3  -4   0  111.69    9.00
   3  -4   0  142.99   10.20
   3  -4   0  124.09    7.90
   3  -4   0  117.09    6.80
   3  -4   0  123.69    8.20
  -3   4   0  104.79    9.60
  -3   4   0  108.49    8.90
  -3   4   0  111.39    8.70
  -3   4   0  138.99    7.90
  -3   4   0  111.19    7.80
  -3   4   0  131.69    9.70
  -3   4   0  124.99    8.30
   3  -3   0  132.89    7.80
   3  -3   0  138.69    9.40
   3  -3   0  143.09    7.10
   3  -3   0  144.49    8.10
   3  -3   0  118.09    6.50
   3  -3   0  128.49    8.50
  -3   3   0  135.09    8.30
  -3   3   0  126.19    8.70
  -3   3   0  133.59    6.90
  -3   3   0  139.69    7.50
  -3   3   0  133.19    8.00
  -3   3   0  129.29    8.60
  -3   3   0  133.59    6.80
   3  -2   0   12.60    3.80
   3  -2   0   12.70    3.30
   3  -2   0    8.60    3.40
   3  -2   0   13.50    2.80
   3  -2   0   14.10    4.30
   3  -2   0    2.50    3.00
   3  -2   0    5.60    3.20
  -3   2   0   12.70    3.40
  -3   2   0   10.10    4.10
  -3   2   0   13.20    3.30
  -3   2   0   10.90    3.70
  -3   2   0   12.30    4.10
  -3   2   0   18.20    4.10
  -3   2   0    7.70    3.50
   3  -1   0  120.49    5.70
   3  -1   0  134.29    7.00
   3  -1   0  137.09    6.30
   3  -1   0  126.09    6.20
  -3   1   0  126.69    7.50
  -3   1   0  133.39    6.40
  -3   1   0  133.09    6.70
  -3   1   0  128.19   10.60
  -3   1   0  117.59    6.30
   3   0   0    1.60    2.00
   3   0   0   -2.40    1.40
   3   0   0   -0.20    1.80
   3   0   0    2.20    1.90
  -3   0   0   -3.00    2.00
  -3   0   0    0.10    2.00
  -3   0   0    0.00    1.90
  -3   0   0    0.10    1.80
   3   1   0  121.19    6.20
   3   1   0  137.29    5.80
   3   1   0  127.29    5.10
   3   1   0  127.29    6.00
   3   1   0  121.39    6.20
   3   1   0  126.69    5.90
  -3  -1   0  130.19    6.50
  -3  -1   0  136.29    5.90
  -3  -1   0  123.19    5.90
  -3  -1   0  132.69    4.80
  -3  -1   0  125.49    5.30
   3   2   0    9.30    3.10
   3   2   0    9.10    2.70
   3   2   0   12.30    3.50
   3   2   0    4.20    3.00
   3   2   0   11.70    2.80
  -3  -2   0   11.60    3.00
  -3  -2   0   10.10    2.60
  -3  -2   0    5.80    2.50
  -3  -2   0    6.00    3.50
   3   3   0  136.79    7.70
   3   3   0  129.19    6.40
   3   3   0  133.39    7.10
   3   3   0  134.79    7.40
   3   3   0  127.09    7.90
  -3  -3   0  130.39    6.70
  -3  -3   0  125.99    6.50
  -3  -3   0  132.29    8.10
  -3  -3   0  129.99    6.60
  -3  -3   0  121.09    7.90
   3   4   0  114.19    7.90
   3   4   0  106.69    6.60
   3   4   0  126.09    8.50
   3   4   0  121.89    8.30
  -3  -4   0  118.49    6.50
  -3  -4   0  111.19    6.90
  -3  -4   0  111.59    8.40
  -3  -4   0  120.09    6.40
  -3  -4   0  111.99    8.50
   3   5   0   71.89    7.70
   3   5   0   68.59    8.20
   3   5   0   68.69    8.00
  -3  -5   0   68.69    5.40
  -3  -5   0   57.19    8.00
  -3  -5   0   58.09    5.60
  -3  -5   0   54.09    5.30
  -3  -5   0   48.40    6.50
   3   6   0  268.97   14.30
   3   6   0  250.57   14.80
   3   6   0  287.47   15.00
  -3  -6   0  273.37   10.80
  -3  -6   0  263.87   15.00
  -3  -6   0  261.97   15.00
  -3  -6   0  272.27   10.60
   3   7   0  187.48   14.40
   3   7   0  175.88   13.20
  -3  -7   0  181.68   14.00
  -3  -7   0  183.98    8.30
  -3  -7   0  209.28   14.50
   3   8   0  285.57   17.10
   3   8   0  264.97   17.70
  -3  -8   0  291.37   18.10
  -3  -8   0  293.07   10.10
  -3  -8   0  283.17   18.00
   3   9   0   13.60    6.80
   3   9   0    7.10    7.70
  -3  -9   0    3.40    6.60
  -3  -9   0    3.70    7.00
   3  10   0  116.39   16.50
  -3 -10   0  113.69   15.30
  -3 -10   0  111.09   15.50
   3  11   0   14.80    9.30
  -3 -11   0    2.30    8.60
  -3 -11   0   11.30    8.90
   4 -11   0   14.20   10.30
   4 -11   0   33.30   11.90
  -4  11   0   15.70   10.20
   4 -10   0  315.47   23.00
   4 -10   0  314.27   22.10
  -4  10   0  355.26   23.60
   4  -9   0  126.49   16.00
   4  -9   0  110.69   15.90
  -4   9   0  146.39   16.50
  -4   9   0  150.08   16.10
   4  -8   0   70.89   11.60
   4  -8   0   42.80    9.40
   4  -8   0   56.09    6.10
  -4   8   0   49.60    9.60
  -4   8   0   48.20    9.80
  -4   8   0   39.20   10.10
  -4   8   0   32.30    8.90
   4  -7   0  238.88   10.90
   4  -7   0  241.18   17.60
   4  -7   0  243.48   13.10
   4  -7   0  255.97   16.90
  -4   7   0  218.28   16.40
  -4   7   0  218.38   16.00
  -4   7   0  192.28   16.50
  -4   7   0  216.78   16.20
  -4   7   0  223.28   16.60
   4  -6   0  847.92   32.60
   4  -6   0  837.12   27.00
   4  -6   0  855.11   31.50
   4  -6   0  856.31   28.90
   4  -6   0  832.12   28.60
  -4   6   0  814.22   31.30
  -4   6   0  821.62   31.10
  -4   6   0  854.21   29.80
  -4   6   0  858.61   32.00
  -4   6   0  818.22   32.30
   4  -5   0  223.78   11.50
   4  -5   0  222.48   13.20
   4  -5   0  216.98   11.80
   4  -5   0  226.28   14.30
   4  -5   0  225.78   10.30
  -4   5   0  199.28   12.40
  -4   5   0  211.08   13.40
  -4   5   0  216.68   11.10
  -4   5   0  241.08   14.60
  -4   5   0  211.08   13.80
  -4   5   0  217.28   11.50
  -4   5   0  201.98   12.90
   4  -4   0 1784.92   50.19
   4  -4   0 1702.53   53.49
   4  -4   0 1703.43   52.29
   4  -4   0 1672.03   51.19
   4  -4   0 1680.93   50.89
  -4   4   0 1790.82   53.19
  -4   4   0 1805.52   53.39
  -4   4   0 1662.53   49.30
  -4   4   0 1687.83   51.69
  -4   4   0 1591.54   52.09
  -4   4   0 1738.73   50.29
  -4   4   0 1745.63   50.79
   4  -3   0 2477.35   72.59
   4  -3   0 2537.05   70.09
   4  -3   0 2449.05   70.39
   4  -3   0 2519.15   70.89
   4  -3   0 2448.96   71.39
   4  -3   0 2467.15   68.99
   4  -3   0 2354.86   68.59
  -4   3   0 2579.84   72.49
  -4   3   0 2470.45   71.49
  -4   3   0 2453.75   69.59
  -4   3   0 2365.86   69.99
  -4   3   0 2447.76   70.09
  -4   3   0 2431.46   70.79
  -4   3   0 2502.65   71.59
   4  -2   0   23.20    3.80
   4  -2   0   33.20    4.70
   4  -2   0   37.50    5.10
   4  -2   0   29.20    3.90
   4  -2   0   29.20    4.40
   4  -2   0   34.20    5.70
   4  -2   0   30.10    4.10
  -4   2   0   18.70    4.80
  -4   2   0   35.60    5.20
  -4   2   0   23.70    4.30
  -4   2   0   24.60    4.50
  -4   2   0   26.40    3.90
  -4   2   0   28.80    3.80
  -4   2   0   40.40    5.20
   4  -1   0 1197.48   34.50
   4  -1   0 1158.68   33.70
   4  -1   0 1188.48   35.40
   4  -1   0 1184.78   34.80
  -4   1   0 1209.58   34.70
  -4   1   0 1169.28   33.70
  -4   1   0  973.60   34.00
  -4   1   0 1209.08   34.20
  -4   1   0 1159.38   35.70
   4   0   0    9.10    3.00
   4   0   0   21.20    3.60
   4   0   0   13.30    3.20
   4   0   0    9.20    2.50
   4   0   0   19.40    3.70
   4   0   0   11.60    3.30
  -4   0   0   15.80    3.60
  -4   0   0    7.40    3.30
  -4   0   0   18.30    3.60
  -4   0   0    9.00    3.30
  -4   0   0   14.10    3.30
  -4   0   0   10.40    2.70
   4   1   0 1174.58   34.80
   4   1   0 1208.98   35.40
   4   1   0 1211.18   34.70
   4   1   0 1190.08   34.80
   4   1   0 1242.68   35.30
  -4  -1   0 1173.68   33.80
  -4  -1   0 1157.28   35.20
  -4  -1   0 1146.09   33.30
  -4  -1   0 1189.18   35.10
  -4  -1   0 1153.68   34.50
  -4  -1   0 1202.88   34.60
   4   2   0   28.10    4.20
   4   2   0   26.10    3.80
   4   2   0   34.50    4.90
   4   2   0   34.80    5.20
   4   2   0   23.80    3.50
  -4  -2   0   29.70    4.30
  -4  -2   0   21.20    3.60
  -4  -2   0   32.40    4.50
  -4  -2   0   26.50    3.60
   4   3   0 2456.05   69.29
   4   3   0 2428.76   69.09
   4   3   0 2377.16   69.39
   4   3   0 2430.96   69.89
   4   3   0 2469.65   68.29
  -4  -3   0 2485.15   69.99
  -4  -3   0 2424.26   68.49
  -4  -3   0 2406.16   68.19
  -4  -3   0 2465.75   68.89
   4   4   0 1720.83   51.19
   4   4   0 1710.13   51.09
   4   4   0 1702.23   49.10
   4   4   0 1725.43   50.69
   4   4   0 1702.23   49.50
  -4  -4   0 1694.53   48.50
  -4  -4   0 1658.33   49.10
  -4  -4   0 1675.03   50.99
  -4  -4   0 1700.73   49.00
  -4  -4   0 1694.63   50.99
   4   5   0  244.88   12.10
   4   5   0  226.58   12.50
   4   5   0  232.98   12.70
  -4  -5   0  234.58   12.90
  -4  -5   0  220.48    9.40
  -4  -5   0  216.88   12.70
  -4  -5   0  227.58   10.10
  -4  -5   0  231.98   10.00
   4   6   0  841.72   29.80
   4   6   0  795.72   29.80
   4   6   0  823.52   29.20
  -4  -6   0  852.21   25.30
  -4  -6   0  825.32   25.90
  -4  -6   0  809.82   30.00
  -4  -6   0  785.52   29.60
   4   7   0  189.48   13.80
   4   7   0  247.48   15.80
  -4  -7   0  224.68   15.10
  -4  -7   0  232.98   15.40
  -4  -7   0  204.68    9.70
   4   8   0   43.50    9.10
   4   8   0   71.99   10.70
  -4  -8   0   45.30    8.90
  -4  -8   0   46.40    8.90
   4   9   0  130.49   15.00
  -4  -9   0  145.89   14.90
  -4  -9   0  127.69   14.50
   4  10   0  354.76   22.80
  -4 -10   0  316.57   21.50
  -4 -10   0  339.77   21.50
   4  11   0   59.49   12.40
  -4 -11   0   52.19   11.40
  -4 -11   0   42.40   10.70
   5 -11   0   76.79   14.10
   5 -11   0   88.59   15.30
  -5  11   0   75.49   18.40
   5 -10   0  339.27   23.20
   5 -10   0  352.66   24.80
  -5  10   0  336.37   23.50
   5  -9   0   55.49   12.00
   5  -9   0   54.99   11.00
  -5   9   0   44.30   10.20
   5  -8   0   -6.60    6.60
   5  -8   0    7.10    7.30
   5  -8   0   -0.40    3.70
  -5   8   0    6.30    7.20
  -5   8   0    0.20    6.80
  -5   8   0    1.80    7.00
   5  -7   0   36.80    6.50
   5  -7   0   33.50    8.30
   5  -7   0   31.50    8.40
   5  -7   0   39.40    5.60
  -5   7   0   25.30    7.90
  -5   7   0   22.70    7.60
  -5   7   0   35.20    8.60
  -5   7   0   43.50    9.10
  -5   7   0   35.30    8.50
   5  -6   0   86.39   11.20
   5  -6   0   91.39    9.30
   5  -6   0   77.89    7.80
   5  -6   0   94.29   12.00
   5  -6   0   77.19    9.10
  -5   6   0   96.39    9.60
  -5   6   0   76.19   11.60
  -5   6   0   88.39   11.70
  -5   6   0   66.39    9.30
  -5   6   0   86.89   11.50
  -5   6   0   79.79   10.70
  -5   6   0   80.29   10.20
   5  -5   0  250.57   15.90
   5  -5   0  273.57   15.20
   5  -5   0  265.57   12.20
   5  -5   0  259.37   13.00
   5  -5   0  267.47   13.40
  -5   5   0  248.98   15.60
  -5   5   0  257.67   14.70
  -5   5   0  249.08   12.90
  -5   5   0  261.97   15.00
  -5   5   0  253.27   15.60
  -5   5   0  249.38   14.10
  -5   5   0  261.17   11.90
   5  -4   0  987.70   33.50
   5  -4   0 1040.70   34.90
   5  -4   0 1080.29   33.00
   5  -4   0 1008.60   33.20
   5  -4   0 1102.79   36.70
   5  -4   0 1034.10   31.20
  -5   4   0 1053.69   33.40
  -5   4   0 1071.99   35.10
  -5   4   0 1023.20   35.10
  -5   4   0 1065.09   35.90
  -5   4   0 1011.70   32.60
  -5   4   0 1042.50   34.30
  -5   4   0 1000.50   32.60
   5  -3   0    3.50    2.60
   5  -3   0   -3.80    3.20
   5  -3   0   -0.80    3.20
   5  -3   0    0.30    4.20
   5  -3   0    7.20    3.30
   5  -3   0    1.70    3.10
   5  -3   0    1.80    3.70
  -5   3   0   -2.30    3.40
  -5   3   0   -1.20    3.40
  -5   3   0    0.20    3.50
  -5   3   0    1.80    3.30
  -5   3   0    2.60    3.40
  -5   3   0    2.50    3.90
  -5   3   0    4.20    4.90
   5  -2   0    3.80    3.40
   5  -2   0    3.30    3.70
   5  -2   0    5.70    4.10
   5  -2   0    3.30    2.90
   5  -2   0    4.10    3.10
   5  -2   0   -2.50    3.00
  -5   2   0    4.40    3.90
  -5   2   0    6.10    3.60
  -5   2   0   -0.30    2.90
  -5   2   0    2.80    3.70
  -5   2   0    1.40    3.20
  -5   2   0    2.50    3.60
  -5   2   0    0.30    3.60
   5  -1   0    2.20    3.50
   5  -1   0    2.60    3.40
   5  -1   0    0.80    2.80
   5  -1   0    3.60    2.80
   5  -1   0   -0.50    3.60
   5  -1   0    0.60    2.50
   5  -1   0   -2.50    2.80
  -5   1   0    2.50    3.40
  -5   1   0    0.50    3.10
  -5   1   0    5.40    3.00
  -5   1   0    0.60    3.50
  -5   1   0    6.10    4.00
  -5   1   0   -1.50    2.10
  -5   1   0    0.90    2.70
   5   0   0    2.20    3.70
   5   0   0   -2.80    3.50
   5   0   0   -2.90    3.00
   5   0   0   -2.60    3.40
   5   0   0    0.70    2.90
   5   0   0   -3.70    3.50
   5   0   0    1.70    3.20
  -5   0   0    2.20    3.30
  -5   0   0   -3.90    3.00
  -5   0   0   -1.10    2.80
  -5   0   0   -5.60    3.70
  -5   0   0    1.00    3.60
  -5   0   0    3.30    3.60
   5   1   0    3.10    3.70
   5   1   0   -1.50    3.00
   5   1   0    0.10    3.40
   5   1   0    0.00    2.80
   5   1   0    2.80    3.00
  -5  -1   0    0.80    3.20
  -5  -1   0    3.20    3.20
  -5  -1   0    4.30    3.80
  -5  -1   0    0.10    2.80
  -5  -1   0    3.60    2.40
  -5  -1   0    2.80    2.90
   5   2   0    2.70    2.80
   5   2   0    2.70    2.80
   5   2   0    3.50    3.20
   5   2   0    2.30    3.40
   5   2   0    1.50    3.00
  -5  -2   0    5.10    2.80
  -5  -2   0    6.10    3.60
  -5  -2   0    6.70    2.70
  -5  -2   0    6.80    3.10
   5   3   0    1.30    3.30
   5   3   0   -2.30    2.60
   5   3   0   -1.10    3.10
   5   3   0    0.40    2.80
   5   3   0   -3.30    3.10
  -5  -3   0   -0.60    2.60
  -5  -3   0    3.20    2.60
  -5  -3   0    0.60    3.10
  -5  -3   0   -1.10    3.50
   5   4   0 1062.39   33.00
   5   4   0 1039.80   32.50
   5   4   0 1011.60   33.00
   5   4   0  993.90   33.40
  -5  -4   0 1047.70   33.60
  -5  -4   0 1033.60   33.60
  -5  -4   0 1011.90   31.30
  -5  -4   0 1042.30   31.00
  -5  -4   0 1042.30   32.10
   5   5   0  275.07   13.80
   5   5   0  274.97   14.00
   5   5   0  273.07   13.40
  -5  -5   0  242.98   14.00
  -5  -5   0  279.17   11.80
  -5  -5   0  252.87   10.40
  -5  -5   0  246.88   10.90
  -5  -5   0  257.47   13.90
   5   6   0   69.49    9.50
   5   6   0   84.49   10.20
   5   6   0   71.69    8.80
  -5  -6   0   71.89   10.60
  -5  -6   0   74.89    9.30
  -5  -6   0   69.39   10.20
  -5  -6   0   80.89    7.20
   5   7   0   32.40    7.90
   5   7   0   38.70    8.00
  -5  -7   0   34.20    7.80
  -5  -7   0   35.30    5.00
  -5  -7   0   36.00    8.10
   5   8   0    2.80    6.20
   5   8   0   11.00    7.00
  -5  -8   0    2.80    6.40
  -5  -8   0  -10.90    6.10
   5   9   0   68.29   10.70
   5   9   0   51.29   10.10
  -5  -9   0   49.99    9.80
  -5  -9   0   42.00    9.40
   5  10   0  341.27   22.40
  -5 -10   0  344.07   22.00
  -5 -10   0  321.57   21.30
   5  11   0   99.29   14.80
  -5 -11   0   64.99   12.00
  -5 -11   0   65.09   11.90
   6 -11   0   55.79   13.30
   6 -10   0   27.10   10.70
   6 -10   0   14.90    9.90
  -6  10   0   18.90    9.50
   6  -9   0   68.99   12.70
   6  -9   0   70.19   11.50
   6  -9   0   79.49    8.20
  -6   9   0   55.19   10.80
   6  -8   0   60.19    7.80
   6  -8   0   61.99   10.30
   6  -8   0   62.79   11.60
  -6   8   0   69.59   13.90
  -6   8   0   66.39   10.50
  -6   8   0   60.69   11.00
   6  -7   0  774.72   26.90
   6  -7   0  826.92   34.30
   6  -7   0  780.32   31.80
   6  -7   0  771.12   28.60
  -6   7   0  779.72   31.70
  -6   7   0  735.73   32.60
  -6   7   0  765.42   30.60
  -6   7   0  801.82   32.50
  -6   7   0  735.83   32.60
   6  -6   0  136.09   11.10
   6  -6   0  132.89   10.00
   6  -6   0  130.79   13.00
   6  -6   0  118.59   14.30
   6  -6   0  119.79   10.70
  -6   6   0  148.99   14.40
  -6   6   0  118.89   11.90
  -6   6   0  154.48   13.40
  -6   6   0  114.19   13.60
  -6   6   0  137.79   13.60
  -6   6   0  129.69   10.00
  -6   6   0  142.09   13.80
   6  -5   0   37.20    5.90
   6  -5   0   26.80    5.40
   6  -5   0   28.70    5.80
   6  -5   0   36.20    7.40
   6  -5   0   26.20    4.30
   6  -5   0   22.70    7.20
  -6   5   0   28.00    6.80
  -6   5   0   25.60    5.70
  -6   5   0   30.70    7.00
  -6   5   0   36.20    7.20
  -6   5   0   18.00    6.20
  -6   5   0   19.00    6.90
   6  -4   0  618.84   22.40
   6  -4   0  603.64   19.80
   6  -4   0  600.14   22.40
   6  -4   0  629.34   23.10
   6  -4   0  640.74   24.40
   6  -4   0  613.34   20.70
   6  -4   0  643.14   25.80
  -6   4   0  627.34   22.00
  -6   4   0  593.74   24.10
  -6   4   0  626.94   23.00
  -6   4   0  616.74   24.40
  -6   4   0  618.84   23.40
  -6   4   0  587.94   24.80
   6  -3   0   -5.00    4.10
   6  -3   0    0.90    3.50
   6  -3   0    8.70    3.90
   6  -3   0    0.30    2.50
   6  -3   0   -0.30    4.20
   6  -3   0   -0.90    3.80
   6  -3   0   -1.40    3.10
  -6   3   0   -1.90    3.60
  -6   3   0   -2.80    4.00
  -6   3   0    0.50    3.20
  -6   3   0   -1.60    3.50
  -6   3   0   -2.20    4.90
  -6   3   0    5.20    4.70
   6  -2   0  331.57   13.70
   6  -2   0  340.57   14.10
   6  -2   0  342.17   15.60
   6  -2   0  349.96   14.80
   6  -2   0  363.46   14.80
  -6   2   0  345.37   14.30
  -6   2   0  353.26   14.50
  -6   2   0  337.07   14.80
  -6   2   0  353.66   15.90
  -6   2   0  338.57   16.20
  -6   2   0  336.77   13.50
   6  -1   0  242.68   11.10
   6  -1   0  261.37   11.50
   6  -1   0  263.77   12.80
   6  -1   0  241.38   11.60
   6  -1   0  221.78   11.90
  -6   1   0  232.28   11.10
  -6   1   0  262.77   12.90
  -6   1   0  229.18   11.40
   6   0   0  164.78    9.60
   6   0   0  130.39    8.60
   6   0   0  119.89    8.20
   6   0   0  131.59    8.60
   6   0   0  132.79    8.60
   6   0   0  141.99    9.00
  -6   0   0  124.39    8.70
  -6   0   0  136.39    8.30
  -6   0   0  136.89    9.10
  -6   0   0  131.59    7.20
  -6   0   0  123.69    8.50
   6   1   0  234.08   11.00
   6   1   0  232.18   11.10
   6   1   0  251.07   11.10
   6   1   0  236.58   11.40
   6   1   0  233.08   11.70
  -6  -1   0  227.18    9.00
  -6  -1   0  230.58   10.70
  -6  -1   0  258.47   10.80
  -6  -1   0  255.97   11.90
  -6  -1   0  238.28   10.30
   6   2   0  356.66   13.60
   6   2   0  345.37   14.10
   6   2   0  326.07   13.60
   6   2   0  331.37   13.40
   6   2   0  322.97   14.10
  -6  -2   0  344.27   14.40
  -6  -2   0  332.17   13.00
  -6  -2   0  335.17   12.90
   6   3   0    4.70    3.90
   6   3   0    1.70    3.00
   6   3   0    3.10    3.40
   6   3   0   -0.60    3.30
   6   3   0    3.90    3.20
  -6  -3   0   -2.10    2.60
  -6  -3   0    0.60    2.60
  -6  -3   0    1.50    3.80
   6   4   0  576.74   21.30
   6   4   0  596.94   21.40
   6   4   0  580.84   22.00
   6   4   0  592.84   21.80
  -6  -4   0  603.54   19.50
  -6  -4   0  585.54   19.70
  -6  -4   0  587.54   22.30
   6   5   0   21.30    5.10
   6   5   0   31.40    6.10
   6   5   0   24.90    5.30
   6   5   0   23.50    5.70
  -6  -5   0   26.20    6.10
  -6  -5   0   25.80    4.10
  -6  -5   0   22.40    6.00
  -6  -5   0   26.50    3.80
   6   6   0  124.09   12.10
   6   6   0  140.69   11.80
   6   6   0  136.89   11.10
  -6  -6   0  128.29   11.90
  -6  -6   0  124.79   12.40
   6   7   0  791.72   30.00
   6   7   0  755.02   29.20
  -6  -7   0  724.53   29.40
  -6  -7   0  735.53   29.80
   6   8   0   83.89   11.80
   6   8   0   69.29   10.50
  -6  -8   0   58.49   10.00
  -6  -8   0   64.49   10.30
   6   9   0  107.09   13.30
   6   9   0   73.09   11.40
  -6  -9   0   72.39   11.30
  -6  -9   0   67.19   10.90
   6  10   0   18.60    8.90
  -6 -10   0   24.00    9.20
  -6 -10   0    4.40    8.60
   6  11   0   38.00   11.60
  -6 -11   0   52.59   11.50
  -6 -11   0   48.80   11.10
   7 -11   0  204.88   21.40
   7 -10   0   25.80   10.70
   7 -10   0   35.90   10.90
  -7  10   0   25.20    9.90
   7  -9   0  299.07   21.70
   7  -9   0  336.57   15.40
   7  -9   0  369.56   24.30
  -7   9   0  296.97   21.90
   7  -8   0  119.39   14.70
   7  -8   0  110.69   15.50
   7  -8   0  104.79   10.00
  -7   8   0  118.69   15.50
  -7   8   0  107.49   14.90
   7  -7   0    6.70    8.20
   7  -7   0    2.00    5.00
   7  -7   0    3.20    6.70
   7  -7   0    4.60    5.10
  -7   7   0    2.50    8.30
  -7   7   0   13.60    7.70
  -7   7   0   -0.20    6.90
  -7   7   0   -0.30    7.40
  -7   7   0   -2.80    6.60
   7  -6   0   36.00    6.50
   7  -6   0   40.90    9.70
   7  -6   0   39.20    8.40
   7  -6   0   36.70    8.40
   7  -6   0   29.20    6.80
  -7   6   0   26.90    8.10
  -7   6   0   33.00    8.20
  -7   6   0   21.70    8.40
  -7   6   0   19.40    7.80
  -7   6   0   31.60    7.40
  -7   6   0   19.30    8.10
   7  -5   0  112.29   12.90
   7  -5   0   99.69    9.80
   7  -5   0  100.69    8.40
   7  -5   0   94.89   10.00
   7  -5   0   86.09   11.30
   7  -5   0  104.89    9.70
  -7   5   0  121.49   12.30
  -7   5   0   96.79   11.40
  -7   5   0   77.19   11.70
  -7   5   0   79.39   12.20
  -7   5   0  118.89   10.90
  -7   5   0   98.69   12.00
   7  -4   0  259.77   10.80
   7  -4   0  292.37   14.80
   7  -4   0  279.67   13.00
   7  -4   0  297.87   14.50
   7  -4   0  272.67   16.50
   7  -4   0  298.37   16.10
   7  -4   0  298.27   14.30
  -7   4   0  279.57   15.10
  -7   4   0  283.97   17.00
  -7   4   0  290.97   15.10
  -7   4   0  297.37   13.90
  -7   4   0  309.87   16.10
  -7   4   0  285.37   16.00
   7  -3   0  131.69   10.00
   7  -3   0  117.69   10.50
   7  -3   0  137.09    9.00
   7  -3   0  129.39    7.00
   7  -3   0  120.69    9.60
   7  -3   0  125.99    9.30
   7  -3   0  126.59   11.10
  -7   3   0  118.09   10.90
  -7   3   0  125.39   10.50
  -7   3   0  149.49   12.40
  -7   3   0  109.29    9.60
  -7   3   0  136.29    9.10
  -7   3   0  129.79   10.40
   7  -2   0    3.60    4.30
   7  -2   0    1.70    3.70
   7  -2   0    3.90    3.50
   7  -2   0    3.90    4.20
   7  -2   0   -0.80    0.90
   7  -2   0   -0.40    1.70
  -7   2   0   -0.80    4.20
  -7   2   0    0.90    3.40
  -7   2   0   -4.80    4.50
  -7   2   0    6.00    4.50
  -7   2   0   -0.20    3.60
  -7   2   0   -3.70    3.40
   7  -1   0   37.10    6.00
   7  -1   0   39.30    6.30
   7  -1   0   50.59    6.50
   7  -1   0   52.39    7.00
   7  -1   0   46.50    6.80
   7  -1   0   36.30    6.00
  -7   1   0   40.40    5.30
  -7   1   0   37.50    5.30
  -7   1   0   35.00    6.50
   7   0   0   -4.90    3.20
   7   0   0   -3.90    2.90
   7   0   0   -3.80    3.20
   7   0   0    7.90    3.80
   7   0   0   -0.10    2.90
   7   0   0    1.20    4.10
  -7   0   0   -0.20    3.90
  -7   0   0    7.70    3.80
  -7   0   0   -6.30    3.10
  -7   0   0    0.10    3.00
  -7   0   0   -3.10    3.50
   7   1   0   40.40    5.50
   7   1   0   42.90    5.80
   7   1   0   53.79    7.20
   7   1   0   53.29    7.00
   7   1   0   44.60    6.60
  -7  -1   0   41.50    6.10
  -7  -1   0   46.90    4.90
  -7  -1   0   48.20    6.40
  -7  -1   0   27.00    5.10
  -7  -1   0   45.00    5.00
   7   2   0    3.60    3.10
   7   2   0   -2.60    3.80
   7   2   0    0.40    3.30
   7   2   0   -1.10    3.70
   7   2   0    1.70    3.80
  -7  -2   0    2.30    2.90
  -7  -2   0    0.50    2.10
  -7  -2   0   -0.60    3.00
  -7  -2   0    3.50    4.10
  -7  -2   0   -0.80    1.70
   7   3   0  117.89    9.10
   7   3   0  133.29    8.80
   7   3   0  122.69    8.60
   7   3   0  127.69    9.30
   7   3   0  114.89    9.60
  -7  -3   0  126.39    8.00
  -7  -3   0  138.99   10.40
   7   4   0  299.17   13.80
   7   4   0  278.17   14.30
   7   4   0  290.27   14.20
   7   4   0  307.37   14.50
  -7  -4   0  286.27   14.90
  -7  -4   0  274.57   12.00
  -7  -4   0  279.67   11.80
   7   5   0   99.89   10.20
   7   5   0  109.69    9.80
   7   5   0   85.09    9.90
   7   5   0  112.79    9.90
  -7  -5   0   92.89   10.70
  -7  -5   0  112.19   11.40
  -7  -5   0  114.39    7.50
   7   6   0   25.90    6.90
   7   6   0   31.70    6.70
  -7  -6   0   32.50    7.50
  -7  -6   0   45.00    8.50
   7   7   0   -2.20    5.00
   7   7   0   12.70    6.60
  -7  -7   0    2.70    6.80
  -7  -7   0    5.10    6.70
   7   8   0   80.59   10.70
   7   8   0  106.09   12.50
  -7  -8   0   89.29   13.50
  -7  -8   0  105.19   13.60
   7   9   0  279.57   20.30
   7   9   0  339.27   20.20
  -7  -9   0  327.37   20.30
  -7  -9   0  304.27   20.10
   7  10   0   36.00   10.10
  -7 -10   0   26.80    9.80
  -7 -10   0   17.90    8.90
   7  11   0  192.48   20.70
  -7 -11   0  219.98   19.50
  -7 -11   0  183.08   19.00
   8 -11   0   14.40   11.30
   8 -10   0   13.80    9.80
  -8  10   0    8.40   13.80
   8  -9   0  159.08   18.40
   8  -9   0  138.19   18.10
   8  -9   0  160.28   11.90
  -8   9   0  157.58   18.40
   8  -8   0   19.20    6.20
   8  -8   0    1.60    7.70
   8  -8   0   10.50    7.90
  -8   8   0    8.30    8.30
   8  -7   0  831.52   35.70
   8  -7   0  724.43   32.80
   8  -7   0  814.32   30.70
   8  -7   0  822.32   29.70
  -8   7   0  817.02   34.30
  -8   7   0  797.62   35.40
  -8   7   0  872.71   35.50
  -8   7   0  801.82   31.50
  -8   7   0  796.02   33.20
  -8   7   0  789.72   32.50
   8  -6   0  124.69   14.90
   8  -6   0  104.89   10.80
   8  -6   0  135.89   14.30
   8  -6   0  127.59   12.00
  -8   6   0  108.39   12.40
  -8   6   0   83.39   11.60
  -8   6   0   92.89   13.50
  -8   6   0  100.49   13.90
  -8   6   0  102.29   11.90
  -8   6   0  112.79   14.40
   8  -5   0  348.37   15.20
   8  -5   0  351.36   17.90
   8  -5   0  366.86   20.80
   8  -5   0  380.66   17.40
   8  -5   0  362.46   17.30
   8  -5   0  385.46   19.90
  -8   5   0  343.77   19.50
  -8   5   0  352.56   19.80
  -8   5   0  344.87   19.00
  -8   5   0  365.16   21.00
  -8   5   0  350.96   17.40
  -8   5   0  341.37   18.70
   8  -4   0   51.89    8.40
   8  -4   0   55.49    8.20
   8  -4   0   50.29    6.40
   8  -4   0   54.79    8.30
   8  -4   0   47.20    5.30
   8  -4   0   52.99    7.50
   8  -4   0   76.69    9.40
  -8   4   0   50.29    7.10
  -8   4   0   76.99   11.70
  -8   4   0   51.29    7.70
  -8   4   0   65.19    9.70
  -8   4   0   40.40    7.80
  -8   4   0   48.90    7.60
   8  -3   0 3052.09   87.29
   8  -3   0 2981.30   87.79
   8  -3   0 3134.29   89.69
   8  -3   0 3065.49   87.99
   8  -3   0 2990.00   89.69
   8  -3   0 2889.81   85.49
  -8   3   0 2986.50   86.69
  -8   3   0 2868.11   85.59
  -8   3   0 2915.11   87.29
  -8   3   0 3059.59   88.29
  -8   3   0 3028.30   89.39
  -8   3   0 2998.10   89.99
   8  -2   0  236.08   12.60
   8  -2   0  230.58   13.30
   8  -2   0  250.67   12.20
   8  -2   0  230.28   13.90
  -8   2   0  237.08   12.80
  -8   2   0  246.48   15.00
  -8   2   0  237.98   14.90
  -8   2   0  239.88   13.00
  -8   2   0  255.87   13.50
   8  -1   0  140.99    9.90
   8  -1   0  133.49    9.60
   8  -1   0  140.49   10.60
   8  -1   0  168.18   11.40
   8  -1   0  126.09   10.30
   8  -1   0  153.88    9.80
  -8   1   0  138.49    8.60
  -8   1   0  130.29   11.10
  -8   1   0  145.09    9.90
  -8   1   0  124.19    9.40
   8   0   0  454.65   19.70
   8   0   0  501.35   19.30
   8   0   0  482.35   19.80
   8   0   0  500.45   20.30
   8   0   0  499.05   19.30
   8   0   0  473.15   18.70
  -8   0   0  498.35   19.10
  -8   0   0  469.05   19.70
  -8   0   0  492.65   18.40
  -8   0   0  510.05   18.90
  -8   0   0  473.75   17.00
   8   1   0  141.79   10.10
   8   1   0  137.79    9.60
   8   1   0  147.09   10.50
   8   1   0  150.18    9.90
   8   1   0  130.39   10.00
  -8  -1   0  137.09   10.50
  -8  -1   0  136.09    7.40
  -8  -1   0  144.39    9.20
  -8  -1   0  134.89    8.70
  -8  -1   0  136.99    9.20
   8   2   0  252.87   13.30
   8   2   0  240.18   12.50
   8   2   0  247.28   13.00
   8   2   0  236.38   12.20
   8   2   0  250.67   12.60
  -8  -2   0  220.58   13.10
  -8  -2   0  206.28   11.20
  -8  -2   0  237.88    8.40
  -8  -2   0  241.08    8.90
  -8  -2   0  228.08   11.30
   8   3   0 3059.89   85.29
   8   3   0 3010.70   85.49
   8   3   0 2944.91   85.79
   8   3   0 2992.00   86.39
   8   3   0 2953.40   86.29
  -8  -3   0 2900.91   86.29
  -8  -3   0 2849.11   84.09
  -8  -3   0 2940.11   83.89
   8   4   0   51.29    7.40
   8   4   0   61.09    8.50
   8   4   0   41.00    6.00
   8   4   0   46.70    6.80
  -8  -4   0   68.39    9.80
  -8  -4   0   55.59    6.40
  -8  -4   0   56.19    6.50
   8   5   0  383.26   17.70
   8   5   0  378.66   18.20
   8   5   0  382.06   18.40
   8   5   0  359.26   17.20
  -8  -5   0  370.86   18.90
  -8  -5   0  375.76   14.50
   8   6   0  108.69   12.40
   8   6   0  118.99   11.20
   8   6   0  118.29   11.40
  -8  -6   0  104.49   12.10
  -8  -6   0  111.89   13.60
   8   7   0  820.02   31.80
   8   7   0  779.92   30.60
  -8  -7   0  766.52   31.20
  -8  -7   0  800.92   31.50
   8   8   0    4.90    6.70
   8   8   0   32.50    7.90
  -8  -8   0    9.30    7.20
  -8  -8   0   14.00    8.10
   8   9   0  145.69   16.60
  -8  -9   0  167.88   16.90
  -8  -9   0  138.99   15.80
   8  10   0   22.90    9.60
  -8 -10   0   17.60    9.40
  -8 -10   0    5.10    8.30
   8  11   0   16.90   10.50
  -8 -11   0   24.00   10.40
  -8 -11   0   11.60    9.50
   9 -11   0   90.59   15.90
   9 -10   0    0.10    9.20
   9  -9   0  133.99   12.30
   9  -9   0  139.09   17.80
   9  -9   0  141.39   18.70
  -9   9   0  131.39   17.80
   9  -8   0   43.00    7.60
   9  -8   0   24.50    9.30
   9  -8   0   22.80    9.00
  -9   8   0   27.50    9.40
   9  -7   0   77.39   11.00
   9  -7   0   85.59   12.80
   9  -7   0  123.69   14.60
   9  -7   0  100.79   11.40
  -9   7   0   94.29   12.00
  -9   7   0   83.69   12.50
  -9   7   0   93.79   13.80
  -9   7   0   70.69   14.10
  -9   7   0  119.19   15.40
  -9   7   0   63.79   11.50
   9  -6   0    6.10    6.80
   9  -6   0   14.00    6.20
   9  -6   0   10.80    8.50
   9  -6   0   18.20    5.30
   9  -6   0   12.50    6.40
  -9   6   0   10.50    7.40
  -9   6   0    0.20    8.30
  -9   6   0   14.70    8.70
  -9   6   0   14.10    8.80
  -9   6   0   12.30    7.40
  -9   6   0   21.50    8.00
   9  -5   0    5.00    7.30
   9  -5   0    6.20    5.50
   9  -5   0   -3.30    6.80
   9  -5   0   -1.00    5.60
   9  -5   0    2.80    5.30
   9  -5   0    8.00    5.60
  -9   5   0  -10.70    6.00
  -9   5   0    8.70    6.80
  -9   5   0   -7.60    6.00
  -9   5   0    1.40    7.20
  -9   5   0    0.10    7.60
  -9   5   0   -1.10    6.70
   9  -4   0   15.70    6.00
   9  -4   0    7.10    5.80
   9  -4   0   20.30    7.30
   9  -4   0    8.00    5.30
   9  -4   0    8.30    5.20
   9  -4   0    6.70    6.20
   9  -4   0   14.10    3.80
  -9   4   0   12.10    5.90
  -9   4   0    3.00    7.00
  -9   4   0   16.20    7.10
  -9   4   0    5.30    5.70
  -9   4   0   11.90    6.30
  -9   4   0   15.90    6.80
   9  -3   0  444.26   19.20
   9  -3   0  463.35   21.30
   9  -3   0  436.56   18.10
   9  -3   0  427.06   19.80
   9  -3   0  449.46   19.90
   9  -3   0  413.36   20.50
  -9   3   0  424.66   19.40
  -9   3   0  490.25   22.10
  -9   3   0  415.56   18.10
  -9   3   0  449.06   19.80
  -9   3   0  458.85   20.30
  -9   3   0  444.06   22.00
   9  -2   0    2.80    3.80
   9  -2   0    2.00    2.00
   9  -2   0   11.50    5.40
   9  -2   0    7.50    5.10
   9  -2   0   12.60    4.60
   9  -2   0    5.50    5.90
  -9   2   0    8.50    5.40
  -9   2   0    0.90    1.70
  -9   2   0    4.70    4.20
  -9   2   0    2.50    5.70
  -9   2   0    7.30    6.10
  -9   2   0    9.70    4.90
   9  -1   0   78.99    9.00
   9  -1   0   64.09    9.40
   9  -1   0   60.39    8.60
   9  -1   0   56.19    7.80
   9  -1   0   63.89    9.00
   9  -1   0   51.09    7.80
  -9   1   0   84.19    9.30
  -9   1   0   89.99   10.30
  -9   1   0   57.19    8.50
  -9   1   0   64.29    7.50
  -9   1   0   68.89    8.60
   9   0   0   -2.10    4.10
   9   0   0   -4.00    3.80
   9   0   0   -2.00    4.10
   9   0   0   -2.80    3.70
   9   0   0    1.20    4.50
   9   0   0    3.80    4.40
  -9   0   0   10.30    5.20
  -9   0   0   -6.60    3.80
  -9   0   0    4.30    4.20
  -9   0   0    3.00    4.80
  -9   0   0   -1.90    3.50
   9   1   0   56.09    8.30
   9   1   0   66.69    8.40
   9   1   0   58.59    8.40
   9   1   0   41.90    7.00
   9   1   0   68.59    8.80
  -9  -1   0   70.69    7.80
  -9  -1   0   66.09    8.00
  -9  -1   0   72.49    8.30
  -9  -1   0   64.59    9.30
  -9  -1   0   64.29    6.20
   9   2   0    5.60    4.70
   9   2   0    1.00    4.60
   9   2   0    7.30    4.60
   9   2   0    0.40    4.10
   9   2   0    2.90    3.70
  -9  -2   0    9.00    4.10
  -9  -2   0    4.20    4.00
  -9  -2   0    4.60    2.50
  -9  -2   0    5.20    5.30
  -9  -2   0    2.50    2.90
   9   3   0  416.36   19.20
   9   3   0  439.76   18.30
   9   3   0  440.36   18.50
   9   3   0  435.26   19.20
   9   3   0  436.36   18.90
  -9  -3   0  429.96   19.50
  -9  -3   0  435.86   16.90
  -9  -3   0  424.06   17.00
   9   4   0    8.40    4.60
   9   4   0   14.50    6.10
   9   4   0    8.30    5.40
   9   4   0   15.20    5.80
  -9  -4   0   16.00    6.50
  -9  -4   0    9.80    4.00
  -9  -4   0   10.80    4.50
   9   5   0   -0.30    5.10
   9   5   0    6.80    5.60
   9   5   0    2.70    4.70
   9   5   0   -4.30    5.40
  -9  -5   0  -11.40    5.80
  -9  -5   0   -4.10    3.50
   9   6   0   12.60    5.80
   9   6   0   10.80    6.40
   9   6   0    9.70    6.40
  -9  -6   0   25.30    7.60
  -9  -6   0   16.80    7.90
   9   7   0   86.69   11.40
   9   7   0   93.29   12.70
  -9  -7   0   84.29   11.40
  -9  -7   0   64.89    9.90
   9   8   0   32.90    8.40
   9   8   0   23.50    7.50
  -9  -8   0   31.30    9.00
  -9  -8   0   24.10    8.90
   9   9   0  114.59   16.00
  -9  -9   0  141.09   16.10
  -9  -9   0  126.49   15.70
   9  10   0  -18.60    6.90
  -9 -10   0   25.40   10.10
  -9 -10   0  -16.90    7.60
   9  11   0   88.69   14.40
  -9 -11   0   74.79   13.20
  -9 -11   0   78.19   13.20
  10 -10   0   82.99   14.70
  10  -9   0   55.09    8.80
  10  -9   0   59.29   12.20
 -10   9   0   36.50   10.80
  10  -8   0   86.19   13.50
  10  -8   0  110.79   16.10
  10  -8   0   97.79   12.00
 -10   8   0  108.99   16.20
  10  -7   0   81.19   12.40
  10  -7   0   77.49   10.10
  10  -7   0   57.09    9.20
  10  -7   0   88.89   13.90
 -10   7   0   54.69   10.70
 -10   7   0   73.69   12.30
 -10   7   0   64.09   13.70
 -10   7   0   84.19   13.90
  10  -6   0  363.96   19.30
  10  -6   0  299.97   21.70
  10  -6   0  372.16   21.70
  10  -6   0  340.37   15.40
  10  -6   0  329.87   18.80
 -10   6   0  336.47   20.80
 -10   6   0  329.57   19.30
 -10   6   0  386.06   21.90
 -10   6   0  326.77   21.40
 -10   6   0  278.07   21.80
 -10   6   0  351.46   22.00
  10  -5   0  175.88   13.80
  10  -5   0  195.98   17.00
  10  -5   0  196.88   16.70
  10  -5   0  174.48   14.50
  10  -5   0  200.28    8.30
  10  -5   0  188.28   14.20
  10  -5   0  192.58   13.10
 -10   5   0  184.98   17.70
 -10   5   0  193.98   16.70
 -10   5   0  180.88   16.40
 -10   5   0  196.68   14.80
 -10   5   0  180.48   15.60
 -10   5   0  177.18   16.80
  10  -4   0  155.08   13.30
  10  -4   0  190.58   12.80
  10  -4   0  164.08   13.30
  10  -4   0  169.28   12.90
  10  -4   0  190.18    9.20
  10  -4   0  189.88   15.60
  10  -4   0  173.58   15.50
 -10   4   0  165.28   15.80
 -10   4   0  168.48   14.10
 -10   4   0  158.98   16.60
 -10   4   0  177.68   14.60
 -10   4   0  175.48   15.20
 -10   4   0  172.28   13.40
  10  -3   0  288.47   17.80
  10  -3   0  312.17   16.80
  10  -3   0  301.87   16.20
  10  -3   0  298.67   15.40
  10  -3   0  313.47   17.40
 -10   3   0  321.57   19.40
 -10   3   0  308.37   19.10
 -10   3   0  319.37   17.40
 -10   3   0  302.37   15.50
 -10   3   0  318.37   16.80
 -10   3   0  309.57   17.00
  10  -2   0    4.00    5.70
  10  -2   0    6.40    4.90
  10  -2   0    5.80    4.00
  10  -2   0    0.40    5.60
  10  -2   0    9.90    5.60
 -10   2   0   -1.70    5.80
 -10   2   0    6.80    6.10
 -10   2   0    9.60    5.70
 -10   2   0    3.60    5.20
 -10   2   0    1.00    3.50
  10  -1   0   -0.90    4.90
  10  -1   0    3.00    5.80
  10  -1   0    1.90    4.50
  10  -1   0    6.50    5.10
  10  -1   0    4.40    5.00
  10  -1   0    2.40    4.00
 -10   1   0   12.60    5.30
 -10   1   0    7.10    5.00
 -10   1   0    8.50    5.20
 -10   1   0    2.90    4.30
 -10   1   0   -4.30    4.70
  10   0   0  740.33   27.10
  10   0   0  740.23   27.30
  10   0   0  676.43   26.10
  10   0   0  741.13   28.00
  10   0   0  740.93   28.80
  10   0   0  724.63   28.30
 -10   0   0  731.43   26.50
 -10   0   0  724.63   28.00
 -10   0   0  696.03   24.20
 -10   0   0  721.83   26.40
 -10   0   0  741.83   25.90
  10   1   0    6.30    4.90
  10   1   0    4.00    4.50
  10   1   0    9.20    5.00
  10   1   0    8.30    6.00
  10   1   0    2.30    4.50
 -10  -1   0    0.40    5.40
 -10  -1   0    6.40    4.40
 -10  -1   0    4.00    4.70
 -10  -1   0    0.90    4.30
 -10  -1   0    5.10    3.50
  10   2   0   11.80    6.40
  10   2   0    3.90    4.60
  10   2   0   -5.60    4.50
  10   2   0    8.70    4.30
  10   2   0    6.00    4.90
 -10  -2   0    2.90    4.20
 -10  -2   0    4.90    4.30
 -10  -2   0    1.30    5.60
 -10  -2   0    2.40    2.80
 -10  -2   0    2.80    3.30
  10   3   0  313.47   18.30
  10   3   0  332.87   16.10
  10   3   0  336.17   17.10
  10   3   0  321.57   16.70
  10   3   0  330.87   17.80
 -10  -3   0  321.77   14.80
 -10  -3   0  327.37   14.70
 -10  -3   0  304.97   17.40
  10   4   0  192.98   13.90
  10   4   0  182.58   13.30
  10   4   0  161.28   14.10
  10   4   0  180.98   12.80
 -10  -4   0  185.98   10.90
 -10  -4   0  191.28   15.00
  10   5   0  189.38   13.30
  10   5   0  150.08   13.70
  10   5   0  214.48   14.60
  10   5   0  174.58   13.80
 -10  -5   0  174.28   15.30
  10   6   0  323.77   18.80
  10   6   0  316.27   18.20
  10   6   0  314.27   17.80
 -10  -6   0  333.77   19.30
 -10  -6   0  351.96   20.20
  10   7   0   72.29    9.90
  10   7   0   66.29    9.80
 -10  -7   0   71.79   10.50
 -10  -7   0   53.79   10.40
  10   8   0  113.49   14.00
  10   8   0   99.29   14.60
 -10  -8   0   99.59   14.60
 -10  -8   0  117.29   15.00
  10   9   0   56.09   11.00
 -10  -9   0   73.69   12.50
 -10  -9   0   54.49   11.00
  10  10   0   77.59   13.50
 -10 -10   0   78.49   12.80
 -10 -10   0   65.09   12.30
  11 -10   0   -0.10   10.20
  11  -9   0  111.39   13.60
  11  -9   0  118.59   16.10
  11  -8   0   51.59    9.50
  11  -8   0   64.19   12.50
  11  -8   0   90.49   13.50
 -11   8   0   90.59   14.20
  11  -7   0  174.98   17.70
  11  -7   0  176.08   16.60
  11  -7   0  176.38   15.20
  11  -7   0  202.28   19.20
 -11   7   0  230.98   18.90
  11  -6   0    6.20    7.30
  11  -6   0   -1.20    5.40
  11  -6   0    1.50    5.80
  11  -6   0    3.30    7.90
  11  -6   0    4.10    6.90
 -11   6   0   -4.40    8.20
 -11   6   0  -13.10    6.50
 -11   6   0    8.00    9.00
 -11   6   0    6.60    7.40
 -11   6   0    4.20    8.50
 -11   6   0    3.00    7.60
  11  -5   0   52.69    8.00
  11  -5   0   77.29   12.00
  11  -5   0   75.19   10.60
  11  -5   0   61.19    9.60
  11  -5   0   65.09   12.10
  11  -5   0   67.69    9.50
 -11   5   0   67.89    9.40
 -11   5   0   92.29   13.40
 -11   5   0   75.79   12.30
 -11   5   0   56.49   10.10
 -11   5   0   63.49   10.50
 -11   5   0   73.79   11.50
  11  -4   0   -1.60    6.60
  11  -4   0    3.10    6.30
  11  -4   0   -3.10    5.20
  11  -4   0    3.50    4.20
  11  -4   0   -2.20    6.20
  11  -4   0    2.90    6.80
  11  -4   0   -7.70    5.00
 -11   4   0    9.00    8.90
 -11   4   0    0.80    6.60
 -11   4   0    2.60    7.50
 -11   4   0    6.10    6.60
 -11   4   0    1.50    8.00
 -11   4   0   -3.10    5.90
  11  -3   0  248.58   17.00
  11  -3   0  254.07   17.70
  11  -3   0  288.67   15.90
  11  -3   0  276.77   16.60
  11  -3   0  299.37   16.60
 -11   3   0  270.87   16.50
 -11   3   0  327.77   20.20
 -11   3   0  261.17   18.80
 -11   3   0  267.77   16.90
 -11   3   0  256.87   16.80
  11  -2   0   44.80    8.60
  11  -2   0   34.80    7.10
  11  -2   0   50.69    9.20
  11  -2   0   54.89    8.70
  11  -2   0   39.30    7.10
 -11   2   0   48.70    6.80
 -11   2   0   42.30    8.90
 -11   2   0   34.90    7.50
 -11   2   0   34.30    6.80
  11  -1   0   31.90    6.50
  11  -1   0   45.40    8.10
  11  -1   0   50.99    7.60
  11  -1   0   61.89    9.90
  11  -1   0   49.60    9.00
  11  -1   0   43.10    7.40
 -11   1   0   42.90    6.30
 -11   1   0   53.69    7.80
 -11   1   0   50.29    8.20
 -11   1   0   30.10    7.40
 -11   1   0   48.80    7.20
  11   0   0    3.00    5.30
  11   0   0    0.90    5.10
  11   0   0    4.10    6.40
  11   0   0   -3.00    5.00
  11   0   0    0.60    4.60
  11   0   0    0.50    4.50
 -11   0   0   -2.50    4.80
 -11   0   0   -1.80    5.70
 -11   0   0    3.90    5.80
 -11   0   0    6.00    5.30
 -11   0   0    2.80    4.50
  11   1   0   56.79    8.20
  11   1   0   39.40    8.70
  11   1   0   32.90    7.10
  11   1   0   47.20    7.80
  11   1   0   65.39    9.60
 -11  -1   0   47.20    7.10
 -11  -1   0   42.30    5.30
 -11  -1   0   57.59    8.80
 -11  -1   0   40.80    7.10
 -11  -1   0   37.20    6.30
  11   2   0   42.80    7.70
  11   2   0   57.99    8.30
  11   2   0   60.29    8.10
  11   2   0   57.19    9.60
  11   2   0   51.79    8.10
 -11  -2   0   50.89    5.40
 -11  -2   0   44.80    6.40
 -11  -2   0   49.60    8.30
 -11  -2   0   51.29    6.90
 -11  -2   0   63.09    8.70
  11   3   0  261.17   15.60
  11   3   0  308.27   17.10
  11   3   0  292.07   16.60
  11   3   0  251.67   16.70
 -11  -3   0  309.27   17.90
 -11  -3   0  272.37   14.40
 -11  -3   0  272.47   14.10
  11   4   0   -1.50    6.80
  11   4   0   -3.50    5.40
  11   4   0    4.00    5.70
  11   4   0    1.20    5.00
 -11  -4   0    2.30    7.10
  11   5   0   58.89    9.20
  11   5   0   62.99    8.80
  11   5   0   64.19   10.30
 -11  -5   0   66.49   10.70
  11   6   0   -2.60    6.50
  11   6   0   -0.50    6.20
  11   6   0    0.10    5.60
 -11  -6   0   12.90    8.10
  11   7   0  170.68   16.10
  11   7   0  179.68   15.50
  11   7   0  203.08   15.70
 -11  -7   0  203.68   16.50
 -11  -7   0  166.28   17.10
  11   8   0   64.59   11.40
 -11  -8   0   55.49   10.50
 -11  -8   0   82.49   12.20
  11   9   0  132.29   16.60
 -11  -9   0  108.99   14.40
 -11  -9   0  112.09   16.70
  11  10   0   16.50    9.90
 -11 -10   0    6.20    9.50
 -11 -10   0   10.50   10.40
  12 -10   0  159.38   21.80
  12  -9   0   17.10   10.10
  12  -9   0   10.80    8.10
  12  -8   0    2.10    7.40
  12  -8   0   -5.80    9.20
  12  -7   0  254.97   20.70
  12  -7   0  233.08   20.50
  12  -7   0  214.48   17.70
 -12   7   0  230.08   20.10
  12  -6   0   56.59    7.60
  12  -6   0   45.60   10.40
  12  -6   0   55.89   10.90
  12  -6   0   41.00    9.40
  12  -6   0   53.89    9.70
 -12   6   0   53.29   12.50
 -12   6   0   33.30   10.50
 -12   6   0   45.90   10.30
 -12   6   0   57.39   10.80
 -12   6   0   57.39   13.20
  12  -5   0  159.28   16.80
  12  -5   0  153.38   16.30
  12  -5   0  168.38   14.20
  12  -5   0  153.98   14.90
  12  -5   0  175.78   14.10
  12  -5   0  137.39   15.30
 -12   5   0  167.98   17.90
 -12   5   0  149.88   18.50
 -12   5   0  153.38   16.80
 -12   5   0  171.48   17.50
 -12   5   0  151.38   14.90
 -12   5   0  167.38   16.20
  12  -4   0  363.56   21.80
  12  -4   0  334.07   19.20
  12  -4   0  352.26   14.60
  12  -4   0  384.36   21.50
  12  -4   0  327.07   18.30
  12  -4   0  366.86   20.20
  12  -4   0  327.97   21.40
 -12   4   0  326.97   20.60
 -12   4   0  332.07   18.70
 -12   4   0  352.86   20.90
 -12   4   0  383.66   24.10
 -12   4   0  367.26   23.20
 -12   4   0  323.17   19.70
  12  -3   0  379.86   19.30
  12  -3   0  346.07   18.50
  12  -3   0  334.87   19.20
  12  -3   0  328.67   20.60
  12  -3   0  347.97   20.80
 -12   3   0  334.47   22.00
 -12   3   0  345.87   19.30
 -12   3   0  367.26   20.30
 -12   3   0  344.87   19.90
 -12   3   0  326.87   21.30
  12  -2   0  440.36   22.60
  12  -2   0  444.26   21.70
  12  -2   0  492.75   23.80
  12  -2   0  500.25   22.50
  12  -2   0  406.36   22.60
 -12   2   0  398.76   20.70
 -12   2   0  450.45   22.00
 -12   2   0  445.06   24.50
 -12   2   0  464.65   20.10
  12  -1   0 1463.65   50.19
  12  -1   0 1654.93   52.39
  12  -1   0 1549.54   52.99
  12  -1   0 1644.44   53.69
  12  -1   0 1487.25   51.09
  12  -1   0 1564.74   53.29
 -12   1   0 1567.04   51.39
 -12   1   0 1586.14   51.09
 -12   1   0 1506.65   48.10
 -12   1   0 1487.95   49.50
 -12   1   0 1695.93   54.19
  12   0   0  794.62   31.80
  12   0   0  760.92   29.80
  12   0   0  780.12   30.70
  12   0   0  783.82   32.10
  12   0   0  825.82   30.80
  12   0   0  813.22   31.80
 -12   0   0  771.02   29.00
 -12   0   0  767.52   27.00
 -12   0   0  766.92   29.50
 -12   0   0  785.02   29.60
 -12   0   0  840.62   32.40
  12   1   0 1530.65   52.39
  12   1   0 1649.33   51.09
  12   1   0 1529.65   52.89
  12   1   0 1613.94   51.89
  12   1   0 1587.94   51.89
  12   1   0 1497.75   52.39
 -12  -1   0 1594.94   48.00
 -12  -1   0 1538.55   49.90
 -12  -1   0 1527.85   52.19
 -12  -1   0 1560.14   46.70
 -12  -1   0 1645.44   50.39
  12   2   0  449.86   21.50
  12   2   0  418.76   22.70
  12   2   0  447.26   21.90
  12   2   0  451.65   21.80
  12   2   0  464.45   21.40
 -12  -2   0  439.86   19.40
 -12  -2   0  442.06   15.60
 -12  -2   0  448.26   22.70
 -12  -2   0  465.35   20.00
 -12  -2   0  446.36   15.00
  12   3   0  365.96   19.40
  12   3   0  318.97   19.10
  12   3   0  337.37   18.20
  12   3   0  312.87   19.70
 -12  -3   0  369.76   16.80
 -12  -3   0  352.36   20.40
  12   4   0  338.27   18.60
  12   4   0  337.57   19.70
  12   4   0  354.06   19.80
  12   4   0  334.87   20.40
 -12  -4   0  373.86   21.30
  12   5   0  171.48   15.80
  12   5   0  144.79   14.70
  12   5   0  152.78   13.50
 -12  -5   0  188.88   16.90
  12   6   0   68.29   10.70
  12   6   0   60.69   10.30
  12   6   0   66.59    9.80
 -12  -6   0   53.69   10.90
  12   7   0  234.28   17.60
  12   7   0  225.98   18.40
  12   7   0  236.18   17.20
 -12  -7   0  241.28   18.90
 -12  -7   0  231.88   18.20
  12   8   0    3.80    7.50
 -12  -8   0    7.00    9.20
 -12  -8   0    5.10    8.10
  12   9   0    8.00    8.10
 -12  -9   0   -2.70    8.60
 -12  -9   0    8.80    9.20
  12  10   0  162.68   19.50
 -12 -10   0  153.48   18.80
 -12 -10   0  166.08   18.90
  13  -9   0   22.00   11.60
  13  -9   0   24.00    9.30
  13  -8   0   -3.10    7.70
  13  -8   0   -3.00    8.80
  13  -7   0  287.07   13.80
  13  -7   0  304.57   20.40
  13  -7   0  256.07   21.90
 -13   7   0  265.27   24.50
  13  -6   0   -0.20    6.00
  13  -6   0    3.30    8.50
  13  -6   0    1.00    8.00
  13  -6   0   -8.20    6.70
 -13   6   0   -5.50    7.00
 -13   6   0   17.10   10.00
  13  -5   0   41.60    8.40
  13  -5   0   37.00   10.10
  13  -5   0   20.60    8.50
  13  -5   0   53.99    9.40
  13  -5   0   20.80    9.90
  13  -5   0   29.90    8.20
 -13   5   0   18.80    9.70
 -13   5   0   17.80    8.30
 -13   5   0   39.10    9.90
 -13   5   0   23.70    8.20
 -13   5   0   34.70   10.50
 -13   5   0   22.10   10.30
  13  -4   0   19.80    7.00
  13  -4   0   35.20   10.30
  13  -4   0   32.30    8.50
  13  -4   0   31.40    6.20
  13  -4   0   30.90    7.70
  13  -4   0   22.30    9.30
 -13   4   0   23.30    8.40
 -13   4   0   37.50   10.40
 -13   4   0   21.50   10.10
 -13   4   0   16.80   10.40
 -13   4   0   28.10    8.90
  13  -3   0   14.20    7.60
  13  -3   0   17.80    6.80
  13  -3   0   14.90    8.90
  13  -3   0   23.30    9.00
  13  -3   0   13.90    8.20
 -13   3   0   29.00    9.10
 -13   3   0   14.60    8.80
 -13   3   0   13.00    9.40
 -13   3   0   19.50    7.70
 -13   3   0   19.20    8.40
  13  -2   0   52.29    8.90
  13  -2   0   50.29    8.80
  13  -2   0   62.69   10.70
  13  -2   0   59.39   10.60
  13  -2   0   69.09   10.90
 -13   2   0   31.30    9.70
 -13   2   0   68.59   10.40
 -13   2   0   60.69    9.60
 -13   2   0   62.09    9.50
 -13   2   0   68.19    9.00
  13  -1   0   28.70    7.40
  13  -1   0   21.70    7.70
  13  -1   0   19.90    7.60
  13  -1   0   20.70    7.00
  13  -1   0   18.30    7.90
  13  -1   0   29.60    8.50
 -13   1   0    4.50    7.60
 -13   1   0   22.80    7.70
 -13   1   0   36.60    8.50
 -13   1   0    7.90    6.30
 -13   1   0   18.50    6.70
  13   0   0   14.20    7.00
  13   0   0   -2.30    7.20
  13   0   0    6.10    6.70
  13   0   0   -2.80    6.10
  13   0   0   -3.30    5.40
  13   0   0   -7.70    5.00
 -13   0   0    4.50    5.60
 -13   0   0   -0.20    5.40
 -13   0   0   10.40    6.10
 -13   0   0    0.90    7.00
 -13   0   0    2.40    6.90
  13   1   0   17.70    8.10
  13   1   0   18.50    7.10
  13   1   0   18.40    7.40
  13   1   0   29.70    8.10
  13   1   0   12.70    6.10
  13   1   0   19.20    7.90
 -13  -1   0   21.40    8.20
 -13  -1   0   16.10    6.00
 -13  -1   0   17.90    6.50
 -13  -1   0   18.40    5.40
 -13  -1   0   13.50    6.50
  13   2   0   68.79    9.40
  13   2   0   52.09    9.10
  13   2   0   62.79   10.90
  13   2   0   83.09   11.30
  13   2   0   51.29    8.80
 -13  -2   0   60.49    6.70
 -13  -2   0   63.89    6.20
 -13  -2   0   64.09    8.10
 -13  -2   0   46.90    9.70
  13   3   0   24.80    7.80
  13   3   0    8.50    7.80
  13   3   0   12.70    6.60
  13   3   0   18.70    7.20
 -13  -3   0   15.90    5.60
 -13  -3   0   27.90    9.20
  13   4   0   32.10    9.80
  13   4   0   30.60    8.00
  13   4   0   21.50    7.90
  13   4   0   36.40    8.20
 -13  -4   0   28.60    9.20
  13   5   0   24.60    7.60
  13   5   0   41.80    9.90
  13   5   0   32.00    8.50
 -13  -5   0   39.60    9.90
  13   6   0    5.20    6.20
  13   6   0    3.60    7.10
  13   6   0   19.20    8.50
 -13  -6   0    9.90    8.60
  13   7   0  285.57   20.50
  13   7   0  318.67   20.70
 -13  -7   0  298.97   20.70
 -13  -7   0  282.77   21.10
  13   8   0   -2.20    7.40
 -13  -8   0   15.40    9.70
 -13  -8   0    0.40    8.30
  13   9   0    8.00    8.90
 -13  -9   0   27.70   10.80
 -13  -9   0   33.50   10.90
  14  -9   0   13.80    9.40
  14  -8   0    6.80   10.00
  14  -8   0   -1.70    8.60
  14  -7   0   21.10    9.60
  14  -7   0   52.79   12.80
  14  -7   0   22.20    6.40
  14  -6   0  102.69   14.80
  14  -6   0   88.49   13.20
  14  -6   0   76.79    9.70
 -14   6   0   88.39   13.60
 -14   6   0   83.89   13.80
  14  -5   0   11.30    9.00
  14  -5   0   -3.90    7.90
  14  -5   0   10.10    8.10
  14  -5   0    6.30    6.80
  14  -5   0    5.80    6.70
 -14   5   0    0.60   11.20
 -14   5   0    0.60    7.50
 -14   5   0    1.30    9.70
  14  -4   0  209.78   16.90
  14  -4   0  210.58   16.20
  14  -4   0  198.58   16.00
  14  -4   0  174.28   17.90
  14  -4   0  231.48   19.20
 -14   4   0  219.98   18.40
 -14   4   0  206.98   19.60
 -14   4   0  182.88   16.50
 -14   4   0  248.88   18.90
 -14   4   0  238.38   21.60
 -14   4   0  205.38   16.80
  14  -3   0   22.60    8.40
  14  -3   0   13.10    7.00
  14  -3   0   21.10    8.70
  14  -3   0   34.40   10.30
  14  -3   0   23.40    9.40
 -14   3   0   19.90    8.40
 -14   3   0   18.00    9.40
 -14   3   0   47.50    9.40
 -14   3   0   10.10   10.30
  14  -2   0  102.59   14.60
  14  -2   0   77.39   10.80
  14  -2   0   56.89    9.90
  14  -2   0   65.69   10.80
  14  -2   0   97.19   13.70
  14  -2   0   74.19   12.20
 -14   2   0   74.09   10.20
 -14   2   0   69.79    9.70
 -14   2   0   77.99   11.20
 -14   2   0   84.99   12.70
 -14   2   0   87.59   11.70
  14  -1   0  861.71   35.70
  14  -1   0  784.72   33.00
  14  -1   0  851.41   35.80
  14  -1   0  883.21   34.40
  14  -1   0  920.91   37.10
  14  -1   0  921.91   35.50
 -14   1   0  816.02   36.40
 -14   1   0  838.42   33.50
 -14   1   0  837.52   32.50
 -14   1   0  861.41   33.70
 -14   1   0  895.11   31.30
  14   0   0  508.05   26.80
  14   0   0  582.14   26.00
  14   0   0  554.14   28.30
  14   0   0  534.35   27.40
  14   0   0  596.54   26.30
  14   0   0  562.94   26.50
 -14   0   0  575.24   22.70
 -14   0   0  597.94   25.60
 -14   0   0  564.54   24.90
 -14   0   0  587.74   24.80
 -14   0   0  576.54   28.10
  14   1   0  866.51   33.70
  14   1   0  828.82   35.10
  14   1   0  877.11   35.90
  14   1   0  869.31   34.40
  14   1   0  829.32   34.90
  14   1   0  877.51   33.20
 -14  -1   0  853.51   32.20
 -14  -1   0  835.32   28.00
 -14  -1   0  824.42   35.20
 -14  -1   0  816.52   29.10
 -14  -1   0  834.42   31.70
  14   2   0   90.59   11.30
  14   2   0   72.59   10.10
  14   2   0   65.89   10.20
  14   2   0   94.99   13.70
  14   2   0   95.09   13.30
 -14  -2   0   91.79   12.90
 -14  -2   0  113.19   11.60
  14   3   0   23.20    7.80
  14   3   0   26.30    9.20
  14   3   0   33.50    8.50
  14   3   0   41.70    9.70
 -14  -3   0   30.30   10.40
 -14  -3   0   17.70    6.20
  14   4   0  234.38   18.80
  14   4   0  186.18   16.50
  14   4   0  175.98   15.30
 -14  -4   0  211.18   18.30
  14   5   0    0.00    6.70
  14   5   0    7.50    8.20
  14   5   0   -3.70    5.70
 -14  -5   0    3.60    8.90
  14   6   0  123.09   16.30
  14   6   0  100.79   14.90
 -14  -6   0  116.59   17.00
  14   7   0   34.60    9.90
  14   7   0   28.40    9.90
 -14  -7   0   32.60   10.90
 -14  -7   0   42.60   10.50
  14   8   0   -7.40    7.20
 -14  -8   0   18.10   10.00
 -14  -8   0    5.50    9.10
  14   9   0   28.50   10.60
 -14  -9   0   35.20   11.40
 -14  -9   0   17.00   10.90
  15  -9   0   35.70   11.60
  15  -8   0   34.00   11.70
  15  -7   0  134.89   23.40
  15  -7   0  108.09   15.00
  15  -7   0   99.19   11.30
  15  -6   0  154.68   19.70
  15  -6   0  158.78   18.40
  15  -6   0  177.08   15.10
 -15   6   0  170.68   21.70
  15  -5   0   99.19   14.40
  15  -5   0  110.59   16.40
  15  -5   0   88.09   11.00
 -15   5   0  117.29   21.00
 -15   5   0  101.89   14.20
  15  -4   0    1.60    7.30
  15  -4   0   14.20    9.30
  15  -4   0   -9.40    5.80
  15  -4   0   -6.80    8.00
  15  -4   0   -5.50    6.00
 -15   4   0    7.10    9.50
 -15   4   0   -3.40    7.90
 -15   4   0   11.00   11.20
 -15   4   0   -8.90    7.60
  15  -3   0   14.80    8.50
  15  -3   0   12.40    7.30
  15  -3   0   12.30    9.20
  15  -3   0   31.00   10.70
  15  -3   0   12.80    8.20
 -15   3   0   23.80    8.20
 -15   3   0   15.60    9.40
 -15   3   0   17.90    8.40
 -15   3   0   19.10   10.50
  15  -2   0    5.10    7.10
  15  -2   0    9.10    9.20
  15  -2   0   15.70    7.00
  15  -2   0   -7.00    6.70
  15  -2   0    0.40    7.30
  15  -2   0   12.50    8.30
 -15   2   0   -3.70    7.50
 -15   2   0    9.50    7.80
 -15   2   0   12.90    9.40
 -15   2   0   12.90    7.70
 -15   2   0   11.50    9.90
  15  -1   0   -3.00    7.30
  15  -1   0   17.90    7.60
  15  -1   0    4.90    9.60
  15  -1   0   11.00    6.90
  15  -1   0    8.30    8.20
  15  -1   0    4.50    7.30
 -15   1   0    1.50   10.40
 -15   1   0   16.00    7.60
 -15   1   0    0.80    8.50
 -15   1   0   19.20    8.00
 -15   1   0   19.40    7.80
  15   0   0   11.40    8.40
  15   0   0   -2.10    7.40
  15   0   0    6.70    6.60
  15   0   0    6.40    8.70
  15   0   0    8.10    7.70
  15   0   0    2.70    6.90
 -15   0   0   -5.00    6.30
 -15   0   0   -1.20    8.50
 -15   0   0   -1.50    6.30
 -15   0   0    2.10    6.20
 -15   0   0    3.70    8.00
  15   1   0   11.60    8.00
  15   1   0   10.60    7.60
  15   1   0    0.20    8.80
  15   1   0    0.90    6.90
  15   1   0   12.80    7.30
  15   1   0   11.10    7.30
 -15  -1   0    0.40    5.50
 -15  -1   0    6.80    6.50
 -15  -1   0    5.90    6.60
 -15  -1   0    2.40    8.70
  15   2   0    3.10    7.00
  15   2   0    2.20    6.80
  15   2   0    1.40    6.40
  15   2   0    3.10    8.10
  15   2   0   11.00    7.40
  15   2   0    1.40    7.30
 -15  -2   0    2.60    5.90
 -15  -2   0   12.80    8.80
  15   3   0    9.10    7.40
  15   3   0   19.20    9.60
  15   3   0    7.80    7.70
  15   3   0   16.30    7.60
 -15  -3   0   19.00    9.20
 -15  -3   0   14.60    6.00
  15   4   0   -4.10    8.60
  15   4   0  -10.00    6.10
  15   4   0   -3.40    5.70
 -15  -4   0  -13.50    8.40
  15   5   0   96.79   13.10
  15   5   0  111.19   15.80
 -15  -5   0   98.79   13.90
  15   6   0  199.48   18.50
  15   6   0  188.78   18.30
 -15  -6   0  180.58   19.50
  15   7   0  114.29   17.10
  15   7   0  100.69   14.60
 -15  -7   0  132.79   18.10
  15   8   0   54.49   11.80
 -15  -8   0   11.10   10.70
 -15  -8   0   19.70   10.00
  15   9   0   49.20   13.30
 -15  -9   0   35.60   11.90
 -15  -9   0   46.80   11.80
  16  -8   0  185.08   21.00
  16  -7   0    7.40    6.70
  16  -7   0    5.10   10.40
  16  -6   0  190.78   16.00
  16  -6   0  169.98   19.60
  16  -5   0   76.49   14.50
  16  -5   0   77.69   11.00
  16  -5   0   79.49   14.30
 -16   5   0   89.69   14.20
  16  -4   0  150.18   19.00
  16  -4   0  223.98   17.40
  16  -4   0  162.88   19.40
 -16   4   0  169.58   18.80
 -16   4   0  176.88   18.90
  16  -3   0    4.50    8.60
  16  -3   0   14.80    8.50
  16  -3   0   17.50    8.70
  16  -3   0   -5.20    8.10
 -16   3   0    1.50   10.50
 -16   3   0   15.20    8.20
 -16   3   0    8.20    9.40
 -16   3   0   14.80    9.60
 -16   3   0    9.40    7.70
  16  -2   0  148.69   16.60
  16  -2   0  127.89   16.60
  16  -2   0  131.79   17.80
  16  -2   0  115.79   14.90
  16  -2   0  107.69   15.10
  16  -2   0  101.49   14.20
 -16   2   0   99.99   15.20
 -16   2   0  144.89   15.60
 -16   2   0  136.29   14.40
 -16   2   0  140.89   19.50
 -16   2   0  144.59   16.10
  16  -1   0   -2.40    6.80
  16  -1   0   -6.70    7.00
  16  -1   0   -6.40    8.40
  16  -1   0    5.90    7.60
  16  -1   0   -1.90    5.90
  16  -1   0   -2.50    6.60
 -16   1   0    5.90    7.00
 -16   1   0   13.70    7.40
 -16   1   0   -3.00    9.70
 -16   1   0   -9.80    6.40
 -16   1   0    4.90    8.60
  16   0   0  567.94   26.70
  16   0   0  496.65   27.60
  16   0   0  527.25   28.30
  16   0   0  547.25   30.10
  16   0   0  565.54   27.00
  16   0   0  553.94   27.60
 -16   0   0  569.74   22.80
 -16   0   0  575.44   24.70
 -16   0   0  586.04   30.20
 -16   0   0  533.95   25.30
  16   1   0   -8.30    6.60
  16   1   0    1.10    6.80
  16   1   0    2.50    7.10
  16   1   0    4.30    7.00
  16   1   0   -1.00    6.50
  16   1   0    0.80    8.10
 -16  -1   0    3.50    6.10
 -16  -1   0    5.00    5.50
 -16  -1   0   -3.60    5.60
 -16  -1   0   -0.60    9.20
  16   2   0  157.98   15.90
  16   2   0   96.29   14.60
  16   2   0  168.18   19.30
  16   2   0  132.79   14.60
  16   2   0  120.89   16.00
 -16  -2   0   90.59   13.10
 -16  -2   0  142.49   12.80
  16   3   0    9.90   10.10
  16   3   0    9.00    7.20
  16   3   0   14.40    8.30
 -16  -3   0   10.20    9.10
  16   4   0  171.28   17.70
  16   4   0  193.58   19.60
 -16  -4   0  199.38   19.60
  16   5   0   74.99   13.60
  16   5   0   89.99   13.40
 -16  -5   0  117.89   15.60
  16   6   0  163.88   19.50
  16   6   0  196.78   19.10
 -16  -6   0  167.18   20.40
  16   7   0   15.00    9.50
  16   7   0   21.80   10.80
 -16  -7   0   10.10   10.30
  16   8   0  158.78   19.50
  16   8   0  190.68   20.80
 -16  -8   0  182.18   19.70
 -16  -8   0  178.88   21.50
  17  -8   0   -8.10   10.10
  17  -7   0   28.90    8.00
  17  -7   0   33.20   12.20
  17  -6   0  151.28   19.70
  17  -6   0  145.69   15.90
  17  -5   0   75.59   11.70
  17  -5   0  106.49   16.80
 -17   5   0  106.39   15.70
  17  -4   0  114.69   16.90
  17  -4   0  126.69   16.20
 -17   4   0   91.79   14.00
  17  -3   0  104.79   13.10
  17  -3   0   75.09   14.60
 -17   3   0  110.99   20.90
 -17   3   0  126.89   17.90
 -17   3   0  115.79   15.70
  17  -2   0    3.60    6.60
  17  -2   0    2.90    9.80
 -17   2   0   17.20   10.90
 -17   2   0    9.40    9.30
 -17   2   0    9.40    8.30
  17  -1   0   23.80    9.10
  17  -1   0   15.20   11.20
 -17   1   0   27.30   12.70
 -17   1   0   17.30    7.60
 -17   1   0    9.90    9.50
  17   0   0    3.20    7.20
  17   0   0   -2.70    8.60
 -17   0   0  -10.40    9.50
 -17   0   0   -0.80    7.40
 -17   0   0   -3.20    6.10
 -17   0   0    5.40    6.60
  17   1   0   23.40    9.00
  17   1   0   33.50   12.00
 -17  -1   0    9.10    6.30
 -17  -1   0   26.90   10.70
 -17  -1   0   12.60    7.00
 -17  -1   0   21.30    5.80
  17   2   0   -1.00    9.60
  17   2   0    4.60    7.90
 -17  -2   0   12.80   10.40
  17   3   0   92.09   13.00
  17   3   0   75.19   13.70
 -17  -3   0   99.49   15.10
  17   4   0  103.39   16.00
  17   4   0  118.49   16.60
 -17  -4   0   82.49   13.80
  17   5   0   79.79   14.90
  17   5   0   75.99   13.00
 -17  -5   0  114.49   16.20
  17   6   0  158.78   20.00
  17   6   0  152.18   18.80
 -17  -6   0  111.69   16.10
  17   7   0   36.60   11.50
  17   7   0    5.40   10.10
 -17  -7   0   22.20   12.20
  17   8   0  -17.00    9.80
 -17  -8   0    7.30   10.70
 -17  -8   0    2.70   11.20
  18  -7   0   83.49   10.20
  18  -7   0   99.59   16.80
  18  -6   0   41.90   13.60
  18  -6   0   33.20    9.20
  18  -5   0   79.19   12.10
  18  -5   0   65.49   14.80
 -18   5   0   37.90   13.50
  18  -4   0   19.20   12.30
 -18   4   0    1.60   11.20
  18  -3   0  744.13   37.60
 -18   3   0  736.53   33.40
 -18   3   0  679.43   30.90
  18  -2   0   24.10   11.00
 -18   2   0   33.80    9.70
 -18   2   0   27.30   11.20
 -18   2   0    8.70   13.20
  18  -1   0   27.00   11.90
 -18   1   0   60.69   14.50
 -18   1   0   33.10    9.10
 -18   1   0   45.70   10.90
  18   0   0   -1.70    7.40
  18   0   0    6.30   10.50
 -18   0   0    9.50    7.00
 -18   0   0  -14.80    7.30
 -18   0   0   -1.20    9.40
  18   1   0   50.69   13.90
  18   1   0   41.90   10.60
 -18  -1   0   40.60    6.30
 -18  -1   0   44.20   12.10
 -18  -1   0   31.90    6.50
  18   2   0   17.60    8.90
  18   2   0    8.60   11.20
 -18  -2   0   19.90   10.90
  18   3   0  763.12   38.40
  18   3   0  771.72   36.10
 -18  -3   0  762.62   37.00
  18   4   0   13.80   11.60
  18   4   0   16.20    9.30
 -18  -4   0   12.70   11.40
  18   5   0   80.09   15.80
  18   5   0   64.19   12.60
 -18  -5   0   91.19   15.40
  18   6   0   17.40   11.90
  18   6   0   46.10   12.70
 -18  -6   0   36.10   12.90
  18   7   0   96.09   16.40
 -18  -7   0  107.59   16.30
  19  -6   0   14.20    9.20
  19  -6   0   47.60   14.10
  19  -5   0   85.69   16.60
  19  -5   0   72.59   14.90
 -19   5   0   92.09   15.90
  19  -4   0   11.60   12.00
 -19   4   0    5.60   11.60
  19  -3   0   91.79   17.20
 -19   3   0   75.29   12.30
 -19   3   0   93.09   14.50
  19  -2   0    5.70   12.20
 -19   2   0  -11.00    9.80
 -19   2   0    7.10    8.70
  19  -1   0   10.30   11.70
 -19   1   0   21.40    8.60
 -19   1   0   16.10   10.00
 -19   1   0   32.30   13.20
  19   0   0  -15.90    9.90
 -19   0   0    3.30    7.80
 -19   0   0   -3.50    6.80
 -19   0   0   -1.80   10.60
  19   1   0   -1.20   12.10
 -19  -1   0   13.40   11.50
  19   2   0   11.60   11.90
  19   2   0   -0.10    9.60
 -19  -2   0    1.50   10.50
  19   3   0   91.19   15.80
  19   3   0   90.59   16.70
 -19  -3   0   59.59   15.10
  19   4   0   -3.40   10.70
 -19  -4   0  -11.00   11.10
  19   5   0   97.89   17.30
 -19  -5   0   49.50   14.00
  19   6   0   27.00   12.60
 -19  -6   0   10.40   11.80
  20  -5   0   -6.10   11.80
 -20   5   0  -25.70   12.40
  20  -4   0   79.49   17.00
 -20   4   0   96.79   15.10
  20  -3   0    6.30   12.60
 -20   3   0    3.80   12.30
 -20   3   0   13.90   11.30
  20  -2   0  167.48   23.20
 -20   2   0  166.88   20.30
 -20   2   0  157.68   17.10
  20  -1   0    4.50   12.50
 -20   1   0    7.90    9.70
 -20   1   0   11.20    8.30
  20   0   0   16.80   12.30
 -20   0   0    4.80    7.30
 -20   0   0   15.70   14.90
 -20   0   0   12.30    7.40
  20   1   0   26.70   12.10
 -20  -1   0    4.00   11.50
  20   2   0  203.38   23.80
 -20  -2   0  201.08   24.10
  20   3   0   -7.30   10.70
 -20  -3   0    2.40   12.10
  20   4   0   69.19   16.20
 -20  -4   0  104.99   17.10
  20   5   0    7.60   12.60
 -20  -5   0    3.50   12.60
  21  -4   0   14.30   12.90
 -21   4   0  -18.30   11.70
  21  -3   0    7.00   12.90
 -21   3   0   10.10   11.80
  21  -2   0    5.90   12.90
 -21   2   0   10.60    9.60
 -21   2   0   -0.70   10.70
  21  -1   0    5.60   11.90
 -21   1   0   30.90    9.40
 -21   1   0   19.10   10.70
  21   0   0   -9.90   11.30
 -21   0   0    3.60    7.10
 -21   0   0    2.60    6.70
  21   1   0   11.50   12.90
  21   2   0   -7.40   12.10
 -21  -2   0   -3.00   11.60
  21   3   0   13.30   13.30
 -21  -3   0    5.10   12.00
  21   4   0   -0.50   11.70
 -21  -4   0    0.90   12.70
  22  -3   0  114.49   20.30
 -22   3   0   97.39   15.90
  22  -2   0   51.89   16.70
 -22   2   0   36.10   11.00
 -22   2   0   49.99   12.80
  22  -1   0  138.19   21.90
 -22   1   0  144.49   17.00
 -22   1   0  152.88   15.80
  22   0   0    8.40   14.20
  22   1   0  174.88   25.20
  22   2   0   33.50   15.40
  22   3   0   95.69   18.70
 -22  -3   0  115.29   27.60
  23   0   0   15.70   14.60
  23   1  -1  150.18   22.80
 -23   0   1  102.69   11.40
  23   0  -1   85.99   19.60
 -23   1   1  213.28   17.80
 -23   1   1  219.18   19.30
  23  -1  -1  222.08   28.00
  22   3  -1   14.20   13.10
  22   2  -1   15.00   12.80
  22   1  -1  -12.80   12.00
 -22   0   1    3.60    7.30
 -22   0   1   -4.20    7.70
  22   0  -1   -1.10   13.00
 -22   1   1   -2.00    9.00
 -22   1   1    1.70   10.10
  22  -1  -1   15.60   13.50
 -22   2   1   11.30   12.00
 -22   2   1  -11.40    9.50
  22  -2  -1    9.80   13.20
 -22   3   1    0.30   12.50
  22  -3  -1   -6.90   12.10
 -21  -5   1  -34.60   11.20
  21   5  -1    1.90   12.60
 -21  -4   1   -5.80   12.30
  21   4  -1    1.20   12.70
 -21  -3   1    0.70   12.10
  21   3  -1   -0.20   12.00
 -21  -2   1   19.50   12.70
  21   2  -1   10.30   11.70
  21   1  -1  -10.50   11.50
 -21   0   1   -1.90    7.90
 -21   0   1    4.70    7.70
  21   0  -1  -11.50   10.90
 -21   1   1    5.10   10.30
 -21   1   1   11.70    8.80
  21  -1  -1    4.90   12.70
 -21   2   1  -12.80   10.90
 -21   2   1    1.30    9.20
  21  -2  -1   -4.90   12.80
 -21   3   1   -0.50   12.40
  21  -3  -1   -4.90   12.90
 -21   4   1   23.80   13.30
  21  -4  -1    0.80   13.50
 -21   5   1   17.70   14.70
  21  -5  -1    0.20   13.10
 -20  -6   1  148.29   19.80
  20   6  -1  154.68   21.90
 -20  -5   1   12.80   12.40
  20   5  -1   10.70   13.20
 -20  -4   1  118.09   18.30
  20   4  -1  150.28   21.70
 -20  -3   1   32.20   13.70
  20   3  -1   68.79   16.40
 -20  -2   1   32.60   14.40
  20   2  -1   36.60   12.80
 -20  -1   1    4.50   12.20
 -20  -1   1    3.60    6.20
 -20  -1   1   23.10    6.40
  20   1  -1   21.60   14.20
 -20   0   1    9.90    8.70
 -20   0   1   -7.40    7.30
  20   0  -1    0.00   11.20
 -20   1   1   30.40   11.10
 -20   1   1    0.50    8.40
  20  -1  -1   16.60   11.50
 -20   2   1   60.89   13.50
 -20   2   1   57.19   11.10
  20  -2  -1   47.80   14.20
 -20   3   1   51.29   13.30
  20  -3  -1   76.89   16.40
 -20   4   1   91.49   16.20
  20  -4  -1  114.39   18.40
 -20   5   1    1.80   13.30
  20  -5  -1   24.40   10.10
  20  -5  -1   -0.20   12.40
  20  -6  -1  171.28   23.90
  20  -6  -1  110.99   16.20
 -19  -6   1   28.70   13.70
  19   6  -1   62.19   14.20
 -19  -5   1    7.50   12.10
  19   5  -1   12.50   12.00
 -19  -4   1  636.14   34.40
  19   4  -1  590.04   34.50
 -19  -3   1  -10.30   10.20
  19   3  -1   18.80   14.40
  19   3  -1    8.20   11.10
 -19  -2   1  817.52   38.90
  19   2  -1  698.73   38.30
 -19  -1   1   24.30   11.50
 -19  -1   1   15.40    7.00
 -19  -1   1    0.50    6.20
  19   1  -1   10.60   11.90
 -19   0   1   10.70    7.90
 -19   0   1   18.60    8.90
 -19   0   1   12.90   10.60
  19   0  -1   -2.50   10.60
 -19   1   1  -12.80   11.10
 -19   1   1    8.50   10.50
 -19   1   1   12.80    8.60
  19  -1  -1   26.80   12.30
 -19   2   1  761.92   34.50
 -19   2   1  784.82   32.30
  19  -2  -1  732.53   38.70
 -19   3   1    7.20   10.60
  19  -3  -1   -3.80   11.20
 -19   4   1  561.84   31.90
  19  -4  -1  596.74   34.40
 -19   5   1    1.60   12.30
  19  -5  -1    0.10   10.90
  19  -5  -1   11.20    9.10
  19  -6  -1   52.79   10.20
  19  -6  -1   53.49   14.40
 -18  -7   1   15.10   12.50
  18   7  -1    4.60   10.90
 -18  -6   1  -16.60   10.50
  18   6  -1    6.30   10.20
 -18  -5   1  101.89   16.40
  18   5  -1   78.69   13.20
  18   5  -1   99.19   16.40
 -18  -4   1   -1.90   10.30
  18   4  -1   12.40   11.80
  18   4  -1    3.40    7.90
 -18  -3   1   13.30   10.30
  18   3  -1   26.70   12.10
  18   3  -1   29.90   10.30
 -18  -2   1   20.10   11.10
  18   2  -1   24.70    9.30
  18   2  -1   24.50   12.00
 -18  -1   1   22.60    7.60
 -18  -1   1    7.90   10.40
 -18  -1   1   17.70    6.80
  18   1  -1    8.90    7.90
  18   1  -1   25.50   12.00
 -18   0   1   -5.00    6.80
 -18   0   1    0.60    8.30
 -18   0   1   -9.50    9.70
  18   0  -1  -16.00    9.20
  18   0  -1   -7.00    6.60
 -18   1   1    4.70   10.10
 -18   1   1    7.60    8.00
 -18   1   1   39.60   11.20
  18  -1  -1   13.60   12.50
  18  -1  -1    1.50    9.90
 -18   2   1   -2.30    7.90
 -18   2   1   10.50   10.10
 -18   2   1   -2.40   11.30
  18  -2  -1   14.10   10.50
 -18   3   1   12.10   10.80
 -18   3   1    4.90    9.40
  18  -3  -1    2.90   10.50
  18  -3  -1   -4.60    9.80
 -18   4   1    4.60   11.50
  18  -4  -1   13.70    8.90
  18  -4  -1   34.60   13.30
 -18   5   1   64.39   14.60
  18  -5  -1   76.59   11.50
  18  -5  -1  101.49   17.10
  18  -6  -1    8.40   11.10
  18  -6  -1   28.90    8.70
  18  -7  -1    5.00    6.30
  18  -7  -1    2.70   11.50
 -17  -8   1   70.89   14.60
 -17  -7   1   -5.80   10.50
  17   7  -1   13.70    9.90
  17   7  -1    6.90   10.50
 -17  -6   1   -3.60   10.70
  17   6  -1    6.30    8.60
  17   6  -1   11.20   10.30
 -17  -5   1   67.19   14.20
  17   5  -1   60.59   12.60
  17   5  -1   72.79   13.70
 -17  -4   1   12.10   10.80
  17   4  -1    7.90    7.90
  17   4  -1  -13.30    9.20
 -17  -3   1   50.79   12.00
  17   3  -1   35.40    9.20
  17   3  -1   66.39   13.40
 -17  -2   1    3.70    9.30
 -17  -2   1    0.30    5.70
 -17  -2   1    5.90    4.20
  17   2  -1    1.30    6.80
  17   2  -1    7.30   10.20
 -17  -1   1   30.50    7.10
 -17  -1   1   24.40    7.70
 -17  -1   1   34.40   12.10
 -17  -1   1   30.20    7.70
  17   1  -1   41.90   10.10
  17   1  -1   43.30   12.10
 -17   0   1    7.70    7.10
 -17   0   1    3.70    8.20
 -17   0   1   18.60   10.40
 -17   0   1    9.80    6.90
  17   0  -1    5.20    7.80
  17   0  -1    2.60    9.70
  17   0  -1    7.10    7.40
  17   0  -1    0.30    8.70
 -17   1   1   27.80    8.40
 -17   1   1   38.40   10.10
 -17   1   1   21.20   11.00
 -17   1   1   25.60   11.00
 -17   1   1   19.40    8.10
  17  -1  -1   35.20   11.20
  17  -1  -1   25.40    9.00
  17  -1  -1   32.50   10.70
  17  -1  -1   20.00    8.70
 -17   2   1    8.80   11.50
 -17   2   1    4.10    7.80
 -17   2   1    8.30    9.00
  17  -2  -1   13.30    9.40
  17  -2  -1    4.00    8.10
  17  -2  -1   11.90   10.70
 -17   3   1   43.30   16.30
 -17   3   1   51.19   10.30
 -17   3   1   34.30   11.70
  17  -3  -1   47.50   12.60
  17  -3  -1   52.19   10.40
  17  -3  -1   54.99   12.40
 -17   4   1   -2.90    9.90
  17  -4  -1   10.90    9.90
  17  -4  -1   -7.70    7.30
 -17   5   1   47.10   13.40
  17  -5  -1   60.19   10.50
  17  -5  -1   49.30   13.00
  17  -6  -1    9.50   10.50
  17  -6  -1   10.20    7.40
  17  -7  -1   11.30    5.80
  17  -7  -1   20.40   11.00
  17  -8  -1   92.19   15.90
 -16  -8   1  126.39   18.20
 -16  -8   1   82.59   15.10
  16   8  -1  102.09   16.40
 -16  -7   1    0.00   10.50
  16   7  -1    7.60    8.80
  16   7  -1    0.80    9.50
 -16  -6   1  108.09   15.80
  16   6  -1   94.39   13.10
  16   6  -1  109.59   15.80
 -16  -5   1    0.80    9.70
  16   5  -1    2.90    9.60
  16   5  -1    4.60    7.80
 -16  -4   1   19.30   10.50
  16   4  -1    0.20    8.60
  16   4  -1    3.50    7.70
 -16  -3   1  146.29   18.30
 -16  -3   1  182.98   13.80
  16   3  -1  171.18   16.40
  16   3  -1  160.58   17.20
  16   3  -1  138.49   16.10
 -16  -2   1    3.60    4.90
 -16  -2   1   -1.50    8.50
 -16  -2   1    7.30    4.50
 -16  -2   1   11.90    6.40
  16   2  -1    9.50    7.40
  16   2  -1    3.00    6.30
  16   2  -1    4.50    6.90
  16   2  -1   12.80   11.30
  16   2  -1   12.40    9.70
  16   2  -1   -1.20    6.50
 -16  -1   1   13.90    7.10
 -16  -1   1    1.80    6.10
 -16  -1   1   -1.70    5.90
 -16  -1   1   -1.60    8.50
  16   1  -1   11.50    8.80
  16   1  -1   10.60    7.50
  16   1  -1   23.20    7.80
  16   1  -1    9.70   10.00
  16   1  -1   10.10    7.40
  16   1  -1    7.20    7.90
 -16   0   1    3.10    7.70
 -16   0   1   -0.50    6.30
 -16   0   1   -4.90    6.60
 -16   0   1   -9.90    8.60
 -16   0   1    0.80    8.10
  16   0  -1   -5.50    7.00
  16   0  -1    6.20    6.70
  16   0  -1   -5.20    7.00
  16   0  -1    6.10    8.20
  16   0  -1    1.00    8.40
  16   0  -1    8.70    7.20
 -16   1   1   -7.80    7.00
 -16   1   1   -4.20    6.90
 -16   1   1   19.10    7.50
 -16   1   1   -1.10    8.90
 -16   1   1    0.80   10.00
  16  -1  -1   20.30    8.80
  16  -1  -1    8.60    9.70
  16  -1  -1   -4.20    5.90
  16  -1  -1   11.50    8.30
  16  -1  -1    2.00    6.40
 -16   2   1   -0.70    7.10
 -16   2   1   14.10    9.20
 -16   2   1   -0.50    7.20
 -16   2   1    9.10    7.70
 -16   2   1   -7.00    9.20
  16  -2  -1   20.50    8.60
  16  -2  -1   -1.10    8.30
  16  -2  -1   -4.10    7.60
  16  -2  -1    3.10    7.60
  16  -2  -1    3.60    7.30
 -16   3   1  141.59   19.70
 -16   3   1  161.38   17.80
 -16   3   1  157.08   17.20
 -16   3   1  175.68   16.40
  16  -3  -1  169.48   15.80
  16  -3  -1  167.58   18.50
  16  -3  -1  123.39   16.60
  16  -3  -1  134.69   15.40
  16  -3  -1  114.89   15.90
  16  -3  -1  153.18   15.50
 -16   4   1   14.00    8.70
 -16   4   1   21.90   10.70
  16  -4  -1   14.70    8.80
  16  -4  -1   -2.70    7.10
  16  -4  -1    7.00    9.90
 -16   5   1   -5.80   10.20
  16  -5  -1   11.80   10.20
  16  -5  -1    0.10    7.10
  16  -5  -1    3.90    9.40
  16  -6  -1  122.89   17.80
  16  -6  -1  112.19   12.90
  16  -6  -1   91.09   15.60
  16  -7  -1    0.70    5.20
  16  -7  -1   13.20   10.70
  16  -8  -1   92.19   14.40
 -15  -9   1   43.90   12.00
 -15  -9   1   50.19   13.00
 -15  -8   1   82.99   13.90
 -15  -8   1   73.79   13.80
  15   8  -1  116.79   15.50
 -15  -7   1    9.50   10.50
  15   7  -1   11.30    8.40
  15   7  -1   19.80    9.70
 -15  -6   1  131.49   18.70
  15   6  -1  157.48   18.00
  15   6  -1  141.89   16.90
 -15  -5   1  382.66   24.40
  15   5  -1  379.76   23.50
  15   5  -1  317.27   21.70
 -15  -4   1   86.09   13.10
  15   4  -1   98.19   14.40
  15   4  -1   73.49   13.10
  15   4  -1   75.89   11.50
 -15  -3   1   -6.20    8.70
 -15  -3   1    9.50    5.80
  15   3  -1   -1.50    5.90
  15   3  -1    6.90    7.80
  15   3  -1    2.10    6.70
  15   3  -1   -4.10    6.40
  15   3  -1    8.00    8.80
 -15  -2   1  867.91   35.90
 -15  -2   1  806.52   26.10
 -15  -2   1  797.62   27.00
 -15  -2   1  795.52   31.00
  15   2  -1  812.42   32.80
  15   2  -1  872.31   35.30
  15   2  -1  804.72   34.10
  15   2  -1  817.02   33.80
  15   2  -1  804.52   35.20
 -15  -1   1  183.08   18.20
 -15  -1   1  174.58   21.10
 -15  -1   1  163.08   14.40
 -15  -1   1  171.88   12.80
 -15  -1   1  174.18   14.50
  15   1  -1  164.78   15.00
  15   1  -1  166.98   15.80
  15   1  -1  148.19   16.10
  15   1  -1  160.08   15.80
  15   1  -1  142.69   16.30
  15   1  -1  158.88   16.10
 -15   0   1 1090.09   39.70
 -15   0   1 1129.59   37.10
 -15   0   1 1061.59   42.90
 -15   0   1 1075.49   38.90
 -15   0   1 1112.79   40.40
  15   0  -1 1145.49   41.50
  15   0  -1 1086.49   42.70
  15   0  -1 1105.19   41.60
  15   0  -1 1168.78   44.10
  15   0  -1 1029.60   39.90
  15   0  -1 1056.99   43.00
 -15   1   1  183.48   16.70
 -15   1   1  181.58   16.50
 -15   1   1  167.28   15.50
 -15   1   1  159.68   18.60
 -15   1   1  189.78   15.20
  15  -1  -1  159.98   15.00
  15  -1  -1  137.99   16.10
  15  -1  -1  178.88   16.30
  15  -1  -1  168.78   18.50
  15  -1  -1  141.49   16.10
 -15   2   1  837.22   33.20
 -15   2   1  794.32   37.20
 -15   2   1  840.02   34.70
 -15   2   1  855.21   34.60
 -15   2   1  846.32   31.50
  15  -2  -1  786.72   33.80
  15  -2  -1  757.42   35.10
  15  -2  -1  875.31   36.70
  15  -2  -1  811.42   32.70
  15  -2  -1  813.32   36.30
 -15   3   1    1.10    7.40
 -15   3   1    5.40    7.60
 -15   3   1   -8.00    8.40
 -15   3   1   15.60   10.60
  15  -3  -1    5.60    6.50
  15  -3  -1    1.40    7.40
  15  -3  -1    3.90    6.60
  15  -3  -1    1.60    7.30
  15  -3  -1    4.10    8.70
 -15   4   1   88.59   16.00
 -15   4   1   93.39   13.80
 -15   4   1  101.99   16.10
 -15   4   1   88.79   13.00
 -15   4   1   78.89   12.70
  15  -4  -1   75.99   12.60
  15  -4  -1   93.69   14.60
  15  -4  -1   64.59   10.40
  15  -4  -1   92.79   17.50
  15  -4  -1   76.99   10.40
  15  -4  -1   98.69   13.20
 -15   5   1  384.86   24.40
 -15   5   1  343.37   22.70
  15  -5  -1  359.96   23.40
  15  -5  -1  388.06   25.80
  15  -5  -1  327.47   18.90
  15  -5  -1  324.37   23.80
  15  -5  -1  361.16   16.60
  15  -6  -1  154.48   13.30
  15  -6  -1  139.09   17.90
  15  -6  -1  122.49   18.40
  15  -7  -1   12.30    5.20
  15  -7  -1   15.70    9.90
  15  -7  -1   25.70   11.30
  15  -8  -1   97.09   13.90
  15  -9  -1   42.80   12.10
 -14  -9   1  -11.20    8.20
 -14  -9   1   16.30   10.50
  14   9  -1   23.40   10.40
 -14  -8   1  121.19   17.20
 -14  -8   1  136.69   18.50
  14   8  -1  112.69   17.00
 -14  -7   1  102.29   14.10
 -14  -7   1   87.19   13.60
  14   7  -1  100.89   13.90
  14   7  -1   75.59   12.70
 -14  -6   1  279.97   21.50
  14   6  -1  293.27   20.90
  14   6  -1  269.87   19.80
 -14  -5   1   25.80    9.80
  14   5  -1   27.60    7.70
  14   5  -1   34.40    9.90
  14   5  -1   15.80    7.70
 -14  -4   1   -3.10    8.30
 -14  -4   1    2.40    5.60
  14   4  -1   19.60    7.40
  14   4  -1   -4.10    7.90
  14   4  -1    5.50    6.40
  14   4  -1   12.60    7.60
 -14  -3   1    3.50    5.60
 -14  -3   1   11.30    8.90
  14   3  -1   -0.90    8.40
  14   3  -1    4.60    7.00
  14   3  -1    0.30    7.20
  14   3  -1   13.60    7.50
  14   3  -1    4.90    6.60
 -14  -2   1  149.19   10.20
 -14  -2   1  184.48   13.50
 -14  -2   1  175.58   17.70
 -14  -2   1  164.18   11.60
  14   2  -1  177.18   15.80
  14   2  -1  162.58   17.10
  14   2  -1  180.18   16.10
  14   2  -1  176.98   15.30
  14   2  -1  169.38   15.20
 -14  -1   1   95.89   12.80
 -14  -1   1   60.19   10.60
 -14  -1   1   95.49   10.70
 -14  -1   1  100.29   12.10
 -14  -1   1   93.59   12.40
  14   1  -1   89.79   12.30
  14   1  -1  104.59   13.30
  14   1  -1  106.19   13.50
  14   1  -1   91.59   12.70
  14   1  -1  109.89   13.80
  14   1  -1  106.19   15.30
 -14   0   1   -1.80    7.90
 -14   0   1    5.80    6.70
 -14   0   1   -0.20    5.80
 -14   0   1   -0.40    7.50
 -14   0   1   -5.50    6.00
  14   0  -1    2.80    7.70
  14   0  -1   -8.70    5.30
  14   0  -1    0.50    6.90
  14   0  -1    7.80    7.50
  14   0  -1   -0.30    6.20
  14   0  -1    4.80    6.00
 -14   1   1   89.59   13.40
 -14   1   1  104.39   12.60
 -14   1   1  102.09   15.60
 -14   1   1   78.79   11.00
 -14   1   1  101.59   13.00
  14  -1  -1   95.09   12.80
  14  -1  -1  104.39   13.40
  14  -1  -1  121.99   14.40
  14  -1  -1  116.19   14.30
  14  -1  -1  105.29   12.60
 -14   2   1  163.88   14.50
 -14   2   1  122.89   17.60
 -14   2   1  218.08   16.90
 -14   2   1  206.18   17.20
  14  -2  -1  145.09   16.00
  14  -2  -1  159.98   15.00
  14  -2  -1  171.98   17.50
  14  -2  -1  160.18   16.00
  14  -2  -1  187.98   15.50
 -14   3   1   -0.40    8.50
 -14   3   1    2.30    7.00
 -14   3   1    8.60   10.00
 -14   3   1    5.40    7.10
 -14   3   1    9.00    7.10
  14  -3  -1    4.90    7.00
  14  -3  -1   -3.10    5.90
  14  -3  -1   10.10    8.80
  14  -3  -1    1.30    6.00
  14  -3  -1    6.20    7.40
 -14   4   1   -1.70    8.90
 -14   4   1   11.90    7.60
 -14   4   1   11.50    7.90
 -14   4   1   16.20   10.60
 -14   4   1    4.70    8.90
  14  -4  -1    8.50    7.30
  14  -4  -1   -9.90    5.40
  14  -4  -1    6.40    6.30
  14  -4  -1    5.20    8.60
  14  -4  -1    0.10    7.30
  14  -4  -1   18.90    8.50
 -14   5   1   34.90    9.50
 -14   5   1   16.70   10.40
 -14   5   1   31.50   11.70
 -14   5   1   19.20   10.90
  14  -5  -1   37.50   10.10
  14  -5  -1   29.10    9.60
  14  -5  -1   21.00    8.60
  14  -5  -1   28.40    5.30
  14  -5  -1   31.70    7.70
  14  -5  -1   25.30    7.80
 -14   6   1  299.07   21.20
 -14   6   1  297.77   26.40
  14  -6  -1  289.67   15.50
  14  -6  -1  256.67   21.50
  14  -6  -1  304.17   22.80
  14  -6  -1  240.58   19.50
  14  -7  -1   93.29   14.80
  14  -7  -1  117.19   16.20
  14  -8  -1  163.78   17.10
  14  -8  -1  105.39   15.80
  14  -9  -1    3.60    8.80
  14  -9  -1   16.20   11.80
 -13 -10   1   71.99   13.40
 -13 -10   1   53.89   12.70
 -13  -9   1  188.88   19.60
 -13  -9   1  147.89   18.40
  13   9  -1  149.19   18.50
 -13  -8   1    8.00    9.20
 -13  -8   1    8.60    9.50
  13   8  -1    0.10    7.90
 -13  -7   1   34.60   10.70
 -13  -7   1   36.20   10.40
  13   7  -1   33.30   10.00
  13   7  -1   31.90    9.60
 -13  -6   1    3.10    9.00
  13   6  -1   15.10    8.00
  13   6  -1    2.50    6.70
  13   6  -1    8.20    6.50
 -13  -5   1   40.70    9.90
  13   5  -1   34.50    8.40
  13   5  -1   47.60   10.10
  13   5  -1   34.20    7.90
 -13  -4   1  146.99   17.00
 -13  -4   1  137.09   11.80
  13   4  -1  158.38   16.00
  13   4  -1  136.49   14.60
  13   4  -1  110.09   13.00
  13   4  -1  123.79   14.60
 -13  -3   1  207.18   13.70
 -13  -3   1  192.88   17.20
  13   3  -1  191.88   15.00
  13   3  -1  201.08   17.10
  13   3  -1  194.78   15.80
  13   3  -1  202.48   15.60
  13   3  -1  185.68   15.80
 -13  -2   1  120.49   12.20
 -13  -2   1  131.19   15.20
 -13  -2   1  111.49    9.10
 -13  -2   1  116.99   10.30
 -13  -2   1  116.49   11.40
  13   2  -1  124.09   15.10
  13   2  -1  104.19   13.40
  13   2  -1  122.79   13.50
  13   2  -1  127.19   13.30
  13   2  -1  144.09   13.70
 -13  -1   1   88.19   11.40
 -13  -1   1   92.69   14.10
 -13  -1   1   85.79   12.10
 -13  -1   1  106.29   12.10
 -13  -1   1   83.59   10.10
  13   1  -1  120.49   12.40
  13   1  -1  112.89   12.90
  13   1  -1   92.99   12.80
  13   1  -1  131.49   13.60
  13   1  -1  116.69   13.00
  13   1  -1   98.39   12.80
 -13   0   1  309.77   18.00
 -13   0   1  305.37   15.70
 -13   0   1  298.67   18.20
 -13   0   1  324.37   17.60
 -13   0   1  297.17   19.70
  13   0  -1  304.77   18.00
  13   0  -1  347.27   18.50
  13   0  -1  311.07   19.10
  13   0  -1  281.07   19.00
  13   0  -1  293.07   18.10
 -13   1   1   99.39   12.80
 -13   1   1   75.99   11.40
 -13   1   1  100.19   13.00
 -13   1   1  105.89   13.10
 -13   1   1   86.59   11.20
  13  -1  -1   98.59   13.30
  13  -1  -1  107.19   11.90
  13  -1  -1   91.99   12.00
  13  -1  -1  111.39   13.20
  13  -1  -1  116.39   13.50
 -13   2   1  112.39   16.00
 -13   2   1  124.09   13.80
 -13   2   1  125.79   12.60
 -13   2   1  113.99   14.40
  13  -2  -1  114.69   13.00
  13  -2  -1   98.49   13.70
  13  -2  -1  132.29   15.00
  13  -2  -1  111.49   12.80
  13  -2  -1   90.89   13.30
 -13   3   1  220.28   19.40
 -13   3   1  193.38   16.30
 -13   3   1  191.18   15.60
 -13   3   1  168.58   16.30
  13  -3  -1  221.98   15.40
  13  -3  -1  181.18   16.60
  13  -3  -1  161.68   15.30
  13  -3  -1  176.68   15.20
  13  -3  -1  196.78   14.90
 -13   4   1  169.18   17.90
 -13   4   1  128.99   18.20
 -13   4   1  112.69   14.90
 -13   4   1  138.49   14.20
 -13   4   1  126.29   14.90
 -13   4   1  121.89   16.70
  13  -4  -1  128.29   13.00
  13  -4  -1  115.79   15.60
  13  -4  -1  130.89   15.80
  13  -4  -1  119.79   13.40
  13  -4  -1  143.19   10.90
  13  -4  -1  112.39   15.00
  13  -4  -1  122.89   13.60
 -13   5   1   71.39   13.60
 -13   5   1   47.50    9.10
 -13   5   1   67.89   10.10
 -13   5   1   45.00   10.70
 -13   5   1   37.50   10.10
 -13   5   1   48.80   10.70
  13  -5  -1   45.10   10.40
  13  -5  -1   43.80   10.60
  13  -5  -1   51.09   10.60
  13  -5  -1   42.60    9.10
  13  -5  -1   52.79    6.90
  13  -5  -1   50.69    8.00
 -13   6   1   -1.50    9.10
 -13   6   1   18.30    8.50
  13  -6  -1   14.10    6.10
  13  -6  -1   15.80    8.80
  13  -6  -1   11.40    8.10
  13  -6  -1    3.10    8.20
  13  -6  -1   20.00    7.60
 -13   7   1   38.00   10.50
  13  -7  -1   32.50   10.70
  13  -7  -1   30.10   10.20
  13  -7  -1   40.40   10.10
  13  -8  -1   20.60    8.80
  13  -8  -1    8.50    9.80
  13  -9  -1  142.29   20.20
  13  -9  -1  171.18   16.80
  13 -10  -1   54.79   13.80
 -12 -10   1   50.59   12.70
 -12 -10   1   90.89   14.60
  12  10  -1   93.79   15.10
 -12  -9   1   62.39   12.80
 -12  -9   1   75.69   13.10
  12   9  -1   79.19   12.80
 -12  -8   1  145.09   16.00
 -12  -8   1  124.79   17.80
  12   8  -1  115.59   15.90
 -12  -7   1  173.58   17.80
 -12  -7   1  142.69   16.20
  12   7  -1  164.28   16.20
  12   7  -1  153.68   14.90
  12   7  -1  171.08   15.80
 -12  -6   1  168.58   16.70
  12   6  -1  148.39   15.20
  12   6  -1  125.79   13.50
  12   6  -1  140.79   14.70
 -12  -5   1    3.60    8.50
  12   5  -1    2.00    6.50
  12   5  -1    3.30    7.70
  12   5  -1    1.50    9.90
  12   5  -1   -5.40    5.40
 -12  -4   1   52.19    7.50
 -12  -4   1   63.29   10.50
  12   4  -1   52.69    9.80
  12   4  -1   86.29   11.90
  12   4  -1   61.09    9.30
  12   4  -1   46.00    7.80
 -12  -3   1   41.90   10.10
 -12  -3   1   28.80    8.40
 -12  -3   1   44.70    7.10
  12   3  -1   37.80    8.00
  12   3  -1   41.20    7.80
  12   3  -1   45.00    9.20
  12   3  -1   39.10    8.10
  12   3  -1   14.90    8.20
 -12  -2   1   64.39   10.60
 -12  -2   1   32.80    6.60
 -12  -2   1   40.70    5.20
 -12  -2   1   40.20    7.40
 -12  -2   1   25.60    5.90
  12   2  -1   50.29    8.30
  12   2  -1   41.60    8.40
  12   2  -1   37.30    7.60
  12   2  -1   41.70    8.10
  12   2  -1   37.50    8.70
 -12  -1   1    7.50    5.70
 -12  -1   1    4.50    4.70
 -12  -1   1   14.90    7.50
 -12  -1   1    4.00    6.10
 -12  -1   1   -2.10    4.90
  12   1  -1   14.40    7.90
  12   1  -1    8.10    5.50
  12   1  -1    0.80    5.40
  12   1  -1   10.30    5.70
  12   1  -1    5.70    6.20
 -12   0   1    3.90    6.20
 -12   0   1    1.70    5.60
 -12   0   1    2.90    5.10
 -12   0   1   -0.60    6.30
 -12   0   1   -3.80    5.40
  12   0  -1   -2.40    5.50
  12   0  -1    3.30    7.00
  12   0  -1   -2.20    4.70
  12   0  -1   -1.10    4.80
  12   0  -1    1.20    5.60
  12   0  -1    0.50    5.90
 -12   1   1    7.30    6.80
 -12   1   1   13.80    7.10
 -12   1   1   -1.20    6.40
 -12   1   1    5.20    5.50
 -12   1   1    8.80    6.10
  12  -1  -1    4.00    9.00
  12  -1  -1    3.20    5.00
  12  -1  -1    3.80    5.30
  12  -1  -1    4.00    6.70
  12  -1  -1    5.80    6.20
  12  -1  -1    0.10    6.00
 -12   2   1   49.80   10.00
 -12   2   1   31.90    7.10
 -12   2   1   35.20    7.90
 -12   2   1   11.10    5.70
 -12   2   1   40.40    8.10
  12  -2  -1   33.80    7.50
  12  -2  -1   47.20    9.70
  12  -2  -1   42.80    9.50
  12  -2  -1   32.40    7.00
  12  -2  -1   33.90    7.90
 -12   3   1   22.80    8.80
 -12   3   1   34.70    7.80
 -12   3   1   28.00    8.80
 -12   3   1   44.40    9.60
 -12   3   1   28.00    7.40
  12  -3  -1   34.70    7.70
  12  -3  -1   42.00    9.80
  12  -3  -1   34.60    7.70
  12  -3  -1   44.20    7.70
  12  -3  -1   34.90    9.20
 -12   4   1   59.19   10.20
 -12   4   1   65.79   10.90
 -12   4   1   69.59   12.30
 -12   4   1   51.89    9.50
 -12   4   1   75.79    9.80
 -12   4   1   61.29   12.00
  12  -4  -1   74.89    9.80
  12  -4  -1   64.49    9.70
  12  -4  -1   80.29    9.10
  12  -4  -1   71.89   11.50
  12  -4  -1   71.09    9.10
  12  -4  -1   55.39   10.00
  12  -4  -1   62.49   10.30
 -12   5   1   12.10    7.80
 -12   5   1    5.10    7.20
 -12   5   1  -11.90    8.00
 -12   5   1   -2.00    7.70
 -12   5   1    1.10    7.00
 -12   5   1   -7.90    8.30
  12  -5  -1   -3.50    4.10
  12  -5  -1   -3.00    7.00
  12  -5  -1   16.90    8.10
  12  -5  -1    5.90    6.30
  12  -5  -1    0.70    5.30
  12  -5  -1    3.50    7.00
  12  -5  -1   -1.30    6.20
 -12   6   1  156.18   17.40
 -12   6   1  134.19   16.10
 -12   6   1  137.89   16.80
 -12   6   1  168.98   18.40
 -12   6   1  203.78   20.30
  12  -6  -1  155.88   11.00
  12  -6  -1  164.98   17.40
  12  -6  -1  167.48   16.90
  12  -6  -1  153.58   14.30
  12  -6  -1  146.59   14.30
 -12   7   1  146.89   17.50
  12  -7  -1  172.48   17.50
  12  -7  -1  175.18   18.40
  12  -7  -1  163.78   15.50
 -12   8   1  138.79   18.10
  12  -8  -1  125.99   18.70
  12  -8  -1  135.99   14.90
  12  -9  -1   83.69   11.40
  12  -9  -1   72.59   13.20
  12 -10  -1   94.79   15.80
 -11 -10   1    5.30    8.60
 -11 -10   1   -2.30   10.00
  11  10  -1   -8.90    8.10
 -11  -9   1   38.30   10.10
 -11  -9   1   33.80   10.50
  11   9  -1   27.40    9.90
 -11  -8   1    0.70    7.50
 -11  -8   1    9.80    9.30
  11   8  -1    2.90    7.30
 -11  -7   1  217.88   18.00
 -11  -7   1  223.98   17.20
  11   7  -1  196.18   15.70
  11   7  -1  191.68   16.60
 -11  -6   1  127.99   15.80
  11   6  -1  154.58   13.60
  11   6  -1  168.88   15.20
  11   6  -1  186.08   15.60
 -11  -5   1  671.03   27.30
 -11  -5   1  630.54   28.90
  11   5  -1  723.53   29.00
  11   5  -1  738.73   28.10
  11   5  -1  680.03   28.50
  11   5  -1  639.54   28.40
 -11  -4   1  241.48   17.00
  11   4  -1  204.88   16.30
  11   4  -1  247.68   14.80
  11   4  -1  186.48   15.00
  11   4  -1  250.27   15.80
 -11  -3   1  125.59   10.70
 -11  -3   1  142.29   10.90
 -11  -3   1  149.69   14.30
  11   3  -1  110.79   12.10
  11   3  -1  126.19   12.40
  11   3  -1  129.79   12.70
  11   3  -1  145.59   12.00
  11   3  -1  122.09   12.30
 -11  -2   1    7.50    4.80
 -11  -2   1   11.80    5.30
 -11  -2   1   -3.70    4.60
 -11  -2   1   13.30    6.90
 -11  -2   1    5.20    3.60
  11   2  -1    7.90    5.00
  11   2  -1    4.50    6.90
  11   2  -1    7.80    5.20
  11   2  -1   -1.30    5.20
  11   2  -1    9.90    6.10
 -11  -1   1 2200.18   65.29
 -11  -1   1 2201.68   66.49
 -11  -1   1 2104.19   63.49
 -11  -1   1 2154.38   68.29
 -11  -1   1 2200.98   66.69
  11   1  -1 2238.18   68.09
  11   1  -1 2293.67   67.19
  11   1  -1 2203.68   67.69
  11   1  -1 2229.68   69.19
  11   1  -1 2247.28   68.69
 -11   0   1   71.09   10.00
 -11   0   1   72.29   11.10
 -11   0   1   82.89   10.00
 -11   0   1   91.29    9.10
 -11   0   1   99.59   11.30
  11   0  -1   73.19    8.90
  11   0  -1   90.69   11.20
  11   0  -1   92.09   10.10
  11   0  -1   88.99   10.80
  11   0  -1   84.79   10.00
  11   0  -1   78.09   11.40
 -11   1   1 2164.08   67.49
 -11   1   1 2216.18   65.89
 -11   1   1 2028.60   65.69
 -11   1   1 2178.18   64.59
 -11   1   1 2126.19   63.19
  11  -1  -1 2034.00   65.59
  11  -1  -1 2112.69   67.19
  11  -1  -1 2226.98   67.49
  11  -1  -1 2131.29   65.99
  11  -1  -1 2189.18   68.09
  11  -1  -1 2086.19   72.59
 -11   2   1    9.40    5.80
 -11   2   1    1.40    6.10
 -11   2   1    3.90    6.50
 -11   2   1    6.20    5.30
  11  -2  -1   12.00    6.10
  11  -2  -1    1.20    6.20
  11  -2  -1    2.50    6.10
  11  -2  -1   -0.10    5.40
  11  -2  -1   -0.50    1.10
  11  -2  -1    7.00    5.20
 -11   3   1  141.69   15.10
 -11   3   1  117.89   14.50
 -11   3   1  145.79   14.10
 -11   3   1  130.99   12.50
 -11   3   1  129.39   11.60
 -11   3   1  151.98   13.50
  11  -3  -1  103.79   11.30
  11  -3  -1  119.99   13.70
  11  -3  -1  126.39   13.30
  11  -3  -1  145.19   11.70
  11  -3  -1  143.69   13.40
  11  -3  -1  152.78   12.70
 -11   4   1  253.27   17.40
 -11   4   1  243.38   15.30
 -11   4   1  235.78   16.80
 -11   4   1  233.38   19.20
 -11   4   1  233.48   16.50
 -11   4   1  252.17   19.00
  11  -4  -1  227.98   17.30
  11  -4  -1  222.88   14.40
  11  -4  -1  260.17   12.40
  11  -4  -1  251.07   15.30
  11  -4  -1  242.28   16.40
  11  -4  -1  225.68   15.50
  11  -4  -1  230.18   17.50
 -11   5   1  682.03   31.60
 -11   5   1  677.13   29.20
 -11   5   1  705.03   30.40
 -11   5   1  705.73   29.70
 -11   5   1  649.04   31.90
 -11   5   1  681.13   27.50
  11  -5  -1  681.33   27.70
  11  -5  -1  717.93   28.40
  11  -5  -1  698.73   25.10
  11  -5  -1  646.04   30.70
  11  -5  -1  657.53   22.60
  11  -5  -1  671.73   28.40
  11  -5  -1  687.93   30.60
 -11   6   1  147.79   16.90
 -11   6   1  149.99   14.80
 -11   6   1  149.69   17.00
 -11   6   1  166.68   16.40
 -11   6   1  127.09   16.10
 -11   6   1  130.69   17.60
  11  -6  -1  145.39   10.10
  11  -6  -1  143.99   13.50
  11  -6  -1  151.28   16.70
  11  -6  -1  159.18   16.20
  11  -6  -1  152.18   14.30
 -11   7   1  210.68   18.40
  11  -7  -1  208.88   15.20
  11  -7  -1  209.28   19.00
  11  -7  -1  191.68   18.10
  11  -7  -1  194.58   15.30
 -11   8   1    8.90    9.00
  11  -8  -1    6.80    8.50
  11  -8  -1   17.10   10.30
  11  -8  -1    0.10    6.60
  11  -9  -1   30.40   10.50
  11  -9  -1   32.60    8.30
  11 -10  -1  -12.60    9.40
 -10 -10   1  178.18   18.80
 -10 -10   1  151.78   18.70
  10  10  -1  130.69   18.30
 -10  -9   1   10.40    8.80
 -10  -9   1   26.90    9.70
  10   9  -1   12.50    8.60
 -10  -8   1   39.30   10.00
 -10  -8   1   13.60    8.20
  10   8  -1   23.10    8.10
  10   8  -1   39.90    9.80
 -10  -7   1   21.50    8.20
 -10  -7   1   20.90    8.60
  10   7  -1   32.30    8.60
  10   7  -1   45.00    8.60
 -10  -6   1   -1.90    7.00
 -10  -6   1    1.50    7.70
  10   6  -1   -3.60    5.10
  10   6  -1    8.70    6.80
  10   6  -1   -1.30    6.50
 -10  -5   1  185.58   15.80
 -10  -5   1  185.78   11.30
  10   5  -1  191.68   14.40
  10   5  -1  190.88   14.40
  10   5  -1  196.68   13.70
  10   5  -1  202.08   15.00
 -10  -4   1   24.70    7.50
  10   4  -1   14.70    5.60
  10   4  -1    7.80    6.40
  10   4  -1    1.80    5.10
  10   4  -1   26.40    7.00
 -10  -3   1    5.10    4.00
 -10  -3   1    2.90    4.50
 -10  -3   1    9.50    6.40
  10   3  -1   10.50    5.50
  10   3  -1    6.10    5.30
  10   3  -1    5.80    4.40
  10   3  -1   -0.30    5.50
  10   3  -1    8.40    5.60
 -10  -2   1   -1.60    5.90
 -10  -2   1   -3.60    4.20
 -10  -2   1    4.80    3.40
 -10  -2   1   -1.90    4.20
 -10  -2   1    3.70    4.20
  10   2  -1    1.80    4.50
  10   2  -1   -0.80    4.80
  10   2  -1   -0.50    4.90
  10   2  -1    2.90    4.50
  10   2  -1    4.90    5.90
 -10  -1   1   50.39    8.10
 -10  -1   1   51.99    6.90
 -10  -1   1   39.80    6.20
 -10  -1   1   41.90    6.60
 -10  -1   1   48.20    7.10
  10   1  -1   58.19    8.50
  10   1  -1   38.50    6.50
  10   1  -1   44.10    6.90
  10   1  -1   49.60    7.20
  10   1  -1   45.80    6.60
 -10   0   1    0.40    5.00
 -10   0   1    6.60    4.10
 -10   0   1    3.70    4.60
 -10   0   1    0.30    5.10
 -10   0   1    3.10    4.70
  10   0  -1   -5.60    4.50
  10   0  -1   -0.60    3.70
  10   0  -1    3.80    4.40
  10   0  -1   -2.30    4.70
  10   0  -1   -0.60    4.60
  10   0  -1   -1.30    4.70
 -10   1   1   40.30    6.60
 -10   1   1   43.90    6.10
 -10   1   1   44.70    6.70
 -10   1   1   37.00    7.10
  10  -1  -1   45.90    7.70
  10  -1  -1   45.80    6.90
  10  -1  -1   58.09    8.70
  10  -1  -1   36.00    6.80
  10  -1  -1   56.99    7.50
  10  -1  -1   29.90    5.40
 -10   2   1   -2.80    6.80
 -10   2   1   -0.30    6.20
 -10   2   1   -0.20    4.90
 -10   2   1   -6.10    4.80
 -10   2   1    0.90    4.30
 -10   2   1    3.00    5.40
  10  -2  -1    5.10    4.80
  10  -2  -1   13.20    5.00
  10  -2  -1    5.40    6.00
  10  -2  -1    4.00    5.10
  10  -2  -1   -0.50    2.80
  10  -2  -1    1.10    1.80
 -10   3   1    1.80    5.50
 -10   3   1    4.30    5.20
 -10   3   1    6.90    6.30
 -10   3   1    5.20    6.20
 -10   3   1    7.20    7.30
 -10   3   1    6.80    4.90
  10  -3  -1   -0.10    5.30
  10  -3  -1    5.50    5.90
  10  -3  -1   -3.30    4.10
  10  -3  -1    3.70    5.30
  10  -3  -1    5.20    4.90
  10  -3  -1    3.10    4.80
 -10   4   1   18.10    6.90
 -10   4   1   12.60    7.10
 -10   4   1   14.60    7.60
 -10   4   1   20.30    8.60
 -10   4   1   15.30    5.90
 -10   4   1   20.10    7.20
  10  -4  -1   12.10    6.00
  10  -4  -1    6.80    5.00
  10  -4  -1   22.10    7.10
  10  -4  -1   13.80    6.00
  10  -4  -1   20.70    7.80
  10  -4  -1    5.00    6.90
  10  -4  -1   25.60    5.10
 -10   5   1  182.88   16.00
 -10   5   1  208.18   16.40
 -10   5   1  209.98   14.50
 -10   5   1  198.08   18.00
 -10   5   1  152.18   14.90
 -10   5   1  185.88   16.80
  10  -5  -1  182.78   14.00
  10  -5  -1  175.88    9.90
  10  -5  -1  238.18   15.30
  10  -5  -1  231.28   17.00
  10  -5  -1  186.48   13.50
  10  -5  -1  202.88   12.30
  10  -5  -1  185.68   16.50
 -10   6   1   10.20    7.20
 -10   6   1    8.00    8.40
 -10   6   1    2.30    8.30
 -10   6   1    1.40    7.30
 -10   6   1   -4.40    7.80
 -10   6   1   -5.30    7.00
  10  -6  -1    0.00    6.10
  10  -6  -1    4.50    6.70
  10  -6  -1    1.70    5.50
  10  -6  -1    2.50    4.40
  10  -6  -1   10.10    7.40
 -10   7   1   36.80    9.40
 -10   7   1   39.90    9.50
 -10   7   1   66.89   18.90
  10  -7  -1   22.00    8.90
  10  -7  -1   44.30    7.90
  10  -7  -1   36.60    7.90
  10  -7  -1   39.20    9.90
 -10   8   1   14.70    8.80
  10  -8  -1   24.30    9.30
  10  -8  -1   31.10    7.50
  10  -8  -1   16.50    9.40
 -10   9   1   13.70    9.70
  10  -9  -1    4.30    6.10
  10  -9  -1   14.10   10.00
  10  -9  -1   24.00   10.50
  10 -10  -1  136.19   19.50
  -9 -11   1  101.59   14.80
  -9 -11   1   79.89   13.60
   9  11  -1  112.39   16.40
  -9 -10   1   12.60    9.10
  -9 -10   1   27.30   10.30
   9  10  -1    8.00    9.40
  -9  -9   1   83.29   12.40
  -9  -9   1   75.29   12.10
   9   9  -1   73.99   11.80
  -9  -8   1  108.29   14.50
  -9  -8   1  106.69   14.90
   9   8  -1   93.29   13.90
   9   8  -1   84.89   12.60
  -9  -7   1  217.48   16.70
  -9  -7   1  234.18   17.80
   9   7  -1  267.77   16.50
   9   7  -1  235.78   17.00
  -9  -6   1   59.59   10.10
  -9  -6   1   90.99   12.60
   9   6  -1   75.29   10.90
   9   6  -1   86.49   10.50
   9   6  -1   87.69   11.40
  -9  -5   1   53.19    7.80
  -9  -5   1   45.10    8.50
   9   5  -1   46.60    8.20
   9   5  -1   53.59    8.50
   9   5  -1   46.10    7.30
   9   5  -1   73.69    9.70
  -9  -4   1  304.77   14.10
  -9  -4   1  311.07   14.20
  -9  -4   1  298.07   17.10
   9   4  -1  298.67   16.20
   9   4  -1  322.97   15.80
   9   4  -1  289.67   16.10
   9   4  -1  317.77   16.30
  -9  -3   1   37.30    5.80
  -9  -3   1   27.90    5.20
  -9  -3   1   55.19    8.10
   9   3  -1   37.60    6.20
   9   3  -1   29.80    6.00
   9   3  -1   42.40    7.50
   9   3  -1   28.80    5.60
   9   3  -1   46.60    7.10
  -9  -2   1 1017.40   34.90
  -9  -2   1 1043.60   31.40
  -9  -2   1  943.01   32.80
  -9  -2   1  998.70   30.20
  -9  -2   1 1032.70   33.20
   9   2  -1 1054.59   34.80
   9   2  -1 1036.80   33.80
   9   2  -1 1027.40   34.00
   9   2  -1  993.40   34.10
   9   2  -1  998.50   34.90
  -9  -1   1    3.80    5.10
  -9  -1   1   16.30    4.00
  -9  -1   1   12.80    4.80
  -9  -1   1   26.70    5.40
  -9  -1   1   20.80    5.90
   9   1  -1   27.90    5.80
   9   1  -1   25.70    5.70
   9   1  -1   14.70    4.80
   9   1  -1   16.30    5.40
   9   1  -1   22.60    5.40
  -9   0   1  207.98   13.00
  -9   0   1  221.18   12.40
  -9   0   1  214.58   10.60
  -9   0   1  200.38   11.90
  -9   0   1  190.98   11.80
   9   0  -1  215.88   12.30
   9   0  -1  188.48   11.80
   9   0  -1  221.18   13.10
   9   0  -1  204.68   12.80
   9   0  -1  217.78   12.20
  -9   1   1   11.90    3.70
  -9   1   1   28.60    5.70
  -9   1   1   27.30    6.30
  -9   1   1   11.10    5.00
   9  -1  -1   15.80    4.60
   9  -1  -1   20.60    6.10
   9  -1  -1   22.00    4.90
   9  -1  -1   18.70    6.20
   9  -1  -1   33.40    6.60
   9  -1  -1   15.00    4.60
  -9   2   1 1021.20   34.30
  -9   2   1 1016.10   33.60
  -9   2   1  997.90   32.80
  -9   2   1 1050.49   36.60
  -9   2   1 1082.49   37.10
  -9   2   1 1006.10   34.50
   9  -2  -1  962.20   32.90
   9  -2  -1 1019.60   35.10
   9  -2  -1 1024.10   34.50
   9  -2  -1 1039.60   34.40
   9  -2  -1 1009.80   36.10
  -9   3   1   34.50    6.30
  -9   3   1   30.80    6.00
  -9   3   1   31.10    7.20
  -9   3   1   33.30    7.50
  -9   3   1   32.70    6.80
  -9   3   1   41.10    7.20
   9  -3  -1   38.30    6.30
   9  -3  -1   35.50    7.20
   9  -3  -1   27.20    6.60
   9  -3  -1   35.50    7.00
   9  -3  -1   37.00    6.30
   9  -3  -1   37.40    5.70
  -9   4   1  302.67   17.30
  -9   4   1  336.07   17.50
  -9   4   1  332.67   15.70
  -9   4   1  300.77   19.20
  -9   4   1  294.07   18.30
  -9   4   1  300.27   16.70
   9  -4  -1  295.37   15.90
   9  -4  -1  331.77   16.50
   9  -4  -1  324.47   14.50
   9  -4  -1  310.47   17.90
   9  -4  -1  302.97   12.90
   9  -4  -1  313.97   18.30
   9  -4  -1  317.37   15.90
  -9   5   1   44.30    9.10
  -9   5   1   30.60    9.40
  -9   5   1   38.80    8.60
  -9   5   1   41.50    7.70
  -9   5   1   40.60    8.60
  -9   5   1   46.30    9.30
   9  -5  -1   51.59    7.60
   9  -5  -1   43.90    6.70
   9  -5  -1   35.10    7.90
   9  -5  -1   54.19    7.60
   9  -5  -1   48.60    9.10
   9  -5  -1   42.90    7.40
   9  -5  -1   46.40    6.10
  -9   6   1   76.99   11.70
  -9   6   1   51.89   10.10
  -9   6   1   74.19   10.80
  -9   6   1   66.29   10.50
  -9   6   1   65.79    9.50
  -9   6   1   91.69   13.10
   9  -6  -1   82.09   11.70
   9  -6  -1   73.39   11.80
   9  -6  -1   82.19   11.20
   9  -6  -1   76.39   10.50
  -9   7   1  230.38   18.20
  -9   7   1  231.28   19.30
  -9   7   1  225.58   17.70
  -9   7   1  251.97   19.90
  -9   7   1  253.47   18.80
   9  -7  -1  256.77   19.60
   9  -7  -1  264.07   18.80
   9  -7  -1  223.28   14.60
   9  -7  -1  213.88   14.40
  -9   8   1  106.89   15.60
   9  -8  -1  100.19   10.80
   9  -8  -1  126.29   16.70
   9  -8  -1  110.69   15.30
  -9   9   1   76.39   13.20
   9  -9  -1   70.19    8.70
   9  -9  -1  114.89   16.30
   9  -9  -1   66.09   13.00
   9 -10  -1   23.50   10.70
   9 -11  -1   74.89   14.50
  -8 -11   1  138.99   18.30
  -8 -11   1  103.29   14.90
   8  11  -1  150.18   18.90
  -8 -10   1  150.88   17.50
  -8 -10   1  133.29   16.70
   8  10  -1  133.19   17.70
  -8  -9   1  122.39   15.70
  -8  -9   1  116.89   15.30
   8   9  -1  126.69   15.80
  -8  -8   1   -5.50    7.00
  -8  -8   1   -0.60    6.50
   8   8  -1   -1.70    6.60
   8   8  -1   -9.30    5.20
  -8  -7   1   45.20    9.50
  -8  -7   1   64.59    9.80
   8   7  -1   80.69   10.50
   8   7  -1   84.19   11.20
  -8  -6   1   27.90    8.00
  -8  -6   1    7.20    6.40
   8   6  -1   18.00    6.20
   8   6  -1   11.40    6.20
   8   6  -1   13.20    7.00
  -8  -5   1  496.95   18.70
  -8  -5   1  482.35   22.30
   8   5  -1  491.75   21.50
   8   5  -1  522.35   22.00
   8   5  -1  468.95   20.70
   8   5  -1  487.15   20.70
  -8  -4   1    5.10    3.70
  -8  -4   1   -1.10    5.50
  -8  -4   1    1.80    3.50
   8   4  -1    0.50    4.70
   8   4  -1    2.50    3.80
   8   4  -1    0.40    4.00
   8   4  -1    0.40    4.80
  -8  -3   1  412.16   18.20
  -8  -3   1  371.76   15.70
  -8  -3   1  378.96   15.80
   8   3  -1  388.16   17.20
   8   3  -1  401.46   17.80
   8   3  -1  386.16   16.60
   8   3  -1  397.36   16.80
   8   3  -1  400.56   17.40
  -8  -2   1  207.48   11.30
  -8  -2   1  241.68   10.60
  -8  -2   1  230.48   11.60
  -8  -2   1  227.08    9.40
  -8  -2   1  212.28   12.90
   8   2  -1  228.18   12.40
   8   2  -1  239.58   12.40
   8   2  -1  214.48   12.60
   8   2  -1  213.98   11.70
   8   2  -1  217.48   12.30
  -8  -1   1   25.60    4.70
  -8  -1   1   26.90    4.00
  -8  -1   1   25.10    5.10
  -8  -1   1   22.10    5.40
  -8  -1   1   18.30    4.50
   8   1  -1   20.20    4.80
   8   1  -1   21.80    5.40
   8   1  -1   23.50    4.80
   8   1  -1   24.30    5.20
   8   1  -1   23.60    5.00
  -8   0   1   -3.30    4.30
  -8   0   1    4.40    3.40
  -8   0   1   -4.00    3.70
  -8   0   1    0.60    3.60
  -8   0   1   -6.80    3.90
   8   0  -1   -0.70    3.40
   8   0  -1   -1.90    3.30
   8   0  -1    2.60    4.30
   8   0  -1    6.30    4.50
   8   0  -1   -2.20    3.90
   8   0  -1   -4.10    3.50
  -8   1   1   14.50    4.90
  -8   1   1    8.20    3.30
  -8   1   1   20.00    5.10
  -8   1   1   22.00    4.80
   8  -1  -1   27.80    5.80
   8  -1  -1   17.50    3.90
   8  -1  -1   28.90    5.70
   8  -1  -1   22.50    4.70
   8  -1  -1    2.90    3.00
   8  -1  -1   25.50    6.10
  -8   2   1  215.88   13.80
  -8   2   1  215.18   11.80
  -8   2   1  210.08   12.40
  -8   2   1  219.78   11.80
  -8   2   1  200.98   10.90
  -8   2   1  209.28   13.80
   8  -2  -1  206.98   11.40
   8  -2  -1  248.08   12.40
   8  -2  -1  211.98   12.30
   8  -2  -1  181.88   12.50
   8  -2  -1  196.08   11.00
   8  -2  -1  144.09   10.70
  -8   3   1  381.36   18.90
  -8   3   1  390.56   16.20
  -8   3   1  375.86   17.20
  -8   3   1  384.96   17.90
  -8   3   1  374.16   17.10
  -8   3   1  379.56   19.40
   8  -3  -1  398.36   18.70
   8  -3  -1  385.16   17.20
   8  -3  -1  391.36   15.80
   8  -3  -1  418.46   17.40
   8  -3  -1  404.56   19.10
   8  -3  -1  378.36   16.50
  -8   4   1    2.50    5.50
  -8   4   1   -0.30    5.70
  -8   4   1    3.90    5.20
  -8   4   1   -4.20    4.70
  -8   4   1   -2.30    4.70
  -8   4   1   -4.90    5.30
   8  -4  -1   -0.40    3.60
   8  -4  -1    1.80    4.70
   8  -4  -1   -0.80    5.40
   8  -4  -1    7.20    4.40
   8  -4  -1   -5.80    5.40
   8  -4  -1   -3.60    3.80
   8  -4  -1   -1.60    4.00
  -8   5   1  508.55   23.60
  -8   5   1  486.45   20.70
  -8   5   1  453.85   23.90
  -8   5   1  512.55   22.50
  -8   5   1  519.05   22.50
  -8   5   1  525.25   23.50
   8  -5  -1  531.05   20.90
   8  -5  -1  548.15   21.60
   8  -5  -1  498.85   20.70
   8  -5  -1  480.65   18.10
   8  -5  -1  497.25   17.60
   8  -5  -1  472.45   23.80
   8  -5  -1  486.65   23.00
  -8   6   1    7.80    8.20
  -8   6   1    8.10    7.20
  -8   6   1   12.50    7.80
  -8   6   1   19.30    7.20
  -8   6   1   11.50    6.70
  -8   6   1   24.50    8.20
   8  -6  -1   12.40    5.80
   8  -6  -1    9.60    7.20
   8  -6  -1   12.90    7.50
   8  -6  -1   26.60    6.00
  -8   7   1   72.19   11.80
  -8   7   1   54.99    9.70
  -8   7   1   71.99   11.40
  -8   7   1   74.89   11.40
  -8   7   1   84.99   11.50
   8  -7  -1   44.70    9.40
   8  -7  -1   80.59   10.30
   8  -7  -1   62.59    9.20
   8  -7  -1   79.49   12.00
  -8   8   1   -2.80    7.20
  -8   8   1    2.40    7.70
   8  -8  -1    7.70    7.50
   8  -8  -1    7.00    5.10
   8  -8  -1    4.60    7.20
  -8   9   1  110.59   16.70
   8  -9  -1  120.19   12.70
   8  -9  -1  119.39   16.90
   8  -9  -1  126.79   17.50
  -8  10   1  148.29   19.00
   8 -10  -1  118.09   16.60
   8 -10  -1  108.59   14.80
   8 -11  -1  142.79   19.90
  -7 -11   1   31.70   11.10
  -7 -11   1   31.70   10.90
   7  11  -1   23.90   10.80
  -7 -10   1   12.70    9.30
  -7 -10   1    8.30    8.70
   7  10  -1   -0.30    8.30
  -7  -9   1  157.68   16.90
  -7  -9   1  188.78   16.70
   7   9  -1  131.59   16.10
   7   9  -1  206.38   19.00
  -7  -8   1  635.64   28.50
  -7  -8   1  601.84   27.90
   7   8  -1  640.14   28.60
   7   8  -1  689.63   28.30
  -7  -7   1   65.79    9.90
  -7  -7   1  100.39   13.20
   7   7  -1  103.29   11.80
   7   7  -1   87.59   12.80
  -7  -6   1  128.49    9.60
  -7  -6   1  101.39   11.90
  -7  -6   1  100.19   12.80
   7   6  -1  126.39   11.50
   7   6  -1  111.49   12.40
   7   6  -1  104.39   11.60
  -7  -5   1  214.58   13.90
  -7  -5   1  229.58   11.50
  -7  -5   1  222.98   14.50
  -7  -5   1  233.88   11.70
   7   5  -1  206.98   13.70
   7   5  -1  232.48   13.10
   7   5  -1  214.48   12.80
   7   5  -1  210.48   13.70
  -7  -4   1  193.08   10.30
  -7  -4   1  212.68   10.70
  -7  -4   1  215.48   13.20
   7   4  -1  195.28   11.70
   7   4  -1  207.38   11.60
   7   4  -1  205.58   11.80
   7   4  -1  202.68   12.20
   7   4  -1  200.88   12.20
  -7  -3   1 2901.51   83.19
  -7  -3   1 3055.89   84.89
  -7  -3   1 2865.41   82.79
   7   3  -1 2891.21   83.69
   7   3  -1 2980.70   83.59
   7   3  -1 2900.21   84.49
   7   3  -1 2891.01   84.29
   7   3  -1 2828.62   83.99
  -7  -2   1  199.88   10.40
  -7  -2   1  227.58   10.60
  -7  -2   1  195.78    8.30
  -7  -2   1  208.28    9.50
  -7  -2   1  207.28   11.70
   7   2  -1  211.58   11.40
   7   2  -1  199.88   11.20
   7   2  -1  202.48   10.70
   7   2  -1  223.98   11.30
   7   2  -1  188.98   10.80
  -7  -1   1  285.47   11.00
  -7  -1   1  268.97   12.50
  -7  -1   1  254.77   12.20
  -7  -1   1  273.87   12.50
  -7  -1   1  279.27   13.40
   7   1  -1  268.47   13.40
   7   1  -1  293.37   12.90
   7   1  -1  293.87   13.00
   7   1  -1  282.27   12.70
   7   1  -1  282.67   13.00
  -7   0   1   -2.30    3.80
  -7   0   1    5.60    3.20
  -7   0   1    0.50    3.60
  -7   0   1    4.90    3.80
  -7   0   1   -2.40    3.30
   7   0  -1    0.20    3.20
   7   0  -1    4.10    3.60
   7   0  -1    4.30    4.00
   7   0  -1    7.50    3.90
   7   0  -1    6.30    3.80
   7   0  -1    1.30    3.40
  -7   1   1  266.67   13.50
  -7   1   1  284.37   12.70
  -7   1   1  255.47   11.40
  -7   1   1  263.47   12.10
  -7   1   1  273.47   12.60
   7  -1  -1  259.67   12.30
   7  -1  -1  249.38   12.80
   7  -1  -1  280.87   14.00
  -7   2   1  213.78   11.50
  -7   2   1  233.18   11.60
  -7   2   1  202.28   13.10
  -7   2   1  229.18   10.70
  -7   2   1  217.78   13.20
  -7   2   1  216.98   11.80
   7  -2  -1  217.68   12.50
   7  -2  -1  210.68   10.80
   7  -2  -1  211.98   12.50
   7  -2  -1  222.28   11.40
   7  -2  -1  221.78   11.50
   7  -2  -1  225.38   11.20
  -7   3   1 2974.70   82.89
  -7   3   1 2932.31   83.49
  -7   3   1 2927.81   85.69
  -7   3   1 2875.81   84.69
  -7   3   1 2849.61   84.09
  -7   3   1 2934.91   86.49
   7  -3  -1 2985.00   85.69
   7  -3  -1 2823.32   83.99
   7  -3  -1 2956.90   81.49
   7  -3  -1 2884.61   82.19
   7  -3  -1 2972.80   84.09
   7  -3  -1 2791.42   83.39
   7  -3  -1 2872.01   86.09
  -7   4   1  208.28   13.20
  -7   4   1  201.98   12.60
  -7   4   1  212.48   11.80
  -7   4   1  192.78   12.70
  -7   4   1  161.48   13.70
  -7   4   1  215.08   13.70
   7  -4  -1  194.28   10.10
   7  -4  -1  181.38   13.60
   7  -4  -1  190.88   11.40
   7  -4  -1  206.68   11.80
   7  -4  -1  206.18    9.80
   7  -4  -1  200.48   13.10
   7  -4  -1  207.98   11.70
  -7   5   1  242.78   15.30
  -7   5   1  206.08   14.10
  -7   5   1  241.08   13.20
  -7   5   1  221.68   15.70
  -7   5   1  216.88   14.70
  -7   5   1  223.28   15.10
   7  -5  -1  244.88   13.00
   7  -5  -1  223.18   13.00
   7  -5  -1  244.48   11.70
   7  -5  -1  235.18   12.60
   7  -5  -1  209.18   14.50
   7  -5  -1  203.58   15.60
  -7   6   1  121.89   13.20
  -7   6   1  102.79   13.60
  -7   6   1  120.39   13.60
  -7   6   1  116.99   13.60
  -7   6   1  131.09   13.40
  -7   6   1  131.29   14.10
   7  -6  -1  144.39   14.80
   7  -6  -1  133.89   10.20
   7  -6  -1  126.09   10.70
   7  -6  -1  103.79   13.00
  -7   7   1   77.89   11.10
  -7   7   1   55.49    9.50
  -7   7   1   89.49   11.30
  -7   7   1  109.79   13.90
  -7   7   1   74.09   11.20
   7  -7  -1  100.99    9.50
   7  -7  -1   90.69   10.10
   7  -7  -1   69.39   11.30
   7  -7  -1   99.99   13.40
  -7   8   1  621.74   30.40
  -7   8   1  620.44   29.00
   7  -8  -1  665.93   29.40
   7  -8  -1  660.33   31.10
   7  -8  -1  616.24   22.90
  -7   9   1  206.18   18.70
   7  -9  -1  204.28   18.50
   7  -9  -1  194.18   19.30
  -7  10   1   12.00    9.90
   7 -10  -1    4.20    9.00
   7 -10  -1    3.50    8.80
   7 -11  -1   29.00   11.40
  -6 -11   1  244.58   21.40
  -6 -11   1  264.17   21.80
   6  11  -1  297.77   23.40
  -6 -10   1   -4.20    8.10
  -6 -10   1    8.80    7.70
   6  10  -1    5.50    8.20
  -6  -9   1  158.68   16.40
  -6  -9   1  139.49   15.50
   6   9  -1  169.08   15.50
   6   9  -1  159.98   16.60
  -6  -8   1    1.40    6.40
  -6  -8   1    0.40    6.70
   6   8  -1   -0.80    5.60
   6   8  -1    0.60    6.80
  -6  -7   1    6.20    6.90
  -6  -7   1   -1.70    6.40
   6   7  -1   10.60    6.40
   6   7  -1    9.40    5.80
  -6  -6   1  133.99   12.20
  -6  -6   1  152.68   13.30
  -6  -6   1  154.98    9.50
   6   6  -1  125.49   11.70
   6   6  -1  128.39   11.30
   6   6  -1  127.89   12.40
  -6  -5   1  585.54   23.40
  -6  -5   1  596.94   20.70
  -6  -5   1  603.44   21.00
  -6  -5   1  579.74   23.60
   6   5  -1  616.14   23.00
   6   5  -1  590.04   23.30
   6   5  -1  611.24   23.70
  -6  -4   1   99.09    7.60
  -6  -4   1  110.39    7.80
  -6  -4   1  104.89    9.90
   6   4  -1   99.59    9.00
   6   4  -1  120.79    9.00
   6   4  -1   97.59    9.10
   6   4  -1  124.09    8.70
   6   4  -1   93.19    8.80
  -6  -3   1  338.27   15.70
  -6  -3   1  372.76   14.20
   6   3  -1  345.47   14.90
   6   3  -1  371.76   14.60
   6   3  -1  356.16   14.60
   6   3  -1  360.86   15.20
   6   3  -1  374.66   15.50
  -6  -2   1  369.96   12.30
  -6  -2   1  371.86   14.40
  -6  -2   1  359.86   14.20
  -6  -2   1  379.96   13.30
  -6  -2   1  383.76   15.70
   6   2  -1  379.06   14.80
   6   2  -1  378.46   14.70
   6   2  -1  379.86   15.30
   6   2  -1  384.56   15.00
   6   2  -1  365.76   15.20
  -6  -1   1    6.50    3.30
  -6  -1   1    3.60    3.90
  -6  -1   1    6.30    3.80
  -6  -1   1    8.50    3.60
  -6  -1   1    5.80    2.90
  -6  -1   1    8.80    3.90
   6   1  -1    3.90    3.70
   6   1  -1    4.60    3.20
   6   1  -1    3.50    3.50
   6   1  -1    4.80    3.90
   6   1  -1    5.80    3.50
  -6   0   1   -8.00    3.80
  -6   0   1   -3.30    3.00
  -6   0   1    0.60    4.00
  -6   0   1   -2.90    3.60
  -6   0   1    0.40    4.20
  -6   0   1   -7.30    2.70
   6   0  -1    2.00    3.50
   6   0  -1   -5.70    3.30
   6   0  -1   -6.40    3.00
   6   0  -1   -5.60    3.50
   6   0  -1   -4.50    3.50
  -6   1   1    3.30    3.90
  -6   1   1    9.30    4.30
  -6   1   1    1.00    3.80
  -6   1   1    5.40    3.20
  -6   1   1   -1.00    3.50
  -6   1   1    6.00    3.60
  -6   1   1    5.40    3.70
   6  -1  -1   16.10    4.50
   6  -1  -1    5.70    3.20
   6  -1  -1    4.70    3.80
  -6   2   1  361.66   14.10
  -6   2   1  365.26   16.50
  -6   2   1  377.66   16.90
  -6   2   1  378.06   15.20
  -6   2   1  373.46   15.50
  -6   2   1  381.06   15.00
   6  -2  -1  400.56   16.60
   6  -2  -1  387.46   15.30
   6  -2  -1  387.96   14.30
   6  -2  -1  368.76   16.40
   6  -2  -1  381.06   15.20
   6  -2  -1  388.46   14.90
  -6   3   1  359.66   16.40
  -6   3   1  368.86   15.30
  -6   3   1  362.76   15.50
  -6   3   1  359.06   17.20
  -6   3   1  368.06   15.90
  -6   3   1  371.56   14.40
   6  -3  -1  351.06   14.80
   6  -3  -1  370.56   13.80
   6  -3  -1  369.76   13.40
   6  -3  -1  385.36   15.10
   6  -3  -1  366.86   17.00
   6  -3  -1  352.76   15.20
   6  -3  -1  370.46   16.60
  -6   4   1  100.79    9.50
  -6   4   1  109.59   10.20
  -6   4   1  130.49   10.60
  -6   4   1   82.99    8.10
  -6   4   1  107.69   10.20
  -6   4   1   82.89   10.60
   6  -4  -1  111.29    7.00
   6  -4  -1  107.09    8.30
   6  -4  -1  100.79    8.50
   6  -4  -1   97.09   10.70
   6  -4  -1  125.69   10.20
   6  -4  -1  106.39    8.70
   6  -4  -1  102.59    7.30
  -6   5   1  610.44   25.10
  -6   5   1  581.84   24.50
  -6   5   1  582.54   21.90
  -6   5   1  621.04   25.70
  -6   5   1  646.14   23.70
  -6   5   1  624.94   24.30
   6  -5  -1  617.74   22.40
   6  -5  -1  583.54   25.80
   6  -5  -1  601.14   21.60
   6  -5  -1  620.24   24.70
   6  -5  -1  576.64   22.40
  -6   6   1  129.79   12.80
  -6   6   1  156.38   11.30
  -6   6   1  161.58   13.80
  -6   6   1  150.58   14.10
  -6   6   1  153.08   13.90
  -6   6   1  153.48   14.50
   6  -6  -1  151.18    9.90
   6  -6  -1  165.08   13.30
   6  -6  -1  131.59   14.30
   6  -6  -1  135.79   10.40
  -6   7   1    6.90    7.50
  -6   7   1    0.70    6.90
  -6   7   1    7.50    7.10
  -6   7   1    3.30    6.40
  -6   7   1   20.40    8.00
   6  -7  -1   10.40    6.80
   6  -7  -1    5.20    7.60
   6  -7  -1   17.50    4.80
   6  -7  -1    8.10    4.90
  -6   8   1    3.90    7.40
  -6   8   1   14.20    7.50
  -6   8   1    6.30    7.50
   6  -8  -1   22.60    8.10
   6  -8  -1   -0.40    7.10
   6  -8  -1    4.80    4.00
  -6   9   1  165.78   17.20
   6  -9  -1  147.59   16.50
   6  -9  -1  139.69   17.30
  -6  10   1   -2.90    8.30
   6 -10  -1   -5.00    8.60
   6 -10  -1   -0.40    8.20
  -6  11   1  228.48   26.90
   6 -11  -1  261.27   22.90
   6 -11  -1  236.28   21.70
  -5 -11   1   -2.20    8.10
  -5 -11   1    6.00    9.50
   5  11  -1    6.20    9.50
  -5 -10   1   60.29   11.50
  -5 -10   1   58.59   11.10
   5  10  -1   81.89   12.90
  -5  -9   1   31.40    9.30
  -5  -9   1   38.30    9.70
   5   9  -1   38.20    9.50
   5   9  -1   28.60    8.60
  -5  -8   1  467.25   23.80
  -5  -8   1  501.25   24.00
   5   8  -1  507.45   24.40
   5   8  -1  499.95   23.80
  -5  -7   1   53.89    9.10
  -5  -7   1   47.70    8.90
   5   7  -1   44.10    8.30
   5   7  -1   51.59    8.30
  -5  -6   1  588.54   20.40
  -5  -6   1  530.45   23.40
  -5  -6   1  599.64   25.60
  -5  -6   1  570.14   23.80
   5   6  -1  556.44   23.40
   5   6  -1  564.44   23.40
   5   6  -1  544.25   23.00
  -5  -5   1 1055.29   33.70
  -5  -5   1 1086.39   36.40
  -5  -5   1 1099.09   34.00
  -5  -5   1 1086.69   33.40
  -5  -5   1 1076.59   36.30
   5   5  -1 1098.49   36.40
   5   5  -1 1089.59   35.70
   5   5  -1 1084.59   36.00
  -5  -4   1   -0.60    3.10
  -5  -4   1    1.30    3.10
  -5  -4   1    7.00    4.30
  -5  -4   1    3.80    4.50
  -5  -4   1    2.60    3.20
   5   4  -1    8.30    4.00
   5   4  -1    5.90    3.60
   5   4  -1    0.10    3.80
   5   4  -1    5.00    3.90
   5   4  -1    2.40    3.80
  -5  -3   1  619.34   20.80
  -5  -3   1  619.64   20.60
  -5  -3   1  634.74   21.20
  -5  -3   1  619.84   22.10
   5   3  -1  636.74   21.30
   5   3  -1  595.14   21.70
   5   3  -1  629.74   21.50
   5   3  -1  644.74   21.10
   5   3  -1  605.94   21.50
  -5  -2   1 1228.38   37.00
  -5  -2   1 1240.18   37.10
  -5  -2   1 1261.77   37.70
  -5  -2   1 1190.68   35.10
  -5  -2   1 1278.47   38.20
  -5  -2   1 1256.27   35.80
   5   2  -1 1253.37   38.00
   5   2  -1 1234.08   37.20
   5   2  -1 1274.77   37.50
   5   2  -1 1272.17   37.70
   5   2  -1 1216.58   37.80
  -5  -1   1    4.70    3.30
  -5  -1   1   11.70    3.80
  -5  -1   1    2.70    4.00
  -5  -1   1   -1.90    2.50
  -5  -1   1    8.90    3.50
  -5  -1   1    0.10    3.10
   5   1  -1    1.00    3.00
   5   1  -1   10.40    3.90
   5   1  -1    5.00    3.30
   5   1  -1   -1.80    3.10
   5   1  -1    3.80    3.60
  -5   0   1  723.73   22.90
  -5   0   1  706.73   22.90
  -5   0   1  689.33   23.40
  -5   0   1  724.93   23.20
   5   0  -1  700.03   23.20
   5   0  -1  745.43   23.60
   5   0  -1  709.83   22.90
   5   0  -1  698.03   23.00
   5   0  -1  725.13   23.50
  -5   1   1    5.20    3.60
  -5   1   1    3.20    3.40
  -5   1   1    3.10    4.10
  -5   1   1   -0.40    2.90
  -5   1   1   -0.90    3.30
  -5   1   1    3.60    3.50
  -5   1   1    0.70    2.80
   5  -1  -1    1.10    3.90
   5  -1  -1    0.40    3.40
   5  -1  -1    2.60    2.00
   5  -1  -1    4.10    2.20
   5  -1  -1    1.20    1.80
   5  -1  -1    2.70    2.60
  -5   2   1 1284.17   37.60
  -5   2   1 1259.07   37.30
  -5   2   1 1241.18   38.90
  -5   2   1 1227.58   36.70
  -5   2   1 1222.18   38.20
  -5   2   1 1236.08   37.70
  -5   2   1 1281.67   39.70
   5  -2  -1 1230.68   37.60
   5  -2  -1 1212.38   39.00
   5  -2  -1 1247.08   37.60
   5  -2  -1 1255.17   37.90
   5  -2  -1 1250.27   36.70
   5  -2  -1 1319.97   39.00
  -5   3   1  644.94   21.20
  -5   3   1  621.74   21.20
  -5   3   1  627.84   21.80
  -5   3   1  614.94   20.40
  -5   3   1  611.44   22.50
  -5   3   1  623.24   23.50
  -5   3   1  608.24   22.20
   5  -3  -1  612.14   19.60
   5  -3  -1  648.54   21.60
   5  -3  -1  619.64   20.90
   5  -3  -1  617.44   21.10
   5  -3  -1  609.24   22.30
   5  -3  -1  629.84   20.00
   5  -3  -1  593.94   23.10
  -5   4   1    2.00    4.20
  -5   4   1    6.70    4.60
  -5   4   1   -3.30    3.20
  -5   4   1    5.60    3.50
  -5   4   1    1.90    4.30
  -5   4   1    3.80    3.90
  -5   4   1    1.60    4.80
   5  -4  -1    5.80    4.80
   5  -4  -1    6.30    3.90
   5  -4  -1    2.40    3.20
   5  -4  -1    4.90    4.20
   5  -4  -1    3.60    3.20
   5  -4  -1   -0.10    3.20
  -5   5   1 1065.09   37.20
  -5   5   1 1129.99   35.60
  -5   5   1 1050.79   37.70
  -5   5   1 1110.69   37.90
  -5   5   1 1049.79   36.40
  -5   5   1 1087.99   34.50
  -5   5   1 1101.89   34.70
   5  -5  -1 1094.99   35.10
   5  -5  -1 1134.19   37.30
   5  -5  -1 1067.59   34.70
   5  -5  -1 1159.18   39.20
   5  -5  -1 1108.19   33.90
  -5   6   1  521.65   24.80
  -5   6   1  606.24   25.30
  -5   6   1  566.04   22.80
  -5   6   1  569.74   24.10
  -5   6   1  577.44   24.40
   5  -6  -1  564.04   21.30
   5  -6  -1  599.84   24.30
   5  -6  -1  564.74   19.80
   5  -6  -1  539.75   25.40
  -5   7   1   32.10    8.20
  -5   7   1   52.79    9.20
  -5   7   1   54.79    9.10
  -5   7   1   61.79    9.50
  -5   7   1   63.59   10.40
   5  -7  -1   47.70    6.30
   5  -7  -1   51.29    6.70
   5  -7  -1   33.00    9.50
   5  -7  -1   47.40    9.20
  -5   8   1  524.85   26.10
  -5   8   1  517.35   25.50
  -5   8   1  511.65   26.20
   5  -8  -1  507.55   25.10
   5  -8  -1  527.85   18.00
   5  -8  -1  511.95   26.70
  -5   9   1   53.69   10.90
  -5   9   1   51.99   11.00
   5  -9  -1   28.00   10.20
   5  -9  -1   55.19   10.70
  -5  10   1   42.50   11.40
   5 -10  -1   44.30   11.00
   5 -10  -1   63.49   12.90
  -5  11   1   -0.40    9.40
   5 -11  -1    2.60    9.20
   5 -11  -1    2.20    9.50
  -4 -11   1  140.19   18.10
  -4 -11   1  145.09   17.60
   4  11  -1  135.69   19.10
  -4 -10   1  161.18   17.60
  -4 -10   1  184.68   18.10
   4  10  -1  191.38   19.10
  -4  -9   1  368.66   21.40
  -4  -9   1  342.07   21.10
   4   9  -1  351.46   21.90
  -4  -8   1    1.50    7.00
  -4  -8   1    0.40    6.40
   4   8  -1    4.50    6.90
  -4  -7   1  207.68   15.20
  -4  -7   1  204.68   15.40
  -4  -7   1  225.28   10.70
   4   7  -1  214.38   15.50
   4   7  -1  242.18   14.90
  -4  -6   1   96.19    8.00
  -4  -6   1   89.59    7.20
  -4  -6   1   84.49   11.00
  -4  -6   1   87.89   10.70
   4   6  -1   92.89   11.00
   4   6  -1   84.69   10.10
  -4  -5   1   22.40    5.80
  -4  -5   1   18.70    4.30
  -4  -5   1   16.40    5.30
  -4  -5   1   19.20    3.90
  -4  -5   1   12.30    3.80
   4   5  -1    9.40    4.80
   4   5  -1   10.80    4.70
  -4  -4   1   24.30    4.10
  -4  -4   1   27.30    4.20
  -4  -4   1   29.60    4.20
  -4  -4   1   23.30    5.30
  -4  -4   1   22.60    4.70
   4   4  -1   20.30    4.50
   4   4  -1   26.00    4.70
   4   4  -1   22.10    4.30
   4   4  -1   25.30    5.20
  -4  -3   1  417.96   15.90
  -4  -3   1  400.46   14.50
  -4  -3   1  412.76   14.50
  -4  -3   1  403.96   14.50
   4   3  -1  391.36   14.60
   4   3  -1  384.96   15.20
   4   3  -1  407.86   14.90
   4   3  -1  397.36   15.60
   4   3  -1  381.76   14.90
  -4  -2   1  384.86   14.60
  -4  -2   1  377.76   13.80
  -4  -2   1  377.96   12.40
  -4  -2   1  369.36   11.80
  -4  -2   1  387.26   13.70
  -4  -2   1  360.06   13.50
   4   2  -1  363.16   14.00
   4   2  -1  384.46   13.80
   4   2  -1  379.16   13.80
   4   2  -1  338.87   14.00
   4   2  -1  383.36   14.20
  -4  -1   1    0.30    2.80
  -4  -1   1   -2.00    3.30
  -4  -1   1   -3.70    2.60
  -4  -1   1   -0.10    3.20
  -4  -1   1   -5.10    3.30
   4   1  -1    1.00    2.70
   4   1  -1    2.30    3.30
   4   1  -1   -2.10    3.50
   4   1  -1   -0.70    2.70
   4   1  -1   -2.80    3.40
  -4   0   1    0.00    2.50
  -4   0   1    0.90    2.80
  -4   0   1    0.00    0.60
  -4   0   1    2.00    2.90
  -4   0   1   -0.60    2.60
   4   0  -1   -2.80    2.70
   4   0  -1    4.60    3.00
   4   0  -1   -3.70    2.00
   4   0  -1   -5.30    2.20
   4   0  -1   -1.20    2.10
  -4   1   1   -4.10    2.70
  -4   1   1   -0.30    3.50
  -4   1   1    0.00    2.80
  -4   1   1   -2.50    2.60
  -4   1   1   -1.10    2.90
  -4   1   1   -2.30    3.10
  -4   1   1   -0.80    3.70
   4  -1  -1    2.60    3.30
   4  -1  -1   -2.90    2.60
   4  -1  -1    2.70    2.90
   4  -1  -1   -0.20    3.10
   4  -1  -1   -0.80    3.20
   4  -1  -1   -1.40    2.90
  -4   2   1  364.76   13.20
  -4   2   1  356.66   14.70
  -4   2   1  357.66   14.00
  -4   2   1  381.26   14.50
  -4   2   1  388.36   13.70
  -4   2   1  388.06   15.70
  -4   2   1  397.26   14.00
   4  -2  -1  389.36   13.80
   4  -2  -1  383.16   13.20
   4  -2  -1  385.26   14.10
   4  -2  -1  365.76   13.70
   4  -2  -1  380.66   15.40
   4  -2  -1  383.96   13.10
   4  -2  -1  380.66   15.00
  -4   3   1  406.86   15.30
  -4   3   1  387.86   15.80
  -4   3   1  394.06   15.70
  -4   3   1  403.96   14.10
  -4   3   1  376.06   16.40
  -4   3   1  405.06   14.50
  -4   3   1  379.56   14.50
  -4   3   1  411.16   14.10
   4  -3  -1  401.36   14.60
   4  -3  -1  407.26   14.20
   4  -3  -1  392.16   14.20
   4  -3  -1  391.66   15.70
   4  -3  -1  398.26   14.90
   4  -3  -1  397.36   12.90
   4  -3  -1  364.76   16.70
  -4   4   1   21.10    4.70
  -4   4   1   24.20    4.60
  -4   4   1   24.70    3.80
  -4   4   1   18.40    5.10
  -4   4   1   30.40    5.90
  -4   4   1   24.50    5.20
  -4   4   1   27.90    4.70
  -4   4   1   26.20    4.30
   4  -4  -1    9.00    4.70
   4  -4  -1   24.80    3.80
   4  -4  -1   31.60    5.40
   4  -4  -1   21.70    4.10
   4  -4  -1   23.70    4.40
   4  -4  -1   25.50    5.20
  -4   5   1   16.70    5.10
  -4   5   1   17.50    5.00
  -4   5   1   22.50    5.80
  -4   5   1    6.70    4.00
  -4   5   1    9.10    5.00
  -4   5   1   21.30    5.70
  -4   5   1   17.30    6.00
   4  -5  -1   12.80    5.40
   4  -5  -1    9.80    3.90
   4  -5  -1   15.00    5.50
   4  -5  -1    4.80    3.50
   4  -5  -1   12.20    3.40
  -4   6   1   67.99    9.00
  -4   6   1   83.99   10.70
  -4   6   1   85.49   11.60
  -4   6   1   99.19   11.30
  -4   6   1   70.79   10.70
   4  -6  -1   84.89   10.90
   4  -6  -1   79.79   11.40
   4  -6  -1   75.79    7.90
   4  -6  -1   83.39    6.40
  -4   7   1  222.78   15.40
  -4   7   1  226.98   16.10
  -4   7   1  201.58   16.30
  -4   7   1  219.78   15.90
  -4   7   1  231.08   16.30
   4  -7  -1  217.08    9.70
   4  -7  -1  226.08   17.00
   4  -7  -1  228.88   12.00
   4  -7  -1  233.68   16.10
  -4   8   1    5.40    7.40
  -4   8   1   -0.20    7.50
  -4   8   1   -7.30    6.00
  -4   8   1   11.20    7.70
   4  -8  -1    9.00    7.20
   4  -8  -1    2.80    6.90
   4  -8  -1    3.20    2.80
  -4   9   1  348.47   22.10
  -4   9   1  317.77   21.30
   4  -9  -1  353.26   22.50
   4  -9  -1  357.26   21.60
  -4  10   1  171.08   18.60
   4 -10  -1  157.38   18.50
   4 -10  -1  202.48   18.60
  -4  11   1   93.59   14.30
   4 -11  -1  114.99   15.20
   4 -11  -1   98.29   15.10
  -3 -11   1   41.00   11.10
  -3 -11   1   27.90   10.50
   3  11  -1   51.39   11.80
  -3 -10   1   36.60   10.00
  -3 -10   1   36.00   10.50
   3  10  -1   40.70   10.40
  -3  -9   1  400.46   22.70
  -3  -9   1  398.86   22.50
   3   9  -1  392.26   21.90
   3   9  -1  452.15   24.10
  -3  -8   1   82.79    9.30
  -3  -8   1   76.59   10.70
  -3  -8   1   64.49   10.00
   3   8  -1   81.99   11.30
   3   8  -1   82.59   11.80
  -3  -7   1   -1.90    6.30
  -3  -7   1    4.40    5.90
  -3  -7   1    1.20    3.30
   3   7  -1    0.40    5.00
   3   7  -1    4.80    6.10
   3   7  -1    0.80    5.60
  -3  -6   1  235.28   10.30
  -3  -6   1  225.28   11.30
  -3  -6   1  240.68   14.50
  -3  -6   1  227.68   14.70
   3   6  -1  227.78   13.50
   3   6  -1  229.48   14.20
   3   6  -1  230.68   14.30
  -3  -5   1  101.49    6.70
  -3  -5   1   85.79    9.50
  -3  -5   1   82.39    9.00
  -3  -5   1   97.49    7.20
  -3  -5   1   74.09    7.30
   3   5  -1  100.79    8.70
   3   5  -1   97.79    9.00
   3   5  -1   91.69    9.20
  -3  -4   1  267.97   13.00
  -3  -4   1  257.27   11.50
  -3  -4   1  284.17   13.00
  -3  -4   1  263.07   11.20
  -3  -4   1  255.07   10.70
   3   4  -1  275.17   11.70
   3   4  -1  284.67   12.80
   3   4  -1  260.17   12.40
   3   4  -1  282.17   12.40
  -3  -3   1  281.67   12.30
  -3  -3   1  285.57   10.90
  -3  -3   1  265.17   10.90
  -3  -3   1  279.57   12.10
  -3  -3   1  284.07   11.20
   3   3  -1  275.27   11.80
   3   3  -1  272.77   12.00
   3   3  -1  281.07   11.10
  -3  -2   1 1115.49   31.80
  -3  -2   1 1090.59   30.40
  -3  -2   1 1075.49   31.70
  -3  -2   1 1076.49   32.60
  -3  -2   1 1078.59   31.70
   3   2  -1 1065.79   31.80
   3   2  -1 1064.99   32.40
   3   2  -1 1025.30   32.00
   3   2  -1 1062.99   31.90
   3   2  -1 1084.99   31.70
  -3  -1   1 1349.27   39.00
  -3  -1   1 1327.67   38.30
  -3  -1   1 1364.26   38.60
  -3  -1   1 1387.16   38.60
  -3  -1   1 1410.96   38.90
   3   1  -1 1323.47   38.90
   3   1  -1 1312.07   38.80
   3   1  -1 1319.77   38.60
   3   1  -1 1352.66   38.60
   3   1  -1 1352.56   38.60
  -3   0   1 1237.08   36.70
  -3   0   1 1248.88   36.50
  -3   0   1 1322.27   36.80
  -3   0   1 1357.36   36.40
   3   0  -1 1248.08   36.70
   3   0  -1 1249.77   36.70
  -3   1   1 1332.47   38.50
  -3   1   1 1315.67   38.40
  -3   1   1 1318.47   39.10
  -3   1   1 1342.07   38.30
  -3   1   1 1342.57   38.00
  -3   1   1 1386.36   39.30
   3  -1  -1 1352.16   38.40
   3  -1  -1 1302.07   38.20
   3  -1  -1 1391.36   39.20
   3  -1  -1 1339.27   39.00
   3  -1  -1 1365.86   38.50
   3  -1  -1 1342.77   37.90
  -3   2   1 1109.59   31.20
  -3   2   1  976.00   32.70
  -3   2   1 1022.70   31.60
  -3   2   1 1089.79   32.30
  -3   2   1 1053.39   30.70
  -3   2   1 1031.90   31.00
  -3   2   1 1106.49   32.10
  -3   2   1 1085.69   31.20
   3  -2  -1 1088.19   31.50
   3  -2  -1 1098.99   31.60
   3  -2  -1 1070.69   31.10
   3  -2  -1 1110.99   31.20
   3  -2  -1 1095.59   32.30
   3  -2  -1  968.50   32.80
   3  -2  -1 1070.09   30.30
  -3   3   1  272.97   12.00
  -3   3   1  277.07   11.90
  -3   3   1  275.27   11.70
  -3   3   1  250.37   10.80
  -3   3   1  274.97   10.20
  -3   3   1  272.87   12.50
  -3   3   1  276.27   10.70
  -3   3   1  266.27   10.10
   3  -3  -1  267.17   11.40
   3  -3  -1  261.17   10.70
   3  -3  -1  269.67   11.90
   3  -3  -1  286.57   11.10
   3  -3  -1  281.27   12.90
   3  -3  -1  258.77    9.90
  -3   4   1  289.87   11.20
  -3   4   1  278.87   12.30
  -3   4   1  277.77   11.50
  -3   4   1  284.17   13.50
  -3   4   1  263.27   12.60
  -3   4   1  276.17   13.30
  -3   4   1  254.77   12.60
   3  -4  -1  278.07   11.60
   3  -4  -1  284.27   13.80
   3  -4  -1  265.27   12.90
   3  -4  -1  277.37   11.40
   3  -4  -1  274.27   10.20
  -3   5   1  109.19    9.50
  -3   5   1  100.19   10.80
  -3   5   1   89.39    9.40
  -3   5   1   99.19    9.40
  -3   5   1   95.19   10.00
  -3   5   1  109.79    8.40
  -3   5   1   88.39    9.00
   3  -5  -1   94.69    7.30
   3  -5  -1  101.39   10.20
   3  -5  -1  101.29    5.90
   3  -5  -1   99.19    9.30
   3  -5  -1   99.89    7.30
  -3   6   1  232.88   14.40
  -3   6   1  209.78   13.80
  -3   6   1  259.17   14.70
  -3   6   1  249.28   13.00
  -3   6   1  195.88   14.40
   3  -6  -1  216.48   14.20
   3  -6  -1  235.78   15.20
   3  -6  -1  243.28   13.80
   3  -6  -1  230.08   11.00
   3  -6  -1  224.28    9.10
  -3   7   1  -11.20    5.50
  -3   7   1    5.20    5.60
  -3   7   1   -1.20    6.30
  -3   7   1    4.40    5.90
  -3   7   1    1.40    5.70
   3  -7  -1   -0.90    6.30
   3  -7  -1    4.20    2.50
   3  -7  -1    3.00    6.10
  -3   8   1   78.59    9.90
  -3   8   1   83.19   12.50
  -3   8   1   75.99   10.70
  -3   8   1   82.29   11.10
   3  -8  -1   91.49   13.40
   3  -8  -1   65.39   10.60
  -3   9   1  389.46   23.50
  -3   9   1  425.46   23.80
   3  -9  -1  427.36   23.10
   3  -9  -1  413.36   23.90
  -3  10   1   44.90   11.20
   3 -10  -1   44.50   10.60
   3 -10  -1   28.90    9.50
  -3  11   1   45.40   11.70
   3 -11  -1   44.80   11.70
   3 -11  -1   31.30   11.20
  -2 -12   1    6.30    9.80
  -2 -12   1   -0.20    9.40
  -2 -11   1   -0.80    8.20
  -2 -11   1    7.50    9.70
   2  11  -1   14.50   10.00
  -2 -10   1   20.00    8.60
  -2 -10   1   20.70    9.50
   2  10  -1   24.10    9.50
  -2  -9   1   17.00    8.70
  -2  -9   1   22.80    8.60
   2   9  -1   20.30    8.50
   2   9  -1   35.00    8.40
  -2  -8   1  295.57   18.60
  -2  -8   1  265.07   17.90
  -2  -8   1  274.37   10.50
   2   8  -1  286.87   17.40
   2   8  -1  250.37   18.40
   2   8  -1  300.67   17.10
  -2  -7   1  268.97   16.70
  -2  -7   1  273.57   11.00
  -2  -7   1  266.27   16.70
  -2  -7   1  277.17   14.00
   2   7  -1  299.37   16.30
   2   7  -1  247.68   16.60
   2   7  -1  261.97   16.60
  -2  -6   1   -2.30    5.10
  -2  -6   1   -0.80    3.00
  -2  -6   1   -2.60    5.00
  -2  -6   1    6.40    3.60
  -2  -6   1    6.00    3.90
   2   6  -1    2.70    4.40
   2   6  -1    2.50    5.00
   2   6  -1    6.40    5.20
   2   6  -1   -5.60    4.60
  -2  -5   1   12.30    3.80
  -2  -5   1   12.10    3.30
  -2  -5   1    5.70    4.30
  -2  -5   1    7.40    4.60
  -2  -5   1   15.40    4.00
   2   5  -1   14.40    4.30
   2   5  -1    5.40    4.50
   2   5  -1   15.60    4.80
   2   5  -1   15.40    4.80
   2   5  -1   16.10    4.70
  -2  -4   1  385.96   14.20
  -2  -4   1  367.26   15.70
  -2  -4   1  386.66   14.90
  -2  -4   1  402.96   13.50
  -2  -4   1  388.06   15.90
   2   4  -1  418.16   15.70
   2   4  -1  390.66   15.70
   2   4  -1  386.46   15.60
   2   4  -1  387.46   15.70
   2   4  -1  361.36   14.20
  -2  -3   1    5.40    3.40
  -2  -3   1    3.90    2.70
  -2  -3   1    6.20    3.50
  -2  -3   1    3.70    2.70
  -2  -3   1    7.20    2.80
   2   3  -1    7.90    3.00
   2   3  -1    5.50    2.70
   2   3  -1    3.10    2.90
   2   3  -1    1.80    3.00
  -2  -2   1 1677.83   46.80
  -2  -2   1 1662.03   47.40
  -2  -2   1 1665.13   46.70
  -2  -2   1 1672.93   45.50
  -2  -2   1 1585.24   47.20
  -2  -2   1 1666.23   46.40
   2   2  -1 1688.33   47.40
   2   2  -1 1577.44   46.40
   2   2  -1 1618.04   47.00
  -2  -1   1  706.73   21.50
  -2  -1   1  699.13   20.50
  -2  -1   1  721.53   20.90
  -2  -1   1  662.03   20.10
  -2  -1   1  698.93   20.50
   2   1  -1  675.03   20.30
   2   1  -1  659.03   21.20
   2   1  -1  700.13   20.50
   2   1  -1  686.03   20.40
  -2   0   1    0.40    1.00
  -2   0   1    0.00    0.80
  -2   0   1   -1.00    0.90
  -2   0   1   -0.20    1.00
   2   0  -1   -1.00    0.60
   2   0  -1    1.10    1.10
  -2   1   1  663.83   19.00
  -2   1   1  685.63   19.30
  -2   1   1  664.33   19.10
  -2   1   1  681.43   19.90
  -2   1   1  675.53   18.70
  -2   1   1  683.43   19.80
   2  -1  -1  676.93   18.50
   2  -1  -1  661.23   19.50
   2  -1  -1  564.64   19.50
   2  -1  -1  644.44   19.60
   2  -1  -1  616.04   18.90
   2  -1  -1  666.83   19.00
   2  -1  -1  548.05   18.80
  -2   2   1 1600.44   45.50
  -2   2   1 1601.64   47.40
  -2   2   1 1663.63   47.00
  -2   2   1 1633.74   46.60
  -2   2   1 1646.04   45.80
  -2   2   1 1630.54   46.50
  -2   2   1 1686.03   46.80
   2  -2  -1 1666.33   46.30
   2  -2  -1 1628.24   46.20
   2  -2  -1 1619.44   46.60
   2  -2  -1 1649.33   47.00
   2  -2  -1 1629.64   47.60
   2  -2  -1 1679.23   45.70
  -2   3   1    5.00    2.30
  -2   3   1    6.50    3.80
  -2   3   1    2.50    3.00
  -2   3   1    2.60    2.90
  -2   3   1    8.30    2.70
  -2   3   1    4.80    2.90
  -2   3   1    2.50    3.00
   2  -3  -1    5.50    3.10
   2  -3  -1    8.20    3.60
   2  -3  -1    1.30    2.30
   2  -3  -1    6.00    2.50
   2  -3  -1    5.80    2.00
  -2   4   1  379.36   15.50
  -2   4   1  387.06   15.90
  -2   4   1  391.96   16.20
  -2   4   1  387.16   13.70
  -2   4   1  413.16   13.60
  -2   4   1  380.66   15.70
  -2   4   1  370.36   15.10
   2  -4  -1  387.26   16.30
   2  -4  -1  362.96   15.50
   2  -4  -1  397.76   13.80
   2  -4  -1  400.26   12.40
   2  -4  -1  390.26   13.90
  -2   5   1    8.30    4.90
  -2   5   1    5.60    4.20
  -2   5   1   10.70    3.80
  -2   5   1    9.80    4.10
  -2   5   1   14.30    4.70
   2  -5  -1   19.70    5.40
   2  -5  -1   10.30    2.30
   2  -5  -1   16.30    5.40
   2  -5  -1   10.80    3.30
   2  -5  -1   13.30    3.40
  -2   6   1    4.30    4.90
  -2   6   1   -4.40    4.30
  -2   6   1    0.30    5.10
  -2   6   1    0.00    4.50
  -2   6   1    1.30    4.80
   2  -6  -1    3.10    2.00
   2  -6  -1    2.40    4.10
   2  -6  -1    1.70    3.10
   2  -6  -1    0.10    4.70
   2  -6  -1   -1.00    4.80
  -2   7   1  244.38   16.40
  -2   7   1  303.27   17.00
  -2   7   1  258.67   16.60
  -2   7   1  253.27   16.80
  -2   7   1  256.47   14.70
   2  -7  -1  280.17   16.80
   2  -7  -1  286.87   17.30
  -2   8   1  311.37   18.30
  -2   8   1  261.97   18.10
  -2   8   1  279.87   16.70
  -2   8   1  296.47   18.50
   2  -8  -1  292.87   18.20
   2  -8  -1  259.97   18.30
  -2   9   1    8.50    7.70
  -2   9   1   14.40    7.30
   2  -9  -1   42.80    9.40
   2  -9  -1   22.50    8.50
  -2  10   1   36.20   10.40
   2 -10  -1   39.60   10.30
   2 -10  -1   20.00    9.60
  -2  11   1   10.20   10.40
   2 -11  -1   -0.30    8.30
   2 -11  -1   23.30    9.80
   2 -12  -1    0.40    9.70
   2 -12  -1   -1.90   10.00
  -1 -12   1   25.10   11.40
  -1 -12   1   15.00   11.10
  -1 -11   1   22.00   10.20
  -1 -11   1   14.10    9.20
   1  11  -1   15.30    9.70
  -1 -10   1   49.40   11.10
  -1 -10   1   45.00   10.70
   1  10  -1   38.30   10.70
  -1  -9   1   27.50    9.30
  -1  -9   1   31.60    9.10
   1   9  -1   31.00    9.00
   1   9  -1   49.00    8.70
  -1  -8   1   22.20    7.90
  -1  -8   1   17.70    3.30
  -1  -8   1   26.70    8.50
  -1  -8   1   26.70    3.60
   1   8  -1   31.20    8.60
   1   8  -1   25.50    7.70
   1   8  -1   26.30    7.30
   1   8  -1   35.50    8.20
  -1  -7   1  348.37   12.50
  -1  -7   1  331.27   14.40
  -1  -7   1  337.47   18.50
  -1  -7   1  343.37   18.60
   1   7  -1  324.27   18.20
   1   7  -1  332.57   18.00
   1   7  -1  305.37   16.40
   1   7  -1  340.27   18.60
   1   7  -1  349.87   18.20
  -1  -6   1   89.59   10.70
  -1  -6   1   72.39   10.00
  -1  -6   1   93.19    7.80
  -1  -6   1   81.19    7.80
  -1  -6   1  100.09    6.40
   1   6  -1   98.29   10.40
   1   6  -1   84.29   10.40
   1   6  -1   83.49    9.90
   1   6  -1   87.19   10.10
   1   6  -1   79.69    8.90
  -1  -5   1  636.44   23.70
  -1  -5   1  640.64   20.00
  -1  -5   1  619.84   23.70
  -1  -5   1  618.74   21.80
  -1  -5   1  613.14   21.30
   1   5  -1  626.44   21.80
   1   5  -1  633.94   23.30
   1   5  -1  672.63   23.70
   1   5  -1  601.84   23.40
   1   5  -1  663.93   23.80
  -1  -4   1  360.66   14.90
  -1  -4   1  384.56   14.50
  -1  -4   1  431.66   16.50
  -1  -4   1  396.56   16.30
   1   4  -1  417.16   16.10
   1   4  -1  393.06   15.60
   1   4  -1  400.96   14.50
   1   4  -1  425.66   16.30
   1   4  -1  391.46   16.00
  -1  -3   1 1111.69   34.20
  -1  -3   1 1079.79   33.60
  -1  -3   1 1096.89   30.90
  -1  -3   1 1103.79   33.00
  -1  -3   1 1109.49   34.20
   1   3  -1 1081.59   34.00
   1   3  -1 1114.49   33.70
   1   3  -1 1155.38   34.00
   1   3  -1 1139.09   34.10
   1   3  -1 1148.49   32.70
  -1  -2   1  238.48    8.00
  -1  -2   1  230.18    9.10
  -1  -2   1  242.98    9.40
  -1  -2   1  237.18    9.80
  -1  -2   1  223.68    9.60
   1   2  -1  228.38    9.30
   1   2  -1  253.67    9.50
   1   2  -1  241.08    9.70
   1   2  -1  243.78    8.90
   1   2  -1  238.28    9.60
  -1  -1   1 4935.01  140.19
  -1  -1   1 5177.28  140.39
  -1  -1   1 5425.36  140.79
  -1   1   1 5098.79  130.79
  -1   1   1 5224.78  131.39
  -1   1   1 4970.70  131.29
  -1   1   1 5081.19  130.49
   1  -1  -1 4544.65  130.99
   1  -1  -1 4105.79  130.49
  -1   2   1  239.88    8.70
  -1   2   1  231.78    9.10
  -1   2   1  227.58    8.60
  -1   2   1  239.28    9.70
  -1   2   1  225.48    8.90
   1  -2  -1  235.98    9.40
   1  -2  -1  225.78   10.10
   1  -2  -1  246.98    9.10
   1  -2  -1  225.78    8.00
   1  -2  -1  219.38    7.90
  -1   3   1 1072.79   33.30
  -1   3   1 1108.39   32.80
  -1   3   1 1095.59   31.10
  -1   3   1 1106.29   33.50
  -1   3   1 1105.29   34.00
  -1   3   1 1103.09   33.30
   1  -3  -1 1138.59   32.00
   1  -3  -1 1063.09   33.20
   1  -3  -1 1148.29   33.70
   1  -3  -1 1073.59   31.70
   1  -3  -1 1118.09   30.70
  -1   4   1  379.66   15.00
  -1   4   1  372.56   15.30
  -1   4   1  372.56   15.70
  -1   4   1  398.56   15.60
  -1   4   1  411.56   16.60
  -1   4   1  413.86   13.30
   1  -4  -1  393.36   15.50
   1  -4  -1  389.96   11.90
   1  -4  -1  396.86   15.90
   1  -4  -1  378.36   13.30
   1  -4  -1  417.66   13.60
  -1   5   1  627.94   23.10
  -1   5   1  636.14   23.30
  -1   5   1  601.24   22.50
  -1   5   1  620.74   23.40
   1  -5  -1  628.94   20.10
   1  -5  -1  627.04   23.10
   1  -5  -1  591.14   23.20
   1  -5  -1  659.53   20.30
   1  -5  -1  650.33   18.20
  -1   6   1   71.59   10.20
  -1   6   1   96.99   10.50
  -1   6   1   78.19    9.50
  -1   6   1   87.79    9.80
  -1   6   1   95.39    8.70
   1  -6  -1  102.59   10.60
   1  -6  -1   93.89   10.40
   1  -6  -1   88.19    6.40
  -1   7   1  316.07   18.00
  -1   7   1  330.97   18.00
  -1   7   1  364.76   21.20
  -1   7   1  338.07   16.20
  -1   7   1  332.67   17.90
   1  -7  -1  328.67   18.00
   1  -7  -1  341.67   18.80
  -1   8   1   18.40    7.10
  -1   8   1   27.40    8.40
  -1   8   1   25.00    7.20
  -1   8   1   26.30    8.10
   1  -8  -1   14.20    7.40
   1  -8  -1   32.90    8.20
  -1   9   1   25.00    7.60
  -1   9   1   39.20    9.70
   1  -9  -1   31.30    8.80
   1  -9  -1   28.80    8.80
  -1  10   1   43.10   10.60
   1 -10  -1   38.40   10.10
   1 -10  -1   25.90    9.80
  -1  11   1    1.10    9.20
   1 -11  -1   11.40    9.20
   1 -11  -1   19.50    9.40
  -1  12   1   23.10   12.00
   1 -12  -1   39.90   11.60
   1 -12  -1   38.90   12.00
   0 -12   1   -4.50    9.30
   0 -12   1   -7.40   10.00
   0 -11   1   15.60   10.00
   0 -11   1   19.30    9.50
   0  11  -1   10.50   10.10
   0 -10   1  159.78   17.20
   0 -10   1  108.69   15.90
   0  10  -1  142.79   17.50
   0  -9   1  396.86   22.50
   0  -9   1  352.16   21.50
   0   9  -1  348.57   21.80
   0   9  -1  344.47   20.90
   0  -8   1  426.96   14.60
   0  -8   1  469.65   23.20
   0  -8   1  421.46   14.40
   0  -8   1  447.76   23.00
   0   8  -1  448.56   23.10
   0   8  -1  462.15   22.80
   0   8  -1  425.16   20.90
   0   8  -1  420.76   22.40
   0  -7   1  312.47   18.00
   0  -7   1  300.57   13.90
   0  -7   1  307.17   18.00
   0  -7   1  304.27   11.80
   0  -7   1  315.77   11.80
   0   7  -1  276.67   17.20
   0   7  -1  315.07   16.40
   0   7  -1  314.07   18.20
   0   7  -1  300.07   17.40
   0   7  -1  336.07   18.20
   0  -6   1  356.36   14.80
   0  -6   1  330.87   17.20
   0  -6   1  365.06   14.60
   0  -6   1  328.97   17.30
   0   6  -1  322.77   16.80
   0   6  -1  327.97   17.00
   0   6  -1  339.17   17.00
   0   6  -1  306.07   16.70
   0   6  -1  344.07   15.40
   0  -5   1  348.87   14.10
   0  -5   1  364.46   16.50
   0  -5   1  357.36   16.40
   0  -5   1  341.97   14.40
   0   5  -1  357.86   14.50
   0   5  -1  328.57   15.70
   0   5  -1  355.56   16.20
   0   5  -1  333.97   15.80
   0   5  -1  374.06   16.30
   0   5  -1  357.16   14.40
   0  -4   1   14.00    3.60
   0  -4   1   19.00    3.60
   0  -4   1    9.00    4.30
   0  -4   1   17.80    4.50
   0   4  -1   25.00    4.00
   0   4  -1   12.20    4.10
   0   4  -1   12.80    3.90
   0   4  -1   16.50    4.50
   0   4  -1   14.70    3.50
   0   4  -1   23.60    4.50
   0  -3   1   12.00    2.20
   0  -3   1   15.90    4.10
   0  -3   1    8.10    3.40
   0  -3   1    7.90    3.00
   0  -3   1    9.80    3.30
   0   3  -1    6.20    3.40
   0   3  -1   10.00    3.10
   0   3  -1    7.10    3.00
   0   3  -1    9.30    3.50
   0   3  -1    4.70    3.10
   0   3  -1    5.40    3.40
   0  -2   1   18.30    3.20
   0  -2   1   20.60    2.50
   0  -2   1    7.60    2.50
   0  -2   1   11.30    3.10
   0  -2   1   17.00    3.60
   0   2  -1   18.20    3.10
   0   2  -1   21.90    3.70
   0   2  -1   14.70    3.00
   0   2  -1   17.80    2.80
   0   2  -1   20.20    2.80
   0   2  -1   17.20    3.30
   0  -1   1   -0.50    1.00
   0  -1   1    0.50    0.90
   0  -1   1    0.30    1.20
   0   1  -1    0.10    1.10
   0   1  -1    1.10    1.00
   0   1  -1    0.70    1.20
   0   1   1   -0.30    0.60
   0   1   1   -0.30    1.30
   0   1   1    1.30    0.70
   0  -1  -1    0.00    0.50
   0  -1  -1   -2.20    1.00
   0  -1  -1    0.40    0.70
   0   2   1   10.30    2.40
   0   2   1   20.20    4.30
   0   2   1   12.90    2.20
   0   2   1   14.00    2.50
   0   2   1   15.20    2.40
   0  -2  -1   15.10    1.70
   0  -2  -1   17.50    2.70
   0  -2  -1   13.50    2.50
   0  -2  -1   16.30    2.30
   0   3   1   11.10    4.80
   0   3   1    9.60    3.10
   0   3   1    6.60    3.10
   0   3   1    6.30    3.00
   0   3   1    5.10    2.80
   0   3   1    7.10    1.60
   0  -3  -1    6.50    3.20
   0  -3  -1    8.90    1.40
   0  -3  -1    6.30    3.10
   0  -3  -1    9.30    2.10
   0  -3  -1    8.80    2.10
   0   4   1   17.30    3.90
   0   4   1   17.30    4.00
   0   4   1   15.20    3.90
   0   4   1   13.50    3.70
   0   4   1   22.60    2.90
   0  -4  -1   15.10    2.20
   0  -4  -1   22.30    2.90
   0  -4  -1   18.10    4.10
   0  -4  -1   17.90    2.60
   0  -4  -1   15.00    4.10
   0   5   1  362.26   15.70
   0   5   1  335.77   14.90
   0   5   1  335.77   15.20
   0   5   1  353.06   15.30
   0  -5  -1  345.07   15.40
   0  -5  -1  356.96   12.30
   0  -5  -1  351.16   15.60
   0  -5  -1  348.77   12.20
   0   6   1  313.17   16.10
   0   6   1  360.46   16.70
   0   6   1  335.27   16.50
   0   6   1  348.77   16.70
   0  -6  -1  340.97   16.40
   0  -6  -1  338.37   16.80
   0  -6  -1  355.16   12.20
   0   7   1  305.97   17.10
   0   7   1  320.67   17.50
   0   7   1  342.67   17.00
   0   7   1  330.67   17.40
   0  -7  -1  302.37   17.20
   0  -7  -1  292.37   17.00
   0   8   1  382.16   20.80
   0   8   1  423.66   21.60
   0   8   1  438.16   21.40
   0  -8  -1  395.76   20.70
   0  -8  -1  397.26   21.20
   0   9   1  340.57   20.40
   0   9   1  331.27   20.60
   0  -9  -1  345.27   20.30
   0  -9  -1  357.86   20.90
   0  10   1  137.59   16.90
   0 -10  -1  138.29   16.30
   0 -10  -1  163.98   16.70
   0  11   1    3.00    9.20
   0 -11  -1   10.10    9.10
   0 -11  -1    9.70    8.70
   0  12   1    9.80   10.50
   0 -12  -1   -2.50    8.20
   0 -12  -1    9.20   10.00
   1 -12   1   81.79   20.00
   1 -12   1   80.79   14.90
   1 -11   1  175.08   19.60
   1 -11   1  165.78   18.70
  -1  11  -1  146.79   19.10
   1 -10   1   57.29   11.40
   1 -10   1   55.29   11.20
  -1  10  -1   68.49   12.80
   1  -9   1    3.90    8.30
   1  -9   1    6.20    7.10
  -1   9  -1   26.10    8.80
  -1   9  -1   16.00    7.50
   1  -8   1   -3.00    2.60
   1  -8   1    0.60    7.40
   1  -8   1   -0.10    6.50
   1  -8   1    4.40    3.40
  -1   8  -1    9.30    7.30
  -1   8  -1    4.10    6.50
  -1   8  -1    2.90    7.50
  -1   8  -1   -4.00    5.40
   1  -7   1  150.68    8.50
   1  -7   1  177.58   14.80
   1  -7   1  173.78   10.90
   1  -7   1  163.88   14.10
  -1   7  -1  192.68   14.90
  -1   7  -1  176.08   14.10
  -1   7  -1  170.38   13.20
  -1   7  -1  165.78   13.80
  -1   7  -1  211.28   15.30
   1  -6   1  924.31   33.50
   1  -6   1  966.00   30.80
   1  -6   1  935.51   28.40
   1  -6   1  920.11   30.20
   1  -6   1  939.51   33.30
  -1   6  -1  897.31   32.70
  -1   6  -1  917.61   33.20
  -1   6  -1  923.41   30.80
  -1   6  -1  850.61   32.70
  -1   6  -1  947.31   33.40
   1  -5   1   60.19    5.10
   1  -5   1   57.79    8.40
   1  -5   1   73.59    7.20
   1  -5   1   61.29    8.60
   1  -5   1   69.49    6.90
  -1   5  -1   67.59    8.50
  -1   5  -1   59.29    7.50
  -1   5  -1   80.49    7.80
  -1   5  -1   70.69    8.80
  -1   5  -1   68.39    8.50
  -1   5  -1   58.19    8.30
   1  -4   1    6.70    3.80
   1  -4   1    2.50    3.90
   1  -4   1   -0.70    2.80
   1  -4   1    0.90    3.00
  -1   4  -1    5.70    3.60
  -1   4  -1    4.10    3.80
  -1   4  -1    2.40    4.40
  -1   4  -1    3.00    3.30
  -1   4  -1    9.10    3.90
  -1   4  -1    1.80    3.50
  -1   4  -1    5.80    3.30
   1  -3   1  321.37   10.90
   1  -3   1  324.27   12.40
   1  -3   1  299.17   12.70
   1  -3   1  314.87   13.30
   1  -3   1  324.17   13.50
  -1   3  -1  306.97   13.30
  -1   3  -1  347.57   12.20
  -1   3  -1  328.57   13.60
  -1   3  -1  325.87   13.30
  -1   3  -1  326.37   13.00
  -1   3  -1  319.37   12.00
   1  -2   1   88.19    6.40
   1  -2   1   83.79    5.30
   1  -2   1   93.99    5.30
   1  -2   1   84.59    5.90
   1  -2   1   89.89    6.40
   1  -2   1   76.69    6.30
  -1   2  -1   84.09    6.20
  -1   2  -1   79.89    6.00
  -1   2  -1   95.29    5.70
  -1   2  -1   91.59    6.00
  -1   2  -1   88.89    6.70
  -1   2  -1   89.29    6.60
   1  -1   1   23.00    2.70
   1  -1   1    8.20    2.30
   1  -1   1   23.10    3.00
   1  -1   1   22.30    2.40
  -1   1  -1   15.30    2.20
  -1   1  -1   22.00    3.20
  -1   1  -1   19.90    2.80
  -1   0  -1   -2.50    0.40
   1   1   1   24.30    2.00
   1   1   1   13.30    1.70
  -1  -1  -1   19.30    2.10
  -1  -1  -1   13.40    1.60
   1   2   1   81.49    5.10
   1   2   1   86.59    4.90
   1   2   1   83.39    5.10
   1   2   1   90.49    4.70
   1   2   1   87.89    4.00
  -1  -2  -1   87.89    5.20
  -1  -2  -1   78.79    5.20
  -1  -2  -1   90.79    3.40
  -1  -2  -1   92.79    3.80
  -1  -2  -1   80.79    3.30
   1   3   1  315.27   12.30
   1   3   1  328.57   11.90
   1   3   1  327.77   12.40
   1   3   1  336.27   12.20
  -1  -3  -1  332.97   10.40
  -1  -3  -1  318.17   12.30
  -1  -3  -1  323.27   12.30
  -1  -3  -1  323.87   10.30
  -1  -3  -1  327.67   10.00
   1   4   1    5.20    3.10
   1   4   1    1.60    3.00
   1   4   1    0.30    1.90
   1   4   1   -0.30    3.10
   1   4   1    3.20    3.10
  -1  -4  -1    8.30    3.50
  -1  -4  -1    2.00    1.80
  -1  -4  -1   -0.80    3.10
  -1  -4  -1    3.50    1.90
  -1  -4  -1    1.80    1.50
   1   5   1   73.89    7.70
   1   5   1   68.49    7.60
   1   5   1   79.39    8.20
   1   5   1   69.79    7.70
  -1  -5  -1   68.79    4.60
  -1  -5  -1   68.49    3.60
  -1  -5  -1   62.49    4.50
  -1  -5  -1   69.99    8.00
  -1  -5  -1   70.39    8.00
   1   6   1  902.21   31.80
   1   6   1  893.51   31.30
   1   6   1  963.50   31.90
   1   6   1  915.61   31.80
  -1  -6  -1  931.71   26.50
  -1  -6  -1  911.61   31.90
  -1  -6  -1  883.21   31.30
   1   7   1  175.38   13.50
   1   7   1  161.98   13.00
   1   7   1  173.68   13.10
  -1  -7  -1  162.38   13.20
  -1  -7  -1  202.68   14.00
   1   8   1    1.50    6.00
   1   8   1   11.60    6.10
   1   8   1    6.50    7.00
  -1  -8  -1    1.20    5.90
  -1  -8  -1    3.80    6.50
   1   9   1   17.10    7.40
   1   9   1   22.30    8.00
  -1  -9  -1   15.80    7.40
  -1  -9  -1    6.70    7.20
   1  10   1   70.39   11.90
  -1 -10  -1   36.40    9.90
  -1 -10  -1   60.39   10.90
   1  11   1  127.49   18.40
  -1 -11  -1  152.48   17.40
  -1 -11  -1  173.28   17.70
   1  12   1   60.59   13.50
  -1 -12  -1   62.49   12.20
  -1 -12  -1   63.09   12.80
   2 -12   1   52.39   13.00
   2 -11   1   62.49   13.00
   2 -11   1   34.80   11.50
  -2  11  -1   39.40   11.60
   2 -10   1    3.30    8.30
   2 -10   1    8.40    8.50
  -2  10  -1    2.20    9.40
   2  -9   1  170.18   16.90
   2  -9   1  189.18   17.60
  -2   9  -1  167.08   17.20
  -2   9  -1  176.78   16.50
   2  -8   1   46.70    9.40
   2  -8   1   39.40    9.90
   2  -8   1   50.39    5.60
  -2   8  -1   39.30    8.90
  -2   8  -1   46.90    9.40
  -2   8  -1   49.60    9.70
  -2   8  -1   58.29   10.00
   2  -7   1  169.98   14.80
   2  -7   1  161.28   14.70
   2  -7   1  180.98    9.00
   2  -7   1  161.58   11.20
  -2   7  -1  164.88   14.30
  -2   7  -1  155.58   13.90
  -2   7  -1  179.18   14.70
  -2   7  -1  141.29   14.20
  -2   7  -1  164.18   14.40
   2  -6   1  211.38   11.50
   2  -6   1  208.68   14.00
   2  -6   1  185.78    9.70
   2  -6   1  186.58   14.00
   2  -6   1  211.48   11.70
  -2   6  -1  201.28   13.90
  -2   6  -1  207.68   19.10
  -2   6  -1  182.28   13.60
  -2   6  -1  209.18   14.10
  -2   6  -1  185.78   12.50
  -2   6  -1  194.78   13.80
   2  -5   1    9.60    3.90
   2  -5   1    3.70    4.80
   2  -5   1   15.30    3.50
   2  -5   1    1.10    4.60
   2  -5   1    8.40    4.00
  -2   5  -1    7.90    4.70
  -2   5  -1    8.40    4.40
  -2   5  -1   15.10    5.10
  -2   5  -1   18.50    5.20
  -2   5  -1    9.90    4.80
  -2   5  -1   12.50    4.40
  -2   5  -1    4.00    4.40
   2  -4   1    0.80    3.10
   2  -4   1   -1.20    3.00
   2  -4   1    3.30    4.10
   2  -4   1   -4.30    3.60
   2  -4   1   -0.90    2.60
  -2   4  -1   -0.90    3.60
  -2   4  -1   -4.60    3.30
  -2   4  -1    4.20    4.00
  -2   4  -1   -0.60    3.20
  -2   4  -1    3.60    3.80
  -2   4  -1   -0.60    3.50
  -2   4  -1   -1.00    3.60
   2  -3   1   94.09    7.50
   2  -3   1   74.49    5.80
   2  -3   1   83.29    7.70
   2  -3   1   97.19    5.70
   2  -3   1   95.59    6.10
   2  -3   1   78.29    6.70
   2  -3   1   94.19    7.10
  -2   3  -1   93.39    8.00
  -2   3  -1   90.89    7.80
  -2   3  -1   83.69    6.10
  -2   3  -1   82.19    7.40
  -2   3  -1   71.39    7.10
  -2   3  -1   99.09    6.60
  -2   3  -1   81.49    7.00
   2  -2   1  356.86   12.60
   2  -2   1  361.36   13.90
   2  -2   1  351.36   13.30
   2  -2   1  341.27   12.30
   2  -2   1  350.06   12.10
   2  -2   1  354.46   12.90
   2  -2   1  315.07   13.10
  -2   2  -1  330.87   12.70
  -2   2  -1  355.96   13.90
  -2   2  -1  334.47   13.00
  -2   2  -1  361.06   12.40
  -2   2  -1  362.96   13.50
  -2   2  -1  367.36   13.90
  -2   2  -1  339.67   10.90
   2  -1   1    6.10    2.40
   2  -1   1    6.50    2.30
   2  -1   1    9.40    2.20
   2  -1   1   10.10    2.10
  -2   1  -1    6.80    2.40
  -2   1  -1    8.50    2.30
  -2   1  -1   12.40    3.20
  -2   1  -1   10.00    2.60
   2   0   1    0.10    1.30
   2   0   1   -1.20    0.90
   2   0   1   -1.20    1.00
   2   0   1    1.00    1.60
   2   0   1   -1.20    1.50
  -2   0  -1   -1.70    1.20
  -2   0  -1   -1.10    1.70
  -2   0  -1    0.50    1.70
  -2   0  -1    0.30    1.30
  -2   0  -1   -1.20    1.70
   2   1   1    7.40    2.00
   2   1   1    5.80    1.50
   2   1   1    6.60    1.80
   2   1   1   13.30    2.30
  -2  -1  -1   10.70    1.90
  -2  -1  -1    7.90    2.00
  -2  -1  -1    7.00    1.40
  -2  -1  -1    9.20    2.10
   2   2   1  349.87   11.40
   2   2   1  331.27   11.30
   2   2   1  337.77   11.90
   2   2   1  338.77   11.30
  -2  -2  -1  358.76   12.00
  -2  -2  -1  333.77   12.00
  -2  -2  -1  332.97   10.20
  -2  -2  -1  342.07   10.50
  -2  -2  -1  345.07   11.20
   2   3   1   82.39    5.90
   2   3   1   89.59    5.00
   2   3   1   84.49    6.30
   2   3   1   94.59    6.10
  -2  -3  -1   82.59    6.30
  -2  -3  -1   82.29    4.10
  -2  -3  -1   89.29    4.30
  -2  -3  -1   83.49    4.60
  -2  -3  -1   77.39    6.40
   2   4   1   -4.20    2.70
   2   4   1    2.10    3.20
   2   4   1    0.10    2.00
   2   4   1   -1.00    2.90
  -2  -4  -1    2.30    3.40
  -2  -4  -1    2.80    3.50
  -2  -4  -1    3.50    1.80
  -2  -4  -1    2.80    1.90
  -2  -4  -1    0.00    1.60
   2   5   1   10.90    4.30
   2   5   1   14.40    4.10
   2   5   1   10.90    4.20
  -2  -5  -1    8.50    2.10
  -2  -5  -1    5.00    4.20
  -2  -5  -1    6.20    1.90
  -2  -5  -1    6.80    2.20
  -2  -5  -1    6.20    4.40
   2   6   1  204.78   12.90
   2   6   1  197.88   12.60
   2   6   1  201.88   12.30
  -2  -6  -1  203.88    7.50
  -2  -6  -1  195.78   12.70
  -2  -6  -1  202.68   12.90
   2   7   1  152.98   12.80
   2   7   1  167.38   12.70
  -2  -7  -1  164.28   13.40
  -2  -7  -1  156.28   13.10
   2   8   1   44.00    8.40
   2   8   1   43.80    8.20
  -2  -8  -1   42.60    8.70
  -2  -8  -1   40.30    8.60
   2   9   1  144.49   15.80
   2   9   1  157.78   14.20
  -2  -9  -1  148.09   14.60
  -2  -9  -1  151.28   14.60
   2  10   1    4.20    7.90
  -2 -10  -1   -5.00    7.60
  -2 -10  -1   -3.30    7.40
   2  11   1   35.30   10.90
  -2 -11  -1   29.80   10.10
  -2 -11  -1   37.90   10.80
   2  12   1   61.79   13.40
  -2 -12  -1   49.10   12.20
  -2 -12  -1   46.60   11.40
   3 -11   1   20.70   11.00
   3 -11   1   25.70   11.00
  -3  11  -1   27.60   11.30
   3 -10   1   45.40   11.20
   3 -10   1   57.09   11.90
  -3  10  -1   45.40   11.10
   3  -9   1  314.47   21.60
   3  -9   1  310.27   21.10
  -3   9  -1  316.37   21.00
  -3   9  -1  312.37   21.40
   3  -8   1   40.70    9.00
   3  -8   1   53.59    6.20
   3  -8   1   52.19   10.40
  -3   8  -1   42.90    8.90
  -3   8  -1   36.30    9.40
  -3   8  -1   45.30    9.20
  -3   8  -1   36.60    8.80
   3  -7   1  316.97   13.00
   3  -7   1  298.57   15.10
   3  -7   1  313.47   18.70
   3  -7   1  295.97   18.60
  -3   7  -1  297.37   18.30
  -3   7  -1  282.27   18.20
  -3   7  -1  292.67   17.30
  -3   7  -1  277.17   18.00
  -3   7  -1  332.27   19.00
   3  -6   1   97.39    9.30
   3  -6   1  100.99   11.80
   3  -6   1   79.99   11.00
   3  -6   1  113.69    9.70
   3  -6   1   96.19    7.60
  -3   6  -1   91.29   10.40
  -3   6  -1  101.19   11.10
  -3   6  -1   87.49   11.10
  -3   6  -1  104.89   11.90
  -3   6  -1   97.09   11.80
  -3   6  -1  105.49   11.50
   3  -5   1  358.56   17.60
   3  -5   1  373.56   15.60
   3  -5   1  377.66   15.40
   3  -5   1  334.47   16.80
   3  -5   1  336.17   14.00
  -3   5  -1  362.36   15.20
  -3   5  -1  352.46   16.60
  -3   5  -1  329.07   15.50
  -3   5  -1  325.27   16.80
  -3   5  -1  366.66   17.70
  -3   5  -1  368.46   14.70
  -3   5  -1  333.07   16.60
   3  -4   1   57.49    6.10
   3  -4   1   74.19    8.10
   3  -4   1   78.19    8.60
   3  -4   1   65.09    6.90
   3  -4   1   66.19    7.10
  -3   4  -1   74.59    7.20
  -3   4  -1   65.19    8.70
  -3   4  -1   75.89    8.30
  -3   4  -1   75.29    7.80
  -3   4  -1   75.89    8.20
  -3   4  -1   72.89    6.30
  -3   4  -1   75.59    8.70
   3  -3   1  877.71   26.10
   3  -3   1  803.62   28.10
   3  -3   1  869.11   28.00
   3  -3   1  836.42   28.90
   3  -3   1  854.31   26.20
   3  -3   1  832.52   27.00
   3  -3   1  871.71   27.50
  -3   3  -1  876.11   27.20
  -3   3  -1  881.21   28.90
  -3   3  -1  854.21   27.80
  -3   3  -1  886.81   26.90
  -3   3  -1  894.81   29.00
  -3   3  -1  862.71   25.30
  -3   3  -1  894.01   28.50
   3  -2   1 3249.77   88.49
   3  -2   1 3332.47   90.09
   3  -2   1 3013.60   88.99
   3  -2   1 3036.60   88.49
   3  -2   1 3149.49   87.79
   3  -2   1 3320.27   89.19
   3  -2   1 3212.08   87.69
  -3   2  -1 3129.49   87.79
  -3   2  -1 3089.79   88.39
  -3   2  -1 3169.28   88.19
  -3   2  -1 3073.09   89.09
  -3   2  -1 3293.17   89.89
  -3   2  -1 3165.38   89.39
  -3   2  -1 3135.29   88.59
   3  -1   1  352.46   12.00
   3  -1   1  334.47   12.50
   3  -1   1  357.86   13.00
   3  -1   1  344.07   11.70
  -3   1  -1  348.67   12.70
  -3   1  -1  333.87   12.60
  -3   1  -1  328.97   13.20
  -3   1  -1  334.67   12.00
   3   0   1  465.05   14.20
   3   0   1  433.26   15.10
   3   0   1  449.46   14.90
   3   0   1  455.45   15.50
   3   0   1  467.35   15.30
   3   0   1  437.56   14.40
   3   0   1  487.65   15.00
  -3   0  -1  488.55   15.20
  -3   0  -1  476.75   14.80
  -3   0  -1  467.95   14.40
  -3   0  -1  458.05   15.40
  -3   0  -1  487.95   15.30
  -3   0  -1  445.76   13.90
   3   1   1  340.57   11.40
   3   1   1  343.97   11.80
   3   1   1  336.77   10.50
   3   1   1  340.67   11.30
   3   1   1  346.67   10.30
   3   1   1  369.36   12.20
  -3  -1  -1  339.07   11.90
  -3  -1  -1  325.57   11.90
  -3  -1  -1  330.17   11.00
  -3  -1  -1  343.07   11.00
   3   2   1 3060.59   85.79
   3   2   1 3060.19   86.29
   3   2   1 3154.38   85.79
   3   2   1 3127.39   86.09
  -3  -2  -1 3135.09   84.89
  -3  -2  -1 2994.40   86.29
  -3  -2  -1 3160.78   84.99
  -3  -2  -1 3175.18   85.99
   3   3   1  861.91   24.20
   3   3   1  841.42   27.00
   3   3   1  870.11   26.50
   3   3   1  874.21   26.40
   3   3   1  891.21   26.10
  -3  -3  -1  866.51   25.90
  -3  -3  -1  880.01   25.10
  -3  -3  -1  860.21   26.90
  -3  -3  -1  865.61   27.00
  -3  -3  -1  834.42   24.60
   3   4   1   74.89    5.60
   3   4   1   69.79    6.70
   3   4   1   77.09    6.80
   3   4   1   73.09    6.30
  -3  -4  -1   72.89    4.00
  -3  -4  -1   73.19    7.30
  -3  -4  -1   68.59    5.00
  -3  -4  -1   56.79    6.90
  -3  -4  -1   80.59    4.30
   3   5   1  344.97   15.10
   3   5   1  349.27   14.80
   3   5   1  360.06   15.50
  -3  -5  -1  354.56   15.70
  -3  -5  -1  351.86   15.40
  -3  -5  -1  354.06   12.30
   3   6   1   87.89    9.70
   3   6   1   93.89    9.80
   3   6   1   79.99    8.80
  -3  -6  -1  104.09   10.20
  -3  -6  -1   79.29    9.60
  -3  -6  -1   91.29    5.60
   3   7   1  299.17   16.10
   3   7   1  292.27   16.80
  -3  -7  -1  298.07   16.90
  -3  -7  -1  308.07   16.80
  -3  -7  -1  297.17   10.50
   3   8   1   56.09    8.50
   3   8   1   51.39    8.70
  -3  -8  -1   30.90    8.00
  -3  -8  -1   57.19    9.00
   3   9   1  308.67   18.60
   3   9   1  328.87   20.10
  -3  -9  -1  272.37   18.60
  -3  -9  -1  297.07   18.60
   3  10   1   49.90   10.80
  -3 -10  -1   65.39   10.80
  -3 -10  -1   51.09   10.30
   3  11   1   24.70   10.50
  -3 -11  -1   45.40   10.40
  -3 -11  -1   13.40    8.70
   4 -11   1   50.49   12.40
   4 -11   1   67.09   14.10
   4 -10   1  108.69   14.50
   4 -10   1   69.39   13.40
  -4  10  -1   68.09   12.10
   4  -9   1  101.09   13.60
   4  -9   1   94.79    7.30
   4  -9   1   65.69   12.00
  -4   9  -1  101.19   13.60
   4  -8   1   18.10    8.20
   4  -8   1   18.70    4.50
   4  -8   1    9.80    7.60
  -4   8  -1   15.70    9.70
  -4   8  -1   12.90    7.90
  -4   8  -1   14.50    7.60
  -4   8  -1   21.40    8.70
  -4   8  -1    7.70    7.50
   4  -7   1   61.19    9.60
   4  -7   1   70.39    7.60
   4  -7   1   69.39   10.30
   4  -7   1   82.99    9.90
  -4   7  -1   69.09   10.40
  -4   7  -1   34.80    8.50
  -4   7  -1   79.69   11.20
  -4   7  -1   55.99    9.40
  -4   7  -1   78.39   11.20
   4  -6   1  624.74   23.30
   4  -6   1  589.74   25.90
   4  -6   1  570.84   24.90
   4  -6   1  604.24   22.60
   4  -6   1  582.54   21.00
  -4   6  -1  577.84   23.60
  -4   6  -1  587.04   25.10
  -4   6  -1  574.34   25.50
  -4   6  -1  594.04   24.70
  -4   6  -1  556.74   25.10
  -4   6  -1  593.34   23.10
  -4   6  -1  560.04   21.30
   4  -5   1   20.80    6.10
   4  -5   1   20.00    5.10
   4  -5   1   19.10    5.00
   4  -5   1   20.40    4.50
   4  -5   1   25.70    6.50
  -4   5  -1   22.30    6.10
  -4   5  -1   23.60    4.70
  -4   5  -1   33.40    7.30
  -4   5  -1   25.20    6.60
  -4   5  -1   20.70    5.30
  -4   5  -1   18.50    5.90
  -4   5  -1   27.40    6.30
   4  -4   1  993.00   32.40
   4  -4   1 1008.60   33.70
   4  -4   1  969.00   31.50
   4  -4   1 1022.40   30.50
   4  -4   1  989.50   34.50
   4  -4   1  972.10   32.70
  -4   4  -1  984.20   29.70
  -4   4  -1  989.50   33.80
  -4   4  -1 1045.70   34.60
  -4   4  -1 1052.49   34.60
  -4   4  -1 1005.50   32.20
  -4   4  -1  983.00   33.00
  -4   4  -1 1005.40   31.60
   4  -3   1   52.59    6.50
   4  -3   1   63.79    6.10
   4  -3   1   63.69    5.90
   4  -3   1   53.49    6.20
   4  -3   1   68.49    8.20
   4  -3   1   51.79    6.80
   4  -3   1   60.19    7.30
  -4   3  -1   55.39    7.30
  -4   3  -1   56.19    7.10
  -4   3  -1   59.29    6.40
  -4   3  -1   62.09    7.90
  -4   3  -1   70.69    6.30
  -4   3  -1   50.59    5.90
  -4   3  -1   52.99    7.90
   4  -2   1    9.40    3.30
   4  -2   1   14.20    3.60
   4  -2   1   12.80    4.40
   4  -2   1   12.30    4.00
   4  -2   1    5.70    3.00
   4  -2   1    9.80    3.00
   4  -2   1   12.90    3.30
  -4   2  -1   10.90    3.70
  -4   2  -1    9.90    3.20
  -4   2  -1    9.40    4.20
  -4   2  -1   13.70    3.60
  -4   2  -1   10.30    4.00
  -4   2  -1   12.40    3.90
  -4   2  -1   15.00    5.10
   4  -1   1  137.79    9.10
   4  -1   1  153.98    8.30
   4  -1   1  147.59    8.30
   4  -1   1  148.49    9.00
   4  -1   1  153.98    8.80
   4  -1   1  136.09    7.70
  -4   1  -1  141.69    8.10
  -4   1  -1  165.88    8.90
  -4   1  -1  145.89    9.80
   4   0   1   -1.60    3.00
   4   0   1   -0.10    2.90
   4   0   1    2.30    2.60
   4   0   1   -0.80    3.20
   4   0   1   -2.70    3.20
   4   0   1   -3.00    2.50
   4   0   1    2.20    2.60
  -4   0  -1    6.80    3.00
  -4   0  -1   -0.80    2.30
  -4   0  -1    1.30    3.20
  -4   0  -1   -3.10    3.10
  -4   0  -1   -0.10    3.30
  -4   0  -1   -0.40    2.60
   4   1   1  151.28    8.30
   4   1   1  149.09    7.40
   4   1   1  149.59    6.60
   4   1   1  162.48    7.80
   4   1   1  159.98    8.10
   4   1   1  146.19    7.30
  -4  -1  -1  152.58    8.00
  -4  -1  -1  136.59    8.10
  -4  -1  -1  143.09    7.00
  -4  -1  -1  145.59    7.10
   4   2   1    7.30    2.70
   4   2   1    7.40    3.30
   4   2   1   10.10    2.30
   4   2   1    8.90    2.90
   4   2   1    9.20    3.30
   4   2   1   13.20    2.30
  -4  -2  -1   13.80    3.40
  -4  -2  -1    8.70    2.40
  -4  -2  -1    7.60    2.30
  -4  -2  -1   13.00    3.30
   4   3   1   45.80    5.50
   4   3   1   65.09    5.60
   4   3   1   50.49    5.60
   4   3   1   45.90    5.60
   4   3   1   59.69    4.20
  -4  -3  -1   54.69    4.20
  -4  -3  -1   66.09    5.30
  -4  -3  -1   59.89    6.50
  -4  -3  -1   51.49    4.00
   4   4   1  985.00   30.20
   4   4   1  950.30   31.40
   4   4   1  972.10   31.00
  -4  -4  -1  999.20   29.80
  -4  -4  -1  977.00   31.40
  -4  -4  -1 1009.10   28.40
  -4  -4  -1  986.60   31.40
  -4  -4  -1  966.50   28.00
   4   5   1   18.00    4.70
   4   5   1   20.50    4.50
   4   5   1   20.60    4.80
  -4  -5  -1   14.50    5.20
  -4  -5  -1   23.20    5.20
  -4  -5  -1   18.00    3.60
   4   6   1  569.54   22.50
   4   6   1  594.84   22.30
   4   6   1  541.05   22.50
  -4  -6  -1  566.64   22.70
  -4  -6  -1  561.34   22.40
  -4  -6  -1  556.54   18.70
   4   7   1   78.69   11.30
   4   7   1   68.99    9.80
  -4  -7  -1   81.29    6.00
  -4  -7  -1   56.99    8.70
  -4  -7  -1   60.09    8.90
   4   8   1   -6.60    5.80
   4   8   1    2.50    5.60
  -4  -8  -1    7.10    6.30
  -4  -8  -1    9.30    7.00
   4   9   1   98.29   12.60
   4   9   1   88.99   11.90
  -4  -9  -1   90.29   13.20
  -4  -9  -1   74.49   10.40
   4  10   1   81.79   12.50
  -4 -10  -1  109.39   14.40
  -4 -10  -1   74.79   11.50
   4  11   1   61.39   12.90
  -4 -11  -1   71.09   12.20
  -4 -11  -1   58.99   11.50
   5 -11   1   12.60   10.80
   5 -10   1   38.50   10.60
   5 -10   1   34.90   11.80
  -5  10  -1   40.60   11.00
   5  -9   1  244.78   19.80
   5  -9   1  258.37   12.60
   5  -9   1  314.57   21.90
  -5   9  -1  305.77   21.00
   5  -8   1  167.18   17.00
   5  -8   1  148.39   16.20
   5  -8   1  184.38   10.90
  -5   8  -1  194.18   16.70
  -5   8  -1  190.68   17.90
  -5   8  -1  168.68   16.40
  -5   8  -1  183.78   16.80
   5  -7   1  664.23   25.40
   5  -7   1  596.74   27.60
   5  -7   1  608.64   29.30
   5  -7   1  664.13   23.20
  -5   7  -1  586.24   28.40
  -5   7  -1  611.04   28.30
  -5   7  -1  642.84   28.70
  -5   7  -1  665.43   28.10
  -5   7  -1  620.34   26.70
   5  -6   1   38.50    6.00
   5  -6   1   43.40    7.20
   5  -6   1   37.80    8.00
   5  -6   1   37.70    6.70
   5  -6   1   31.70    8.00
  -5   6  -1   44.80    8.90
  -5   6  -1   48.20    8.90
  -5   6  -1   51.79    8.00
  -5   6  -1   33.10    7.90
  -5   6  -1   34.80    7.70
  -5   6  -1   25.00    7.60
  -5   6  -1   56.49    8.10
   5  -5   1   94.79    7.50
   5  -5   1   97.29    9.30
   5  -5   1   54.89    8.40
   5  -5   1   86.09   10.60
   5  -5   1   86.59    8.90
   5  -5   1   79.59    8.10
  -5   5  -1   89.49    9.60
  -5   5  -1   85.29    7.10
  -5   5  -1   97.29   11.30
  -5   5  -1   73.49   10.00
  -5   5  -1   73.69   10.80
  -5   5  -1   89.79   10.60
  -5   5  -1   84.69   10.60
   5  -4   1 1065.69   38.40
   5  -4   1 1110.69   35.60
   5  -4   1 1143.59   36.90
   5  -4   1 1143.19   36.00
   5  -4   1 1141.19   37.60
   5  -4   1 1122.79   34.30
  -5   4  -1 1124.49   35.40
  -5   4  -1 1135.39   38.10
  -5   4  -1 1138.29   38.50
  -5   4  -1 1101.89   36.70
  -5   4  -1 1142.19   36.10
  -5   4  -1 1098.39   37.40
   5  -3   1  229.28   11.80
   5  -3   1  248.38   11.30
   5  -3   1  248.88    8.30
   5  -3   1  250.77   10.90
   5  -3   1  257.87   12.60
   5  -3   1  240.78   11.70
   5  -3   1  240.58   13.80
   5  -3   1  249.58   13.00
  -5   3  -1  271.97   13.40
  -5   3  -1  242.78   12.90
  -5   3  -1  240.58   13.60
  -5   3  -1  255.27   12.40
  -5   3  -1  248.48   12.30
  -5   3  -1  251.17   11.40
   5  -2   1  489.95   16.80
   5  -2   1  487.55   18.70
   5  -2   1  443.16   17.20
   5  -2   1  492.75   18.00
  -5   2  -1  434.86   17.30
  -5   2  -1  501.85   17.50
  -5   2  -1  482.55   18.30
  -5   2  -1  491.25   18.00
  -5   2  -1  478.45   16.70
  -5   2  -1  506.15   18.70
  -5   2  -1  447.16   19.10
   5  -1   1  255.87   12.20
   5  -1   1  249.78   10.60
   5  -1   1  251.97   11.60
   5  -1   1  241.38   12.10
   5  -1   1  257.87   12.10
   5  -1   1  238.58   11.10
   5  -1   1  242.98   11.00
  -5   1  -1  258.57   11.00
  -5   1  -1  262.37   11.50
  -5   1  -1  252.37   12.90
  -5   1  -1  261.37   11.40
   5   0   1  803.12   25.40
   5   0   1  763.42   26.00
   5   0   1  768.42   25.70
   5   0   1  784.22   25.20
   5   0   1  813.22   24.20
   5   0   1  772.92   24.80
   5   0   1  813.92   25.90
  -5   0  -1  756.72   24.20
  -5   0  -1  823.42   25.40
  -5   0  -1  790.02   25.40
  -5   0  -1  779.82   23.50
  -5   0  -1  783.82   24.80
  -5   0  -1  761.42   25.70
   5   1   1  269.27   10.70
   5   1   1  228.48   11.00
   5   1   1  255.57   10.70
   5   1   1  273.47   11.30
   5   1   1  273.77   10.90
   5   1   1  251.07    9.60
  -5  -1  -1  240.68   10.00
  -5  -1  -1  237.78   10.00
  -5  -1  -1  242.98   11.20
  -5  -1  -1  255.07   11.10
  -5  -1  -1  237.18    8.00
  -5  -1  -1  244.18    8.50
   5   2   1  461.45   16.90
   5   2   1  483.55   15.00
   5   2   1  450.55   17.00
   5   2   1  486.65   16.40
   5   2   1  483.05   15.60
   5   2   1  460.75   16.50
  -5  -2  -1  473.15   15.60
  -5  -2  -1  451.05   15.40
  -5  -2  -1  480.55   17.10
  -5  -2  -1  482.25   16.90
   5   3   1  264.27    9.80
   5   3   1  243.38   11.10
   5   3   1  253.67   11.30
   5   3   1  269.97   11.70
   5   3   1  244.68   10.70
  -5  -3  -1  248.68   11.70
  -5  -3  -1  237.58    9.50
  -5  -3  -1  245.88    9.30
  -5  -3  -1  253.37   11.00
   5   4   1 1080.29   35.20
   5   4   1 1111.49   34.90
   5   4   1 1118.19   34.60
   5   4   1 1121.19   34.30
  -5  -4  -1 1161.28   32.30
  -5  -4  -1 1090.99   35.10
  -5  -4  -1 1073.29   31.70
  -5  -4  -1 1098.69   33.90
  -5  -4  -1 1112.79   35.40
   5   5   1   80.29    7.60
   5   5   1   96.19    8.70
   5   5   1   99.39    8.90
   5   5   1   81.39    8.70
  -5  -5  -1   82.49    8.80
  -5  -5  -1   82.09    6.90
  -5  -5  -1   80.19    9.00
   5   6   1   36.40    6.70
   5   6   1   23.90    6.30
   5   6   1   47.30    8.30
  -5  -6  -1   39.70    7.20
  -5  -6  -1   37.50    4.90
  -5  -6  -1   40.90    7.10
   5   7   1  621.14   26.00
  -5  -7  -1  636.14   21.20
  -5  -7  -1  627.24   25.70
  -5  -7  -1  647.34   26.10
   5   8   1  175.08   15.00
   5   8   1  173.08   15.10
  -5  -8  -1  208.68   15.10
  -5  -8  -1  171.88   14.60
   5   9   1  290.47   19.00
   5   9   1  261.37   18.40
  -5  -9  -1  252.77   17.80
  -5  -9  -1  242.68   17.60
   5  10   1   28.80    9.70
  -5 -10  -1   37.70    9.70
  -5 -10  -1   50.09    9.90
   5  11   1    9.50    9.20
  -5 -11  -1   11.70    9.10
  -5 -11  -1   14.20    8.50
   6 -11   1   -6.20    9.60
   6 -10   1  271.07   23.40
   6 -10   1  311.67   23.10
  -6  10  -1  280.27   22.40
   6  -9   1    3.80    8.40
   6  -9   1   -5.50    7.70
   6  -9   1    0.80    4.60
  -6   9  -1    3.50    7.90
   6  -8   1   94.79    9.30
   6  -8   1   87.19   12.70
   6  -8   1   62.19   10.70
  -6   8  -1   89.59   12.80
  -6   8  -1   69.99   11.40
  -6   8  -1  100.89   14.40
   6  -7   1   17.50    8.40
   6  -7   1   11.30    5.40
   6  -7   1    9.40    7.90
   6  -7   1    5.40    5.70
  -6   7  -1   -0.20    7.20
  -6   7  -1   11.70    5.60
  -6   7  -1    9.00    7.80
  -6   7  -1   -2.20    7.80
  -6   7  -1    1.20    6.70
  -6   7  -1    5.40    7.30
  -6   7  -1    1.90    7.10
   6  -6   1  114.89   14.10
   6  -6   1  132.39   10.50
   6  -6   1  140.99   13.50
   6  -6   1  130.19   11.40
   6  -6   1  125.09   11.00
  -6   6  -1  137.99   14.10
  -6   6  -1  131.69   13.60
  -6   6  -1  136.09   14.60
  -6   6  -1  125.19   14.30
  -6   6  -1  130.29   13.90
  -6   6  -1  111.49   12.40
   6  -5   1   49.99    7.90
   6  -5   1   47.80    6.70
   6  -5   1   47.00    6.90
   6  -5   1   44.10    7.80
   6  -5   1   39.20    6.60
   6  -5   1   61.99    7.60
  -6   5  -1   64.39    9.20
  -6   5  -1   41.00    7.30
  -6   5  -1   51.69    7.90
  -6   5  -1   38.20    6.90
  -6   5  -1   43.60    8.40
  -6   5  -1   42.90    8.10
   6  -4   1  775.92   27.80
   6  -4   1  763.82   27.00
   6  -4   1  768.62   27.00
   6  -4   1  736.93   25.50
   6  -4   1  811.32   29.00
   6  -4   1  814.42   30.30
  -6   4  -1  752.82   28.60
  -6   4  -1  767.32   26.50
  -6   4  -1  764.22   27.30
  -6   4  -1  762.22   29.10
  -6   4  -1  795.42   28.00
  -6   4  -1  772.82   29.60
   6  -3   1  121.99    9.20
   6  -3   1  115.89    8.10
   6  -3   1  122.69    9.40
   6  -3   1  131.29   10.40
   6  -3   1  138.29    9.20
   6  -3   1  139.29   11.10
   6  -3   1  117.69    8.60
   6  -3   1  120.09    5.30
  -6   3  -1  118.29    9.40
  -6   3  -1  132.09   10.30
  -6   3  -1  117.69    8.70
  -6   3  -1  115.99   10.10
  -6   3  -1  114.59    9.70
  -6   3  -1  113.29   11.00
   6  -2   1    3.90    3.10
   6  -2   1   -0.70    2.50
   6  -2   1    4.60    4.00
   6  -2   1    5.30    3.30
   6  -2   1    2.80    3.80
   6  -2   1   -0.60    0.80
   6  -2   1   -0.80    1.10
  -6   2  -1    2.20    4.70
  -6   2  -1    3.80    3.70
  -6   2  -1    0.20    3.80
  -6   2  -1   -1.60    3.70
  -6   2  -1    4.30    4.20
  -6   2  -1   -0.30    3.20
   6  -1   1   12.90    4.50
   6  -1   1   17.00    3.70
   6  -1   1    7.90    3.90
   6  -1   1   16.30    4.00
   6  -1   1   14.30    4.60
   6  -1   1   17.50    4.00
   6  -1   1    6.40    3.30
  -6   1  -1    9.10    3.30
  -6   1  -1   12.00    4.20
  -6   1  -1   18.30    4.40
  -6   1  -1   11.40    4.10
  -6   1  -1   17.10    5.10
  -6   1  -1   18.60    4.00
   6   0   1   -3.60    3.10
   6   0   1   -0.80    3.60
   6   0   1   -3.20    2.80
   6   0   1   -3.70    3.30
   6   0   1    1.00    3.60
   6   0   1   -1.50    2.90
   6   0   1    1.70    3.00
  -6   0  -1    0.70    3.20
  -6   0  -1    0.40    2.90
  -6   0  -1   -1.70    2.50
  -6   0  -1    3.40    3.50
  -6   0  -1   -2.20    3.30
   6   1   1   18.50    4.80
   6   1   1   17.40    3.30
   6   1   1   10.90    3.60
   6   1   1    8.20    3.70
   6   1   1   12.40    3.50
   6   1   1   17.60    4.10
  -6  -1  -1   13.30    4.00
  -6  -1  -1   12.40    3.30
  -6  -1  -1   14.70    2.90
  -6  -1  -1   14.00    3.50
  -6  -1  -1   13.80    2.40
   6   2   1    7.70    3.10
   6   2   1   -0.40    2.60
   6   2   1   -1.70    3.00
   6   2   1    4.50    3.60
   6   2   1    4.40    3.20
  -6  -2  -1    6.20    4.00
  -6  -2  -1    0.20    2.30
  -6  -2  -1    1.90    2.60
   6   3   1  137.59    8.30
   6   3   1  116.29    7.40
   6   3   1  137.79    8.70
   6   3   1  117.19    8.60
   6   3   1  113.69    8.70
  -6  -3  -1  129.99    6.90
  -6  -3  -1  126.79    9.40
  -6  -3  -1  121.19    6.70
   6   4   1  776.02   26.00
   6   4   1  771.12   26.40
   6   4   1  757.52   26.10
   6   4   1  748.93   26.60
  -6  -4  -1  767.12   23.10
  -6  -4  -1  761.72   26.70
  -6  -4  -1  791.62   23.50
   6   5   1   45.30    6.10
   6   5   1   39.90    6.50
   6   5   1   43.70    7.00
   6   5   1   39.10    6.00
  -6  -5  -1   63.39    9.40
  -6  -5  -1   48.20    7.00
   6   6   1  115.89   10.60
   6   6   1  123.89   11.60
  -6  -6  -1  119.09   11.60
  -6  -6  -1  108.69   11.70
   6   7   1    4.80    6.20
   6   7   1   14.90    5.90
  -6  -7  -1    6.40    6.70
  -6  -7  -1    5.30    6.30
   6   8   1  100.59   12.00
   6   8   1  104.39   12.70
  -6  -8  -1  106.89   12.60
  -6  -8  -1   93.39   12.70
   6   9   1    0.20    7.20
   6   9   1   12.80    6.70
  -6  -9  -1   10.80    7.50
  -6  -9  -1    5.90    7.30
   6  10   1  283.37   20.40
  -6 -10  -1  285.87   19.80
  -6 -10  -1  285.27   19.70
   6  11   1   -3.30    8.30
  -6 -11  -1  -13.10    7.20
  -6 -11  -1    3.80    8.60
   7 -11   1   51.19   12.90
   7 -10   1  122.09   21.70
   7 -10   1  109.59   14.80
  -7  10  -1   97.59   15.80
   7  -9   1   30.60    6.50
   7  -9   1   41.50   11.70
   7  -9   1   70.19   12.20
  -7   9  -1   28.90   11.20
   7  -8   1  432.66   23.90
   7  -8   1  415.96   25.60
   7  -8   1  436.36   18.80
  -7   8  -1  393.76   24.30
  -7   8  -1  401.26   23.80
   7  -7   1   71.89    9.40
   7  -7   1   58.99   11.00
   7  -7   1   74.59   10.00
   7  -7   1   80.79   11.30
  -7   7  -1   88.79   11.10
  -7   7  -1   69.79   11.00
  -7   7  -1   67.89   10.60
  -7   7  -1  100.39   14.60
  -7   7  -1   54.19   10.20
  -7   7  -1   64.39   11.40
   7  -6   1  541.45   23.30
   7  -6   1  564.04   27.20
   7  -6   1  535.75   25.20
   7  -6   1  544.35   22.10
   7  -6   1  538.95   22.70
  -7   6  -1  543.45   25.90
  -7   6  -1  534.45   26.20
  -7   6  -1  522.95   25.10
  -7   6  -1  518.55   23.00
  -7   6  -1  532.05   24.80
  -7   6  -1  494.65   23.90
   7  -5   1   23.40    6.30
   7  -5   1   36.40    6.30
   7  -5   1   24.30    7.00
   7  -5   1   15.50    5.60
   7  -5   1   29.40    5.70
   7  -5   1   27.40    8.00
  -7   5  -1   29.80    7.50
  -7   5  -1   20.30    7.20
  -7   5  -1   20.10    7.00
  -7   5  -1   32.10    8.10
  -7   5  -1   42.00    9.20
  -7   5  -1   32.40    7.00
   7  -4   1 1981.10   59.39
   7  -4   1 1921.11   61.99
   7  -4   1 1880.21   58.79
   7  -4   1 1926.81   60.79
   7  -4   1 1997.60   59.99
   7  -4   1 1932.21   57.19
  -7   4  -1 1902.91   60.59
  -7   4  -1 2035.30   61.29
  -7   4  -1 1859.61   57.69
  -7   4  -1 1898.31   61.59
  -7   4  -1 1930.71   59.59
  -7   4  -1 1962.70   58.89
   7  -3   1  296.57    9.90
   7  -3   1  296.07   13.40
   7  -3   1  254.27   14.80
   7  -3   1  285.07   12.90
   7  -3   1  294.37   14.00
   7  -3   1  284.37   15.50
   7  -3   1  271.27   14.20
   7  -3   1  294.17   14.60
  -7   3  -1  287.87   15.10
  -7   3  -1  288.07   13.40
  -7   3  -1  253.27   15.20
  -7   3  -1  270.77   14.10
  -7   3  -1  299.97   14.70
  -7   3  -1  288.47   16.50
   7  -2   1 1498.05   46.80
   7  -2   1 1496.85   44.60
   7  -2   1 1200.28   45.40
   7  -2   1 1512.85   47.80
   7  -2   1 1614.74   46.40
   7  -2   1 1480.65   47.40
  -7   2  -1 1522.05   45.30
  -7   2  -1 1519.95   48.10
  -7   2  -1 1570.54   46.80
  -7   2  -1 1510.95   47.70
   7  -1   1    2.00    3.70
   7  -1   1    0.30    3.80
   7  -1   1   -2.90    3.80
   7  -1   1   -1.50    3.20
   7  -1   1    0.50    4.10
   7  -1   1    4.60    4.20
   7  -1   1    1.90    3.50
  -7   1  -1    5.60    4.50
  -7   1  -1   -4.10    4.40
  -7   1  -1   -1.90    3.40
  -7   1  -1    2.60    3.20
  -7   1  -1    0.90    3.50
  -7   1  -1   -1.10    3.70
   7   0   1  692.93   24.60
   7   0   1  674.33   24.00
   7   0   1  652.83   23.80
   7   0   1  660.23   23.30
   7   0   1  671.13   23.40
   7   0   1  643.44   22.70
   7   0   1  651.33   21.70
  -7   0  -1  633.44   23.80
  -7   0  -1  610.64   20.80
  -7   0  -1  666.93   22.70
  -7   0  -1  682.63   23.10
  -7   0  -1  670.63   22.20
   7   1   1    3.60    3.30
   7   1   1    2.00    3.80
   7   1   1    0.60    3.40
   7   1   1   -1.10    3.00
   7   1   1    3.40    3.90
   7   1   1    2.60    3.70
  -7  -1  -1    1.90    2.40
  -7  -1  -1    6.30    3.40
  -7  -1  -1    4.90    3.30
  -7  -1  -1   -3.30    2.90
  -7  -1  -1   -0.60    4.10
   7   2   1 1538.45   47.00
   7   2   1 1551.34   44.30
   7   2   1 1496.35   46.50
   7   2   1 1516.95   45.70
   7   2   1 1500.95   46.00
   7   2   1 1562.64   45.40
  -7  -2  -1 1486.95   46.50
  -7  -2  -1 1561.24   44.70
  -7  -2  -1 1439.06   44.60
   7   3   1  277.37   13.70
   7   3   1  289.67   13.50
   7   3   1  290.77   13.10
   7   3   1  274.47   13.20
   7   3   1  267.67   12.60
  -7  -3  -1  299.47   14.10
  -7  -3  -1  271.27   11.10
  -7  -3  -1  280.57   11.40
   7   4   1 1968.60   57.79
   7   4   1 1922.31   58.19
   7   4   1 1928.21   58.19
   7   4   1 1976.20   58.79
  -7  -4  -1 1886.61   54.69
  -7  -4  -1 1896.31   58.49
  -7  -4  -1 1964.50   55.19
   7   5   1   26.80    5.90
   7   5   1   26.50    5.90
   7   5   1   25.30    5.40
   7   5   1   22.60    5.90
  -7  -5  -1   29.10    6.90
  -7  -5  -1   26.00    6.50
  -7  -5  -1   29.20    3.90
   7   6   1  543.15   22.90
   7   6   1  530.05   22.00
   7   6   1  523.45   21.10
  -7  -6  -1  531.65   22.70
  -7  -6  -1  532.95   23.00
   7   7   1   55.89    8.80
   7   7   1   76.09    9.50
  -7  -7  -1   82.59   12.30
  -7  -7  -1   66.39    9.50
   7   8   1  404.56   21.60
   7   8   1  392.26   20.90
  -7  -8  -1  408.06   21.20
  -7  -8  -1  449.26   21.90
   7   9   1   26.30    8.00
   7   9   1   39.60    9.30
  -7  -9  -1   46.20    9.90
  -7  -9  -1   36.00    9.30
   7  10   1   93.49   12.90
  -7 -10  -1  101.79   15.30
  -7 -10  -1  107.19   15.40
   7  11   1   29.00   11.00
  -7 -11  -1   27.20   10.00
  -7 -11  -1   32.60   10.30
   8 -11   1    2.00   10.60
   8 -10   1  158.78   19.60
   8  -9   1   28.90    7.00
   8  -9   1   22.00    9.90
   8  -9   1   19.80    9.40
  -8   9  -1   41.90   10.50
   8  -8   1  242.08   19.40
   8  -8   1  268.77   15.40
   8  -8   1  262.17   20.80
  -8   8  -1  257.17   19.80
   8  -7   1   -2.00    6.50
   8  -7   1    5.80    5.70
   8  -7   1    3.90    5.70
   8  -7   1    8.10    7.10
  -8   7  -1   -2.60    8.30
  -8   7  -1    3.90    8.10
  -8   7  -1    8.50    7.20
  -8   7  -1   -0.10    7.30
  -8   7  -1   -6.10    7.00
  -8   7  -1   -8.40    8.10
   8  -6   1   76.19   10.80
   8  -6   1   65.59   10.20
   8  -6   1  113.89   14.50
   8  -6   1   80.29   10.90
   8  -6   1  101.99    9.50
   8  -6   1   77.29   11.20
  -8   6  -1   84.49   12.50
  -8   6  -1   77.59   10.80
  -8   6  -1   54.69    9.10
  -8   6  -1   94.19   12.80
  -8   6  -1   77.09   11.40
  -8   6  -1   60.79   10.10
   8  -5   1   85.59   10.50
   8  -5   1   85.09   12.20
   8  -5   1   95.79   13.10
   8  -5   1   91.49   10.10
   8  -5   1   88.59   10.80
   8  -5   1   75.29   10.70
  -8   5  -1  109.79   12.80
  -8   5  -1   91.99   13.30
  -8   5  -1   78.49   11.60
  -8   5  -1  116.39   13.50
  -8   5  -1   91.89   12.60
  -8   5  -1   84.49   11.30
   8  -4   1   80.49   11.50
   8  -4   1   63.39    9.00
   8  -4   1   77.19   10.80
   8  -4   1   81.39    9.50
   8  -4   1   84.79    9.90
   8  -4   1   91.59   10.20
  -8   4  -1   74.19   10.40
  -8   4  -1   69.09   10.00
  -8   4  -1   77.59   11.40
  -8   4  -1   83.39   11.40
  -8   4  -1   67.29    9.40
  -8   4  -1   94.39    9.90
   8  -3   1  183.88   12.60
   8  -3   1  185.48   11.80
   8  -3   1  215.68   13.90
   8  -3   1  184.38   11.40
   8  -3   1  194.08   12.60
  -8   3  -1  191.68   14.90
  -8   3  -1  177.28   11.40
  -8   3  -1  190.98   13.20
  -8   3  -1  192.78   12.80
  -8   3  -1  217.08   12.80
  -8   3  -1  210.78   14.30
   8  -2   1  327.37   14.30
   8  -2   1  333.67   15.40
   8  -2   1  327.27   16.70
   8  -2   1  343.37   16.10
   8  -2   1  323.47   16.70
   8  -2   1  301.47   15.60
  -8   2  -1  325.97   15.10
  -8   2  -1  277.97   16.50
  -8   2  -1  372.66   18.10
  -8   2  -1  347.67   16.00
   8  -1   1   63.99    8.80
   8  -1   1   71.19    8.30
   8  -1   1   48.30    6.80
   8  -1   1   51.99    7.20
   8  -1   1   58.19    8.00
   8  -1   1   58.79    8.30
   8  -1   1   63.29    7.10
  -8   1  -1   57.09    7.90
  -8   1  -1   57.99    8.10
  -8   1  -1   56.09    6.90
  -8   1  -1   46.30    6.10
  -8   1  -1   45.30    7.00
   8   0   1   -4.00    3.00
   8   0   1   -1.60    3.20
   8   0   1    2.20    3.90
   8   0   1   -0.90    4.60
   8   0   1   -3.30    3.90
   8   0   1   -1.20    3.60
   8   0   1    3.60    4.00
  -8   0  -1   -0.10    4.40
  -8   0  -1   -5.90    3.40
  -8   0  -1   -0.20    3.60
  -8   0  -1    3.70    4.10
  -8   0  -1    4.10    3.10
   8   1   1   52.79    6.40
   8   1   1   49.20    6.40
   8   1   1   52.49    7.70
   8   1   1   64.19    6.50
   8   1   1   51.49    7.70
   8   1   1   57.69    7.60
  -8  -1  -1   66.69    7.00
  -8  -1  -1   56.79    8.20
  -8  -1  -1   53.89    6.20
  -8  -1  -1   52.19    6.80
  -8  -1  -1   42.70    5.00
   8   2   1  331.27   15.40
   8   2   1  335.07   15.80
   8   2   1  353.76   14.90
   8   2   1  351.76   14.80
   8   2   1  316.27   14.80
  -8  -2  -1  335.47   15.80
  -8  -2  -1  316.17   13.50
  -8  -2  -1  299.47   13.30
   8   3   1  190.68   11.70
   8   3   1  204.68   11.20
   8   3   1  195.08   11.60
   8   3   1  183.28   11.90
  -8  -3  -1  176.38    9.90
  -8  -3  -1  171.98   12.10
  -8  -3  -1  205.38    9.60
   8   4   1   87.29    9.30
   8   4   1   90.49    9.80
   8   4   1   72.49    8.30
   8   4   1   74.89    9.10
  -8  -4  -1   82.79    6.40
  -8  -4  -1   73.09   10.20
  -8  -4  -1   69.49    6.10
   8   5   1   76.89   10.20
   8   5   1   85.09   10.00
   8   5   1  103.49   10.20
   8   5   1   90.59    9.60
  -8  -5  -1   85.99   11.40
   8   6   1   87.29   10.60
   8   6   1   83.99   11.30
   8   6   1   91.39   10.40
  -8  -6  -1   80.79   12.30
  -8  -6  -1   79.79   11.40
   8   7   1    1.30    5.50
   8   7   1    3.00    5.90
  -8  -7  -1    6.50    6.40
  -8  -7  -1    1.30    6.90
   8   8   1  247.68   17.60
   8   8   1  236.18   16.70
  -8  -8  -1  268.87   17.60
  -8  -8  -1  247.18   17.40
   8   9   1   45.00    9.30
   8   9   1   17.10    8.60
  -8  -9  -1   15.10    8.00
  -8  -9  -1   37.30    9.20
   8  10   1  151.08   18.20
  -8 -10  -1  167.88   16.80
  -8 -10  -1  171.08   17.10
   8  11   1   -3.30    8.50
  -8 -11  -1   -2.30    8.90
  -8 -11  -1   -3.30    8.30
   9 -11   1   42.20   13.50
   9 -10   1  142.29   19.60
   9  -9   1   74.59   13.20
   9  -9   1   56.19    8.80
   9  -9   1   32.00   13.50
  -9   9  -1   38.00   11.50
   9  -8   1  321.97   23.90
   9  -8   1  370.16   23.20
   9  -8   1  340.57   18.40
  -9   8  -1  341.87   22.40
   9  -7   1    1.90    7.70
   9  -7   1   -9.60    5.20
   9  -7   1    1.90    7.20
   9  -7   1    4.80    5.90
  -9   7  -1   -5.80    7.00
  -9   7  -1   -4.10    7.30
  -9   7  -1   -3.70    8.40
  -9   7  -1   -8.00    6.60
  -9   7  -1    2.90    8.60
   9  -6   1   25.50    7.60
   9  -6   1   27.60    9.30
   9  -6   1   15.80    7.10
   9  -6   1   38.80    8.80
   9  -6   1   18.20    6.90
   9  -6   1   16.00    6.00
  -9   6  -1   25.20    9.30
  -9   6  -1   30.10    9.10
  -9   6  -1   14.60    8.00
  -9   6  -1   34.10   10.10
  -9   6  -1   46.30    9.00
  -9   6  -1   30.10    9.50
   9  -5   1  164.08   12.90
   9  -5   1  141.99   12.00
   9  -5   1  131.59   12.80
   9  -5   1  152.38   13.00
   9  -5   1  147.99   15.20
   9  -5   1  131.89   14.20
  -9   5  -1  129.79   14.80
  -9   5  -1  145.99   13.60
  -9   5  -1  154.68   14.50
  -9   5  -1  159.88   16.30
  -9   5  -1  137.69   15.00
  -9   5  -1  130.59   14.90
   9  -4   1   90.19   12.00
   9  -4   1   80.59   10.80
   9  -4   1   72.39    9.50
   9  -4   1   90.89   11.40
   9  -4   1   75.39   10.30
   9  -4   1   75.69   10.20
  -9   4  -1   56.29   10.00
  -9   4  -1   84.39   12.20
  -9   4  -1   94.09   12.00
  -9   4  -1   76.39   10.90
  -9   4  -1   61.09    8.00
  -9   4  -1   86.09   12.60
   9  -3   1  457.95   19.60
   9  -3   1  453.35   20.50
   9  -3   1  433.06   21.10
   9  -3   1  358.46   18.60
   9  -3   1  454.85   18.60
  -9   3  -1  429.16   20.30
  -9   3  -1  472.45   22.70
  -9   3  -1  455.05   23.20
  -9   3  -1  447.66   21.80
  -9   3  -1  464.05   19.70
  -9   3  -1  418.56   19.50
   9  -2   1    7.50    4.40
   9  -2   1   16.30    5.30
   9  -2   1   10.30    5.60
   9  -2   1    9.40    5.20
   9  -2   1   23.50    6.70
   9  -2   1   -0.30    4.20
  -9   2  -1   10.30    5.90
  -9   2  -1   14.50    5.60
  -9   2  -1   12.30    5.50
  -9   2  -1    1.00    4.20
  -9   2  -1   13.30    4.90
   9  -1   1   26.10    6.80
   9  -1   1   19.50    5.70
   9  -1   1   20.90    5.60
   9  -1   1   26.40    6.40
   9  -1   1   19.10    5.10
   9  -1   1   19.60    5.50
   9  -1   1   11.00    4.40
  -9   1  -1   37.00    6.40
  -9   1  -1   22.40    6.90
  -9   1  -1   16.50    5.40
  -9   1  -1   20.00    4.60
  -9   1  -1   26.20    5.40
   9   0   1   31.10    5.90
   9   0   1   19.50    5.50
   9   0   1   35.00    5.40
   9   0   1   19.80    5.60
   9   0   1   43.80    7.20
   9   0   1   31.30    5.60
   9   0   1   36.80    6.90
  -9   0  -1   26.50    4.50
  -9   0  -1   28.60    5.60
  -9   0  -1   28.20    5.40
  -9   0  -1   26.10    5.40
  -9   0  -1   15.20    5.80
   9   1   1   15.70    6.10
   9   1   1   19.70    5.40
   9   1   1   23.30    5.80
   9   1   1   30.40    6.00
   9   1   1   19.60    5.40
  -9  -1  -1   23.20    4.80
  -9  -1  -1   22.80    4.80
  -9  -1  -1   19.50    4.40
  -9  -1  -1   15.00    5.60
  -9  -1  -1   21.30    3.60
   9   2   1   13.90    4.60
   9   2   1   12.70    6.10
   9   2   1    4.40    4.50
   9   2   1   10.70    5.00
   9   2   1    5.30    4.80
  -9  -2  -1    9.20    4.00
  -9  -2  -1    9.70    3.90
  -9  -2  -1    1.70    5.40
   9   3   1  450.85   19.90
   9   3   1  436.36   18.90
   9   3   1  448.66   18.50
   9   3   1  460.35   19.60
  -9  -3  -1  468.65   20.20
  -9  -3  -1  432.56   16.60
  -9  -3  -1  411.86   16.70
   9   4   1   77.49    9.40
   9   4   1   54.49    8.40
   9   4   1   70.69    9.90
   9   4   1   75.89    9.90
  -9  -4  -1   88.19   11.20
  -9  -4  -1   74.49    6.70
   9   5   1  142.89   13.80
   9   5   1  134.69   11.70
   9   5   1  135.69   11.20
   9   5   1  159.68   12.90
  -9  -5  -1  149.69   13.60
   9   6   1   30.70    7.00
   9   6   1   35.30    7.70
   9   6   1   25.00    7.10
  -9  -6  -1   24.10    8.00
  -9  -6  -1   45.50    8.40
   9   7   1   -1.20    5.20
   9   7   1    4.00    6.20
  -9  -7  -1    6.50    7.20
  -9  -7  -1  -13.70    5.50
   9   8   1  322.47   20.30
   9   8   1  346.37   19.70
  -9  -8  -1  338.67   20.40
  -9  -8  -1  355.06   20.30
   9   9   1   41.00   10.10
  -9  -9  -1   56.09   10.90
  -9  -9  -1   41.30   10.00
   9  10   1  166.08   18.30
  -9 -10  -1  153.48   16.80
  -9 -10  -1  149.79   17.00
   9  11   1   40.00   11.70
  -9 -11  -1   33.90   10.60
  -9 -11  -1   26.60   10.60
  10 -10   1  117.59   17.10
  10  -9   1   59.19   12.70
  10  -9   1   40.50    8.60
  10  -8   1   79.19   10.50
  10  -8   1   77.59   13.00
  10  -8   1   83.39   12.90
 -10   8  -1   66.19   11.60
  10  -7   1   11.20    6.10
  10  -7   1    0.10    6.20
  10  -7   1   14.50    8.20
  10  -7   1    2.30    7.60
 -10   7  -1   11.20   11.30
 -10   7  -1   -4.80    8.60
 -10   7  -1   10.80    8.20
  10  -6   1   31.90    8.30
  10  -6   1   26.10    7.60
  10  -6   1   27.10    6.60
  10  -6   1    7.30    8.40
  10  -6   1   24.90    8.90
 -10   6  -1   17.10    9.00
 -10   6  -1   18.30    8.20
 -10   6  -1   26.20    9.00
 -10   6  -1   10.30    7.70
 -10   6  -1    7.90    9.10
 -10   6  -1   30.00   10.50
  10  -5   1    0.80    5.40
  10  -5   1    1.60    6.90
  10  -5   1    5.10    6.70
  10  -5   1   -5.10    5.20
  10  -5   1   -1.30    6.00
  10  -5   1   -2.20    7.00
 -10   5  -1   -7.50    6.30
 -10   5  -1   -7.90    7.60
 -10   5  -1    5.20    8.20
 -10   5  -1    9.50    8.30
 -10   5  -1   -8.70    6.40
 -10   5  -1    2.70    6.80
  10  -4   1    5.60    5.80
  10  -4   1   18.60    7.00
  10  -4   1   21.10    6.60
  10  -4   1   20.70    6.50
  10  -4   1   21.40    7.80
 -10   4  -1   13.90    6.60
 -10   4  -1   18.20    6.60
 -10   4  -1   20.80    8.80
 -10   4  -1   29.60    8.40
 -10   4  -1   17.00    6.90
 -10   4  -1    8.50    8.00
  10  -3   1   41.50    8.00
  10  -3   1   46.80    7.50
  10  -3   1   56.69    9.40
  10  -3   1   68.89   10.20
  10  -3   1   56.19    8.10
 -10   3  -1   54.69    9.90
 -10   3  -1   41.50    7.40
 -10   3  -1   64.49   10.40
 -10   3  -1   47.00    8.30
 -10   3  -1   51.39    8.60
  10  -2   1  265.87   15.50
  10  -2   1  242.88   15.70
  10  -2   1  248.18   16.10
  10  -2   1  286.17   15.30
  10  -2   1  271.67   16.40
 -10   2  -1  284.47   14.00
 -10   2  -1  309.87   18.30
 -10   2  -1  284.17   15.90
 -10   2  -1  276.07   15.10
 -10   2  -1  194.68   13.00
  10  -1   1   26.20    5.60
  10  -1   1   10.30    4.80
  10  -1   1   28.40    7.50
  10  -1   1   32.30    6.50
  10  -1   1   27.20    7.10
  10  -1   1   35.30    7.40
 -10   1  -1   15.90    5.90
 -10   1  -1   30.20    6.40
 -10   1  -1   27.70    6.10
 -10   1  -1   24.70    5.20
 -10   1  -1   20.20    6.80
  10   0   1   -7.30    4.20
  10   0   1   -2.60    4.70
  10   0   1   -4.50    3.80
  10   0   1   -0.30    4.90
  10   0   1   -4.40    4.70
  10   0   1    5.30    5.30
 -10   0  -1   -1.30    3.80
 -10   0  -1   -2.60    5.60
 -10   0  -1   -0.50    4.40
 -10   0  -1    1.80    4.40
 -10   0  -1    4.50    5.40
  10   1   1   30.50    6.60
  10   1   1   22.40    5.80
  10   1   1   14.70    5.40
  10   1   1   25.60    6.90
  10   1   1   17.70    5.60
 -10  -1  -1   21.80    6.30
 -10  -1  -1   11.50    4.60
 -10  -1  -1   18.60    3.80
 -10  -1  -1   24.10    5.30
 -10  -1  -1   24.90    5.40
  10   2   1  285.27   15.60
  10   2   1  263.87   14.80
  10   2   1  279.67   15.80
  10   2   1  295.67   15.00
  10   2   1  288.57   15.30
 -10  -2  -1  276.57   16.00
 -10  -2  -1  266.17   13.40
 -10  -2  -1  287.07   13.40
  10   3   1   42.20    8.40
  10   3   1   57.69    7.70
  10   3   1   51.09    7.40
  10   3   1   52.89    7.80
 -10  -3  -1   39.30    7.50
 -10  -3  -1   50.39    7.10
 -10  -3  -1   63.79    7.40
  10   4   1   10.70    5.30
  10   4   1   10.60    5.90
  10   4   1   24.10    7.40
  10   4   1   19.50    6.40
 -10  -4  -1   21.60    4.40
 -10  -4  -1   14.20    7.10
  10   5   1   -3.70    5.40
  10   5   1    9.30    6.70
  10   5   1   -4.10    4.60
 -10  -5  -1   -2.30    6.90
  10   6   1   23.00    7.50
  10   6   1   12.50    6.90
  10   6   1   20.40    6.30
 -10  -6  -1   31.10    8.20
 -10  -6  -1   13.40    7.80
  10   7   1   -0.10    6.10
  10   7   1    6.90    6.80
  10   7   1   -4.50    5.30
 -10  -7  -1   14.50    7.40
 -10  -7  -1    5.40    7.90
  10   8   1   81.09   11.20
  10   8   1   82.19   11.90
 -10  -8  -1   83.19   12.00
 -10  -8  -1   84.39   11.70
  10   9   1   40.00    9.90
 -10  -9  -1   50.39   11.00
 -10  -9  -1   43.20   10.40
  10  10   1  130.19   17.40
 -10 -10  -1   90.79   13.50
 -10 -10  -1   92.89   13.10
  11 -10   1    3.20   10.60
  11  -9   1   25.60   10.80
  11  -9   1   18.60    7.80
  11  -8   1   12.20    7.70
  11  -8   1    4.30    8.50
 -11   8  -1   14.20   10.10
  11  -7   1   16.30    7.80
  11  -7   1   13.80    5.50
  11  -7   1    8.30    8.20
  11  -7   1   15.40    9.00
 -11   7  -1    3.20    8.40
  11  -6   1  502.25   20.90
  11  -6   1  521.85   24.90
  11  -6   1  525.15   27.90
  11  -6   1  477.75   24.40
  11  -6   1  525.55   27.10
 -11   6  -1  523.05   26.30
 -11   6  -1  451.15   27.50
 -11   6  -1  495.95   27.30
 -11   6  -1  511.15   26.10
 -11   6  -1  516.75   24.40
 -11   6  -1  556.84   28.30
  11  -5   1 1064.69   38.40
  11  -5   1 1051.69   36.00
  11  -5   1 1043.80   41.20
  11  -5   1 1022.90   38.90
  11  -5   1 1014.80   41.40
  11  -5   1 1080.19   39.40
 -11   5  -1 1028.00   39.20
 -11   5  -1  974.80   37.10
 -11   5  -1 1042.60   40.80
 -11   5  -1 1118.99   43.00
 -11   5  -1 1070.19   39.30
 -11   5  -1 1004.90   41.30
  11  -4   1  174.28   14.00
  11  -4   1  168.88   15.20
  11  -4   1  175.78   14.60
  11  -4   1  190.78    8.70
  11  -4   1  182.28   14.30
  11  -4   1  200.38   16.70
 -11   4  -1  178.28   16.40
 -11   4  -1  202.48   18.50
 -11   4  -1  175.88   15.30
 -11   4  -1  181.18   17.60
 -11   4  -1  203.18   16.70
  11  -3   1  133.59   14.20
  11  -3   1  129.29   14.10
  11  -3   1  127.69   12.30
  11  -3   1  129.89   12.70
  11  -3   1  136.09   14.00
 -11   3  -1   90.19   11.10
 -11   3  -1  108.09   13.00
 -11   3  -1  115.39   15.90
 -11   3  -1  115.69   15.10
 -11   3  -1  141.39   14.00
 -11   3  -1  112.59   12.30
  11  -2   1  883.61   33.60
  11  -2   1  904.51   34.00
  11  -2   1  932.91   35.50
  11  -2   1  877.11   35.10
  11  -2   1  907.61   35.10
 -11   2  -1  948.51   33.60
 -11   2  -1  917.71   36.20
 -11   2  -1  946.11   34.00
 -11   2  -1  908.21   31.40
 -11   2  -1  905.91   32.40
  11  -1   1  253.37   16.40
  11  -1   1  245.28   15.30
  11  -1   1  262.07   15.80
  11  -1   1  244.48   16.20
  11  -1   1  260.77   15.20
  11  -1   1  278.17   16.70
 -11   1  -1  224.98   14.80
 -11   1  -1  259.87   17.80
 -11   1  -1  231.88   14.80
 -11   1  -1  268.67   16.00
 -11   1  -1  266.47   13.80
  11   0   1 4251.27  120.59
  11   0   1 4024.50  120.39
  11   0   1 4029.40  119.09
  11   0   1 4203.48  122.39
  11   0   1 4182.98  121.69
  11   0   1 4108.99  121.99
 -11   0  -1 4176.28  119.19
 -11   0  -1 4267.37  121.79
 -11   0  -1 4121.99  116.19
 -11   0  -1 4270.07  119.29
 -11   0  -1 4098.49  117.39
  11   1   1  279.87   16.10
  11   1   1  268.57   15.60
  11   1   1  291.67   15.50
  11   1   1  260.97   16.20
  11   1   1  248.38   15.40
  11   1   1  254.67   17.00
 -11  -1  -1  264.87   11.30
 -11  -1  -1  268.87   14.30
 -11  -1  -1  277.37   16.60
 -11  -1  -1  235.88   14.00
 -11  -1  -1  256.57   12.40
  11   2   1  893.81   32.80
  11   2   1  931.51   33.10
  11   2   1  903.31   31.90
  11   2   1  835.02   33.70
  11   2   1  917.51   33.50
 -11  -2  -1  871.31   30.30
 -11  -2  -1  878.01   33.50
 -11  -2  -1  918.01   30.60
  11   3   1  138.89   11.90
  11   3   1  110.19   12.10
  11   3   1  139.89   13.50
  11   3   1  120.39   12.30
 -11  -3  -1  118.69   13.60
 -11  -3  -1  125.59    9.60
  11   4   1  180.68   14.20
  11   4   1  178.28   14.20
  11   4   1  180.48   13.20
  11   4   1  190.68   15.10
 -11  -4  -1  197.28   16.10
 -11  -4  -1  175.58   10.50
  11   5   1 1078.99   39.20
  11   5   1 1040.80   37.80
  11   5   1 1052.79   38.70
 -11  -5  -1 1102.49   39.30
  11   6   1  547.95   24.70
  11   6   1  481.85   23.10
  11   6   1  523.95   24.00
 -11  -6  -1  483.45   24.30
  11   7   1   15.30    7.60
  11   7   1    5.40    6.60
  11   7   1   15.50    6.80
 -11  -7  -1   17.20    8.50
 -11  -7  -1   13.50    7.60
  11   8   1    8.20   10.70
  11   8   1   17.80    7.80
 -11  -8  -1   17.30    8.70
 -11  -8  -1    7.20    8.00
  11   9   1   11.80    8.60
 -11  -9  -1   11.70    8.80
 -11  -9  -1   27.50    9.20
  11  10   1    7.00    9.00
 -11 -10  -1    7.10    9.10
 -11 -10  -1   -0.70    8.30
  12  -9   1   98.39   14.20
  12  -9   1   84.19   14.50
  12  -8   1  219.38   21.90
  12  -8   1  212.98   17.80
  12  -7   1   83.59   12.90
  12  -7   1   87.49   10.20
  12  -7   1   90.99   14.40
  12  -7   1   84.79   12.30
 -12   7  -1   70.99   12.10
  12  -6   1   14.50    7.70
  12  -6   1    7.90    6.40
  12  -6   1   18.90    9.30
  12  -6   1    8.10    6.70
  12  -6   1    9.50    7.70
 -12   6  -1    7.10    7.30
 -12   6  -1   -2.50    9.20
 -12   6  -1    2.10    9.60
 -12   6  -1   24.60   11.90
  12  -5   1  132.09   13.80
  12  -5   1  124.19   14.60
  12  -5   1  124.39   15.50
  12  -5   1  110.69   13.00
  12  -5   1   93.99   12.10
  12  -5   1  120.99   15.70
 -12   5  -1  134.99   15.20
 -12   5  -1  103.99   14.90
 -12   5  -1  118.39   16.80
 -12   5  -1  105.49   15.20
 -12   5  -1  125.19   16.30
 -12   5  -1  125.29   14.80
  12  -4   1   27.70    7.60
  12  -4   1   15.60    9.20
  12  -4   1   30.70    7.80
  12  -4   1   33.70    8.20
  12  -4   1   22.30    9.60
  12  -4   1   34.50    5.10
 -12   4  -1   26.80    8.80
 -12   4  -1   23.90    9.50
 -12   4  -1   25.40   10.20
 -12   4  -1   37.20   10.90
 -12   4  -1   17.00    7.20
  12  -3   1   67.49    9.70
  12  -3   1   51.19   10.20
  12  -3   1   38.50    9.70
  12  -3   1   50.69    9.90
  12  -3   1   50.49    8.90
 -12   3  -1   61.49    9.90
 -12   3  -1   83.69   12.50
 -12   3  -1   49.70    9.30
 -12   3  -1   51.09   10.80
 -12   3  -1   45.30    8.50
  12  -2   1  123.09   14.00
  12  -2   1  112.19   13.00
  12  -2   1  141.09   14.00
  12  -2   1  146.09   13.50
  12  -2   1  134.79   14.20
 -12   2  -1  134.59   16.30
 -12   2  -1  135.09   13.50
 -12   2  -1  148.29   13.90
 -12   2  -1  106.89   13.80
 -12   2  -1  121.29   12.70
  12  -1   1   22.50    8.20
  12  -1   1   10.90    6.70
  12  -1   1   34.60    8.40
  12  -1   1   18.40    8.50
  12  -1   1   22.10    6.60
  12  -1   1    5.30    6.50
 -12   1  -1   14.90    6.80
 -12   1  -1    4.50    8.40
 -12   1  -1   -0.20    6.50
 -12   1  -1   22.90    6.40
 -12   1  -1   16.20    6.60
  12   0   1   -1.10    6.00
  12   0   1   -6.20    4.90
  12   0   1   -1.60    5.80
  12   0   1    6.00    6.80
  12   0   1    4.70    6.40
  12   0   1   -1.60    5.50
 -12   0  -1    0.60    5.30
 -12   0  -1    6.00    5.40
 -12   0  -1    3.20    6.50
 -12   0  -1   -1.50    6.80
 -12   0  -1   11.30    5.30
  12   1   1   14.10    7.50
  12   1   1    8.10    6.30
  12   1   1    5.70    5.50
  12   1   1   16.00    6.60
  12   1   1   32.10    8.20
  12   1   1   19.90    6.50
 -12  -1  -1   16.20    6.00
 -12  -1  -1    8.00    7.30
 -12  -1  -1   16.20    5.40
 -12  -1  -1   10.20    4.40
 -12  -1  -1   17.80    6.00
  12   2   1   99.89   12.40
  12   2   1  133.19   13.00
  12   2   1  121.89   12.80
  12   2   1  136.39   13.10
  12   2   1  146.39   14.90
 -12  -2  -1  139.79   12.50
 -12  -2  -1  140.19   14.70
 -12  -2  -1  138.89   11.10
  12   3   1   47.80    9.80
  12   3   1   37.60    8.10
  12   3   1   50.89    8.50
  12   3   1   71.09   10.40
 -12  -3  -1   40.30    6.20
 -12  -3  -1   50.99    9.70
  12   4   1   34.80    9.50
  12   4   1   26.00    8.30
  12   4   1   27.10    7.10
  12   4   1   33.90    8.10
 -12  -4  -1   21.80    8.60
  12   5   1  122.99   14.00
  12   5   1   94.09   14.10
  12   5   1  126.19   12.50
 -12  -5  -1  108.79   14.90
  12   6   1    0.40    5.60
  12   6   1    0.90    6.60
  12   6   1   13.30    7.20
 -12  -6  -1    5.80    8.00
  12   7   1  102.79   14.50
  12   7   1  128.49   14.70
  12   7   1   72.29   10.40
 -12  -7  -1   99.69   14.50
 -12  -7  -1   74.39   11.70
  12   8   1  239.38   19.30
 -12  -8  -1  215.28   18.00
 -12  -8  -1  243.28   19.40
  12   9   1   85.79   13.20
 -12  -9  -1   87.19   12.60
 -12  -9  -1   93.49   13.40
  12  10   1   15.80   10.10
 -12 -10  -1   -0.60    8.60
 -12 -10  -1   16.50   10.20
  13  -9   1   56.69   11.20
  13  -8   1   26.00   10.10
  13  -8   1   33.10   11.30
  13  -7   1  111.99   15.80
  13  -7   1   95.09   14.30
  13  -7   1   88.09   11.20
  13  -6   1    2.90    6.50
  13  -6   1   19.40    8.90
  13  -6   1    3.10    7.80
  13  -6   1   -1.30    7.90
 -13   6  -1  -11.00    7.50
 -13   6  -1  -11.40    9.60
  13  -5   1  227.78   16.20
  13  -5   1  274.07   18.30
  13  -5   1  232.58   19.80
  13  -5   1  219.48   17.60
  13  -5   1  238.48   19.30
  13  -5   1  219.88   19.50
 -13   5  -1  229.38   17.90
 -13   5  -1  197.28   21.00
 -13   5  -1  224.98   19.40
 -13   5  -1  248.78   19.90
 -13   5  -1  269.47   21.80
  13  -4   1    9.40    7.90
  13  -4   1   13.80    9.00
  13  -4   1    6.40    7.40
  13  -4   1   12.70    4.90
  13  -4   1    0.70    6.00
  13  -4   1    5.50    6.10
 -13   4  -1   21.90   10.20
 -13   4  -1   25.70    9.70
 -13   4  -1   -6.40    8.40
 -13   4  -1    0.30    6.90
 -13   4  -1    1.00    7.50
 -13   4  -1   18.20    7.80
  13  -3   1   17.20    7.00
  13  -3   1   -1.60    7.00
  13  -3   1   -7.40    8.00
  13  -3   1   15.90    7.70
  13  -3   1    5.80    7.20
 -13   3  -1   -2.30    6.30
 -13   3  -1   12.70    7.40
 -13   3  -1    3.40    8.30
 -13   3  -1   -6.40    8.60
 -13   3  -1    5.80    8.10
  13  -2   1   24.90    8.10
  13  -2   1   15.60    6.50
  13  -2   1   23.20    8.20
  13  -2   1   30.10    8.60
  13  -2   1    3.80    8.50
 -13   2  -1   11.50    9.50
 -13   2  -1   12.30    8.40
 -13   2  -1   14.50    7.20
 -13   2  -1   18.80    7.70
 -13   2  -1   16.70    7.20
  13  -1   1  144.69   14.70
  13  -1   1  131.09   14.20
  13  -1   1  148.69   13.20
  13  -1   1  120.59   13.50
  13  -1   1  116.89   15.40
  13  -1   1  114.49   13.50
 -13   1  -1  118.89   13.00
 -13   1  -1  131.39   13.70
 -13   1  -1  138.89   12.40
 -13   1  -1  136.59   16.30
 -13   1  -1  119.59   13.70
  13   0   1   15.20    8.90
  13   0   1   22.60    7.70
  13   0   1   17.50    6.70
  13   0   1   -6.80    6.10
  13   0   1    2.40    6.50
  13   0   1   20.80    8.30
 -13   0  -1    4.30    5.50
 -13   0  -1    7.40    6.80
 -13   0  -1   15.10    7.30
 -13   0  -1    9.20    8.40
 -13   0  -1   14.40    6.70
  13   1   1  128.19   13.90
  13   1   1  133.99   13.70
  13   1   1  137.19   13.10
  13   1   1  132.19   13.70
  13   1   1  145.99   16.00
  13   1   1  139.89   13.90
 -13  -1  -1  129.49   10.20
 -13  -1  -1  129.19    9.20
 -13  -1  -1  139.89   12.20
 -13  -1  -1  137.09   15.30
 -13  -1  -1  123.59   12.40
  13   2   1   14.50    7.40
  13   2   1   11.40    6.80
  13   2   1   25.10    9.30
  13   2   1   22.90    7.70
  13   2   1   15.40    6.90
 -13  -2  -1   11.00    7.20
 -13  -2  -1   20.60    6.20
  13   3   1    0.80    6.60
  13   3   1    7.70    6.30
  13   3   1    1.10    8.20
  13   3   1    3.00    6.50
 -13  -3  -1   -0.70    8.10
 -13  -3  -1    2.70    4.70
  13   4   1    7.70    6.00
  13   4   1   -2.20    7.30
  13   4   1   -0.10    6.50
 -13  -4  -1    9.50    8.30
  13   5   1  232.58   16.20
  13   5   1  239.58   18.00
  13   5   1  221.38   17.40
 -13  -5  -1  201.68   18.00
  13   6   1   -1.20    7.20
  13   6   1    8.60    7.00
  13   6   1    2.90    5.80
 -13  -6  -1   -9.00    8.00
  13   7   1  113.39   14.70
  13   7   1   91.59   12.80
 -13  -7  -1   79.29   12.60
 -13  -7  -1  108.39   15.10
  13   8   1   36.00   10.10
 -13  -8  -1   22.20    9.80
 -13  -8  -1   35.10   10.20
  13   9   1   74.89   13.00
 -13  -9  -1   56.19   12.00
 -13  -9  -1   47.00   12.00
  14  -9   1    7.70    9.50
  14  -8   1   53.29   12.30
  14  -7   1  189.98   14.10
  14  -7   1  217.88   20.00
  14  -7   1  209.58   21.20
  14  -6   1  152.98   14.70
  14  -6   1  150.28   17.20
  14  -6   1  143.09   18.40
 -14   6  -1  112.29   15.00
  14  -5   1   87.39   11.10
  14  -5   1   76.59   13.20
  14  -5   1   79.59   13.50
  14  -5   1   79.39   16.10
  14  -5   1   79.49   15.40
 -14   5  -1   94.69   13.00
 -14   5  -1   77.69   13.30
 -14   5  -1   43.60   14.50
  14  -4   1   17.60    9.30
  14  -4   1   -4.50    6.50
  14  -4   1   -2.30    8.20
  14  -4   1   11.00    7.00
  14  -4   1   -3.10    5.70
 -14   4  -1   15.20    9.20
 -14   4  -1   -0.20    8.10
 -14   4  -1   -0.90    6.90
 -14   4  -1    5.90   10.20
 -14   4  -1   -4.70    7.40
  14  -3   1    7.10    8.10
  14  -3   1  -12.70    5.20
  14  -3   1    4.40    9.10
  14  -3   1   -2.10    7.60
  14  -3   1   -7.30    6.90
 -14   3  -1   -9.40    8.50
 -14   3  -1   -7.50    6.30
 -14   3  -1    5.00    7.30
 -14   3  -1   -4.00    7.30
 -14   3  -1   -5.80    9.10
  14  -2   1   -3.00    6.60
  14  -2   1   -3.30    5.80
  14  -2   1   14.40    7.80
  14  -2   1    8.50    8.00
  14  -2   1    9.50    9.50
 -14   2  -1   -3.30    6.30
 -14   2  -1   -3.90    8.40
 -14   2  -1    8.30    9.30
 -14   2  -1   -2.60    7.20
 -14   2  -1    4.80    7.10
  14  -1   1   -6.70    5.80
  14  -1   1   -4.40    5.20
  14  -1   1   10.70    7.30
  14  -1   1   -3.60    7.10
  14  -1   1    1.10    8.60
  14  -1   1    3.70    6.90
 -14   1  -1   -0.50    6.70
 -14   1  -1   14.70    7.20
 -14   1  -1   11.50    9.60
 -14   1  -1   -0.80    6.10
 -14   1  -1   -1.20    7.80
  14   0   1    3.90    8.80
  14   0   1  -10.40    5.90
  14   0   1    1.80    6.70
  14   0   1    3.50    7.20
  14   0   1    6.40    7.00
  14   0   1    4.20    5.90
 -14   0  -1   -9.10    5.30
 -14   0  -1    0.50    6.10
 -14   0  -1   -6.50    8.50
 -14   0  -1    4.00    6.20
 -14   0  -1    4.90    7.20
  14   1   1    0.90    6.00
  14   1   1    2.80    7.00
  14   1   1   -3.10    7.90
  14   1   1    0.50    6.10
  14   1   1   -4.60    6.10
  14   1   1    6.50    6.90
 -14  -1  -1    0.90    4.60
 -14  -1  -1   -1.60    5.40
 -14  -1  -1   -3.40    5.50
 -14  -1  -1    9.80    8.70
  14   2   1   -2.00    8.40
  14   2   1    5.90    7.50
  14   2   1    7.40    7.20
  14   2   1    0.70    5.90
  14   2   1    6.70    6.80
  14   2   1    1.80    6.10
 -14  -2  -1    2.00    5.30
 -14  -2  -1    0.00    7.80
  14   3   1    2.00    8.50
  14   3   1    4.30    6.50
  14   3   1    3.20    6.90
  14   3   1   -5.50    5.70
 -14  -3  -1    2.30    5.30
 -14  -3  -1   -4.00    7.70
  14   4   1    0.60    6.00
  14   4   1    7.40    7.20
  14   4   1   -9.20    7.60
 -14  -4  -1    1.60    7.80
  14   5   1   47.70   11.10
  14   5   1   98.19   13.20
  14   5   1   87.29   11.80
 -14  -5  -1  102.99   13.90
  14   6   1  160.48   16.80
  14   6   1  151.58   17.30
  14   6   1  200.48   24.20
 -14  -6  -1  137.29   17.30
  14   7   1  182.78   17.80
  14   7   1  168.78   17.80
 -14  -7  -1  183.88   18.50
 -14  -7  -1  248.58   19.70
  14   8   1   94.49   14.20
  14   8   1   82.79   12.90
 -14  -8  -1   79.39   13.20
 -14  -8  -1   89.19   13.30
  14   9   1   17.00    9.90
 -14  -9  -1    2.90    9.70
 -14  -9  -1    1.40    9.10
  15  -9   1  140.19   19.40
  15  -8   1   11.70   10.50
  15  -7   1   60.49   12.90
  15  -7   1   64.99    9.00
  15  -6   1  137.99   14.90
  15  -6   1  117.59   19.60
  15  -6   1  111.09   15.50
 -15   6  -1  171.28   22.00
  15  -5   1  429.46   27.20
  15  -5   1  434.66   22.40
  15  -5   1  373.16   25.10
 -15   5  -1  424.66   26.00
  15  -4   1  138.99   20.80
  15  -4   1   98.79   13.90
  15  -4   1   96.69   14.40
  15  -4   1  114.19   16.60
  15  -4   1  100.09   14.00
  15  -4   1  144.49   15.00
 -15   4  -1  128.19   19.40
 -15   4  -1   85.29   12.60
 -15   4  -1   89.69   11.60
  15  -3   1  149.19   15.50
  15  -3   1  148.29   16.50
  15  -3   1  142.79   17.00
  15  -3   1  114.29   14.40
  15  -3   1  126.39   16.50
 -15   3  -1  119.29   15.20
 -15   3  -1  134.29   16.00
 -15   3  -1  152.98   16.20
 -15   3  -1  131.89   14.70
 -15   3  -1  138.69   19.20
  15  -2   1   59.69   10.60
  15  -2   1   55.69   11.80
  15  -2   1   63.09   10.90
  15  -2   1   69.99   12.20
  15  -2   1   66.09   11.40
 -15   2  -1   50.09    9.60
 -15   2  -1   49.70   10.40
 -15   2  -1   71.29   11.00
 -15   2  -1   68.19    9.60
 -15   2  -1   60.49   12.40
  15  -1   1 1062.19   41.10
  15  -1   1 1034.70   44.30
  15  -1   1 1180.98   44.70
  15  -1   1 1071.49   43.50
  15  -1   1 1129.49   43.00
  15  -1   1 1167.58   42.60
 -15   1  -1 1129.89   38.00
 -15   1  -1 1122.49   40.80
 -15   1  -1 1165.08   45.60
 -15   1  -1 1161.48   41.70
 -15   1  -1 1100.79   39.40
  15   0   1   -4.40    8.20
  15   0   1    2.70    7.20
  15   0   1   -0.80    6.40
  15   0   1    2.50    7.40
  15   0   1  -12.50    6.00
  15   0   1   -0.10    5.80
 -15   0  -1   -2.10    6.10
 -15   0  -1   -0.70    7.20
 -15   0  -1   11.00    8.70
 -15   0  -1    3.60    6.20
  15   1   1 1172.78   45.70
  15   1   1 1152.78   41.60
  15   1   1 1157.48   42.50
  15   1   1 1142.89   44.40
  15   1   1 1092.29   42.90
  15   1   1 1112.89   43.70
 -15  -1  -1 1099.79   34.40
 -15  -1  -1 1191.58   44.60
 -15  -1  -1 1122.19   34.90
 -15  -1  -1 1147.49   39.70
  15   2   1   58.99   12.00
  15   2   1   72.79   12.50
  15   2   1   66.89   10.30
  15   2   1   35.80    9.10
  15   2   1   63.99   10.80
  15   2   1   87.69   12.70
 -15  -2  -1   68.69    8.70
 -15  -2  -1   57.39   11.60
  15   3   1  111.09   14.50
  15   3   1  130.19   15.30
  15   3   1  136.79   17.00
 -15  -3  -1  144.19   16.90
  15   4   1  110.59   15.00
  15   4   1  113.49   14.60
  15   4   1  116.29   16.60
 -15  -4  -1  117.29   16.90
  15   5   1  441.86   24.90
  15   5   1  438.16   26.10
 -15  -5  -1  410.76   25.40
  15   6   1  135.29   16.80
  15   6   1  140.69   16.80
 -15  -6  -1  163.68   18.90
  15   7   1   73.69   12.30
  15   7   1   47.70   11.80
 -15  -7  -1   55.89   12.40
  15   8   1   38.80   10.90
  15   8   1   21.50    9.70
 -15  -8  -1    8.40    9.50
 -15  -8  -1   16.40   10.80
  15   9   1  133.69   19.70
 -15  -9  -1  157.98   19.80
 -15  -9  -1  127.59   18.20
  16  -8   1    6.70   11.10
  16  -7   1   59.29   13.30
  16  -7   1   73.99   10.00
  16  -6   1    6.70    9.90
  16  -6   1   16.20    8.20
 -16   6  -1   11.60   12.40
  16  -5   1  141.49   16.40
  16  -5   1  141.69   20.00
 -16   5  -1  165.88   21.10
  16  -4   1  210.68   26.90
  16  -4   1  182.88   17.40
  16  -4   1  191.98   20.80
 -16   4  -1  254.87   20.60
 -16   4  -1  195.08   17.90
  16  -3   1  -10.80    7.40
  16  -3   1   -0.30    9.80
  16  -3   1  -13.40    6.90
 -16   3  -1   -0.40   10.20
 -16   3  -1   -5.80    7.60
 -16   3  -1   -9.40    8.70
  16  -2   1   27.60   10.70
  16  -2   1   44.80   11.40
  16  -2   1   50.89   12.30
  16  -2   1   23.10    9.10
  16  -2   1   42.50   10.00
 -16   2  -1   30.60    9.50
 -16   2  -1   25.20   11.60
 -16   2  -1   33.10    8.60
 -16   2  -1   30.40    9.70
 -16   2  -1   32.70    9.10
  16  -1   1   34.30    9.20
  16  -1   1   33.20    9.00
  16  -1   1   32.20    8.80
  16  -1   1   39.90   10.90
  16  -1   1   32.90   11.50
  16  -1   1   37.40   10.40
 -16   1  -1   26.00    7.60
 -16   1  -1   28.80    9.40
 -16   1  -1   15.90   11.10
 -16   1  -1   29.20    8.50
  16   0   1   -0.30    7.80
  16   0   1   -1.40    8.40
  16   0   1   -0.60    6.50
  16   0   1    3.50    6.10
  16   0   1   -4.50    7.00
  16   0   1   -4.10    6.40
 -16   0  -1   -2.30    5.90
 -16   0  -1   -4.30    6.90
 -16   0  -1    0.00    5.90
 -16   0  -1   -7.70    8.60
  16   1   1    8.30    6.90
  16   1   1   25.00    8.90
  16   1   1   45.60   12.20
  16   1   1   36.20   10.10
  16   1   1   58.79   11.90
 -16  -1  -1   22.50    5.00
 -16  -1  -1   24.20    5.00
 -16  -1  -1   21.60    7.10
 -16  -1  -1   12.90    9.80
  16   2   1   31.10   11.40
  16   2   1   33.10    8.40
  16   2   1   40.90   10.10
 -16  -2  -1   37.80   10.50
 -16  -2  -1   38.90    7.80
  16   3   1    5.40    7.50
  16   3   1   -4.60    6.80
  16   3   1    1.00    8.10
 -16  -3  -1    5.90    9.00
  16   4   1  242.88   21.00
  16   4   1  212.88   19.10
 -16  -4  -1  209.68   20.20
  16   5   1  163.78   17.80
  16   5   1  154.28   18.40
 -16  -5  -1  122.79   18.60
  16   6   1   -9.20    6.70
  16   6   1   -8.30    9.10
 -16  -6  -1   13.10   10.30
  16   7   1   70.99   13.40
  16   7   1   72.09   13.70
 -16  -7  -1   70.59   14.00
  16   8   1   -0.60    9.40
  16   8   1   -2.30    9.10
 -16  -8  -1   28.50   11.00
 -16  -8  -1   14.30   11.10
  17  -8   1    8.40   11.50
  17  -7   1   52.99    9.60
  17  -7   1   41.60   13.30
  17  -6   1   38.00   12.70
  17  -6   1   38.10    9.80
 -17   6  -1   45.30   14.30
  17  -5   1  116.99   13.80
  17  -5   1   92.99   15.60
 -17   5  -1   72.89   14.80
  17  -4   1   60.09   14.50
  17  -4   1   64.39   15.90
 -17   4  -1   57.69   12.90
  17  -3   1    4.40    9.80
 -17   3  -1  -12.90   10.60
 -17   3  -1   17.60   10.60
 -17   3  -1   11.10    8.50
  17  -2   1  221.88   20.80
  17  -2   1  243.08   20.00
 -17   2  -1  293.37   24.50
 -17   2  -1  281.67   17.90
 -17   2  -1  248.48   19.60
  17  -1   1   21.70   11.50
  17  -1   1   32.70    9.20
 -17   1  -1   28.20    9.40
 -17   1  -1   26.10    8.20
 -17   1  -1   39.70   12.30
  17   0   1   17.70    8.70
  17   0   1   29.20   11.50
 -17   0  -1   20.40    9.30
 -17   0  -1   37.90   12.90
 -17   0  -1   41.70    8.40
 -17   0  -1   28.10    7.00
  17   1   1   27.70    9.20
  17   1   1   28.40   11.10
 -17  -1  -1   35.10    8.60
 -17  -1  -1   18.50   10.40
  17   2   1  253.57   22.70
  17   2   1  274.87   20.70
 -17  -2  -1  257.97   22.40
  17   3   1    1.70    9.20
  17   3   1    7.30    7.70
 -17  -3  -1    6.20   10.20
  17   4   1   63.89   12.30
  17   4   1   66.09   13.70
 -17  -4  -1   47.50   11.80
  17   5   1  114.69   15.30
  17   5   1  136.69   19.10
 -17  -5  -1  128.69   19.10
  17   6   1   18.10   11.20
  17   6   1   63.19   12.10
 -17  -6  -1   62.79   13.20
  17   7   1   64.29   13.20
  17   7   1   60.49   13.50
 -17  -7  -1   48.20   13.40
  17   8   1   20.30   12.00
 -17  -8  -1   23.70   11.20
 -17  -8  -1   10.90   11.00
  18  -7   1   34.30   14.40
  18  -7   1   21.10    9.20
  18  -6   1    5.60    9.00
  18  -6   1   -0.20   11.40
 -18   6  -1   10.30   12.70
  18  -5   1  123.39   18.40
 -18   5  -1   66.19   14.70
  18  -4   1   43.80   13.80
 -18   4  -1   13.40   11.40
  18  -3   1   20.20   12.20
 -18   3  -1   15.20    9.50
 -18   3  -1   10.20   10.40
  18  -2   1   12.20   10.80
 -18   2  -1   25.50   11.90
 -18   2  -1   12.80    8.60
 -18   2  -1    4.40   10.20
  18  -1   1    6.20   10.90
 -18   1  -1   24.10    9.70
 -18   1  -1   16.00   12.70
 -18   1  -1   22.10    8.30
  18   0   1  -12.40    9.30
  18   0   1   -3.10    7.80
 -18   0  -1   -4.00   10.00
 -18   0  -1   -5.90    6.10
 -18   0  -1    1.80    6.60
  18   1   1   12.80    8.70
  18   1   1   16.80   12.10
 -18  -1  -1   -3.80    8.90
  18   2   1   -5.10   10.50
  18   2   1   -5.30    7.90
 -18  -2  -1   14.70   10.90
  18   3   1    3.00    8.40
  18   3   1    2.20   10.80
 -18  -3  -1   11.70   10.90
  18   4   1   16.30    9.40
  18   4   1   16.90   12.00
 -18  -4  -1   -8.00   10.00
  18   5   1  121.89   18.30
  18   5   1  132.99   19.60
 -18  -5  -1  143.99   20.60
  18   6   1   -4.70    7.60
  18   6   1    3.80   10.60
 -18  -6  -1   12.90   11.40
  18   7   1   25.90   12.30
 -18  -7  -1   21.80   12.20
  19  -6   1   38.90   14.90
  19  -6   1   62.39   12.00
 -19   6  -1   52.39   15.50
  19  -5   1  102.59   18.30
 -19   5  -1  130.99   17.70
  19  -4   1   28.10   13.20
 -19   4  -1   28.30   12.90
  19  -3   1  556.54   34.20
 -19   3  -1  607.94   27.80
 -19   3  -1  556.24   29.40
  19  -2   1   24.80   12.30
 -19   2  -1   18.20   11.10
 -19   2  -1   45.50   10.00
  19  -1   1   65.89   15.50
 -19   1  -1   49.90   15.40
 -19   1  -1   81.69   11.60
 -19   1  -1   56.39    9.80
  19   0   1   18.70   12.00
 -19   0  -1  -22.60   10.70
 -19   0  -1    5.70    6.40
 -19   0  -1   13.10    6.90
  19   1   1   54.59   14.00
 -19  -1  -1   55.29   14.10
  19   2   1   26.20   11.20
  19   2   1   34.40   13.10
 -19  -2  -1    9.50   10.90
  19   3   1  592.34   34.50
  19   3   1  563.74   33.50
 -19  -3  -1  616.74   34.10
  19   4   1   21.50   12.60
  19   4   1   20.00   15.50
 -19  -4  -1   14.10   12.00
  19   5   1  113.59   17.70
 -19  -5  -1  145.89   19.40
  19   6   1   44.50   14.10
 -19  -6  -1   60.29   14.90
  20  -5   1   90.69   18.70
 -20   5  -1   96.99   17.50
  20  -4   1  -11.10   11.80
 -20   4  -1   -1.00   11.70
  20  -3   1   26.50   13.50
 -20   3  -1   10.90    9.40
 -20   3  -1   18.90   12.20
  20  -2   1   11.70   11.80
 -20   2  -1    9.30    9.10
 -20   2  -1   -4.60   10.20
  20  -1   1   49.99   14.70
 -20   1  -1   29.10    9.80
 -20   1  -1   50.09    9.70
  20   0   1    5.30   11.90
 -20   0  -1    8.10    5.60
 -20   0  -1    0.90   12.40
 -20   0  -1    2.40    5.50
  20   1   1   60.99   16.30
 -20  -1  -1   69.49   15.60
  20   2   1    1.20   11.20
 -20  -2  -1    6.50   11.50
  20   3   1   20.70   13.50
 -20  -3  -1   16.10   12.60
  20   4   1   10.00   12.00
 -20  -4  -1   12.20   12.40
  20   5   1   65.39   16.50
 -20  -5  -1   92.69   16.80
  21  -4   1   -1.40   13.30
 -21   4  -1    1.30   12.40
  21  -3   1  -13.20   11.70
 -21   3  -1    3.70   11.80
 -21   3  -1  -16.00    9.70
  21  -2   1   20.30   13.40
 -21   2  -1   36.30   10.40
 -21   2  -1   12.80   11.10
  21  -1   1   30.10   14.50
 -21   1  -1   21.80    8.80
 -21   1  -1   34.10    8.80
  21   0   1   15.10   13.30
  21   1   1   22.30   13.30
 -21  -1  -1   58.79   21.30
  21   2   1   25.50   14.20
 -21  -2  -1   30.90   15.60
  21   3   1   16.60   13.20
 -21  -3  -1   -5.70   12.20
  21   4   1   -3.10   12.10
 -21  -4  -1   17.80   13.00
  22  -3   1   76.59   18.90
 -22   3  -1   89.49   15.20
 -22   3  -1   39.00   12.00
  22  -2   1    6.50   13.20
 -22   2  -1   11.80   10.00
 -22   2  -1    8.40   10.60
  22  -1   1   17.70   15.60
 -22   1  -1   34.80    8.40
 -22   1  -1   26.10    7.90
  22   0   1  -12.10   12.70
  22   1   1   35.30   15.70
  22   2   1   -8.30   12.70
  22   3   1   52.49   16.40
 -22  -3  -1   64.79   17.80
  23   2  -2    0.30   13.10
  23   1  -2    7.00   14.00
 -23   0   2    2.80    8.60
 -23   0   2  -12.70    8.00
  23   0  -2   -1.10   13.30
 -23   1   2    7.70   11.00
 -23   1   2    1.10    9.40
  23  -1  -2    5.70   14.40
 -23   2   2   16.00   12.90
 -23   2   2    8.30   14.30
  23  -2  -2   22.60   15.30
  22   4  -2   15.60   14.40
  22   3  -2   -7.20   12.60
  22   2  -2  143.99   21.70
 -22  -1   2   22.40    6.70
 -22  -1   2   32.50    6.60
  22   1  -2   38.00   14.30
 -22   0   2   71.39   11.10
 -22   0   2  100.99   14.40
  22   0  -2   94.39   18.80
 -22   1   2   50.29   12.80
 -22   1   2   52.09   11.20
  22  -1  -2   40.20   15.30
 -22   2   2  202.38   22.70
  22  -2  -2  174.98   23.50
 -22   3   2   -3.20   12.80
  22  -3  -2   -7.40   13.30
 -22   4   2    0.70   13.90
  22  -4  -2   25.40   15.20
 -21  -5   2   44.80   15.10
  21   5  -2   47.70   15.70
 -21  -4   2   -6.10   12.00
  21   4  -2   -4.20   12.20
 -21  -3   2  -23.40   11.10
  21   3  -2   -3.70   12.00
  21   2  -2  245.18   26.20
 -21  -1   2    9.40    6.80
 -21  -1   2   -1.10    7.40
  21   1  -2    6.00   11.40
 -21   0   2   -8.40    9.00
 -21   0   2   -9.00    7.60
  21   0  -2   -3.30   12.00
 -21   1   2   12.20    9.10
 -21   1   2  -14.50    9.80
  21  -1  -2    1.20   11.60
 -21   2   2  227.18   22.90
 -21   2   2  212.48   22.70
  21  -2  -2  216.38   25.20
 -21   3   2   14.40   11.90
  21  -3  -2   -5.50   11.20
 -21   4   2    9.30   13.40
  21  -4  -2   10.40   12.40
  21  -5  -2   38.50   10.80
  21  -5  -2   43.40   14.90
 -20  -6   2   22.70   13.60
  20   6  -2   12.50   12.80
 -20  -5   2   53.99   14.70
  20   5  -2   62.49   15.60
 -20  -4   2   13.90   11.80
  20   4  -2    5.60   12.40
 -20  -3   2  659.53   35.80
  20   3  -2  577.24   35.10
 -20  -2   2   55.99   15.00
  20   2  -2  105.79   17.70
 -20  -1   2  182.68   14.30
 -20  -1   2  166.28   15.10
 -20  -1   2  193.48   23.40
  20   1  -2  151.18   22.20
 -20   0   2   33.00    9.30
 -20   0   2   21.30   10.50
  20   0  -2   39.30   15.00
 -20   1   2  204.18   17.90
 -20   1   2  207.68   20.70
  20  -1  -2  190.28   23.20
 -20   2   2   86.29   12.20
 -20   2   2   79.99   14.30
  20  -2  -2   75.89   16.00
 -20   3   2  593.64   31.80
  20  -3  -2  647.84   36.90
 -20   4   2    0.50   12.50
  20  -4  -2   19.30   13.70
  20  -4  -2    4.30   12.50
  20  -5  -2   67.79   16.60
  20  -5  -2   88.49   12.30
  20  -6  -2   29.70   14.10
  20  -6  -2   31.40    9.00
 -19  -7   2   32.10   14.10
  19   7  -2   23.80   12.80
 -19  -6   2   32.80   13.60
  19   6  -2   53.79   14.80
 -19  -5   2    2.00   11.60
  19   5  -2    2.00   11.10
 -19  -4   2   22.20   13.00
  19   4  -2    9.20   12.10
 -19  -3   2   -1.70   10.50
  19   3  -2   24.50   12.00
 -19  -2   2    5.80   10.80
 -19  -2   2    6.20    5.00
 -19  -2   2    8.40    5.10
  19   2  -2    2.00   10.80
 -19  -1   2   22.30   12.30
 -19  -1   2   -5.50    7.50
 -19  -1   2   -7.90    6.50
  19   1  -2  -17.40    9.30
 -19   0   2    2.60    9.30
 -19   0   2    5.60    7.80
 -19   0   2   -9.80   10.80
  19   0  -2    3.60   11.00
 -19   1   2    4.40   10.20
 -19   1   2   12.40    8.90
  19  -1  -2   -3.80   10.70
 -19   2   2    8.20    9.10
 -19   2   2   11.50   10.60
  19  -2  -2    6.00   11.90
 -19   3   2   -2.60   10.90
  19  -3  -2   17.50   12.50
 -19   4   2    4.60   11.50
  19  -4  -2    1.00   11.60
  19  -4  -2    8.70    8.90
 -19   5   2  -10.60   14.50
  19  -5  -2  -13.70   10.50
  19  -5  -2   -4.10    7.80
  19  -6  -2   46.10   14.20
  19  -6  -2   48.90    9.10
  19  -7  -2    4.90   11.90
 -18  -7   2   57.29   14.40
  18   7  -2   65.89   14.60
 -18  -6   2   -2.70   10.90
  18   6  -2   -3.60    9.70
 -18  -5   2    5.80   10.80
  18   5  -2    4.20    9.00
  18   5  -2   17.10   11.00
 -18  -4   2  132.79   20.30
  18   4  -2  163.28   20.60
  18   4  -2  139.49   18.10
 -18  -3   2    5.20   10.80
  18   3  -2  -10.30    6.90
  18   3  -2  -17.00    9.50
 -18  -2   2  451.95   17.80
 -18  -2   2  437.96   18.20
 -18  -2   2  479.95   28.90
  18   2  -2  450.35   28.80
  18   2  -2  452.25   26.20
 -18  -1   2   15.90    7.20
 -18  -1   2   54.89    9.50
 -18  -1   2   29.30   11.00
  18   1  -2   39.10   12.80
  18   1  -2   25.70    8.90
 -18   0   2  109.79   14.30
 -18   0   2  124.39   16.30
 -18   0   2  123.79   17.10
  18   0  -2  116.29   16.50
  18   0  -2  119.49   16.80
 -18   1   2   46.50    9.50
 -18   1   2   12.60   10.50
 -18   1   2   35.50   12.50
  18  -1  -2   35.90   13.30
  18  -1  -2   64.09   15.70
 -18   2   2  435.36   25.60
 -18   2   2  448.76   35.70
 -18   2   2  493.35   24.40
  18  -2  -2  450.35   29.00
  18  -2  -2  496.35   25.70
 -18   3   2   -1.30   10.50
  18  -3  -2    9.40   10.50
  18  -3  -2    5.60    8.70
 -18   4   2  129.79   17.10
  18  -4  -2  159.78   17.00
  18  -4  -2  170.08   20.20
 -18   5   2    9.00   12.70
  18  -5  -2    4.30    7.80
  18  -5  -2   -2.90   10.10
  18  -6  -2    2.40   10.70
  18  -6  -2   -7.70    6.80
  18  -7  -2   57.39   14.50
 -17  -8   2   27.80   13.40
 -17  -7   2   84.29   15.50
  17   7  -2  115.09   16.40
 -17  -6   2   14.50   11.40
  17   6  -2    4.60   10.30
  17   6  -2    5.10    8.30
 -17  -5   2  101.79   15.10
  17   5  -2  125.89   17.30
  17   5  -2  137.89   18.60
 -17  -4   2  243.38   22.00
  17   4  -2  214.58   20.70
  17   4  -2  198.48   19.20
 -17  -3   2   41.70   12.30
  17   3  -2   31.30    9.40
  17   3  -2   29.10   11.80
 -17  -2   2  139.29   10.80
 -17  -2   2  133.69   19.40
 -17  -2   2  138.49   11.70
 -17  -2   2  146.29   13.70
  17   2  -2  141.09   16.20
  17   2  -2  147.99   19.10
 -17  -1   2   20.80    7.10
 -17  -1   2    6.30    6.60
 -17  -1   2   11.30   10.40
 -17  -1   2   12.30    7.80
  17   1  -2    8.30    7.40
  17   1  -2   13.50    9.90
  17   1  -2   22.40   10.00
  17   1  -2   12.00    7.40
  17   1  -2    1.70   10.80
 -17   0   2    3.80    8.50
 -17   0   2    4.40   10.40
 -17   0   2    3.00    6.50
 -17   0   2   -8.40    6.60
  17   0  -2    1.10    6.80
  17   0  -2    3.70    7.90
  17   0  -2    6.70    7.10
  17   0  -2    9.40    9.70
  17   0  -2   -5.70    6.70
 -17   1   2   25.20    8.30
 -17   1   2   13.10    8.50
 -17   1   2   19.00    9.50
 -17   1   2   21.70    7.90
 -17   1   2   12.40   10.10
  17  -1  -2    6.70    7.90
  17  -1  -2   -0.10    9.90
  17  -1  -2   15.80    8.60
  17  -1  -2   20.00    9.00
  17  -1  -2    7.90    7.40
  17  -1  -2    4.70    7.90
 -17   2   2  161.58   16.60
 -17   2   2  173.18   20.80
 -17   2   2  166.98   17.40
 -17   2   2  137.09   20.30
 -17   2   2  151.98   15.30
  17  -2  -2  162.58   16.10
  17  -2  -2  152.18   17.70
  17  -2  -2  152.28   18.70
  17  -2  -2  141.99   19.30
 -17   3   2   26.10   10.70
 -17   3   2   52.49   10.50
  17  -3  -2   43.20   10.00
  17  -3  -2   45.60   11.90
  17  -3  -2   40.50   11.90
 -17   4   2  201.78   20.70
  17  -4  -2  191.98   20.70
  17  -4  -2  213.38   21.20
  17  -4  -2  249.97   17.90
 -17   5   2  120.79   16.30
  17  -5  -2   91.39   15.50
  17  -5  -2  118.19   16.50
  17  -5  -2  102.89   13.70
  17  -6  -2    0.20   10.00
  17  -6  -2    9.60    6.80
  17  -7  -2   87.29   15.70
  17  -8  -2   23.40   11.40
 -16  -8   2   14.40   11.60
 -16  -8   2   24.30   11.80
 -16  -7   2   76.69   14.50
  16   7  -2   72.79   13.00
  16   7  -2   79.19   14.10
 -16  -6   2   75.29   14.00
  16   6  -2   99.39   14.00
  16   6  -2  104.49   15.00
 -16  -5   2  504.75   28.40
  16   5  -2  454.05   26.10
  16   5  -2  455.45   27.20
 -16  -4   2  105.89   15.20
  16   4  -2   81.99   13.80
  16   4  -2   90.79   13.10
 -16  -3   2   97.89   14.50
 -16  -3   2  117.59   12.40
  16   3  -2  113.79   14.20
  16   3  -2   82.89   13.90
  16   3  -2  104.89   14.70
  16   3  -2  125.89   15.30
 -16  -2   2   -2.00    8.50
 -16  -2   2   22.80    5.90
 -16  -2   2    9.70    6.40
 -16  -2   2   13.20    6.60
  16   2  -2    9.30    7.70
  16   2  -2   17.90    8.50
  16   2  -2   13.00    7.60
  16   2  -2    5.90    7.30
  16   2  -2   26.70   10.60
 -16  -1   2 1012.20   34.10
 -16  -1   2 1031.70   41.50
 -16  -1   2  983.90   35.70
 -16  -1   2 1023.50   37.70
  16   1  -2  995.20   40.60
  16   1  -2 1015.60   39.30
  16   1  -2  996.40   41.20
  16   1  -2  949.01   39.40
  16   1  -2 1039.50   42.20
  16   1  -2  995.50   38.60
 -16   0   2  741.93   28.50
 -16   0   2  739.33   30.90
 -16   0   2  717.83   30.90
 -16   0   2  846.82   35.70
 -16   0   2  728.83   31.80
  16   0  -2  738.53   33.80
  16   0  -2  737.93   31.60
  16   0  -2  763.12   32.20
  16   0  -2  774.62   35.00
  16   0  -2  779.22   33.00
  16   0  -2  699.23   33.80
 -16   1   2  959.90   35.30
 -16   1   2  982.60   37.90
 -16   1   2 1077.39   39.30
 -16   1   2  951.30   41.10
 -16   1   2  988.70   37.60
  16  -1  -2 1009.00   41.50
  16  -1  -2 1010.50   41.10
  16  -1  -2  974.50   38.90
  16  -1  -2  926.51   40.30
  16  -1  -2  914.81   37.20
  16  -1  -2  991.80   38.70
 -16   2   2    2.90    7.60
 -16   2   2   29.40   10.10
 -16   2   2   15.90    7.80
 -16   2   2    5.90    9.60
 -16   2   2    3.70    9.70
  16  -2  -2   21.80    9.10
  16  -2  -2   15.10    7.90
  16  -2  -2    3.60    7.70
  16  -2  -2   18.60    8.10
  16  -2  -2   13.80    9.00
 -16   3   2   92.99   14.60
 -16   3   2   99.59   15.30
 -16   3   2  125.09   16.90
 -16   3   2   86.29   12.00
 -16   3   2  111.79   14.50
  16  -3  -2  134.89   14.80
  16  -3  -2  128.39   14.40
  16  -3  -2  125.79   17.40
  16  -3  -2  148.49   17.10
  16  -3  -2  110.59   14.00
 -16   4   2   95.49   13.80
 -16   4   2   78.59   11.60
  16  -4  -2  103.29   14.00
  16  -4  -2   61.49   12.20
  16  -4  -2  117.19   15.70
  16  -4  -2   77.29   12.90
 -16   5   2  497.65   28.00
  16  -5  -2  383.76   27.20
  16  -5  -2  496.55   27.80
  16  -5  -2  457.95   21.80
  16  -6  -2  115.49   17.00
  16  -6  -2  101.49   15.10
  16  -6  -2  108.19   11.50
  16  -7  -2  127.19   19.20
  16  -7  -2  108.29   15.40
  16  -8  -2   46.10   12.10
 -15  -9   2   21.30   11.80
 -15  -9   2    6.50   10.50
 -15  -8   2  207.78   21.00
 -15  -8   2  269.57   23.20
  15   8  -2  223.78   21.20
 -15  -7   2  247.28   22.40
  15   7  -2  265.97   21.20
  15   7  -2  269.37   20.50
 -15  -6   2   40.20   11.30
  15   6  -2   39.90   10.90
  15   6  -2   37.70   10.10
 -15  -5   2   97.49   13.70
  15   5  -2   71.69   11.40
  15   5  -2  106.09   14.30
 -15  -4   2    3.20    9.10
 -15  -4   2   -4.10    5.20
  15   4  -2    3.00    6.60
  15   4  -2    3.40    8.80
  15   4  -2   10.50    8.10
  15   4  -2   -3.70    6.70
 -15  -3   2  198.78   14.50
 -15  -3   2  225.18   19.80
  15   3  -2  179.58   16.50
  15   3  -2  175.38   16.50
  15   3  -2  161.98   16.00
  15   3  -2  208.78   17.40
  15   3  -2  205.78   18.80
 -15  -2   2  222.68   14.10
 -15  -2   2  228.58   19.50
 -15  -2   2  194.08   12.70
 -15  -2   2  231.18   15.50
  15   2  -2  191.08   16.30
  15   2  -2  197.38   17.30
  15   2  -2  239.58   19.80
  15   2  -2  212.88   16.90
  15   2  -2  215.58   17.40
 -15  -1   2   -0.20    8.30
 -15  -1   2    1.10    6.30
 -15  -1   2   -5.20    7.70
 -15  -1   2   -1.80    6.10
 -15  -1   2    8.30    7.30
  15   1  -2   -3.90    5.30
  15   1  -2    7.70    7.20
  15   1  -2   -6.70    8.60
  15   1  -2    4.80    7.40
  15   1  -2    2.40    6.80
  15   1  -2    3.10    7.00
 -15   0   2    0.60    8.60
 -15   0   2   12.70    7.90
 -15   0   2   -9.80    8.40
 -15   0   2    4.10    6.80
 -15   0   2   -4.80    6.20
  15   0  -2   -3.70    6.10
  15   0  -2    9.50    6.70
  15   0  -2   -6.90    6.80
  15   0  -2    2.80    7.40
  15   0  -2    3.80    7.10
  15   0  -2   -1.30    8.80
 -15   1   2   -0.60    8.40
 -15   1   2    3.80    6.90
 -15   1   2   -0.70    7.10
 -15   1   2    9.40    8.80
 -15   1   2   -2.10    6.70
  15  -1  -2   -5.00    5.60
  15  -1  -2    7.30    8.00
  15  -1  -2    6.60    6.40
  15  -1  -2   -6.50    8.50
  15  -1  -2    0.50    9.10
  15  -1  -2   16.50    8.40
 -15   2   2  258.47   18.70
 -15   2   2  237.88   16.60
 -15   2   2  202.98   18.00
 -15   2   2  220.08   21.00
  15  -2  -2  202.18   17.90
  15  -2  -2  210.88   18.20
  15  -2  -2  206.58   16.70
  15  -2  -2  205.48   18.20
  15  -2  -2  204.88   16.90
 -15   3   2  189.38   20.30
 -15   3   2  214.28   18.00
 -15   3   2  201.18   18.00
 -15   3   2  182.48   16.70
 -15   3   2  209.48   16.50
  15  -3  -2  223.98   18.90
  15  -3  -2  198.68   16.30
  15  -3  -2  215.78   19.30
  15  -3  -2  229.38   16.80
  15  -3  -2  197.28   16.20
 -15   4   2   12.00    9.40
 -15   4   2   -1.70   10.20
 -15   4   2    8.70    7.30
 -15   4   2   -6.10    7.00
  15  -4  -2    4.30    8.30
  15  -4  -2    8.60    8.20
  15  -4  -2    4.20    6.80
  15  -4  -2   -4.10    5.90
  15  -4  -2    4.90    5.90
  15  -4  -2   -4.30    8.20
 -15   5   2  101.99   14.50
 -15   5   2  120.79   16.10
  15  -5  -2   96.79    9.80
  15  -5  -2   97.29   12.70
  15  -5  -2  100.09   15.20
  15  -5  -2   97.89   13.80
  15  -5  -2  126.59   17.40
 -15   6   2   43.90   14.70
  15  -6  -2   27.40   10.30
  15  -6  -2   28.80    6.80
  15  -6  -2   32.90   10.40
  15  -7  -2  252.47   20.60
  15  -7  -2  248.88   22.90
  15  -8  -2  212.98   22.80
  15  -8  -2  212.48   19.30
  15  -9  -2   13.90   13.80
 -14  -9   2    7.70    9.50
 -14  -9   2   26.30   11.50
  14   9  -2   22.90   10.50
 -14  -8   2   13.60    8.90
 -14  -8   2   13.30   11.00
  14   8  -2   16.90    9.40
 -14  -7   2    3.40    9.80
  14   7  -2   23.20    9.70
  14   7  -2    5.90    8.00
 -14  -6   2    4.90    9.10
  14   6  -2   -5.50    7.80
  14   6  -2   -0.30    6.80
 -14  -5   2  464.55   26.00
  14   5  -2  516.15   25.90
  14   5  -2  428.66   23.80
  14   5  -2  446.56   23.40
 -14  -4   2  235.88   19.60
 -14  -4   2  222.38   14.20
  14   4  -2  166.28   16.00
  14   4  -2  210.58   17.30
  14   4  -2  179.08   17.50
  14   4  -2  187.68   15.50
 -14  -3   2    0.00    4.10
 -14  -3   2   -1.20    8.80
 -14  -3   2   -2.70    3.50
 -14  -3   2   -3.60    5.50
  14   3  -2    8.10    8.60
  14   3  -2    2.00    7.00
  14   3  -2    3.00    7.00
  14   3  -2    5.20    7.20
  14   3  -2   -1.70    6.20
 -14  -2   2   61.49    9.40
 -14  -2   2   54.39    8.00
 -14  -2   2   50.89   11.10
 -14  -2   2   69.99    9.40
 -14  -2   2   66.09    8.90
  14   2  -2   71.09   12.40
  14   2  -2   58.79    9.50
  14   2  -2   41.50    8.50
  14   2  -2   55.29   10.00
  14   2  -2   60.69    9.50
 -14  -1   2   51.39    7.70
 -14  -1   2   55.39    9.40
 -14  -1   2   63.19    9.40
 -14  -1   2   49.40   10.20
 -14  -1   2   75.39   10.00
  14   1  -2   47.90    9.50
  14   1  -2   83.49   11.90
  14   1  -2   62.79   10.20
  14   1  -2   67.59   10.90
  14   1  -2   80.89   11.60
  14   1  -2   69.49    9.90
 -14   0   2   35.80    7.50
 -14   0   2   32.60    8.70
 -14   0   2   22.70    7.00
 -14   0   2   19.80    8.50
 -14   0   2   24.20    9.00
  14   0  -2   31.90    9.20
  14   0  -2   39.10    8.50
  14   0  -2   40.80    8.70
  14   0  -2   25.60    8.30
  14   0  -2   29.20    9.30
  14   0  -2   22.00    6.80
 -14   1   2   58.69    9.80
 -14   1   2   68.79   10.30
 -14   1   2   51.99   10.10
 -14   1   2   63.99    8.90
 -14   1   2   49.60    9.00
  14  -1  -2   65.69    9.40
  14  -1  -2   75.09   11.00
  14  -1  -2   66.19   11.50
  14  -1  -2   53.29    8.70
  14  -1  -2   65.09   10.50
 -14   2   2   56.19   10.80
 -14   2   2   58.79   10.20
 -14   2   2   44.10    8.50
 -14   2   2   57.59   10.10
  14  -2  -2   61.09   11.20
  14  -2  -2   64.69    9.40
  14  -2  -2   60.69   10.90
  14  -2  -2   61.49   10.60
  14  -2  -2   40.30    8.40
 -14   3   2   -2.60    6.50
 -14   3   2   14.70    9.40
 -14   3   2    3.60    8.60
 -14   3   2   15.00    8.00
  14  -3  -2   11.90    9.00
  14  -3  -2   10.20    6.20
  14  -3  -2   12.20    8.30
  14  -3  -2   12.90    7.30
  14  -3  -2    2.10    6.10
 -14   4   2  200.68   17.60
 -14   4   2  191.28   18.50
 -14   4   2  206.68   19.20
 -14   4   2  219.98   20.60
 -14   4   2  205.88   17.10
 -14   4   2  199.18   16.00
  14  -4  -2  210.68   15.60
  14  -4  -2  224.48   18.90
  14  -4  -2  215.08   15.30
  14  -4  -2  198.78   15.90
  14  -4  -2  208.38   18.40
  14  -4  -2  164.98   17.50
 -14   5   2  434.76   24.40
 -14   5   2  478.35   27.70
 -14   5   2  499.15   30.60
 -14   5   2  474.45   25.70
 -14   5   2  492.05   29.40
  14  -5  -2  462.75   26.80
  14  -5  -2  463.65   20.60
  14  -5  -2  463.95   23.80
  14  -5  -2  443.36   18.60
  14  -5  -2  493.85   25.80
  14  -5  -2  496.35   27.10
 -14   6   2    2.80    8.00
  14  -6  -2   -0.40    7.50
  14  -6  -2  -10.00    7.50
  14  -6  -2   -1.30    7.80
  14  -6  -2    0.10    5.10
 -14   7   2   -1.00   12.30
  14  -7  -2    5.90    8.40
  14  -7  -2   -6.20    7.80
  14  -8  -2   19.80   10.70
  14  -8  -2    7.70    9.20
  14  -9  -2   12.80   11.60
  14  -9  -2   39.20   11.50
 -13 -10   2    7.00   11.30
 -13 -10   2   -0.10    9.60
 -13  -9   2   39.50   11.60
 -13  -9   2   38.30   12.40
  13   9  -2   47.20   11.00
 -13  -8   2  385.06   25.50
 -13  -8   2  396.16   24.40
  13   8  -2  372.46   23.80
 -13  -7   2   28.20    9.90
 -13  -7   2   11.40    9.60
  13   7  -2   32.00    9.60
 -13  -6   2  117.39   16.20
  13   6  -2  110.79   13.50
  13   6  -2  114.39   14.60
  13   6  -2  138.59   15.70
 -13  -5   2   14.80    9.10
  13   5  -2    4.00    6.70
  13   5  -2   -0.90    7.50
  13   5  -2    4.90    6.10
  13   5  -2   18.20    7.70
 -13  -4   2   52.69    8.00
 -13  -4   2   56.19   11.30
  13   4  -2   78.19   11.10
  13   4  -2   68.49   11.30
  13   4  -2   53.79    9.90
  13   4  -2   56.29    9.00
 -13  -3   2  200.68    9.90
 -13  -3   2  228.88   10.80
 -13  -3   2  202.48   18.20
 -13  -3   2  230.08   14.60
  13   3  -2  204.18   15.70
  13   3  -2  224.58   15.90
  13   3  -2  206.08   16.10
  13   3  -2  222.08   16.40
  13   3  -2  211.48   17.40
 -13  -2   2   22.00    8.50
 -13  -2   2   45.90    7.90
 -13  -2   2   42.50    7.50
 -13  -2   2   28.10    5.80
 -13  -2   2   27.60    6.50
  13   2  -2   48.70    8.80
  13   2  -2   46.60    9.10
  13   2  -2   44.80    9.70
  13   2  -2   35.20    8.10
  13   2  -2   58.49    9.40
 -13  -1   2    3.90    7.10
 -13  -1   2    8.60    5.70
 -13  -1   2   10.10    7.50
 -13  -1   2   13.80    6.70
 -13  -1   2    7.40    5.50
  13   1  -2    1.90    6.80
  13   1  -2    2.90    5.60
  13   1  -2    1.30    6.30
  13   1  -2    5.90    6.60
  13   1  -2   -0.90    5.50
 -13   0   2    6.90    7.20
 -13   0   2  -15.10    5.30
 -13   0   2   -1.20    6.20
 -13   0   2   -2.10    5.50
 -13   0   2   -9.40    5.70
  13   0  -2    2.50    5.50
  13   0  -2    8.20    6.80
  13   0  -2    3.70    6.20
  13   0  -2    3.60    7.20
  13   0  -2  -12.30    6.00
  13   0  -2    2.10    5.70
 -13   1   2    4.30    6.00
 -13   1   2    6.40    7.50
 -13   1   2    6.10    6.60
 -13   1   2   -3.40    6.60
 -13   1   2    2.40    8.10
  13  -1  -2    4.00    6.80
  13  -1  -2    3.10    5.10
  13  -1  -2    1.00    6.70
  13  -1  -2    0.60    6.40
  13  -1  -2    3.40    4.90
 -13   2   2   49.80   10.80
 -13   2   2   27.00    8.20
 -13   2   2   11.30    9.60
 -13   2   2   44.10    9.30
 -13   2   2   37.80    8.60
  13  -2  -2   19.50    5.90
  13  -2  -2   59.39   10.40
  13  -2  -2   36.80    8.90
  13  -2  -2   28.80    7.50
  13  -2  -2   32.80    7.80
 -13   3   2  208.88   16.80
 -13   3   2  203.78   16.20
 -13   3   2  210.88   18.70
 -13   3   2  219.78   16.80
  13  -3  -2  171.08   18.50
  13  -3  -2  222.98   15.40
  13  -3  -2  200.18   17.10
  13  -3  -2  200.08   15.30
  13  -3  -2  198.78   14.70
  13  -3  -2  221.78   17.40
 -13   4   2   50.29   10.00
 -13   4   2   45.80    9.60
 -13   4   2   72.39   11.50
 -13   4   2   54.59   11.90
 -13   4   2   46.50   10.70
 -13   4   2   45.50    9.00
  13  -4  -2   69.69    9.90
  13  -4  -2   54.89   11.40
  13  -4  -2   48.20   11.00
  13  -4  -2   43.30    9.70
  13  -4  -2   67.59    8.80
  13  -4  -2   83.59   11.00
  13  -4  -2   55.79    8.60
 -13   5   2   10.50    8.80
 -13   5   2   26.80    8.90
 -13   5   2   -0.70    9.10
 -13   5   2   19.10   10.20
 -13   5   2    5.60    7.10
 -13   5   2   14.70    7.20
  13  -5  -2    7.50    7.90
  13  -5  -2   27.30    9.30
  13  -5  -2    3.20    7.60
  13  -5  -2   12.10    5.30
  13  -5  -2   16.40    6.50
  13  -5  -2   14.50    6.80
 -13   6   2  122.69   15.50
 -13   6   2  101.69   16.50
  13  -6  -2   89.09   12.90
  13  -6  -2  104.49   14.20
  13  -6  -2  119.39   13.00
  13  -6  -2  103.39    9.20
  13  -6  -2   86.79   13.30
  13  -6  -2  120.09    8.60
 -13   7   2   33.40   10.40
  13  -7  -2   24.40    9.60
  13  -7  -2   31.50   10.90
  13  -7  -2   35.70    9.70
  13  -8  -2  401.86   22.40
  13  -8  -2  400.16   26.20
  13  -9  -2   54.99   12.30
  13  -9  -2   38.30   12.80
  13 -10  -2   -3.50   10.10
 -12 -10   2   30.60   12.30
 -12 -10   2   35.40   11.80
  12  10  -2   25.20   12.10
 -12  -9   2  123.49   17.50
 -12  -9   2   59.79   12.30
  12   9  -2   48.80   11.80
 -12  -8   2  112.49   14.60
 -12  -8   2  142.19   16.50
  12   8  -2  130.29   16.20
 -12  -7   2    4.40    8.80
 -12  -7   2   27.80    8.90
  12   7  -2   23.40    8.50
  12   7  -2    6.80    6.40
 -12  -6   2  585.34   28.40
  12   6  -2  567.54   26.10
  12   6  -2  538.25   26.70
  12   6  -2  625.04   27.50
 -12  -5   2  184.98   12.70
 -12  -5   2  164.78   17.10
  12   5  -2  165.38   14.30
  12   5  -2  177.28   15.80
  12   5  -2  169.98   15.50
  12   5  -2  192.28   15.60
 -12  -4   2  494.35   24.50
 -12  -4   2  482.45   20.70
  12   4  -2  463.25   21.90
  12   4  -2  452.75   22.80
  12   4  -2  459.45   22.80
  12   4  -2  477.25   23.60
  12   4  -2  413.26   27.10
 -12  -3   2   38.30    7.20
 -12  -3   2   31.90    6.60
 -12  -3   2   31.40    5.30
 -12  -3   2   25.30    4.20
 -12  -3   2   10.60    7.70
  12   3  -2   35.40    8.10
  12   3  -2   36.20    7.60
  12   3  -2   34.80    7.60
  12   3  -2   20.10    8.30
  12   3  -2   36.30    7.90
 -12  -2   2  740.53   26.70
 -12  -2   2  742.23   28.50
 -12  -2   2  753.02   28.30
 -12  -2   2  767.12   31.00
 -12  -2   2  748.83   25.20
  12   2  -2  793.32   29.90
  12   2  -2  803.92   29.70
  12   2  -2  744.23   31.00
  12   2  -2  726.73   29.80
  12   2  -2  768.42   30.30
 -12  -1   2  209.08   12.50
 -12  -1   2  234.88   14.60
 -12  -1   2  207.58   15.90
 -12  -1   2  222.98   14.50
 -12  -1   2  211.58   14.70
  12   1  -2  229.38   14.70
  12   1  -2  205.48   14.60
  12   1  -2  229.88   15.00
  12   1  -2  223.98   16.50
  12   1  -2  223.58   15.30
 -12   0   2 2193.58   70.09
 -12   0   2 2230.78   68.59
 -12   0   2 2293.77   67.89
 -12   0   2 2209.78   68.49
 -12   0   2 2225.08   65.89
  12   0  -2 2322.07   70.59
  12   0  -2 2341.27   71.59
  12   0  -2 2229.98   69.19
  12   0  -2 2104.69   67.79
  12   0  -2 2136.89   70.09
  12   0  -2 2303.67   69.39
 -12   1   2  197.08   15.00
 -12   1   2  217.88   15.30
 -12   1   2  242.38   16.80
 -12   1   2  210.28   13.50
  12  -1  -2  245.78   15.10
  12  -1  -2  234.28   16.50
  12  -1  -2  224.88   14.40
  12  -1  -2  236.48   16.10
  12  -1  -2  231.78   16.50
 -12   2   2  751.42   29.80
 -12   2   2  759.42   31.70
 -12   2   2  726.93   29.60
 -12   2   2  731.13   28.70
  12  -2  -2  750.52   29.40
  12  -2  -2  755.32   30.80
  12  -2  -2  782.62   28.40
  12  -2  -2  734.83   31.10
  12  -2  -2  764.42   29.50
 -12   3   2   21.20    7.60
 -12   3   2   26.80    8.50
 -12   3   2   38.70    7.50
 -12   3   2   37.40    9.60
 -12   3   2   35.30    8.10
 -12   3   2   26.80    8.50
  12  -3  -2   21.30    6.30
  12  -3  -2   25.30    8.10
  12  -3  -2   54.19   10.20
  12  -3  -2   25.50    7.00
  12  -3  -2   39.30    8.20
  12  -3  -2   23.60    7.80
 -12   4   2  447.66   23.50
 -12   4   2  456.75   23.00
 -12   4   2  459.35   25.70
 -12   4   2  507.65   21.60
 -12   4   2  472.85   26.00
 -12   4   2  427.76   22.50
  12  -4  -2  467.75   20.30
  12  -4  -2  437.36   21.90
  12  -4  -2  492.15   19.50
  12  -4  -2  441.96   24.30
  12  -4  -2  451.05   22.80
  12  -4  -2  492.15   21.90
  12  -4  -2  448.96   24.50
 -12   5   2  159.68   18.30
 -12   5   2  180.88   18.80
 -12   5   2  176.18   16.60
 -12   5   2  175.58   15.80
 -12   5   2  151.38   14.80
 -12   5   2  175.58   17.30
  12  -5  -2  170.78   14.20
  12  -5  -2  176.68   16.80
  12  -5  -2  159.98   11.00
  12  -5  -2  165.78   16.70
  12  -5  -2  196.58   16.10
  12  -5  -2  150.88   12.00
 -12   6   2  606.44   29.20
 -12   6   2  539.75   27.50
 -12   6   2  566.34   29.70
 -12   6   2  568.74   31.20
 -12   6   2  632.04   28.60
  12  -6  -2  559.64   19.70
  12  -6  -2  590.54   26.00
  12  -6  -2  604.34   29.10
  12  -6  -2  635.54   30.20
  12  -6  -2  589.84   26.30
  12  -6  -2  637.14   21.30
 -12   7   2    8.50    8.60
  12  -7  -2   14.70    8.40
  12  -7  -2   14.90    8.00
  12  -7  -2   27.00   10.00
 -12   8   2   96.89   13.30
  12  -8  -2  133.89   14.00
  12  -8  -2  159.48   18.60
  12  -8  -2  112.49   17.20
  12  -9  -2   94.29   12.80
  12  -9  -2   75.99   13.80
  12 -10  -2   32.40   11.70
 -11 -10   2   71.59   13.70
 -11 -10   2   70.89   13.30
  11  10  -2   67.29   13.00
 -11  -9   2   34.40   11.20
 -11  -9   2   40.20   11.30
  11   9  -2   35.30   10.50
 -11  -8   2   47.00   10.40
 -11  -8   2   35.20   10.70
  11   8  -2   66.69   11.50
 -11  -7   2   31.10    8.90
 -11  -7   2   53.79   11.30
  11   7  -2   42.10    9.50
  11   7  -2   39.60    8.30
 -11  -6   2  248.68   19.20
  11   6  -2  298.67   17.40
  11   6  -2  261.97   17.80
  11   6  -2  273.57   18.30
 -11  -5   2   18.50    5.50
 -11  -5   2   29.60    9.40
  11   5  -2   17.60    6.10
  11   5  -2   15.70    7.10
  11   5  -2   17.80    7.90
  11   5  -2   20.10    7.50
 -11  -4   2  481.85   20.50
 -11  -4   2  479.45   23.70
  11   4  -2  486.85   22.50
  11   4  -2  475.65   22.40
  11   4  -2  427.26   22.60
  11   4  -2  465.35   21.30
  11   4  -2  489.75   22.60
 -11  -3   2   17.90    5.20
 -11  -3   2   14.80    4.80
 -11  -3   2   16.70    5.80
 -11  -3   2   30.20    8.50
 -11  -3   2   17.80    3.90
  11   3  -2   10.00    7.10
  11   3  -2   24.10    6.60
  11   3  -2   19.40    7.00
  11   3  -2   19.10    6.40
  11   3  -2   16.70    6.10
 -11  -2   2    6.00    6.10
 -11  -2   2    6.40    4.60
 -11  -2   2    0.90    5.20
 -11  -2   2    5.60    5.20
 -11  -2   2    8.40    4.30
  11   2  -2    7.10    5.50
  11   2  -2    7.80    5.00
  11   2  -2   12.30    5.80
  11   2  -2   -2.10    5.80
  11   2  -2    8.30    5.60
 -11  -1   2   28.40    6.60
 -11  -1   2   24.70    6.10
 -11  -1   2   25.90    6.80
 -11  -1   2   25.10    5.40
 -11  -1   2   32.60    6.70
  11   1  -2   24.40    6.60
  11   1  -2   24.70    6.20
  11   1  -2   26.00    7.60
  11   1  -2   18.10    5.60
  11   1  -2   28.50    6.10
 -11   0   2   12.70    5.80
 -11   0   2    0.50    5.30
 -11   0   2    1.90    5.00
 -11   0   2   -1.80    4.40
 -11   0   2   -2.30    4.70
  11   0  -2    1.00    5.80
  11   0  -2   -2.90    4.70
  11   0  -2   -1.80    4.40
  11   0  -2   -2.90    4.50
  11   0  -2   -6.00    4.20
  11   0  -2    0.90    4.00
 -11   1   2   17.00    6.00
 -11   1   2   17.80    6.40
 -11   1   2   16.50    6.10
 -11   1   2   24.90    7.20
  11  -1  -2   21.40    5.10
  11  -1  -2   20.00    6.80
  11  -1  -2   12.30    4.80
  11  -1  -2   28.40    7.60
  11  -1  -2   28.90    7.50
 -11   2   2   12.10    6.10
 -11   2   2    8.50    5.60
 -11   2   2    4.30    5.30
 -11   2   2   14.20    5.80
 -11   2   2    3.70    5.80
  11  -2  -2   -2.00    5.30
  11  -2  -2    0.50    1.50
  11  -2  -2    8.70    5.60
  11  -2  -2    3.40    4.90
  11  -2  -2   -0.40    6.00
  11  -2  -2   13.50    5.70
 -11   3   2    1.30    6.70
 -11   3   2   21.30    6.50
 -11   3   2   16.90    6.10
 -11   3   2   27.20    7.70
 -11   3   2   14.00    7.30
 -11   3   2   24.90    6.70
  11  -3  -2    6.20    6.50
  11  -3  -2   22.20    7.70
  11  -3  -2   25.60    6.10
  11  -3  -2   32.10    8.40
  11  -3  -2    3.90    4.80
  11  -3  -2    9.10    5.50
 -11   4   2  462.95   25.40
 -11   4   2  482.35   21.50
 -11   4   2  472.85   23.00
 -11   4   2  527.85   24.00
 -11   4   2  526.15   25.90
 -11   4   2  476.75   23.00
  11  -4  -2  481.65   22.60
  11  -4  -2  537.95   22.20
  11  -4  -2  501.25   22.20
  11  -4  -2  505.25   24.60
  11  -4  -2  492.85   24.60
  11  -4  -2  476.95   19.40
  11  -4  -2  479.75   19.90
 -11   5   2    9.70    6.60
 -11   5   2   22.00    7.90
 -11   5   2   26.90    9.10
 -11   5   2   16.60    7.70
 -11   5   2    9.70    8.40
 -11   5   2   13.00    8.70
  11  -5  -2   27.10    6.00
  11  -5  -2   11.30    7.20
  11  -5  -2   24.00    7.00
  11  -5  -2   11.30    7.50
  11  -5  -2   25.00    6.80
  11  -5  -2   13.60    7.80
  11  -5  -2   22.40    5.80
 -11   6   2  249.78   19.10
 -11   6   2  280.77   19.50
 -11   6   2  273.27   17.20
 -11   6   2  295.87   21.50
 -11   6   2  250.27   18.60
 -11   6   2  265.87   20.70
  11  -6  -2  272.87   17.00
  11  -6  -2  244.48   19.70
  11  -6  -2  264.77   13.00
  11  -6  -2  283.57   16.60
  11  -6  -2  271.07   19.40
 -11   7   2   22.20    9.20
 -11   7   2   24.70   11.80
  11  -7  -2   38.60    9.80
  11  -7  -2    7.30    7.40
  11  -7  -2   30.70    8.00
  11  -7  -2   45.00   10.60
 -11   8   2   57.09   11.30
  11  -8  -2   73.79   12.00
  11  -8  -2   51.19   11.30
  11  -8  -2   55.39    9.20
 -11   9   2   28.20   10.60
  11  -9  -2   40.60   11.10
  11  -9  -2   47.40   12.60
  11  -9  -2   42.00   10.60
  11 -10  -2   56.89   13.50
 -10 -10   2   43.40   11.10
 -10 -10   2   63.79   12.80
  10  10  -2   47.60   12.00
 -10  -9   2   29.30   10.30
 -10  -9   2   37.30   11.00
  10   9  -2   16.10    8.60
 -10  -8   2   57.39   11.10
 -10  -8   2   61.09   11.00
  10   8  -2   58.39   12.20
  10   8  -2   62.99   11.20
 -10  -7   2    4.00    8.00
 -10  -7   2   10.30    7.20
  10   7  -2   -2.80    5.50
  10   7  -2    4.30    6.50
 -10  -6   2  154.18   15.70
 -10  -6   2  154.18   15.10
  10   6  -2  141.09   13.80
  10   6  -2  113.69   12.50
  10   6  -2  118.39   13.90
  10   6  -2  131.69   18.80
 -10  -5   2  225.28   13.00
 -10  -5   2  223.18   16.90
  10   5  -2  238.08   14.80
  10   5  -2  242.68   16.00
  10   5  -2  227.68   15.60
  10   5  -2  232.28   15.70
 -10  -4   2   -2.00    6.70
 -10  -4   2    5.10    5.00
  10   4  -2    2.20    5.60
  10   4  -2    6.10    6.50
  10   4  -2    0.90    5.60
  10   4  -2    4.60    5.70
  10   4  -2    2.40    4.90
 -10  -3   2  288.57   11.90
 -10  -3   2  267.87   14.00
 -10  -3   2  295.67   16.80
 -10  -3   2  247.68   10.60
 -10  -3   2  249.48   13.90
  10   3  -2  291.37   16.30
  10   3  -2  304.07   15.90
  10   3  -2  254.27   14.50
  10   3  -2  263.87   15.40
  10   3  -2  263.57   15.20
 -10  -2   2   33.00    5.00
 -10  -2   2   27.20    5.90
 -10  -2   2   37.00    6.00
 -10  -2   2   43.60    6.60
 -10  -2   2   31.60    7.40
  10   2  -2   39.40    7.20
  10   2  -2   35.00    6.60
  10   2  -2   41.80    7.10
  10   2  -2   52.59    8.60
  10   2  -2   40.40    7.00
 -10  -1   2    7.30    4.20
 -10  -1   2    1.20    5.50
 -10  -1   2    0.40    5.10
 -10  -1   2    6.40    4.50
 -10  -1   2   -2.70    4.20
  10   1  -2   -0.80    5.30
  10   1  -2   -7.20    4.20
  10   1  -2    5.60    5.00
  10   1  -2    5.00    4.80
  10   1  -2   -0.10    4.00
 -10   0   2  153.78   11.30
 -10   0   2  160.18   10.30
 -10   0   2  158.98   11.60
 -10   0   2  156.18   11.30
 -10   0   2  153.18   12.40
  10   0  -2  146.39   11.10
  10   0  -2  136.99   12.10
  10   0  -2  143.49   11.00
  10   0  -2  139.39   11.60
  10   0  -2  150.38   10.90
  10   0  -2  154.48   12.00
 -10   1   2    2.90    4.70
 -10   1   2    5.80    4.70
 -10   1   2   -5.10    4.90
 -10   1   2    2.00    5.10
 -10   1   2   -2.00    1.10
  10  -1  -2    0.70    5.20
  10  -1  -2   -1.60    3.20
  10  -1  -2    3.90    5.30
  10  -1  -2    0.50    3.30
  10  -1  -2   -1.40    4.30
  10  -1  -2    0.00    4.10
 -10   2   2   23.00    6.10
 -10   2   2   25.50    5.90
 -10   2   2   34.10    5.90
 -10   2   2   36.60    6.80
 -10   2   2   32.10    7.10
  10  -2  -2   46.30    7.00
  10  -2  -2   34.70    6.20
  10  -2  -2   26.30    6.80
  10  -2  -2   25.40    6.10
  10  -2  -2   33.20    6.00
  10  -2  -2   32.40    7.10
 -10   3   2  311.57   16.60
 -10   3   2  269.97   15.70
 -10   3   2  250.87   17.20
 -10   3   2  285.77   15.80
 -10   3   2  253.47   14.30
 -10   3   2  315.67   18.40
  10  -3  -2  268.07   15.60
  10  -3  -2  283.37   14.80
  10  -3  -2  298.27   15.40
  10  -3  -2  264.27   13.80
  10  -3  -2  290.97   17.20
  10  -3  -2  264.37   16.70
 -10   4   2   10.80    6.30
 -10   4   2   12.10    7.10
 -10   4   2   -8.20    7.20
 -10   4   2   -2.80    6.20
 -10   4   2    0.20    5.20
 -10   4   2   13.10    6.70
  10  -4  -2    7.70    6.20
  10  -4  -2    0.10    4.90
  10  -4  -2    2.10    4.80
  10  -4  -2    2.70    5.00
  10  -4  -2   12.60    7.00
  10  -4  -2    4.50    5.90
  10  -4  -2    9.90    5.40
 -10   5   2  214.08   16.30
 -10   5   2  261.77   17.30
 -10   5   2  246.98   15.00
 -10   5   2  217.88   16.60
 -10   5   2  230.18   18.10
 -10   5   2  214.68   18.30
  10  -5  -2  251.07   15.40
  10  -5  -2  219.68   14.40
  10  -5  -2  223.68   11.50
  10  -5  -2  239.18   17.00
  10  -5  -2  227.98   12.10
  10  -5  -2  222.28   17.60
  10  -5  -2  230.88   14.30
 -10   6   2  138.59   16.10
 -10   6   2  146.29   16.20
 -10   6   2  141.79   16.80
 -10   6   2  140.39   15.70
 -10   6   2  121.69   15.20
 -10   6   2  161.08   13.90
  10  -6  -2  143.79   10.40
  10  -6  -2  126.09   14.60
  10  -6  -2  120.49   12.20
  10  -6  -2  119.19   11.80
  10  -6  -2  149.79   16.00
 -10   7   2   -4.50    6.50
 -10   7   2   -9.70    6.70
 -10   7   2   -5.20    7.10
  10  -7  -2   -5.70    6.10
  10  -7  -2    9.10    6.10
  10  -7  -2   -2.70    7.00
  10  -7  -2    0.00    6.90
 -10   8   2   64.19   11.20
  10  -8  -2   50.59   11.10
  10  -8  -2   54.79    8.60
  10  -8  -2   66.89   12.30
 -10   9   2   18.30    9.50
  10  -9  -2   29.80   10.30
  10  -9  -2    8.90    8.70
  10 -10  -2   60.69   12.60
  -9 -11   2   49.50   12.80
  -9 -11   2   47.50   12.50
  -9 -10   2   57.09   12.20
  -9 -10   2   65.39   13.00
   9  10  -2   92.19   14.30
  -9  -9   2   -0.50    7.60
  -9  -9   2    9.60    9.10
   9   9  -2    3.80    8.20
  -9  -8   2   14.70    8.70
  -9  -8   2   18.80    8.40
   9   8  -2    6.30    6.30
   9   8  -2    5.70    7.20
  -9  -7   2   11.00    7.80
  -9  -7   2   -2.80    6.60
   9   7  -2   -1.60    6.90
   9   7  -2    3.20    5.40
  -9  -6   2  276.47   17.60
  -9  -6   2  235.28   17.90
  -9  -6   2  281.47   17.80
   9   6  -2  271.47   17.40
   9   6  -2  281.97   16.50
   9   6  -2  258.47   17.20
  -9  -5   2   54.79    9.20
  -9  -5   2   34.20    6.00
   9   5  -2   52.19    7.80
   9   5  -2   53.29    8.20
   9   5  -2   35.70    7.80
   9   5  -2   37.80    8.00
  -9  -4   2  518.35   23.60
  -9  -4   2  560.34   21.20
   9   4  -2  580.14   22.90
   9   4  -2  537.95   22.80
   9   4  -2  571.24   23.30
   9   4  -2  525.45   22.00
   9   4  -2  567.74   23.40
  -9  -3   2  407.76   17.40
  -9  -3   2  439.36   17.90
  -9  -3   2  419.06   14.30
  -9  -3   2  409.96   19.40
  -9  -3   2  420.56   15.10
   9   3  -2  419.96   18.90
   9   3  -2  420.76   18.10
   9   3  -2  404.86   18.60
   9   3  -2  417.46   18.60
   9   3  -2  417.76   19.20
  -9  -2   2   31.10    5.50
  -9  -2   2   31.40    6.90
  -9  -2   2   33.90    5.80
  -9  -2   2   45.40    6.40
  -9  -2   2   50.59    7.50
   9   2  -2   28.20    6.40
   9   2  -2   41.20    6.40
   9   2  -2   33.30    6.50
   9   2  -2   51.69    7.00
   9   2  -2   36.00    5.90
  -9  -1   2  107.69    9.40
  -9  -1   2  107.89    9.40
  -9  -1   2  100.89   10.40
  -9  -1   2  114.09   10.20
  -9  -1   2  106.79    8.00
   9   1  -2  111.09    9.80
   9   1  -2  123.29   10.10
   9   1  -2   90.39   10.10
   9   1  -2   97.89    9.10
   9   1  -2  115.79    9.80
  -9   0   2    1.00    4.00
  -9   0   2   -3.00    4.30
  -9   0   2   -7.50    3.40
  -9   0   2    8.30    5.10
  -9   0   2    3.00    3.80
   9   0  -2   -3.10    3.80
   9   0  -2    1.40    3.50
   9   0  -2   -0.80    4.30
   9   0  -2    2.00    3.50
   9   0  -2   -0.20    4.00
   9   0  -2   -6.00    3.60
  -9   1   2   98.79    8.30
  -9   1   2  114.09   10.10
  -9   1   2  119.19   10.00
  -9   1   2  117.79   10.70
  -9   1   2   93.19    9.30
   9  -1  -2  116.29    9.70
   9  -1  -2   96.59    8.70
   9  -1  -2  128.39   11.20
   9  -1  -2  106.69    8.40
  -9   2   2   54.79    8.50
  -9   2   2   40.10    6.50
  -9   2   2   30.40    5.30
  -9   2   2   40.60    6.70
  -9   2   2   29.10    6.60
  -9   2   2   24.10    5.70
   9  -2  -2   39.80    7.00
   9  -2  -2   43.60    7.00
   9  -2  -2   27.90    6.10
   9  -2  -2   39.70    6.00
   9  -2  -2   39.90    6.40
   9  -2  -2   52.29    7.50
  -9   3   2  406.86   20.70
  -9   3   2  451.65   19.20
  -9   3   2  437.96   17.50
  -9   3   2  449.46   18.70
  -9   3   2  411.06   20.80
  -9   3   2  437.56   19.10
   9  -3  -2  404.86   17.80
   9  -3  -2  452.35   20.40
   9  -3  -2  397.26   19.80
   9  -3  -2  387.76   18.00
   9  -3  -2  399.56   16.60
   9  -3  -2  408.56   18.60
  -9   4   2  626.44   26.10
  -9   4   2  581.24   23.60
  -9   4   2  539.65   21.90
  -9   4   2  612.34   24.10
  -9   4   2  578.44   26.30
  -9   4   2  597.34   24.60
   9  -4  -2  559.64   20.70
   9  -4  -2  561.14   20.30
   9  -4  -2  557.54   25.20
   9  -4  -2  560.14   22.70
   9  -4  -2  578.04   25.00
   9  -4  -2  602.74   23.50
   9  -4  -2  589.14   22.50
  -9   5   2   24.10    7.40
  -9   5   2   45.10    8.40
  -9   5   2   31.60    9.50
  -9   5   2   41.70    8.50
  -9   5   2   25.90    7.00
  -9   5   2   44.90    9.00
   9  -5  -2   29.30    8.20
   9  -5  -2   31.70    4.70
   9  -5  -2   44.00    6.40
   9  -5  -2   43.80    7.40
   9  -5  -2   55.99    7.70
   9  -5  -2   45.60    6.80
   9  -5  -2   28.70    7.80
  -9   6   2  266.87   17.70
  -9   6   2  255.77   18.10
  -9   6   2  221.08   17.60
  -9   6   2  280.47   18.00
  -9   6   2  282.57   19.80
  -9   6   2  284.87   19.00
   9  -6  -2  276.97   15.30
   9  -6  -2  240.38   17.30
   9  -6  -2  258.07   14.90
   9  -6  -2  250.17   18.70
  -9   7   2    8.00    7.00
  -9   7   2    4.60    7.40
  -9   7   2    5.00    8.10
  -9   7   2   -7.20    7.30
  -9   7   2   -3.00    8.10
   9  -7  -2   -1.50    5.10
   9  -7  -2   -6.20    6.70
   9  -7  -2    5.50    6.80
   9  -7  -2   15.00    8.00
  -9   8   2   -3.00    7.50
   9  -8  -2   19.90    8.00
   9  -8  -2   -0.50    5.30
   9  -8  -2    2.00    7.50
  -9   9   2    4.00    8.40
   9  -9  -2   -1.20    7.90
   9  -9  -2    7.00    8.80
  -9  10   2   90.69   14.70
   9 -10  -2   72.89   12.80
   9 -10  -2  100.19   15.10
   9 -11  -2   56.09   13.30
  -8 -11   2    9.50   10.00
  -8 -11   2    6.90    9.30
   8  11  -2    1.50    9.20
  -8 -10   2   28.80   10.50
  -8 -10   2   36.70   10.70
   8  10  -2   16.20    9.20
  -8  -9   2   71.09   11.80
  -8  -9   2   85.99   12.80
   8   9  -2   97.49   13.20
  -8  -8   2  453.85   24.40
  -8  -8   2  491.15   25.10
   8   8  -2  501.05   23.90
   8   8  -2  453.85   24.60
  -8  -7   2   81.29   11.50
  -8  -7   2   60.39    9.50
   8   7  -2   68.99    9.50
   8   7  -2   78.89   10.90
  -8  -6   2  305.67   14.30
  -8  -6   2  285.37   18.20
  -8  -6   2  298.17   17.60
   8   6  -2  263.47   17.10
   8   6  -2  284.27   17.40
   8   6  -2  277.87   16.30
  -8  -5   2   10.90    6.00
  -8  -5   2    0.50    4.10
  -8  -5   2   13.20    6.70
   8   5  -2    8.90    6.00
   8   5  -2   -3.10    5.40
   8   5  -2    3.40    5.40
   8   5  -2    1.30    4.70
  -8  -4   2 1997.80   61.79
  -8  -4   2 2147.69   64.49
  -8  -4   2 2087.49   61.79
   8   4  -2 2197.98   63.39
   8   4  -2 2007.70   63.29
   8   4  -2 2071.09   62.99
   8   4  -2 2085.49   63.39
   8   4  -2 2123.99   64.09
  -8  -3   2  677.63   21.20
  -8  -3   2  661.03   23.50
  -8  -3   2  668.13   25.30
  -8  -3   2  668.73   23.60
  -8  -3   2  641.14   20.30
   8   3  -2  652.23   24.70
   8   3  -2  661.13   24.10
   8   3  -2  635.44   24.60
   8   3  -2  631.14   24.30
   8   3  -2  698.53   24.60
  -8  -2   2 2311.07   67.29
  -8  -2   2 2217.88   64.89
  -8  -2   2 2176.98   67.09
  -8  -2   2 2370.26   68.89
  -8  -2   2 2378.16   66.29
   8   2  -2 2261.67   67.89
   8   2  -2 2401.96   67.99
   8   2  -2 2359.66   68.79
   8   2  -2 2252.07   67.69
   8   2  -2 2270.97   68.29
  -8  -1   2  429.46   16.80
  -8  -1   2  402.66   17.50
  -8  -1   2  410.76   16.60
  -8  -1   2  401.66   16.70
  -8  -1   2  398.16   15.00
   8   1  -2  389.26   17.00
   8   1  -2  405.06   17.20
   8   1  -2  404.06   16.80
   8   1  -2  401.96   17.60
   8   1  -2  416.16   16.90
  -8   0   2  162.08   10.90
  -8   0   2  170.38   10.50
  -8   0   2  145.19    8.40
  -8   0   2  182.88   10.50
   8   0  -2  144.29    9.80
   8   0  -2  171.28   10.30
   8   0  -2  176.58   11.20
   8   0  -2  168.38   10.20
   8   0  -2  156.88   10.50
  -8   1   2  378.56   16.10
  -8   1   2  427.76   18.10
  -8   1   2  396.16   17.00
  -8   1   2  423.76   15.70
  -8   1   2  426.36   17.10
   8  -1  -2  408.86   16.60
   8  -1  -2  385.96   17.10
   8  -1  -2  395.66   18.20
   8  -1  -2  394.36   15.80
  -8   2   2 2268.87   65.39
  -8   2   2 2292.77   68.79
  -8   2   2 2334.07   67.39
  -8   2   2 2349.56   69.19
  -8   2   2 2164.48   66.69
  -8   2   2 2319.87   66.19
   8  -2  -2 2126.59   68.19
   8  -2  -2 2235.58   65.29
   8  -2  -2 2302.77   66.69
   8  -2  -2 2228.08   68.39
   8  -2  -2 2235.28   67.29
   8  -2  -2 2313.47   66.99
  -8   3   2  689.03   27.10
  -8   3   2  681.73   23.40
  -8   3   2  687.03   24.80
  -8   3   2  654.43   25.00
  -8   3   2  680.63   26.60
  -8   3   2  692.93   24.40
   8  -3  -2  660.53   24.20
   8  -3  -2  652.73   22.60
   8  -3  -2  623.44   25.80
   8  -3  -2  669.73   23.90
   8  -3  -2  663.23   24.50
   8  -3  -2  665.93   26.00
   8  -3  -2  651.73   22.40
  -8   4   2 2056.29   63.09
  -8   4   2 2081.89   61.29
  -8   4   2 1964.10   64.99
  -8   4   2 2028.10   62.09
  -8   4   2 2152.58   64.89
  -8   4   2 2119.99   63.89
   8  -4  -2 2069.59   59.09
   8  -4  -2 2161.68   61.99
   8  -4  -2 2062.69   62.09
   8  -4  -2 2094.79   60.29
   8  -4  -2 2071.09   62.19
   8  -4  -2 2013.10   64.79
   8  -4  -2 1975.90   63.79
  -8   5   2    8.00    5.60
  -8   5   2    9.90    6.40
  -8   5   2    1.10    6.70
  -8   5   2   14.50    6.30
  -8   5   2    4.20    6.60
  -8   5   2   -1.40    5.80
   8  -5  -2    9.20    4.60
   8  -5  -2    7.70    4.80
   8  -5  -2   10.60    4.80
   8  -5  -2   21.10    7.50
   8  -5  -2   14.30    6.10
   8  -5  -2    9.80    5.20
  -8   6   2  297.27   18.50
  -8   6   2  295.97   17.70
  -8   6   2  294.17   19.30
  -8   6   2  296.47   18.80
  -8   6   2  297.87   18.30
   8  -6  -2  297.37   18.20
   8  -6  -2  315.57   15.40
   8  -6  -2  264.27   14.50
   8  -6  -2  271.27   18.90
  -8   7   2   69.69   11.60
  -8   7   2   79.59   11.20
  -8   7   2   44.30    9.70
  -8   7   2   46.00    9.30
  -8   7   2   65.19   10.40
   8  -7  -2   64.59    8.70
   8  -7  -2   90.09   11.60
   8  -7  -2   79.69   12.10
  -8   8   2  475.35   26.20
  -8   8   2  485.35   25.00
   8  -8  -2  403.26   24.80
   8  -8  -2  442.56   24.10
   8  -8  -2  463.45   18.80
  -8   9   2   99.99   13.30
   8  -9  -2   80.69   12.80
   8  -9  -2   73.79   11.80
  -8  10   2   30.40   10.50
   8 -10  -2   41.90   11.60
   8 -10  -2   33.10   10.50
   8 -11  -2   10.10   10.20
  -7 -11   2   63.09   13.00
  -7 -11   2   68.89   13.40
   7  11  -2   56.09   13.40
  -7 -10   2  441.96   25.50
  -7 -10   2  356.76   24.20
   7  10  -2  425.66   25.60
  -7  -9   2   90.99   12.70
  -7  -9   2   90.59   12.60
   7   9  -2  113.49   14.00
  -7  -8   2   20.60    8.50
  -7  -8   2   26.60    8.30
   7   8  -2   26.20    8.60
   7   8  -2   41.00    8.30
  -7  -7   2   15.60    7.70
  -7  -7   2    2.70    7.30
   7   7  -2   -2.80    6.30
   7   7  -2    4.50    5.80
  -7  -6   2   33.10    7.90
  -7  -6   2   27.90    7.40
  -7  -6   2   33.10    5.70
   7   6  -2   30.90    7.70
   7   6  -2   24.90    6.30
   7   6  -2   24.30    6.60
  -7  -5   2   26.80    6.80
  -7  -5   2   17.60    4.90
  -7  -5   2   26.40    5.00
  -7  -5   2   28.50    6.90
   7   5  -2   25.50    6.20
   7   5  -2   23.30    6.20
   7   5  -2   23.30    5.90
  -7  -4   2    7.30    4.00
  -7  -4   2   13.60    4.10
  -7  -4   2    5.50    5.20
   7   4  -2    4.30    4.70
   7   4  -2   11.90    5.30
   7   4  -2   16.60    4.90
   7   4  -2    8.20    4.90
   7   4  -2   18.80    5.00
  -7  -3   2  156.48    9.50
  -7  -3   2  138.69    9.30
  -7  -3   2  139.29    6.90
  -7  -3   2  137.39   11.00
  -7  -3   2  144.99    7.80
   7   3  -2  133.79   10.10
   7   3  -2  138.69   10.10
   7   3  -2  142.89    9.50
   7   3  -2  146.09   10.10
   7   3  -2  132.09    9.90
  -7  -2   2    2.80    3.50
  -7  -2   2    8.40    3.00
  -7  -2   2    8.90    3.80
  -7  -2   2    6.80    3.90
  -7  -2   2    7.00    4.30
   7   2  -2    3.60    4.10
   7   2  -2    5.00    3.90
   7   2  -2    7.20    4.10
   7   2  -2    6.90    3.70
   7   2  -2   -0.70    4.30
  -7  -1   2  237.98   12.50
  -7  -1   2  272.37   12.50
  -7  -1   2  241.38   12.00
  -7  -1   2  241.08   10.60
  -7  -1   2  258.97   12.10
   7   1  -2  249.58   12.30
   7   1  -2  260.87   12.80
   7   1  -2  246.68   12.00
   7   1  -2  248.58   12.10
   7   1  -2  285.37   12.60
  -7   0   2   -2.80    3.40
  -7   0   2    6.20    4.00
  -7   0   2   -3.30    3.60
  -7   0   2   -1.00    0.70
   7   0  -2   -2.60    4.10
   7   0  -2   -3.80    3.20
   7   0  -2    1.30    3.30
   7   0  -2   -2.40    3.20
   7   0  -2    3.00    3.70
  -7   1   2  267.17   12.40
  -7   1   2  251.37   12.10
  -7   1   2  269.97   11.90
  -7   1   2  242.98   10.90
  -7   1   2  268.07   13.10
   7  -1  -2  254.77   12.10
   7  -1  -2  249.28   13.30
   7  -1  -2  256.27   11.80
   7  -1  -2  260.27   11.60
   7  -1  -2  204.58   10.80
  -7   2   2    3.80    3.90
  -7   2   2    5.10    4.70
  -7   2   2    3.50    3.90
  -7   2   2    7.10    5.10
  -7   2   2    1.70    3.30
  -7   2   2   11.20    4.20
   7  -2  -2    8.80    3.60
   7  -2  -2    3.90    2.90
   7  -2  -2    2.00    3.10
   7  -2  -2   13.80    5.00
   7  -2  -2    6.50    4.20
   7  -2  -2    0.80    3.80
  -7   3   2  159.58   11.70
  -7   3   2  145.29   10.10
  -7   3   2  147.79   10.20
  -7   3   2  149.88    9.20
  -7   3   2  130.09   10.30
  -7   3   2  158.88   12.10
   7  -3  -2  145.29    8.50
   7  -3  -2  125.09    9.50
   7  -3  -2  124.79   10.70
   7  -3  -2  142.59    9.40
   7  -3  -2  149.69   10.90
   7  -3  -2  138.59    8.80
   7  -3  -2  155.58    9.30
  -7   4   2    7.90    5.10
  -7   4   2   12.60    5.30
  -7   4   2   14.20    5.30
  -7   4   2   14.60    4.60
  -7   4   2    7.80    5.50
  -7   4   2   11.80    6.30
   7  -4  -2    8.00    5.50
   7  -4  -2   11.00    4.30
   7  -4  -2   12.10    5.60
   7  -4  -2    7.50    4.40
   7  -4  -2    8.30    4.20
   7  -4  -2   12.70    3.30
   7  -4  -2   15.10    4.50
  -7   5   2   15.00    5.60
  -7   5   2   25.10    6.70
  -7   5   2   21.90    5.50
  -7   5   2   19.80    6.50
  -7   5   2   30.10    7.10
  -7   5   2   25.20    7.20
   7  -5  -2   16.80    4.90
   7  -5  -2   26.40    5.20
   7  -5  -2   20.70    5.70
   7  -5  -2   15.60    5.60
   7  -5  -2   27.70    7.30
   7  -5  -2   16.30    4.90
  -7   6   2   31.60    8.00
  -7   6   2   30.10    7.80
  -7   6   2   36.50    8.30
  -7   6   2   22.10    7.10
  -7   6   2   38.60    8.60
   7  -6  -2   25.10    8.20
   7  -6  -2   20.80    5.20
   7  -6  -2   44.00    8.40
   7  -6  -2   38.30    6.10
  -7   7   2    1.60    6.90
  -7   7   2    6.50    8.00
  -7   7   2    1.60    6.70
  -7   7   2   -4.90    6.50
  -7   7   2    9.20    7.00
   7  -7  -2   17.50    7.50
   7  -7  -2    9.00    4.60
   7  -7  -2   -1.80    6.70
  -7   8   2   24.00    8.80
  -7   8   2   23.50    8.60
   7  -8  -2   27.10    8.80
   7  -8  -2   34.10    5.80
   7  -8  -2   38.40    9.50
  -7   9   2   81.09   12.00
   7  -9  -2   87.49   13.30
   7  -9  -2   94.69   13.20
  -7  10   2  410.26   25.60
   7 -10  -2  382.96   25.40
   7 -10  -2  414.76   25.00
   7 -11  -2   54.49   12.80
   7 -11  -2   61.39   12.90
  -6 -11   2   81.29   14.10
  -6 -11   2   90.79   14.40
   6  11  -2   60.89   12.80
  -6 -10   2   19.40    9.20
  -6 -10   2    9.80    9.30
   6  10  -2   12.90    9.30
  -6  -9   2   58.79   11.40
  -6  -9   2   52.79   10.70
   6   9  -2   44.10   10.00
   6   9  -2   28.60    8.60
  -6  -8   2  417.66   23.00
  -6  -8   2  428.06   22.80
   6   8  -2  423.66   21.90
   6   8  -2  480.15   23.70
  -6  -7   2  370.76   20.40
  -6  -7   2  370.56   20.80
   6   7  -2  369.26   20.60
   6   7  -2  406.56   19.70
  -6  -6   2   49.70    7.40
  -6  -6   2   42.90    8.40
  -6  -6   2   53.99    8.70
   6   6  -2   36.60    6.90
   6   6  -2   34.80    7.40
   6   6  -2   34.10    6.90
  -6  -5   2   -4.90    4.60
  -6  -5   2    4.30    5.50
  -6  -5   2    1.80    3.80
  -6  -5   2    0.70    3.80
   6   5  -2    1.00    4.60
   6   5  -2   -3.40    4.50
   6   5  -2    2.00    4.10
  -6  -4   2  157.58    9.50
  -6  -4   2  169.58   11.90
  -6  -4   2  156.28    9.50
   6   4  -2  152.38   10.70
   6   4  -2  151.68   10.80
   6   4  -2  154.58   10.00
   6   4  -2  150.98   10.40
   6   4  -2  172.48   10.50
  -6  -3   2   29.80    3.30
  -6  -3   2   34.30    5.00
  -6  -3   2   40.10    5.50
  -6  -3   2   28.70    5.30
  -6  -3   2   39.00    5.10
   6   3  -2   37.20    5.30
   6   3  -2   35.40    5.00
   6   3  -2   36.40    5.50
   6   3  -2   24.10    4.60
   6   3  -2   35.50    5.40
  -6  -2   2  320.77   12.50
  -6  -2   2  286.17   12.60
  -6  -2   2  294.27   12.60
  -6  -2   2  292.17   13.70
   6   2  -2  298.37   12.70
   6   2  -2  288.17   13.20
   6   2  -2  288.67   13.10
   6   2  -2  288.37   13.00
   6   2  -2  305.37   13.40
  -6  -1   2   15.80    4.40
  -6  -1   2   20.30    4.00
  -6  -1   2   27.50    4.60
  -6  -1   2   13.30    4.20
  -6  -1   2   31.60    5.40
   6   1  -2   25.80    4.80
   6   1  -2   31.30    4.50
   6   1  -2   22.40    4.50
   6   1  -2   27.30    4.70
   6   1  -2   30.50    4.70
  -6   0   2 1485.65   42.70
  -6   0   2 1417.96   42.10
  -6   0   2 1445.56   41.60
  -6   0   2 1387.96   41.80
   6   0  -2 1424.96   42.20
   6   0  -2 1423.66   42.50
   6   0  -2 1375.16   41.70
   6   0  -2 1440.46   41.60
   6   0  -2 1151.38   41.60
  -6   1   2   21.30    4.00
  -6   1   2   21.10    4.40
  -6   1   2   24.20    4.40
  -6   1   2   22.50    4.40
  -6   1   2   26.60    4.50
   6  -1  -2   23.20    4.80
   6  -1  -2   26.20    4.20
   6  -1  -2   14.80    3.40
   6  -1  -2   24.80    4.20
   6  -1  -2   37.70    5.30
   6  -1  -2   21.80    4.50
  -6   2   2  321.47   14.60
  -6   2   2  310.27   12.70
  -6   2   2  311.07   12.70
  -6   2   2  304.37   13.30
  -6   2   2  316.37   14.50
  -6   2   2  303.57   12.00
  -6   2   2  292.07   13.00
   6  -2  -2  317.17   14.20
   6  -2  -2  283.17   12.60
   6  -2  -2  293.77   12.40
   6  -2  -2  297.87   11.70
   6  -2  -2  273.27   12.80
   6  -2  -2  313.67   14.10
  -6   3   2   25.00    5.50
  -6   3   2   55.69    7.10
  -6   3   2   28.90    4.40
  -6   3   2   30.40    5.10
  -6   3   2   36.60    5.50
  -6   3   2   25.10    4.60
  -6   3   2   39.40    5.00
   6  -3  -2   32.40    5.50
   6  -3  -2   42.70    6.10
   6  -3  -2   41.80    5.80
   6  -3  -2   35.80    6.10
   6  -3  -2   39.60    5.20
   6  -3  -2   37.10    4.80
   6  -3  -2   33.50    4.60
  -6   4   2  152.38    9.30
  -6   4   2  155.18   11.30
  -6   4   2  164.78   10.90
  -6   4   2  152.78   10.70
  -6   4   2  152.38    9.50
  -6   4   2  151.58   12.00
  -6   4   2  153.98   11.00
   6  -4  -2  159.78   11.90
   6  -4  -2  166.78    9.70
   6  -4  -2  156.78    9.70
   6  -4  -2  170.38    9.60
   6  -4  -2  174.98    9.50
   6  -4  -2  179.38   11.50
  -6   5   2    2.80    3.80
  -6   5   2    1.70    4.40
  -6   5   2   -1.30    4.60
  -6   5   2   -2.50    5.10
  -6   5   2   -1.30    5.40
  -6   5   2   -5.40    4.40
  -6   5   2    5.10    4.50
   6  -5  -2   -1.40    4.70
   6  -5  -2    6.20    3.90
   6  -5  -2   -0.80    4.90
   6  -5  -2    7.20    4.00
   6  -5  -2    3.30    3.80
   6  -5  -2    6.80    5.60
  -6   6   2   38.70    8.30
  -6   6   2   32.50    7.50
  -6   6   2   28.70    7.70
  -6   6   2   58.09    8.40
  -6   6   2   41.30    8.00
   6  -6  -2   54.39    7.50
   6  -6  -2   55.69    8.50
   6  -6  -2   41.90    8.50
   6  -6  -2   50.89    6.90
  -6   7   2  362.76   21.50
  -6   7   2  362.86   20.90
  -6   7   2  364.86   20.10
  -6   7   2  377.06   19.60
  -6   7   2  382.36   21.60
   6  -7  -2  373.16   20.10
   6  -7  -2  369.16   14.90
   6  -7  -2  351.16   21.50
  -6   8   2  412.86   22.80
  -6   8   2  439.46   23.50
  -6   8   2  404.56   23.80
   6  -8  -2  457.15   23.00
   6  -8  -2  430.96   15.90
   6  -8  -2  404.56   23.60
  -6   9   2   40.10    9.60
  -6   9   2   56.79   14.10
   6  -9  -2   60.79   10.70
   6  -9  -2   49.90   11.40
  -6  10   2   30.40   10.10
   6 -10  -2   32.00   10.20
   6 -10  -2   42.00   11.20
  -6  11   2   53.69   12.40
   6 -11  -2   74.49   13.10
   6 -11  -2   77.89   14.20
  -5 -11   2   12.30    9.70
  -5 -11   2    3.00    8.80
   5  11  -2   -8.00    8.70
  -5 -10   2  113.19   14.80
  -5 -10   2  143.99   16.50
   5  10  -2  166.58   18.70
  -5  -9   2   78.19   11.80
  -5  -9   2   98.99   14.50
   5   9  -2  102.89   15.10
   5   9  -2   95.79   13.50
  -5  -8   2  167.48   15.20
  -5  -8   2  148.79   15.40
   5   8  -2  180.08   15.20
   5   8  -2  151.38   15.50
  -5  -7   2    6.70    7.20
  -5  -7   2    0.90    6.70
   5   7  -2   16.60    7.10
   5   7  -2   15.80    6.20
   5   7  -2    5.50    6.90
  -5  -6   2    8.10    6.00
  -5  -6   2    7.60    6.10
  -5  -6   2   10.70    4.60
   5   6  -2    6.00    5.70
   5   6  -2   14.00    6.00
   5   6  -2    7.90    5.40
  -5  -5   2  308.67   16.00
  -5  -5   2  297.77   16.00
  -5  -5   2  329.57   14.00
  -5  -5   2  311.37   14.10
   5   5  -2  324.77   15.40
   5   5  -2  334.57   16.10
   5   5  -2  329.57   15.40
   5   5  -2  313.77   15.80
  -5  -4   2   16.30    5.10
  -5  -4   2   15.50    4.40
  -5  -4   2   18.00    4.20
  -5  -4   2   16.40    4.10
  -5  -4   2   11.70    5.00
   5   4  -2   18.30    4.50
   5   4  -2   12.90    4.40
   5   4  -2   20.10    5.00
   5   4  -2   10.00    4.50
  -5  -3   2  654.33   21.50
  -5  -3   2  631.24   22.60
  -5  -3   2  637.34   21.60
  -5  -3   2  635.04   19.40
  -5  -3   2  606.84   21.30
   5   3  -2  611.44   21.60
   5   3  -2  626.44   21.80
   5   3  -2  593.84   21.90
   5   3  -2  640.34   22.40
   5   3  -2  653.33   21.80
  -5  -2   2    5.10    3.90
  -5  -2   2    8.50    3.40
  -5  -2   2    3.80    3.40
  -5  -2   2    7.50    3.60
  -5  -2   2    3.00    3.20
   5   2  -2   10.80    3.90
   5   2  -2    7.60    3.50
   5   2  -2    8.10    3.30
   5   2  -2    5.70    3.30
   5   2  -2    3.70    3.60
  -5  -1   2  837.82   26.60
  -5  -1   2  894.91   27.20
  -5  -1   2  857.51   26.70
  -5  -1   2  854.21   27.30
  -5  -1   2  843.22   26.80
   5   1  -2  839.22   27.00
   5   1  -2  811.32   26.60
   5   1  -2  804.42   26.90
   5   1  -2  875.61   26.90
   5   1  -2  846.52   26.70
  -5   0   2    4.80    3.90
  -5   0   2    1.90    3.00
  -5   0   2    4.40    3.80
  -5   0   2    2.40    3.70
  -5   0   2   -5.70    2.90
   5   0  -2   -1.10    1.00
   5   0  -2    3.30    3.30
   5   0  -2   -2.10    3.00
   5   0  -2   -2.40    1.10
   5   0  -2   -3.20    3.40
  -5   1   2  865.31   26.10
  -5   1   2  873.31   27.30
  -5   1   2  830.92   27.60
  -5   1   2  828.12   26.30
  -5   1   2  812.82   26.30
  -5   1   2  807.42   26.40
   5  -1  -2  856.71   26.40
   5  -1  -2  861.31   25.60
   5  -1  -2  820.72   26.60
   5  -1  -2  834.72   26.20
   5  -1  -2  797.22   27.50
   5  -1  -2  892.21   27.30
  -5   2   2    4.40    3.50
  -5   2   2    4.10    3.20
  -5   2   2   13.10    4.70
  -5   2   2    7.90    4.10
  -5   2   2    7.00    3.30
  -5   2   2    5.90    3.10
   5  -2  -2    7.60    3.00
   5  -2  -2    3.70    3.00
   5  -2  -2    4.20    3.90
   5  -2  -2    3.20    3.80
   5  -2  -2    6.00    3.00
   5  -2  -2    8.80    3.50
  -5   3   2  654.73   20.80
  -5   3   2  605.64   22.30
  -5   3   2  624.34   20.20
  -5   3   2  667.73   22.20
  -5   3   2  653.73   21.00
  -5   3   2  591.04   21.50
  -5   3   2  571.84   22.90
   5  -3  -2  626.74   20.90
   5  -3  -2  647.94   21.10
   5  -3  -2  620.54   20.80
   5  -3  -2  627.34   20.70
   5  -3  -2  671.53   22.50
   5  -3  -2  597.24   18.60
   5  -3  -2  604.44   22.80
  -5   4   2   16.10    4.90
  -5   4   2   16.30    5.20
  -5   4   2   21.30    4.70
  -5   4   2    8.10    4.00
  -5   4   2   19.90    4.10
  -5   4   2   16.10    4.70
  -5   4   2   20.50    4.00
  -5   4   2   22.30    4.80
   5  -4  -2   16.90    5.50
   5  -4  -2   14.30    4.70
   5  -4  -2   10.50    3.60
   5  -4  -2   20.30    5.00
   5  -4  -2   16.10    3.90
   5  -4  -2   16.90    3.60
  -5   5   2  322.77   14.80
  -5   5   2  301.07   14.50
  -5   5   2  341.57   16.30
  -5   5   2  330.27   16.80
  -5   5   2  324.87   15.70
  -5   5   2  328.27   16.30
   5  -5  -2  320.57   15.80
   5  -5  -2  316.77   13.50
   5  -5  -2  323.17   13.50
   5  -5  -2  317.17   17.30
   5  -5  -2  314.47   12.70
  -5   6   2   11.60    5.90
  -5   6   2   19.20    6.40
  -5   6   2    7.20    6.20
  -5   6   2   14.20    6.50
  -5   6   2    7.70    6.30
   5  -6  -2   16.30    6.00
   5  -6  -2    6.30    3.60
   5  -6  -2   -1.90    6.20
   5  -6  -2   10.50    3.90
  -5   7   2   10.60    6.80
  -5   7   2   17.90    7.40
  -5   7   2   15.90    7.60
  -5   7   2   -5.40    6.70
  -5   7   2   12.00    6.70
   5  -7  -2   12.30    3.80
   5  -7  -2   -2.00    6.80
   5  -7  -2   10.10    6.80
  -5   8   2  160.68   15.60
  -5   8   2  174.48   15.50
  -5   8   2  155.48   16.00
   5  -8  -2  169.88   15.20
   5  -8  -2  157.98   16.20
   5  -8  -2  170.58    7.90
  -5   9   2   98.79   13.10
  -5   9   2   69.09   12.10
   5  -9  -2   72.89   11.70
   5  -9  -2   82.69   12.50
  -5  10   2  161.28   18.30
   5 -10  -2  119.49   16.30
   5 -10  -2  163.68   17.90
  -5  11   2    2.80    9.50
   5 -11  -2    8.70    9.50
   5 -11  -2   -3.20    8.40
  -4 -11   2  150.98   18.70
  -4 -11   2  141.39   18.00
   4  11  -2  102.09   15.10
  -4 -10   2   67.49   12.40
  -4 -10   2   71.09   12.80
   4  10  -2   63.49   12.30
  -4  -9   2  109.69   14.50
  -4  -9   2  151.78   16.30
   4   9  -2  123.79   15.70
  -4  -8   2  105.09   14.00
  -4  -8   2  103.59   13.60
   4   8  -2  116.39   14.30
  -4  -7   2  260.07   13.30
  -4  -7   2  238.58   12.20
  -4  -7   2  264.97   17.10
  -4  -7   2  248.48   16.50
   4   7  -2  276.97   17.10
   4   7  -2  253.77   17.00
  -4  -6   2   92.89    8.00
  -4  -6   2   97.39   11.50
  -4  -6   2   84.59   11.00
  -4  -6   2  101.79    9.10
  -4  -6   2   80.69   10.70
   4   6  -2  105.29   11.80
   4   6  -2   77.59   10.40
  -4  -5   2 1674.13   51.49
  -4  -5   2 1673.53   51.59
  -4  -5   2 1672.23   49.30
  -4  -5   2 1674.93   48.80
  -4  -5   2 1631.74   49.90
   4   5  -2 1634.74   50.09
   4   5  -2 1682.13   51.69
   4   5  -2 1580.54   50.89
   4   5  -2 1593.64   51.39
  -4  -4   2  303.27   13.10
  -4  -4   2  303.17   12.90
  -4  -4   2  314.47   12.60
  -4  -4   2  311.77   14.60
  -4  -4   2  317.87   14.40
   4   4  -2  293.27   13.70
   4   4  -2  298.97   14.10
   4   4  -2  290.97   13.30
   4   4  -2  305.97   14.10
  -4  -3   2 1093.29   30.70
  -4  -3   2 1067.49   32.40
  -4  -3   2 1080.69   32.70
  -4  -3   2 1070.29   33.60
  -4  -3   2 1021.10   32.30
   4   3  -2 1011.80   32.90
   4   3  -2 1056.59   32.60
   4   3  -2  994.60   33.20
   4   3  -2 1091.99   33.00
  -4  -2   2 1031.10   31.10
  -4  -2   2 1019.90   30.30
  -4  -2   2  967.80   30.20
  -4  -2   2  984.10   29.70
  -4  -2   2  994.70   30.40
   4   2  -2  968.10   30.20
   4   2  -2  982.40   30.50
   4   2  -2  968.60   30.70
   4   2  -2  981.70   30.50
   4   2  -2 1001.00   30.30
  -4  -1   2 1036.90   31.10
  -4  -1   2 1008.80   31.10
  -4  -1   2 1051.39   31.00
  -4  -1   2 1025.20   31.50
  -4  -1   2 1049.00   31.30
   4   1  -2 1018.80   31.10
   4   1  -2 1027.00   31.30
   4   1  -2 1037.60   31.50
   4   1  -2 1005.00   31.20
   4   1  -2 1063.09   31.10
  -4   0   2   41.20    5.10
  -4   0   2   40.80    5.10
  -4   0   2   39.80    5.20
  -4   0   2   46.10    5.10
  -4   0   2   47.90    5.40
   4   0  -2   43.50    4.90
   4   0  -2   44.50    4.90
  -4   1   2 1005.70   30.40
  -4   1   2 1024.60   30.50
  -4   1   2 1030.40   30.00
  -4   1   2 1031.10   30.50
  -4   1   2  993.00   31.40
  -4   1   2 1051.89   31.20
   4  -1  -2 1006.30   31.00
   4  -1  -2 1003.40   30.50
   4  -1  -2  986.50   31.30
   4  -1  -2 1030.00   30.20
   4  -1  -2 1043.60   30.40
   4  -1  -2 1005.20   29.50
  -4   2   2  987.30   31.40
  -4   2   2  962.10   30.10
  -4   2   2  964.50   29.80
  -4   2   2 1035.20   30.90
  -4   2   2  992.00   29.30
  -4   2   2 1005.10   29.50
   4  -2  -2 1018.60   30.70
   4  -2  -2  989.60   31.00
   4  -2  -2 1017.00   28.10
   4  -2  -2  972.50   29.70
   4  -2  -2  938.11   29.30
   4  -2  -2  990.20   29.60
   4  -2  -2  950.20   29.50
  -4   3   2 1045.20   32.90
  -4   3   2 1004.90   31.80
  -4   3   2 1086.09   31.30
  -4   3   2 1080.79   31.30
  -4   3   2 1078.59   33.80
  -4   3   2 1042.10   30.80
  -4   3   2 1071.59   32.70
  -4   3   2 1007.10   32.10
   4  -3  -2 1087.89   31.70
   4  -3  -2  992.80   32.60
   4  -3  -2  987.00   33.40
   4  -3  -2 1054.99   31.50
   4  -3  -2 1046.40   31.10
   4  -3  -2 1054.59   32.10
  -4   4   2  294.87   11.70
  -4   4   2  283.17   13.00
  -4   4   2  294.07   14.30
  -4   4   2  295.37   13.60
  -4   4   2  289.77   13.30
  -4   4   2  310.87   12.50
  -4   4   2  336.07   14.20
  -4   4   2  301.57   11.50
   4  -4  -2  292.67   13.70
   4  -4  -2  310.97   13.80
   4  -4  -2  283.87   14.90
   4  -4  -2  303.17   11.90
   4  -4  -2  286.47   11.80
   4  -4  -2  299.47   11.30
  -4   5   2 1672.93   48.70
  -4   5   2 1613.74   50.99
  -4   5   2 1623.54   50.39
  -4   5   2 1702.83   51.79
  -4   5   2 1710.53   51.69
   4  -5  -2 1658.53   48.10
   4  -5  -2 1679.73   48.10
   4  -5  -2 1500.85   51.69
   4  -5  -2 1619.14   47.00
   4  -5  -2 1622.04   50.69
  -4   6   2  101.89   10.90
  -4   6   2   69.49   10.40
  -4   6   2   94.79    9.80
  -4   6   2   70.59   10.10
  -4   6   2   86.19   11.30
   4  -6  -2   79.49    5.80
   4  -6  -2   96.09    7.30
   4  -6  -2   75.59   11.30
   4  -6  -2   84.79   10.70
  -4   7   2  262.27   16.70
  -4   7   2  261.07   15.40
  -4   7   2  258.67   17.20
  -4   7   2  270.07   16.60
   4  -7  -2  257.87   16.30
   4  -7  -2  222.98   16.80
   4  -7  -2  241.58    9.50
  -4   8   2  113.09   13.50
  -4   8   2  105.09   14.00
  -4   8   2  104.29   13.80
  -4   8   2  103.49   14.60
   4  -8  -2  117.19   13.90
   4  -8  -2   92.89   13.80
  -4   9   2  137.49   15.60
  -4   9   2  169.88   16.80
   4  -9  -2  165.18   16.00
   4  -9  -2  155.18   16.60
  -4  10   2   66.89   12.10
   4 -10  -2   57.59   11.40
   4 -10  -2   77.29   13.20
  -4  11   2  126.69   18.70
   4 -11  -2  153.18   18.00
   4 -11  -2  126.39   17.90
  -3 -11   2   -2.10    7.60
  -3 -11   2   -0.20    9.30
   3  11  -2    8.20    9.70
  -3 -10   2   23.40    9.30
  -3 -10   2   35.90   10.60
   3  10  -2   24.80   10.30
  -3  -9   2  222.48   17.80
  -3  -9   2  222.78   18.50
   3   9  -2  220.78   17.20
   3   9  -2  232.58   18.70
  -3  -8   2   50.79    9.40
  -3  -8   2   38.10    9.40
   3   8  -2   51.69    9.20
   3   8  -2   49.20    9.70
   3   8  -2   33.20    8.00
  -3  -7   2  434.36   16.30
  -3  -7   2  414.96   17.70
  -3  -7   2  441.96   21.70
  -3  -7   2  456.05   21.90
   3   7  -2  426.76   21.50
   3   7  -2  436.46   20.80
   3   7  -2  425.26   21.20
  -3  -6   2  522.65   19.30
  -3  -6   2  519.35   20.00
  -3  -6   2  518.15   18.20
  -3  -6   2  491.45   22.00
  -3  -6   2  490.05   21.90
   3   6  -2  490.15   21.70
   3   6  -2  473.25   21.60
   3   6  -2  524.45   21.60
  -3  -5   2   16.90    5.20
  -3  -5   2   18.60    4.50
  -3  -5   2    9.80    5.60
  -3  -5   2   22.40    4.60
  -3  -5   2   14.50    4.00
   3   5  -2   13.60    5.00
   3   5  -2   20.40    5.10
   3   5  -2    9.00    5.30
   3   5  -2   18.80    5.10
  -3  -4   2   83.29    6.80
  -3  -4   2   68.59    8.10
  -3  -4   2   73.19    6.30
  -3  -4   2   83.29    7.00
  -3  -4   2   79.19    8.10
  -3  -4   2   71.59    3.90
   3   4  -2   79.79    8.00
   3   4  -2   95.59    7.70
   3   4  -2   78.49    7.80
   3   4  -2   81.79    7.50
  -3  -3   2 1698.63   48.20
  -3  -3   2 1665.83   47.40
  -3  -3   2 1648.14   46.10
  -3  -3   2 1727.73   49.10
  -3  -3   2 1638.74   47.70
  -3  -3   2 1543.55   48.50
   3   3  -2 1627.44   47.70
   3   3  -2 1576.94   48.70
   3   3  -2 1583.64   48.20
   3   3  -2 1666.73   48.50
  -3  -2   2  691.83   21.90
  -3  -2   2  695.63   22.70
  -3  -2   2  672.73   21.90
  -3  -2   2  680.93   21.60
   3   2  -2  666.73   22.20
   3   2  -2  722.93   22.20
   3   2  -2  696.33   22.10
   3   2  -2  710.23   22.70
  -3  -1   2  774.82   22.80
  -3  -1   2  712.03   22.50
  -3  -1   2  775.62   22.70
  -3  -1   2  763.02   22.90
   3   1  -2  752.82   22.70
   3   1  -2  721.73   23.90
   3   1  -2  706.83   22.60
   3   1  -2  736.93   22.80
   3   1  -2  728.83   22.50
  -3   0   2    2.10    2.20
  -3   0   2    0.90    2.20
  -3   0   2   -0.20    1.70
  -3   0   2    1.00    1.80
   3   0  -2    1.30    2.30
   3   0  -2   -0.30    1.80
  -3   1   2  727.63   22.10
  -3   1   2  732.13   22.60
  -3   1   2  740.13   22.10
  -3   1   2  728.13   21.90
  -3   1   2  753.92   21.50
  -3   1   2  743.33   22.90
   3  -1  -2  724.83   21.00
   3  -1  -2  763.72   22.60
   3  -1  -2  734.83   21.70
   3  -1  -2  744.23   22.20
   3  -1  -2  743.23   21.90
   3  -1  -2  717.73   22.60
  -3   2   2  677.83   21.20
  -3   2   2  687.43   20.40
  -3   2   2  658.13   21.60
  -3   2   2  679.73   21.40
  -3   2   2  669.43   22.30
  -3   2   2  666.13   21.00
  -3   2   2  679.23   20.10
   3  -2  -2  667.93   21.50
   3  -2  -2  690.73   20.60
   3  -2  -2  670.63   21.60
   3  -2  -2  719.63   22.20
   3  -2  -2  656.83   20.50
   3  -2  -2  676.33   20.60
  -3   3   2 1612.94   47.70
  -3   3   2 1672.33   47.60
  -3   3   2 1666.73   46.30
  -3   3   2 1586.34   48.00
  -3   3   2 1649.54   47.70
  -3   3   2 1652.23   46.00
  -3   3   2 1635.64   48.60
   3  -3  -2 1654.43   46.50
   3  -3  -2 1619.04   46.00
   3  -3  -2 1565.14   48.80
   3  -3  -2 1649.04   48.10
   3  -3  -2 1631.94   47.90
   3  -3  -2 1636.64   46.50
  -3   4   2   80.89    7.50
  -3   4   2   80.19    7.70
  -3   4   2   94.89    5.70
  -3   4   2   76.99    7.20
  -3   4   2   69.29    7.30
  -3   4   2   85.29    7.60
  -3   4   2   73.09    6.00
   3  -4  -2   85.19    7.70
   3  -4  -2   78.89    5.60
   3  -4  -2   66.49    8.30
   3  -4  -2   65.39    8.10
   3  -4  -2   74.89    4.70
   3  -4  -2   78.39    5.50
  -3   5   2   20.50    4.90
  -3   5   2   20.70    5.00
  -3   5   2   11.40    4.10
  -3   5   2   15.10    5.30
  -3   5   2   15.20    4.80
   3  -5  -2   21.00    5.60
   3  -5  -2   18.70    3.40
   3  -5  -2   17.00    3.30
   3  -5  -2   12.70    4.80
   3  -5  -2   16.20    2.50
  -3   6   2  495.45   18.70
  -3   6   2  504.45   20.80
  -3   6   2  488.35   20.80
  -3   6   2  494.95   21.10
  -3   6   2  446.96   21.50
   3  -6  -2  511.25   21.20
   3  -6  -2  498.15   22.00
   3  -6  -2  487.75   15.10
   3  -6  -2  488.45   16.60
  -3   7   2  386.26   20.80
  -3   7   2  440.46   20.90
  -3   7   2  409.26   20.30
  -3   7   2  411.26   18.40
   3  -7  -2  447.96   20.70
   3  -7  -2  409.16   21.20
  -3   8   2   36.20    8.80
  -3   8   2   46.90    8.90
  -3   8   2   42.70    9.10
   3  -8  -2   37.90    8.70
   3  -8  -2   41.40    9.30
  -3   9   2  247.88   18.60
  -3   9   2  219.48   17.90
   3  -9  -2  225.08   18.10
   3  -9  -2  248.58   17.90
  -3  10   2   27.10   10.20
   3 -10  -2   35.60    9.60
   3 -10  -2   24.70    9.80
  -3  11   2   10.40    9.70
   3 -11  -2    0.70    8.80
   3 -11  -2    3.00    8.70
  -2 -12   2   23.70   11.50
  -2 -12   2   -5.50   12.50
  -2 -11   2  169.28   19.00
  -2 -11   2  165.08   18.90
   2  11  -2  188.48   19.70
  -2 -10   2   64.49   11.50
  -2 -10   2   41.10   11.30
   2  10  -2   49.30   11.40
  -2  -9   2  389.86   23.00
  -2  -9   2  391.76   22.80
  -2  -9   2  402.86   15.70
   2   9  -2  368.36   21.70
   2   9  -2  407.66   23.40
  -2  -8   2   -3.30    7.00
  -2  -8   2    6.40    4.50
  -2  -8   2    2.30    6.50
   2   8  -2    0.10    7.10
   2   8  -2    4.80    6.10
   2   8  -2   -2.30    6.60
  -2  -7   2   -0.90    6.20
  -2  -7   2   -5.40    3.40
  -2  -7   2   -3.40    3.90
  -2  -7   2    0.60    6.30
   2   7  -2    2.10    5.30
   2   7  -2    8.20    6.60
   2   7  -2    3.90    6.30
   2   7  -2    2.80    5.70
  -2  -6   2  345.27   15.50
  -2  -6   2  361.26   17.90
  -2  -6   2  354.46   13.50
  -2  -6   2  340.57   14.80
  -2  -6   2  332.97   17.30
   2   6  -2  305.67   16.70
   2   6  -2  345.07   17.20
   2   6  -2  313.07   15.10
   2   6  -2  342.27   17.30
   2   6  -2  320.27   16.70
  -2  -5   2   34.40    6.20
  -2  -5   2   45.30    6.70
  -2  -5   2   43.20    5.70
  -2  -5   2   46.60    7.10
  -2  -5   2   45.70    6.10
   2   5  -2   35.90    5.50
   2   5  -2   26.30    5.70
   2   5  -2   44.00    6.20
   2   5  -2   50.59    7.70
   2   5  -2   28.30    5.50
  -2  -4   2   10.00    4.30
  -2  -4   2    5.40    3.20
  -2  -4   2   10.80    2.30
  -2  -4   2    9.50    3.30
  -2  -4   2   12.30    4.30
  -2  -4   2   13.60    3.80
   2   4  -2   10.60    4.20
   2   4  -2   20.80    4.50
   2   4  -2   19.90    4.30
   2   4  -2   20.30    4.50
   2   4  -2    9.20    4.00
  -2  -3   2  318.77   13.50
  -2  -3   2  339.67   11.40
  -2  -3   2  322.77   13.80
  -2  -3   2  298.47   12.60
  -2  -3   2  359.46   13.40
   2   3  -2  335.97   13.00
   2   3  -2  338.07   13.80
   2   3  -2  329.27   13.30
   2   3  -2  336.47   13.50
  -2  -2   2   15.00    3.50
  -2  -2   2   27.10    3.90
  -2  -2   2   27.60    3.80
  -2  -2   2   22.60    3.70
  -2  -2   2   23.30    4.00
  -2  -2   2   26.80    3.70
   2   2  -2   27.30    4.10
   2   2  -2   21.50    3.60
   2   2  -2   17.30    3.40
   2   2  -2   27.80    4.10
  -2  -1   2  263.87    9.30
  -2  -1   2  261.37    9.50
  -2  -1   2  246.38    9.20
   2   1  -2  247.38    9.20
   2   1  -2  247.98    9.10
  -2   0   2  800.42   22.90
  -2   0   2  783.32   22.70
  -2   0   2  809.92   22.40
   2   0  -2  764.32   22.80
  -2   1   2  246.48    8.30
  -2   1   2  262.77    9.00
  -2   1   2  261.57    8.70
  -2   1   2  247.48    8.50
  -2   1   2  257.57    9.00
   2  -1  -2  252.97    8.20
   2  -1  -2  253.67    9.30
   2  -1  -2  258.77    8.20
   2  -1  -2  267.17    9.00
   2  -1  -2  253.97    8.70
   2  -1  -2  245.98    8.90
  -2   2   2   26.80    3.00
  -2   2   2   22.00    3.10
  -2   2   2   29.30    4.10
  -2   2   2   32.00    4.50
  -2   2   2   27.40    4.40
  -2   2   2   27.30    4.10
   2  -2  -2   24.80    3.90
   2  -2  -2   24.20    3.10
   2  -2  -2   24.30    3.30
   2  -2  -2   34.30    5.00
   2  -2  -2   25.30    3.20
   2  -2  -2   30.90    4.50
  -2   3   2  340.57   10.50
  -2   3   2  337.87   13.20
  -2   3   2  326.07   12.30
  -2   3   2  337.87   12.70
  -2   3   2  349.27   12.60
  -2   3   2  339.87   13.60
   2  -3  -2  329.17   10.40
   2  -3  -2  323.67   12.80
   2  -3  -2  327.47   13.40
   2  -3  -2  331.27   11.00
   2  -3  -2  323.47   14.10
   2  -3  -2  322.97   11.00
  -2   4   2   18.80    2.70
  -2   4   2   18.10    4.00
  -2   4   2    7.20    3.40
  -2   4   2   11.30    3.80
  -2   4   2    7.30    4.80
  -2   4   2   14.20    3.90
   2  -4  -2   14.50    1.90
   2  -4  -2    7.30    3.70
   2  -4  -2   14.80    2.50
   2  -4  -2   14.60    2.50
   2  -4  -2   16.10    4.40
  -2   5   2   36.80    5.70
  -2   5   2   35.40    6.10
  -2   5   2   40.60    5.90
  -2   5   2   42.10    5.60
  -2   5   2   47.80    7.10
   2  -5  -2   46.60    6.80
   2  -5  -2   40.30    4.40
   2  -5  -2   40.40    5.90
   2  -5  -2   43.00    4.40
  -2   6   2  311.37   16.70
  -2   6   2  330.97   16.40
  -2   6   2  325.07   16.30
  -2   6   2  334.37   16.40
  -2   6   2  350.26   14.30
   2  -6  -2  350.06   16.60
   2  -6  -2  331.37   17.20
   2  -6  -2  338.17   11.60
  -2   7   2    3.80    6.10
  -2   7   2   -1.70    5.30
  -2   7   2   -3.90    5.20
   2  -7  -2   -2.60    5.90
   2  -7  -2   -1.10    5.70
  -2   8   2    4.60    6.20
  -2   8   2    4.10    6.30
  -2   8   2    7.10    6.90
   2  -8  -2    9.50    7.10
   2  -8  -2    1.30    6.30
  -2   9   2  408.76   22.10
  -2   9   2  377.06   21.80
   2  -9  -2  383.96   21.40
   2  -9  -2  346.97   21.50
  -2  10   2   40.80   10.70
   2 -10  -2   34.30   10.10
   2 -10  -2   36.10    9.90
  -2  11   2  149.99   19.00
   2 -11  -2  154.48   17.20
   2 -11  -2  147.19   18.00
  -2  12   2    1.00   10.10
   2 -12  -2   12.60    9.80
   2 -12  -2   14.90    9.60
  -1 -12   2   -7.80    9.90
  -1 -11   2   39.10   11.30
  -1 -11   2   52.39   12.20
   1  11  -2   27.20   10.30
  -1 -10   2   30.00   10.00
  -1 -10   2   26.70    9.80
   1  10  -2   40.10   10.80
  -1  -9   2  458.85   24.50
  -1  -9   2  435.96   24.30
   1   9  -2  481.55   25.30
   1   9  -2  432.56   23.60
  -1  -8   2   -6.40    6.70
  -1  -8   2   -0.90    3.40
  -1  -8   2    0.40    6.80
  -1  -8   2   -4.30    2.90
   1   8  -2    2.60    6.40
   1   8  -2    4.70    6.80
   1   8  -2   -2.30    5.20
   1   8  -2    1.30    6.80
  -1  -7   2  753.62   24.40
  -1  -7   2  778.52   30.50
  -1  -7   2  766.92   30.50
  -1  -7   2  797.12   27.20
   1   7  -2  697.03   29.60
   1   7  -2  725.23   29.50
   1   7  -2  800.72   28.20
   1   7  -2  730.53   29.70
   1   7  -2  724.43   29.70
  -1  -6   2  239.68   15.20
  -1  -6   2  269.37   12.90
  -1  -6   2  249.58   15.20
  -1  -6   2  242.18   12.90
   1   6  -2  219.88   14.60
   1   6  -2  255.97   14.70
   1   6  -2  267.17   15.10
   1   6  -2  258.67   13.50
   1   6  -2  264.17   15.30
  -1  -5   2   13.20    4.10
  -1  -5   2   18.00    5.60
  -1  -5   2   18.10    4.50
  -1  -5   2   22.40    5.90
   1   5  -2   10.40    5.20
   1   5  -2   11.70    4.40
   1   5  -2    9.60    4.70
   1   5  -2   15.00    5.00
   1   5  -2   18.00    5.00
   1   5  -2    6.50    4.70
  -1  -4   2    9.90    4.40
  -1  -4   2   -1.30    3.40
  -1  -4   2    6.50    2.40
  -1  -4   2    8.30    3.70
  -1  -4   2    2.10    3.10
   1   4  -2    4.00    3.60
   1   4  -2   13.40    3.60
   1   4  -2    5.00    3.50
   1   4  -2    2.30    3.60
   1   4  -2    1.40    3.40
   1   4  -2    6.00    3.70
  -1  -3   2   48.70    5.90
  -1  -3   2   33.40    4.90
  -1  -3   2   51.69    5.70
  -1  -3   2   54.09    4.70
  -1  -3   2   42.00    6.30
   1   3  -2   49.90    5.90
   1   3  -2   60.09    6.70
   1   3  -2   52.89    6.00
   1   3  -2   34.00    4.20
   1   3  -2   40.50    6.10
   1   3  -2   59.19    6.50
  -1  -2   2   87.09    6.00
  -1  -2   2   96.99    6.20
  -1  -2   2   92.09    5.70
  -1  -2   2   75.29    6.30
  -1  -2   2   84.09    6.50
   1   2  -2   83.39    6.40
   1   2  -2   75.39    5.90
   1   2  -2   90.59    6.40
   1   2  -2   86.49    5.80
   1   2  -2   81.69    6.30
  -1  -1   2    0.80    1.80
  -1  -1   2    0.80    1.60
  -1  -1   2    1.50    1.70
   1   1  -2    0.40    1.50
   1   1  -2    1.30    1.50
  -1   0   2   -0.50    0.50
  -1   0   2   -0.40    0.50
   1   0  -2   -0.20    0.40
  -1   1   2    0.80    1.10
  -1   1   2    1.20    1.10
  -1   1   2    2.60    2.00
  -1   1   2    0.30    0.90
   1  -1  -2    1.10    1.00
   1  -1  -2    5.30    2.20
   1  -1  -2    1.20    1.00
  -1   2   2   84.49    4.30
  -1   2   2   87.39    3.10
  -1   2   2   84.79    6.80
  -1   2   2   89.19    4.40
  -1   2   2   83.19    5.00
  -1   2   2   88.29    5.20
   1  -2  -2   89.39    5.50
   1  -2  -2   91.99    7.40
   1  -2  -2   87.39    5.00
  -1   3   2   45.50    6.80
  -1   3   2   47.90    5.10
  -1   3   2   53.79    4.90
  -1   3   2   49.50    5.00
  -1   3   2   54.49    5.30
   1  -3  -2   48.80    5.70
   1  -3  -2   48.40    5.40
   1  -3  -2   49.70    2.70
   1  -3  -2   52.69    8.00
  -1   4   2    1.30    3.00
  -1   4   2    4.50    3.50
  -1   4   2    7.20    3.20
  -1   4   2    4.80    3.30
   1  -4  -2    4.70    3.70
   1  -4  -2   -0.60    3.10
   1  -4  -2    4.20    1.60
   1  -4  -2    3.40    1.70
  -1   5   2   17.80    4.40
  -1   5   2   14.80    4.30
  -1   5   2    9.70    4.40
  -1   5   2    9.10    4.50
   1  -5  -2   17.10    2.20
   1  -5  -2    8.90    4.60
   1  -5  -2   15.30    2.10
   1  -5  -2   16.20    4.60
  -1   6   2  251.77   14.00
  -1   6   2  244.38   14.20
  -1   6   2  256.47   14.00
  -1   6   2  237.58   13.80
   1  -6  -2  265.77   14.60
   1  -6  -2  258.57   14.00
  -1   7   2  741.33   28.80
  -1   7   2  794.32   29.50
  -1   7   2  760.82   29.00
   1  -7  -2  758.52   29.40
   1  -7  -2  730.33   28.40
  -1   8   2   -1.80    6.00
  -1   8   2   -2.50    5.60
  -1   8   2    1.80    6.70
   1  -8  -2    3.40    6.00
   1  -8  -2   -2.00    6.40
  -1   9   2  474.25   24.10
  -1   9   2  495.45   24.10
   1  -9  -2  406.26   23.30
   1  -9  -2  471.05   23.10
  -1  10   2   26.80    9.20
   1 -10  -2   14.60    8.70
   1 -10  -2    6.80    8.10
  -1  11   2   34.50   11.20
   1 -11  -2   51.49   11.20
   1 -11  -2   42.50   10.90
  -1  12   2    5.70   10.00
   1 -12  -2    2.60    9.50
   1 -12  -2   -2.00    8.90
   0 -12   2   83.89   15.00
   0 -11   2   28.60   10.10
   0 -11   2   33.10   11.40
   0  11  -2   23.80   10.80
   0 -10   2   71.69   12.80
   0 -10   2   87.29   13.10
   0  10  -2   80.19   13.00
   0  -9   2  203.98   10.50
   0  -9   2  197.58   18.10
   0  -9   2  248.58   18.40
   0   9  -2  205.68   18.20
   0   9  -2  219.28   17.30
   0  -8   2   19.50    4.40
   0  -8   2    5.90    3.70
   0  -8   2   16.80    7.90
   0  -8   2    5.90    7.00
   0   8  -2    6.70    7.00
   0   8  -2   14.50    7.20
   0   8  -2   21.00    8.40
   0   8  -2   10.70    7.70
   0  -7   2  128.59   14.00
   0  -7   2  130.99   13.50
   0  -7   2  148.09   10.80
   0  -7   2  148.29    8.30
   0   7  -2  123.99   12.90
   0   7  -2  141.49   13.80
   0   7  -2  111.89   12.60
   0   7  -2  128.59   12.50
   0   7  -2  141.39   14.00
   0  -6   2    8.90    4.40
   0  -6   2   15.50    6.10
   0  -6   2    2.10    4.20
   0  -6   2    8.30    5.90
   0   6  -2    4.30    5.00
   0   6  -2    4.40    5.50
   0   6  -2    7.30    6.00
   0   6  -2    4.00    5.00
   0   6  -2   10.40    5.20
   0   6  -2   13.50    6.00
   0  -5   2 1164.08   39.10
   0  -5   2 1205.78   37.20
   0  -5   2 1185.18   39.30
   0  -5   2 1176.38   38.00
   0   5  -2 1187.48   39.00
   0   5  -2 1183.38   36.90
   0   5  -2 1254.07   39.30
   0   5  -2 1161.58   39.00
   0   5  -2 1212.08   37.40
   0   5  -2 1157.88   38.60
   0  -4   2   71.39    7.30
   0  -4   2   77.69    7.90
   0  -4   2   84.89    7.10
   0  -4   2   83.09    8.20
   0  -4   2   73.79    5.30
   0   4  -2   86.99    7.00
   0   4  -2   85.49    8.00
   0   4  -2   85.39    7.30
   0   4  -2   88.59    8.10
   0   4  -2   66.59    7.50
   0   4  -2   81.29    7.90
   0  -3   2  799.62   26.40
   0  -3   2  806.62   25.60
   0  -3   2  852.81   24.40
   0  -3   2  862.11   26.70
   0  -3   2  773.12   26.10
   0   3  -2  826.12   26.50
   0   3  -2  797.32   26.20
   0   3  -2  790.62   25.20
   0   3  -2  796.82   26.40
   0   3  -2  809.02   26.00
   0   3  -2  781.62   24.90
   0  -2   2   88.59    5.80
   0  -2   2   87.89    6.30
   0  -2   2   84.79    6.10
   0  -2   2   82.39    5.70
   0  -2   2   90.39    6.60
   0  -2   2   80.89    6.60
   0   2  -2   95.79    6.40
   0   2  -2   87.19    6.60
   0   2  -2   90.49    6.10
   0   2  -2  104.39    6.80
   0   2  -2   92.79    6.50
   0   2  -2   95.69    6.80
   0  -1   2 8789.12  254.27
   0  -1   2 9489.65  254.67
   0  -1   2 9149.38  254.47
   0   1  -2 9999.00  257.97
   0   1  -2 9720.93  254.17
   0   1  -2 9353.86  254.67
   0   1   2 9728.23  258.97
   0  -1  -2 9388.06  258.97
   0   2   2   94.09    3.60
   0   2   2   93.59    4.80
   0   2   2   81.99    7.40
   0   2   2   89.79    3.50
   0   2   2   90.39    4.80
   0  -2  -2   90.39    4.90
   0  -2  -2   94.99    8.40
   0  -2  -2   90.89    5.00
   0   3   2  809.02   27.00
   0   3   2  789.42   23.70
   0   3   2  779.82   24.50
   0   3   2  798.02   24.60
   0   3   2  770.02   24.00
   0  -3  -2  829.82   24.70
   0  -3  -2  808.92   24.50
   0   4   2   83.99    6.80
   0   4   2   70.49    6.40
   0   4   2   85.49    6.50
   0   4   2   76.39    6.90
   0  -4  -2   79.99    6.90
   0  -4  -2   81.89    7.00
   0   5   2 1169.78   37.70
   0   5   2 1183.08   37.00
   0   5   2 1215.98   37.80
   0   5   2 1182.78   37.60
   0  -5  -2 1179.08   37.30
   0  -5  -2 1232.28   38.00
   0   6   2   12.70    4.80
   0   6   2    7.60    5.00
   0   6   2    3.90    4.70
   0   6   2   18.90    5.40
   0  -6  -2    0.30    4.70
   0  -6  -2    7.00    5.00
   0   7   2  127.99   11.70
   0   7   2  103.09   12.00
   0   7   2  147.89   12.30
   0  -7  -2  141.29   12.10
   0  -7  -2  139.39   12.50
   0   8   2    9.30    6.50
   0   8   2   11.50    7.10
   0   8   2    3.40    5.90
   0  -8  -2    8.70    6.70
   0  -8  -2   16.50    7.10
   0   9   2  187.28   15.70
   0   9   2  218.88   17.10
   0  -9  -2  229.18   16.90
   0  -9  -2  201.58   15.70
   0  10   2   86.89   12.90
   0 -10  -2   75.19   11.70
   0 -10  -2   80.79   11.50
   0  11   2   26.70   10.40
   0 -11  -2   32.80    9.60
   0 -11  -2   27.70    9.70
   0  12   2   82.49   14.40
   0 -12  -2   91.79   14.00
   0 -12  -2   91.79   14.10
   1 -12   2   28.40   12.00
   1 -11   2    2.50    9.30
   1 -11   2   17.90   10.30
  -1  11  -2    4.40    9.50
   1 -10   2   12.30    9.40
   1 -10   2    6.90    8.10
  -1  10  -2    5.00    8.50
   1  -9   2  113.59    7.10
   1  -9   2  158.28   16.20
   1  -9   2  115.69   15.40
  -1   9  -2  111.99   14.70
  -1   9  -2  104.49   13.60
   1  -8   2  261.47   18.60
   1  -8   2  268.37   18.30
   1  -8   2  240.88   11.40
  -1   8  -2  240.08   17.80
  -1   8  -2  232.78   17.20
  -1   8  -2  252.97   18.20
  -1   8  -2  257.57   19.40
  -1   8  -2  242.98   17.60
   1  -7   2  309.67   13.20
   1  -7   2  309.17   18.80
   1  -7   2  321.17   15.70
   1  -7   2  321.57   18.60
  -1   7  -2  316.27   18.20
  -1   7  -2  292.37   18.20
  -1   7  -2  284.67   17.70
  -1   7  -2  305.37   18.30
  -1   7  -2  303.77   17.20
   1  -6   2   91.29    8.90
   1  -6   2   83.09   10.70
   1  -6   2   78.09    8.90
   1  -6   2   68.59    9.30
   1  -6   2  102.39    7.10
  -1   6  -2  106.99   11.50
  -1   6  -2   79.79   10.40
  -1   6  -2   97.39    9.70
  -1   6  -2   86.39   10.80
  -1   6  -2   58.29    8.00
  -1   6  -2   96.49   10.50
   1  -5   2  344.57   14.80
   1  -5   2  329.87   11.50
   1  -5   2  312.17   16.10
   1  -5   2  322.57   15.10
   1  -5   2  360.46   16.70
  -1   5  -2  325.27   16.20
  -1   5  -2  352.16   14.90
  -1   5  -2  329.97   16.00
  -1   5  -2  336.67   16.10
  -1   5  -2  346.47   16.50
  -1   5  -2  339.07   14.90
  -1   5  -2  346.57   16.50
   1  -4   2  389.96   16.20
   1  -4   2  368.06   14.80
   1  -4   2  364.16   16.00
   1  -4   2  333.87   15.10
   1  -4   2  376.06   13.00
  -1   4  -2  386.06   14.80
  -1   4  -2  365.76   14.50
  -1   4  -2  366.06   15.90
  -1   4  -2  383.46   16.10
  -1   4  -2  361.26   15.60
  -1   4  -2  373.96   16.10
   1  -3   2  482.55   15.40
   1  -3   2  461.95   15.40
   1  -3   2  436.16   17.10
   1  -3   2  457.85   17.40
   1  -3   2  436.96   16.30
   1  -3   2  467.55   17.40
  -1   3  -2  472.65   16.20
  -1   3  -2  447.26   17.10
  -1   3  -2  457.05   16.00
  -1   3  -2  468.45   17.40
  -1   3  -2  446.16   16.70
  -1   3  -2  447.36   17.30
   1  -2   2  491.45   16.60
   1  -2   2  484.95   17.20
   1  -2   2  457.55   15.70
   1  -2   2  507.35   16.10
   1  -2   2  477.85   16.90
   1  -2   2  502.15   17.10
  -1   2  -2  501.85   16.30
  -1   2  -2  495.45   16.80
  -1   2  -2  474.35   17.10
  -1   2  -2  526.75   17.40
  -1   2  -2  501.95   17.10
  -1   2  -2  483.55   16.30
   1  -1   2  267.17    9.50
   1  -1   2  295.07   10.10
   1  -1   2  261.47    9.70
  -1   1  -2  297.47   10.10
  -1   1  -2  277.97   10.20
  -1   1  -2  268.57    9.50
   1   0   2   -0.30    0.70
   1   0   2   -1.70    0.80
   1   0   2   -1.30    1.30
   1   0   2   -0.80    0.80
   1   0   2   -0.70    0.50
  -1   0  -2   -0.20    0.90
  -1   0  -2   -1.50    0.60
  -1   0  -2   -0.30    0.50
  -1   0  -2    0.20    1.30
  -1   0  -2   -0.50    1.00
   1   1   2  267.27    8.20
   1   1   2  259.57    9.00
   1   1   2  260.77   10.50
  -1  -1  -2  257.37   10.70
  -1  -1  -2  275.97    8.10
  -1  -1  -2  275.47    9.00
   1   2   2  459.95   18.10
   1   2   2  485.55   13.80
   1   2   2  488.75   15.00
   1   2   2  475.65   15.00
   1   2   2  474.45   13.70
   1   2   2  494.85   14.30
  -1  -2  -2  498.65   15.00
  -1  -2  -2  492.45   14.60
  -1  -2  -2  498.25   15.00
   1   3   2  449.06   14.50
   1   3   2  433.86   14.90
   1   3   2  467.85   15.50
   1   3   2  433.46   18.40
   1   3   2  441.76   15.30
   1   3   2  465.65   13.40
  -1  -3  -2  456.75   15.40
  -1  -3  -2  483.95   13.50
  -1  -3  -2  456.85   15.20
   1   4   2  349.87   13.50
   1   4   2  343.97   13.80
   1   4   2  368.86   14.20
   1   4   2  370.56   14.20
  -1  -4  -2  376.16   14.30
  -1  -4  -2  376.26   10.90
  -1  -4  -2  378.76   14.10
   1   5   2  341.57   14.60
   1   5   2  323.17   14.20
   1   5   2  367.96   15.00
   1   5   2  338.07   14.60
  -1  -5  -2  325.17   14.30
  -1  -5  -2  338.87   14.70
   1   6   2   87.19    9.30
   1   6   2   73.29    8.90
   1   6   2   69.49    8.60
   1   6   2   81.19    9.00
  -1  -6  -2   73.29    9.30
  -1  -6  -2   85.39    9.40
   1   7   2  285.37   16.30
   1   7   2  321.07   16.40
   1   7   2  321.57   16.50
  -1  -7  -2  269.97   15.80
  -1  -7  -2  301.07   16.50
   1   8   2  252.07   16.10
   1   8   2  242.08   16.60
   1   8   2  243.88   16.10
  -1  -8  -2  254.47   16.60
  -1  -8  -2  265.97   16.40
   1   9   2   99.99   14.10
   1   9   2  105.29   12.70
  -1  -9  -2  102.99   13.10
  -1  -9  -2  106.19   13.30
   1  10   2   -3.30    7.50
   1  10   2    9.20    7.40
  -1 -10  -2    9.00    7.80
  -1 -10  -2    1.30    7.20
   1  11   2    3.20    9.20
  -1 -11  -2    5.80    8.40
  -1 -11  -2   -0.20    7.90
   1  12   2   14.40   10.60
  -1 -12  -2    7.50    9.40
  -1 -12  -2    3.70    9.00
   2 -11   2  122.69   18.40
   2 -11   2  115.09   16.00
  -2  11  -2  138.89   19.50
   2 -10   2   51.69   11.90
   2 -10   2   42.30   10.60
  -2  10  -2   48.90   11.40
   2  -9   2   25.40    9.20
   2  -9   2   22.10    8.10
   2  -9   2   15.40    3.80
  -2   9  -2   18.20    9.50
  -2   9  -2    8.40    7.60
   2  -8   2  215.68   17.80
   2  -8   2  240.68   11.30
   2  -8   2  227.48   18.10
  -2   8  -2  246.58   17.70
  -2   8  -2  215.68   17.00
  -2   8  -2  236.58   17.50
  -2   8  -2  202.68   17.60
  -2   8  -2  233.28   17.60
   2  -7   2    3.30    6.90
   2  -7   2    5.80    3.90
   2  -7   2   -3.90    6.40
   2  -7   2   -1.10    3.90
  -2   7  -2    0.20    5.30
  -2   7  -2    2.10    6.40
  -2   7  -2   -8.60    5.40
  -2   7  -2    7.30    6.80
  -2   7  -2    9.60    6.90
   2  -6   2  108.89    9.90
   2  -6   2  107.19    9.70
   2  -6   2  112.49   11.70
   2  -6   2  101.89   11.70
   2  -6   2  102.59    8.20
  -2   6  -2  108.09   10.50
  -2   6  -2  122.49   12.10
  -2   6  -2  116.49   11.60
  -2   6  -2  105.99   11.10
  -2   6  -2  103.49   11.30
  -2   6  -2   95.19   11.40
   2  -5   2  509.25   16.40
   2  -5   2  458.75   20.50
   2  -5   2  471.95   19.60
   2  -5   2  515.65   18.00
   2  -5   2  541.85   19.60
   2  -5   2  501.85   21.20
  -2   5  -2  488.65   20.90
  -2   5  -2  500.25   19.00
  -2   5  -2  493.95   20.50
  -2   5  -2  479.35   19.20
  -2   5  -2  455.55   20.60
  -2   5  -2  496.05   20.90
  -2   5  -2  512.55   19.30
   2  -4   2  620.74   22.80
   2  -4   2  646.14   20.50
   2  -4   2  651.03   22.30
   2  -4   2  660.03   21.20
   2  -4   2  643.34   23.70
   2  -4   2  636.24   23.40
  -2   4  -2  642.44   21.80
  -2   4  -2  610.74   22.80
  -2   4  -2  645.14   23.80
  -2   4  -2  640.94   23.70
  -2   4  -2  633.24   21.20
  -2   4  -2  652.63   22.00
  -2   4  -2  586.84   23.10
   2  -3   2   88.99    6.80
   2  -3   2   88.49    7.60
   2  -3   2   98.49    6.40
   2  -3   2   80.29    7.70
   2  -3   2   95.69    7.30
   2  -3   2   98.39    6.60
   2  -3   2   96.89    8.10
  -2   3  -2   89.29    8.20
  -2   3  -2   90.69    7.50
  -2   3  -2   76.89    7.40
  -2   3  -2  105.09    8.40
  -2   3  -2   91.69    7.60
  -2   3  -2   87.99    7.00
   2  -2   2  568.54   18.80
   2  -2   2  599.24   18.60
   2  -2   2  551.94   19.20
   2  -2   2  558.24   18.20
  -2   2  -2  556.64   19.70
  -2   2  -2  525.15   19.40
  -2   2  -2  584.14   18.40
  -2   2  -2  515.95   19.00
  -2   2  -2  574.04   18.90
  -2   2  -2  592.84   18.80
   2  -1   2  596.64   22.50
   2  -1   2  568.74   15.90
   2  -1   2  560.34   17.40
   2  -1   2  561.14   18.50
   2  -1   2  582.44   18.20
   2  -1   2  566.34   18.30
   2  -1   2  558.84   17.50
  -2   1  -2  568.04   17.50
  -2   1  -2  562.24   18.40
  -2   1  -2  594.64   18.70
  -2   1  -2  559.74   18.00
   2   0   2 1398.36   41.20
   2   0   2 1408.76   40.50
   2   0   2 1459.15   42.20
   2   0   2 1511.85   41.90
   2   0   2 1494.35   41.40
   2   0   2 1475.25   40.50
   2   0   2 1458.75   41.70
   2   0   2 1459.65   41.70
  -2   0  -2 1472.75   41.20
  -2   0  -2 1515.25   42.20
  -2   0  -2 1424.96   41.70
  -2   0  -2 1487.25   41.80
  -2   0  -2 1548.15   41.20
   2   1   2  512.55   15.70
   2   1   2  550.54   17.10
   2   1   2  548.95   15.70
   2   1   2  568.54   16.60
  -2  -1  -2  579.94   17.30
  -2  -1  -2  558.74   16.50
   2   2   2  554.34   16.40
   2   2   2  572.04   16.50
   2   2   2  545.15   17.30
   2   2   2  553.74   17.20
  -2  -2  -2  557.44   17.30
  -2  -2  -2  538.45   17.20
  -2  -2  -2  597.74   17.40
   2   3   2   87.29    4.90
   2   3   2   86.29    5.50
   2   3   2   86.59    5.40
   2   3   2   83.69    5.80
  -2  -3  -2   98.89    6.20
  -2  -3  -2   90.19    6.10
  -2  -3  -2  102.09    4.90
   2   4   2  656.83   21.10
   2   4   2  618.14   21.50
   2   4   2  677.23   21.30
  -2  -4  -2  618.44   21.30
  -2  -4  -2  661.33   19.20
  -2  -4  -2  626.94   21.50
   2   5   2  504.95   18.30
   2   5   2  492.35   18.70
   2   5   2  476.75   18.10
  -2  -5  -2  478.15   18.70
  -2  -5  -2  490.65   14.80
  -2  -5  -2  475.15   18.40
   2   6   2   91.49    9.70
   2   6   2  102.19    9.40
   2   6   2  104.19    9.70
  -2  -6  -2  116.29   10.10
  -2  -6  -2  100.79    9.70
   2   7   2   -1.40    4.70
   2   7   2   -0.40    5.40
  -2  -7  -2    7.10    5.60
  -2  -7  -2    3.90    5.50
   2   8   2  238.38   15.50
   2   8   2  212.08   16.10
  -2  -8  -2  255.37   16.20
  -2  -8  -2  259.37   15.90
   2   9   2    6.70    7.60
   2   9   2   17.20    6.40
  -2  -9  -2   15.50    7.40
  -2  -9  -2   24.90    7.50
   2  10   2   24.60    9.40
   2  10   2   28.20    9.40
  -2 -10  -2   29.10    9.00
  -2 -10  -2   27.30    8.80
   2  11   2  102.29   14.30
  -2 -11  -2  103.89   15.60
  -2 -11  -2  113.29   15.60
   3 -11   2   62.29   21.00
   3 -11   2   81.49   14.10
   3 -10   2   15.10    9.20
   3 -10   2   17.50   10.40
  -3  10  -2   10.80    9.30
   3  -9   2   17.20    4.40
   3  -9   2   23.30    8.70
   3  -9   2    6.70    8.20
  -3   9  -2   14.30    8.90
   3  -8   2   55.59    8.40
   3  -8   2   61.89    7.40
   3  -8   2   62.19   10.90
   3  -8   2   46.70   10.00
  -3   8  -2   48.00    9.70
  -3   8  -2   78.79   12.00
  -3   8  -2   45.10    9.00
  -3   8  -2   85.99   11.90
  -3   8  -2   66.29   10.40
   3  -7   2  257.37   12.90
   3  -7   2  272.97   15.30
   3  -7   2  268.57   18.30
   3  -7   2  274.77   17.90
  -3   7  -2  220.78   23.70
  -3   7  -2  252.37   17.60
  -3   7  -2  309.67   18.40
  -3   7  -2  268.27   17.90
  -3   7  -2  249.48   17.50
  -3   7  -2  289.57   17.40
   3  -6   2   -3.00    4.30
   3  -6   2   -3.30    3.90
   3  -6   2   -2.20    3.70
   3  -6   2    2.60    6.00
   3  -6   2  -10.10    5.10
  -3   6  -2   -4.60    5.10
  -3   6  -2    2.30    5.40
  -3   6  -2    4.70    5.60
  -3   6  -2   -1.80    6.10
  -3   6  -2   -6.40    5.20
  -3   6  -2   -0.60    5.40
  -3   6  -2    1.30    5.20
   3  -5   2  897.71   29.30
   3  -5   2  893.01   30.30
   3  -5   2  875.21   30.80
   3  -5   2  898.91   31.90
   3  -5   2  952.90   33.00
   3  -5   2  881.81   27.40
  -3   5  -2  897.11   31.90
  -3   5  -2  864.61   32.10
  -3   5  -2  862.21   31.30
  -3   5  -2  895.21   30.20
  -3   5  -2  888.11   28.50
  -3   5  -2  952.00   30.30
  -3   5  -2  877.11   32.30
   3  -4   2   53.59    7.00
   3  -4   2   62.29    7.90
   3  -4   2   57.59    6.40
   3  -4   2   64.89    8.20
   3  -4   2   54.79    6.30
   3  -4   2   58.59    7.40
   3  -4   2   65.09    6.70
  -3   4  -2   60.79    8.10
  -3   4  -2   58.89    7.70
  -3   4  -2   55.79    8.00
  -3   4  -2   70.19    5.70
  -3   4  -2   62.99    8.50
  -3   4  -2   50.59    7.10
  -3   4  -2   65.09    8.00
   3  -3   2  201.68   10.00
   3  -3   2  218.18    9.80
   3  -3   2  200.28   10.90
   3  -3   2  219.48   10.50
   3  -3   2  211.08   11.80
   3  -3   2  221.98   11.50
   3  -3   2  210.48   10.60
  -3   3  -2  222.48    7.70
  -3   3  -2  233.98   11.20
  -3   3  -2  228.18   12.10
  -3   3  -2  219.98   11.50
  -3   3  -2  208.68   10.90
  -3   3  -2  224.18   10.40
  -3   3  -2  193.28   11.60
   3  -2   2 1512.65   46.20
   3  -2   2 1556.34   47.00
   3  -2   2 1633.14   45.70
   3  -2   2 1577.84   46.80
  -3   2  -2 1630.74   45.80
  -3   2  -2 1605.04   46.50
  -3   2  -2 1585.14   46.00
  -3   2  -2 1591.44   47.40
  -3   2  -2 1505.85   46.90
  -3   2  -2 1635.54   47.70
   3  -1   2   84.99    6.80
   3  -1   2   77.59    7.00
   3  -1   2   89.29    6.40
   3  -1   2   81.49    7.10
   3  -1   2   82.89    5.80
   3  -1   2   95.89    6.80
   3  -1   2   80.29    6.00
   3  -1   2   71.59    4.30
  -3   1  -2   79.79    6.40
  -3   1  -2   78.49    6.60
  -3   1  -2   80.89    7.10
  -3   1  -2   83.79    5.50
  -3   1  -2   71.69    7.20
  -3   1  -2   72.49    5.70
  -3   1  -2   74.99    6.50
   3   0   2   -3.10    2.30
   3   0   2    0.00    2.10
   3   0   2   -1.70    1.80
   3   0   2   -0.10    2.20
   3   0   2   -0.30    2.80
   3   0   2   -0.90    2.00
   3   0   2    2.00    2.90
  -3   0  -2    1.70    3.00
  -3   0  -2   -2.80    2.40
  -3   0  -2   -0.70    2.00
  -3   0  -2   -3.70    2.60
  -3   0  -2   -1.60    1.80
  -3   0  -2   -1.90    2.20
  -3   0  -2   -1.60    2.20
   3   1   2   76.59    4.60
   3   1   2   81.39    5.40
   3   1   2   85.09    5.00
   3   1   2   91.19    6.20
  -3  -1  -2   76.99    5.60
  -3  -1  -2   79.99    4.00
  -3  -1  -2   89.59    6.10
  -3  -1  -2   81.49    4.30
   3   2   2 1583.74   45.30
   3   2   2 1572.54   44.40
   3   2   2 1546.65   44.40
   3   2   2 1570.84   45.10
  -3  -2  -2 1623.74   45.30
  -3  -2  -2 1572.74   45.10
   3   3   2  208.78    8.80
   3   3   2  207.88    8.80
   3   3   2  208.88    9.30
   3   3   2  213.38    8.70
  -3  -3  -2  220.28    8.70
  -3  -3  -2  219.68    9.40
  -3  -3  -2  210.98    9.50
   3   4   2   55.79    5.00
   3   4   2   75.89    6.50
   3   4   2   51.79    5.80
   3   4   2   52.19    5.90
  -3  -4  -2   51.49    4.50
  -3  -4  -2   58.99    6.50
  -3  -4  -2   48.10    6.30
   3   5   2  897.41   29.10
   3   5   2  886.01   29.10
   3   5   2  913.11   29.80
  -3  -5  -2  908.31   26.60
  -3  -5  -2  873.61   29.50
  -3  -5  -2  871.21   29.30
   3   6   2   -3.00    3.90
   3   6   2    1.00    4.60
   3   6   2   -0.10    4.50
  -3  -6  -2    3.70    4.80
  -3  -6  -2    0.80    4.60
  -3  -6  -2    1.00    2.30
   3   7   2  261.97   14.70
   3   7   2  258.67   15.50
  -3  -7  -2  283.07   15.60
  -3  -7  -2  257.17   15.10
   3   8   2   55.49    8.30
   3   8   2   64.39    9.50
  -3  -8  -2   64.29    9.00
  -3  -8  -2   63.59    9.30
   3   9   2   35.30    7.60
   3   9   2   31.20    8.60
  -3  -9  -2   12.20    7.40
  -3  -9  -2    8.60    6.80
   3  10   2   23.50    9.00
   3  10   2   14.20   11.00
  -3 -10  -2   19.60    8.00
  -3 -10  -2    9.20    7.90
   3  11   2   54.69   12.10
  -3 -11  -2   77.09   11.70
  -3 -11  -2   37.10    9.90
   4 -11   2    1.60   10.00
   4 -10   2   36.30   10.70
   4 -10   2   30.20   11.30
  -4  10  -2   41.10   11.10
   4  -9   2  119.09   16.50
   4  -9   2  139.19   17.00
   4  -9   2  159.78    9.80
  -4   9  -2  137.39   17.00
   4  -8   2  674.03   30.80
   4  -8   2  704.73   27.60
   4  -8   2  737.73   32.50
   4  -8   2  719.13   24.80
  -4   8  -2  714.03   31.10
  -4   8  -2  681.63   30.30
  -4   8  -2  733.13   31.60
  -4   8  -2  642.54   30.80
  -4   8  -2  681.73   31.30
   4  -7   2   13.60    8.20
   4  -7   2   -3.60    5.00
   4  -7   2    4.10    6.70
   4  -7   2    7.30    4.60
  -4   7  -2    6.40    7.10
  -4   7  -2   18.20    7.20
  -4   7  -2    9.70    7.50
  -4   7  -2   28.70    7.70
  -4   7  -2   22.20    8.10
  -4   7  -2    6.40    6.40
   4  -6   2 1009.40   37.40
   4  -6   2  980.30   36.30
   4  -6   2  933.91   34.10
   4  -6   2 1011.70   34.10
   4  -6   2  949.51   32.50
  -4   6  -2 1086.39   34.70
  -4   6  -2  948.71   36.60
  -4   6  -2  964.30   34.50
  -4   6  -2  991.70   35.90
  -4   6  -2  983.90   36.30
  -4   6  -2 1087.29   37.50
  -4   6  -2  979.90   31.70
   4  -5   2  581.24   23.10
   4  -5   2  556.24   21.70
   4  -5   2  613.34   24.30
   4  -5   2  636.24   23.00
   4  -5   2  572.14   20.10
   4  -5   2  612.54   20.40
   4  -5   2  611.94   25.20
  -4   5  -2  595.94   22.60
  -4   5  -2  598.74   23.80
  -4   5  -2  635.94   25.50
  -4   5  -2  598.44   23.00
  -4   5  -2  577.94   24.20
  -4   5  -2  599.34   19.80
  -4   5  -2  614.44   24.90
   4  -4   2  703.23   26.70
   4  -4   2  703.73   23.20
   4  -4   2  715.13   24.80
   4  -4   2  680.03   24.30
   4  -4   2  679.23   23.00
   4  -4   2  696.63   25.30
   4  -4   2  700.63   26.00
  -4   4  -2  731.33   24.90
  -4   4  -2  697.53   21.10
  -4   4  -2  738.93   24.40
  -4   4  -2  670.13   25.20
  -4   4  -2  705.13   26.20
  -4   4  -2  678.13   26.40
  -4   4  -2  730.43   26.90
   4  -3   2  506.75   19.40
   4  -3   2  494.85   18.20
   4  -3   2  443.76   18.10
   4  -3   2  483.95   17.10
   4  -3   2  487.95   17.50
   4  -3   2  453.75   18.60
   4  -3   2  472.85   19.60
  -4   3  -2  497.85   17.60
  -4   3  -2  513.15   19.40
  -4   3  -2  477.95   18.10
  -4   3  -2  505.15   19.90
  -4   3  -2  511.05   19.80
  -4   3  -2  482.05   18.50
   4  -2   2 2500.35   69.19
   4  -2   2 2348.97   69.69
   4  -2   2 2482.45   70.89
   4  -2   2 2457.15   70.59
  -4   2  -2 2532.65   71.49
  -4   2  -2 2490.65   70.19
  -4   2  -2 2085.49   69.29
  -4   2  -2 2492.05   69.49
  -4   2  -2 2486.45   69.39
  -4   2  -2 2576.54   71.19
   4  -1   2  252.97   10.70
   4  -1   2  248.68   10.30
   4  -1   2  245.48   10.80
   4  -1   2  221.98   11.00
   4  -1   2  242.78   11.20
   4  -1   2  240.78   12.00
   4  -1   2  254.27   11.70
  -4   1  -2  242.18   12.20
  -4   1  -2  248.38   11.30
  -4   1  -2  252.07   10.10
  -4   1  -2  250.57   10.40
  -4   1  -2  267.57   11.50
  -4   1  -2  242.98   11.70
  -4   1  -2  237.98   10.40
   4   0   2  359.36   14.20
   4   0   2  363.76   12.40
   4   0   2  348.07   12.90
   4   0   2  362.36   14.10
   4   0   2  342.37   13.90
   4   0   2  356.16   13.50
   4   0   2  344.67   13.20
  -4   0  -2  364.46   13.20
  -4   0  -2  388.26   14.50
  -4   0  -2  354.56   11.70
  -4   0  -2  357.86   13.20
  -4   0  -2  388.96   14.60
  -4   0  -2  365.66   12.40
   4   1   2  253.27   10.30
   4   1   2  236.68    8.30
   4   1   2  239.78    9.70
   4   1   2  235.88    9.50
   4   1   2  234.78   10.90
   4   1   2  245.98    8.50
  -4  -1  -2  229.98   10.50
  -4  -1  -2  232.58   10.30
  -4  -1  -2  249.18    9.00
  -4  -1  -2  245.68    9.10
   4   2   2 2461.65   69.69
   4   2   2 2478.35   70.29
   4   2   2 2442.36   69.39
   4   2   2 2525.05   70.69
  -4  -2  -2 2455.35   68.09
  -4  -2  -2 2601.54   70.59
  -4  -2  -2 2489.25   70.19
  -4  -2  -2 2496.15   68.09
   4   3   2  466.85   16.70
   4   3   2  476.15   16.10
   4   3   2  470.95   16.10
   4   3   2  467.65   16.40
  -4  -3  -2  479.65   16.90
  -4  -3  -2  491.55   16.40
   4   4   2  679.53   23.00
   4   4   2  718.43   22.70
   4   4   2  714.23   22.90
   4   4   2  710.13   23.80
  -4  -4  -2  705.83   22.30
  -4  -4  -2  695.13   23.50
  -4  -4  -2  670.23   23.40
   4   5   2  566.94   19.50
   4   5   2  570.64   21.50
   4   5   2  581.34   21.00
   4   5   2  593.64   21.30
  -4  -5  -2  611.44   19.30
  -4  -5  -2  591.34   21.50
  -4  -5  -2  576.64   21.50
   4   6   2  984.50   33.70
   4   6   2 1033.90   33.60
  -4  -6  -2  984.60   33.90
  -4  -6  -2 1009.60   33.70
  -4  -6  -2 1001.00   30.30
   4   7   2    2.00    4.70
   4   7   2    6.50    5.80
  -4  -7  -2    7.80    3.00
  -4  -7  -2    3.10    5.80
  -4  -7  -2   10.40    6.10
   4   8   2  691.23   27.60
   4   8   2  676.03   28.20
  -4  -8  -2  694.63   27.30
  -4  -8  -2  682.93   27.70
   4   9   2  143.79   15.00
   4   9   2  144.49   13.70
  -4  -9  -2  165.88   14.30
  -4  -9  -2  159.18   14.70
   4  10   2   25.60    9.10
  -4 -10  -2   36.80    9.40
  -4 -10  -2   21.50    8.20
   4  11   2   10.70    9.20
  -4 -11  -2    1.60    8.30
  -4 -11  -2   11.70    8.30
   5 -11   2  205.78   21.80
   5 -10   2   66.19   13.40
   5 -10   2   85.49   14.70
  -5  10  -2   44.80   11.60
   5  -9   2  220.08   20.20
   5  -9   2  225.98   12.90
   5  -9   2  302.47   20.90
  -5   9  -2  237.28   19.90
   5  -8   2   -1.70    4.30
   5  -8   2   -3.50    6.80
   5  -8   2   -4.50    6.80
   5  -8   2    2.10    5.30
  -5   8  -2   -3.00    7.30
  -5   8  -2   -1.60    7.30
  -5   8  -2    2.30    6.50
  -5   8  -2   -9.90    6.80
   5  -7   2    4.50    7.10
   5  -7   2    4.90    5.60
   5  -7   2    4.70    7.50
   5  -7   2    4.20    4.80
  -5   7  -2   25.80    8.50
  -5   7  -2    8.10    7.00
  -5   7  -2   14.00    7.50
  -5   7  -2    0.00    7.20
  -5   7  -2    2.50    7.50
  -5   7  -2    5.50    5.30
  -5   7  -2   -6.70    7.10
   5  -6   2   94.69   12.80
   5  -6   2   92.69   10.90
   5  -6   2  104.99   10.60
   5  -6   2   92.99    9.40
   5  -6   2   95.39   12.40
  -5   6  -2   95.99   13.20
  -5   6  -2   91.99    8.30
  -5   6  -2  111.09   13.40
  -5   6  -2  100.89   13.00
  -5   6  -2   98.39   11.90
  -5   6  -2  115.29   12.80
  -5   6  -2  104.79   13.00
   5  -5   2  526.95   19.50
   5  -5   2  542.65   24.20
   5  -5   2  547.95   21.20
   5  -5   2  551.14   21.70
   5  -5   2  582.04   22.60
   5  -5   2  547.25   23.40
  -5   5  -2  575.04   21.80
  -5   5  -2  508.65   22.50
  -5   5  -2  512.45   23.20
  -5   5  -2  545.95   22.20
  -5   5  -2  553.84   24.20
  -5   5  -2  545.25   17.70
  -5   5  -2  581.84   24.70
   5  -4   2  232.58   11.70
   5  -4   2  236.58   13.10
   5  -4   2  242.48   14.80
   5  -4   2  236.58   11.50
   5  -4   2  230.38   12.50
   5  -4   2  253.07   14.10
   5  -4   2  258.37   13.10
  -5   4  -2  230.48   14.70
  -5   4  -2  250.17   14.30
  -5   4  -2  277.87   14.00
  -5   4  -2  253.47   13.60
  -5   4  -2  235.38   12.60
  -5   4  -2  240.98   14.60
   5  -3   2   27.20    5.00
   5  -3   2   51.69    7.00
   5  -3   2   46.80    6.00
   5  -3   2   38.70    5.20
   5  -3   2   51.09    7.10
   5  -3   2   50.49    7.00
   5  -3   2   36.80    5.10
  -5   3  -2   44.30    6.50
  -5   3  -2   41.40    6.40
  -5   3  -2   42.20    5.70
  -5   3  -2   37.90    5.30
  -5   3  -2   46.70    6.20
  -5   3  -2   42.90    6.80
   5  -2   2  259.67   11.50
   5  -2   2  253.77   11.20
   5  -2   2  262.87   13.40
   5  -2   2  239.48   12.00
   5  -2   2  282.57   13.10
   5  -2   2  228.98   12.10
   5  -2   2  244.78   11.60
  -5   2  -2  250.67   13.60
  -5   2  -2  247.38   11.70
  -5   2  -2  261.07   12.90
   5  -1   2  893.81   30.20
   5  -1   2  925.91   28.60
   5  -1   2  962.80   29.00
   5  -1   2  900.01   30.20
   5  -1   2  910.61   30.50
   5  -1   2  940.61   29.90
   5  -1   2  946.61   29.50
  -5   1  -2  889.61   28.00
  -5   1  -2  973.90   31.00
  -5   1  -2  921.31   29.60
  -5   1  -2  990.60   32.30
  -5   1  -2  902.71   29.00
  -5   1  -2  969.10   30.80
  -5   1  -2  904.61   28.40
   5   0   2    7.50    3.70
   5   0   2   -0.30    3.10
   5   0   2    0.90    3.30
   5   0   2   -4.10    3.20
   5   0   2   -4.90    3.50
   5   0   2   -1.60    3.00
   5   0   2   -2.10    2.80
  -5   0  -2   -4.30    3.20
  -5   0  -2   -1.00    3.00
  -5   0  -2   -1.90    2.40
  -5   0  -2   -0.70    2.90
  -5   0  -2   -4.00    3.70
  -5   0  -2   -0.90    3.00
   5   1   2  943.81   29.80
   5   1   2  914.41   28.70
   5   1   2  919.41   28.50
   5   1   2  925.21   29.20
   5   1   2  933.51   27.10
   5   1   2  932.91   27.80
  -5  -1  -2  923.21   29.40
  -5  -1  -2  930.61   27.80
  -5  -1  -2  958.10   29.20
  -5  -1  -2  885.71   27.60
   5   2   2  267.27   11.30
   5   2   2  265.07   10.80
   5   2   2  251.77   10.30
   5   2   2  262.47    8.80
   5   2   2  263.97    9.20
   5   2   2  242.28   11.50
  -5  -2  -2  255.17    9.20
  -5  -2  -2  237.38   11.00
  -5  -2  -2  248.78   11.30
   5   3   2   45.20    5.70
   5   3   2   43.50    5.70
   5   3   2   43.90    5.10
   5   3   2   43.50    3.70
   5   3   2   42.50    3.50
   5   3   2   60.99    6.10
  -5  -3  -2   36.50    4.90
  -5  -3  -2   43.30    5.60
   5   4   2  236.18   11.20
   5   4   2  248.48   11.80
   5   4   2  261.27   11.40
   5   4   2  240.68   11.60
  -5  -4  -2  246.58   12.10
  -5  -4  -2  230.28   10.80
  -5  -4  -2  242.08   11.70
   5   5   2  560.94   19.70
   5   5   2  558.64   21.20
   5   5   2  569.14   21.10
   5   5   2  547.65   20.80
  -5  -5  -2  549.25   21.10
  -5  -5  -2  567.24   21.30
  -5  -5  -2  555.04   19.30
   5   6   2  109.69   10.30
  -5  -6  -2   98.99    7.40
  -5  -6  -2   80.69   10.20
  -5  -6  -2   96.69   10.40
   5   7   2   10.80    6.10
  -5  -7  -2    5.10    3.60
  -5  -7  -2    9.70    6.20
  -5  -7  -2    9.00    6.10
   5   8   2   -4.00    5.70
  -5  -8  -2    4.70    6.40
  -5  -8  -2   -4.00    5.70
   5   9   2  227.28   17.70
   5   9   2  264.37   18.40
  -5  -9  -2  225.68   16.50
  -5  -9  -2  253.07   16.90
   5  10   2   71.39   11.60
  -5 -10  -2  119.39   14.30
  -5 -10  -2   57.59   10.40
   5  11   2  183.68   19.30
  -5 -11  -2  173.38   17.10
  -5 -11  -2  203.98   17.50
   6 -11   2   -1.00   10.10
   6 -10   2    8.80    9.50
  -6  10  -2    4.80    8.80
   6  -9   2    3.30    5.00
   6  -9   2   10.20    9.10
   6  -9   2   23.90    9.50
  -6   9  -2   20.60    9.20
   6  -8   2  437.36   18.90
   6  -8   2  434.96   24.30
   6  -8   2  426.66   20.90
   6  -8   2  424.46   25.20
  -6   8  -2  398.26   23.80
  -6   8  -2  412.46   23.60
   6  -7   2   64.19   10.20
   6  -7   2   87.19    9.90
   6  -7   2  106.59   14.90
   6  -7   2   81.09   11.70
  -6   7  -2   68.39   11.70
  -6   7  -2   88.39   12.30
  -6   7  -2   66.99    8.60
  -6   7  -2   59.79   10.10
  -6   7  -2   66.29    9.70
  -6   7  -2   68.09    9.70
  -6   7  -2   82.79   11.40
   6  -6   2  127.39   11.10
   6  -6   2  125.49   14.50
   6  -6   2  136.19   12.10
   6  -6   2  108.79   11.70
   6  -6   2  119.19   13.30
  -6   6  -2  111.39   14.30
  -6   6  -2  117.99   13.60
  -6   6  -2   96.29   13.90
  -6   6  -2  106.39   13.60
  -6   6  -2  113.29   12.40
  -6   6  -2   89.59   13.10
   6  -5   2  401.46   16.60
   6  -5   2  409.66   19.20
   6  -5   2  416.46   18.40
   6  -5   2  407.56   21.30
   6  -5   2  382.66   19.80
   6  -5   2  374.26   17.70
  -6   5  -2  405.36   20.30
  -6   5  -2  426.46   21.10
  -6   5  -2  398.36   19.30
  -6   5  -2  402.86   19.50
  -6   5  -2  418.46   18.60
  -6   5  -2  411.96   21.20
   6  -4   2  124.79    9.20
   6  -4   2  128.69   11.90
   6  -4   2  113.29   10.40
   6  -4   2  126.79   10.00
   6  -4   2  116.79    9.70
   6  -4   2  118.99    9.50
   6  -4   2  113.09   11.00
  -6   4  -2  112.19   11.30
  -6   4  -2  113.79   10.60
  -6   4  -2  130.09   12.20
  -6   4  -2  119.39   10.00
  -6   4  -2  115.19   12.00
  -6   4  -2  123.09   11.30
   6  -3   2 2389.46   69.39
   6  -3   2 2463.05   69.39
   6  -3   2 2356.06   71.09
   6  -3   2 2440.06   70.69
   6  -3   2 1985.50   70.49
   6  -3   2 2542.85   72.49
  -6   3  -2 2537.85   72.39
  -6   3  -2 2397.66   70.89
  -6   3  -2 2362.96   72.69
  -6   3  -2 2487.15   72.19
  -6   3  -2 2483.05   69.69
  -6   3  -2 2419.46   70.09
   6  -2   2  277.87   12.50
   6  -2   2  275.37   12.70
   6  -2   2  277.17   14.30
   6  -2   2  260.97   12.00
   6  -2   2  257.17   12.90
   6  -2   2  276.97   13.50
   6  -2   2  263.27   13.80
  -6   2  -2  272.07   13.50
  -6   2  -2  246.48   14.40
  -6   2  -2  283.37   12.70
   6  -1   2  226.98   12.30
   6  -1   2  225.58   11.70
   6  -1   2  257.17   11.60
   6  -1   2  248.88   12.60
   6  -1   2  226.18   10.50
   6  -1   2  233.18   11.20
   6  -1   2  213.58   12.00
  -6   1  -2  222.78   10.20
  -6   1  -2  229.98   12.80
  -6   1  -2  250.37   13.20
  -6   1  -2  229.38   11.10
  -6   1  -2  228.68   11.60
  -6   1  -2  212.88   10.80
   6   0   2  259.97   11.10
   6   0   2  282.77   12.50
   6   0   2  286.77   13.10
   6   0   2  276.97   12.30
   6   0   2  266.97   11.90
   6   0   2  286.77   13.40
   6   0   2  261.37   12.70
  -6   0  -2  264.47   11.10
  -6   0  -2  261.87   11.90
  -6   0  -2  291.77   13.40
  -6   0  -2  278.07   10.20
  -6   0  -2  274.17   11.90
   6   1   2  237.28    9.60
   6   1   2  218.58   11.40
   6   1   2  246.28   11.10
   6   1   2  250.17   10.50
   6   1   2  221.88   11.10
   6   1   2  220.48   10.60
  -6  -1  -2  219.78   11.30
  -6  -1  -2  221.68    9.90
  -6  -1  -2  218.78    9.90
   6   2   2  268.87   11.80
   6   2   2  266.97   11.40
   6   2   2  277.97   10.00
   6   2   2  264.47   12.00
   6   2   2  258.87   12.50
   6   2   2  259.37   10.40
  -6  -2  -2  255.87   10.10
  -6  -2  -2  268.57   10.10
  -6  -2  -2  259.67   12.20
   6   3   2 2454.85   66.59
   6   3   2 2350.46   68.79
   6   3   2 2402.06   69.49
   6   3   2 2415.56   68.49
   6   3   2 2352.66   69.49
  -6  -3  -2 2372.26   65.99
  -6  -3  -2 2392.06   69.29
  -6  -3  -2 2383.16   66.19
   6   4   2  124.09    9.10
   6   4   2  120.99    8.30
   6   4   2  107.89    8.60
   6   4   2  117.59    8.90
  -6  -4  -2  129.09    9.70
   6   5   2  407.36   16.80
   6   5   2  383.96   16.20
   6   5   2  403.96   17.20
   6   5   2  390.46   17.30
  -6  -5  -2  396.16   17.50
  -6  -5  -2  395.86   17.40
   6   6   2  115.89    9.40
   6   6   2  111.79   10.90
   6   6   2  117.49   10.30
  -6  -6  -2   91.49   10.80
  -6  -6  -2  108.29   11.30
   6   7   2   85.49   11.50
   6   7   2   73.09   10.40
  -6  -7  -2   77.29   11.30
  -6  -7  -2   84.29   11.50
   6   8   2  423.36   21.20
   6   8   2  391.76   20.30
  -6  -8  -2  420.46   20.60
  -6  -8  -2  394.76   20.30
   6   9   2   17.40    7.40
   6   9   2   -1.70    6.90
  -6  -9  -2   16.40    7.20
  -6  -9  -2   18.50    7.90
   6  10   2   -1.60    7.80
  -6 -10  -2   -1.30    7.40
  -6 -10  -2   11.70    7.80
   6  11   2   22.20    9.50
  -6 -11  -2   19.60    9.30
  -6 -11  -2    7.10    8.00
   7 -11   2  138.39   17.70
   7 -10   2  158.28   19.50
   7  -9   2  116.99   17.80
   7  -9   2  136.69   11.40
   7  -9   2   86.19   13.10
  -7   9  -2   92.09   13.70
   7  -8   2   66.49   12.70
   7  -8   2   79.59   11.30
   7  -8   2   85.59   10.60
   7  -8   2   77.49   11.90
  -7   8  -2   71.19   11.60
   7  -7   2  106.39   12.20
   7  -7   2  105.59   14.30
   7  -7   2   98.49   11.30
   7  -7   2  107.49   15.40
  -7   7  -2  122.09   16.20
  -7   7  -2   94.19   12.00
  -7   7  -2  122.89   15.50
  -7   7  -2  103.79   14.40
  -7   7  -2  115.79   13.70
  -7   7  -2   77.49   11.30
   7  -6   2    6.20    5.30
   7  -6   2    1.50    6.90
   7  -6   2    4.00    5.70
   7  -6   2   -0.40    5.30
   7  -6   2    7.70    5.10
   7  -6   2   -4.00    6.90
  -7   6  -2   -8.80    7.50
  -7   6  -2   12.80    7.70
  -7   6  -2    1.10    6.90
  -7   6  -2   13.70    7.30
  -7   6  -2    3.40    7.00
  -7   6  -2    8.00    6.90
   7  -5   2   20.80    5.80
   7  -5   2   26.40    6.40
   7  -5   2   34.70    8.60
   7  -5   2   25.30    7.30
   7  -5   2   29.60    6.40
   7  -5   2   25.90    6.70
  -7   5  -2   32.20    8.00
  -7   5  -2   31.60    8.10
  -7   5  -2   25.90    6.50
  -7   5  -2   27.40    6.60
  -7   5  -2   28.50    7.10
  -7   5  -2   17.90    7.90
   7  -4   2  376.46   18.60
   7  -4   2  429.76   17.30
   7  -4   2  419.16   19.40
   7  -4   2  403.66   19.90
   7  -4   2  440.26   18.80
   7  -4   2  457.35   21.70
   7  -4   2  425.96   17.60
  -7   4  -2  442.86   18.30
  -7   4  -2  417.86   21.10
  -7   4  -2  435.56   20.30
  -7   4  -2  419.66   19.20
  -7   4  -2  378.36   18.80
  -7   4  -2  436.06   20.80
   7  -3   2  114.39   10.20
   7  -3   2  107.39    9.10
   7  -3   2   98.59   10.40
   7  -3   2   99.59    8.70
   7  -3   2   94.79    9.20
  -7   3  -2  120.79   12.20
  -7   3  -2   98.89    9.70
  -7   3  -2  118.99    9.50
  -7   3  -2  101.79   10.30
  -7   3  -2  121.59   11.20
  -7   3  -2  104.09   10.80
   7  -2   2    5.50    4.30
   7  -2   2    5.40    4.00
   7  -2   2    2.90    3.80
   7  -2   2    2.70    4.10
   7  -2   2   -2.90    3.90
   7  -2   2   -1.40    3.70
   7  -2   2   -2.50    3.90
  -7   2  -2    0.20    4.40
  -7   2  -2    0.40    1.70
  -7   2  -2    5.20    4.10
  -7   2  -2   -5.60    5.30
  -7   2  -2    3.10    1.80
  -7   2  -2    1.30    3.60
   7  -1   2   19.90    4.40
   7  -1   2   26.30    4.90
   7  -1   2   13.30    4.30
   7  -1   2   21.40    5.50
   7  -1   2   17.80    5.20
   7  -1   2   16.60    4.90
   7  -1   2   27.80    4.70
  -7   1  -2   17.50    4.40
  -7   1  -2   17.40    4.30
  -7   1  -2   15.70    5.20
  -7   1  -2   21.30    4.70
  -7   1  -2   19.40    4.00
  -7   1  -2   21.50    5.90
   7   0   2   -1.90    3.50
   7   0   2    3.90    3.30
   7   0   2    2.00    3.10
   7   0   2    2.00    3.80
   7   0   2   -4.40    3.90
   7   0   2   -2.70    3.30
   7   0   2   -4.80    3.30
  -7   0  -2   -0.40    4.20
  -7   0  -2   -1.30    3.20
  -7   0  -2   -4.10    3.20
  -7   0  -2   -1.10    3.70
  -7   0  -2    1.30    2.70
   7   1   2   21.80    5.10
   7   1   2   26.10    4.60
   7   1   2   24.10    4.00
   7   1   2   19.60    4.20
   7   1   2   33.90    4.80
   7   1   2   20.40    5.00
  -7  -1  -2   18.50    3.80
  -7  -1  -2   18.70    4.90
  -7  -1  -2   19.70    3.70
   7   2   2    6.40    3.80
   7   2   2    6.10    3.10
   7   2   2    4.10    3.30
   7   2   2    4.90    3.50
   7   2   2   -0.60    3.90
   7   2   2   -1.20    3.50
  -7  -2  -2    5.30    2.90
  -7  -2  -2    0.80    4.10
  -7  -2  -2    3.10    2.80
   7   3   2  101.99    8.50
   7   3   2  116.09    9.10
   7   3   2   95.09    6.60
   7   3   2  104.89    8.00
   7   3   2  105.29    8.70
  -7  -3  -2  100.59    5.90
  -7  -3  -2   99.99    6.00
  -7  -3  -2  116.89    9.50
   7   4   2  420.06   17.60
   7   4   2  415.36   16.80
   7   4   2  411.46   17.50
   7   4   2  424.46   17.40
  -7  -4  -2  414.46   17.80
   7   5   2   27.00    5.40
   7   5   2   30.20    6.50
   7   5   2   31.70    6.20
   7   5   2   27.30    6.10
  -7  -5  -2   25.50    6.20
  -7  -5  -2   39.70    6.90
   7   6   2    5.50    5.20
   7   6   2    2.00    5.00
   7   6   2    4.20    4.60
  -7  -6  -2    3.30    5.40
  -7  -6  -2   -0.70    5.90
   7   7   2  111.79   12.30
   7   7   2   89.99   11.00
  -7  -7  -2  105.29   12.40
  -7  -7  -2  123.29   12.40
   7   8   2   78.89   10.40
   7   8   2   81.09   10.40
  -7  -8  -2   86.19   11.80
  -7  -8  -2   91.19   12.50
   7   9   2   77.39   10.70
   7   9   2   92.99   13.80
  -7  -9  -2   91.99   13.70
  -7  -9  -2  111.19   13.60
   7  10   2  140.59   16.60
  -7 -10  -2  125.69   15.00
  -7 -10  -2  127.69   14.90
   7  11   2  102.19   15.10
  -7 -11  -2   98.89   15.10
  -7 -11  -2  114.39   15.70
   8 -11   2   40.40   13.40
   8 -10   2   11.30   10.10
   8  -9   2  185.68   13.90
   8  -9   2  158.98   19.80
   8  -9   2  198.98   20.30
  -8   9  -2  202.68   19.80
   8  -8   2  161.08   18.30
   8  -8   2  168.88   13.60
   8  -8   2  165.28   17.10
  -8   8  -2  186.58   17.80
   8  -7   2  355.56   18.20
   8  -7   2  319.07   22.40
   8  -7   2  327.77   18.90
   8  -7   2  328.27   21.10
  -8   7  -2  287.27   20.10
  -8   7  -2  306.27   20.80
  -8   7  -2  317.97   21.40
  -8   7  -2  300.37   22.20
  -8   7  -2  298.27   20.80
  -8   7  -2  314.47   19.00
   8  -6   2  135.59   13.00
   8  -6   2  157.68   13.60
   8  -6   2  146.99   11.40
   8  -6   2  145.49   16.50
   8  -6   2  159.28   15.30
   8  -6   2  143.09   13.00
  -8   6  -2  143.89   16.40
  -8   6  -2  141.99   16.20
  -8   6  -2  162.28   17.00
  -8   6  -2  103.19   13.90
  -8   6  -2  139.19   15.80
  -8   6  -2  162.98   14.40
   8  -5   2   18.80    6.10
   8  -5   2   10.10    6.50
   8  -5   2    4.80    5.50
   8  -5   2   16.20    6.60
   8  -5   2   14.00    6.50
   8  -5   2   14.60    7.20
  -8   5  -2    5.30    6.20
  -8   5  -2   19.50    8.10
  -8   5  -2    5.00    7.40
  -8   5  -2   14.90    7.60
  -8   5  -2    3.60    7.50
  -8   5  -2    2.10    5.90
   8  -4   2  323.87   17.20
   8  -4   2  329.27   18.10
   8  -4   2  308.67   18.20
   8  -4   2  309.97   17.00
   8  -4   2  328.07   16.50
   8  -4   2  296.27   15.50
   8  -4   2  344.17   15.30
  -8   4  -2  325.97   16.10
  -8   4  -2  284.97   17.00
  -8   4  -2  278.27   18.30
  -8   4  -2  332.07   18.50
  -8   4  -2  303.27   16.80
  -8   4  -2  296.47   18.00
   8  -3   2   21.40    6.40
   8  -3   2   19.00    6.50
   8  -3   2   22.70    6.50
   8  -3   2   29.50    5.70
   8  -3   2   22.10    5.20
   8  -3   2   22.50    5.40
  -8   3  -2   18.10    5.70
  -8   3  -2   13.40    5.80
  -8   3  -2   20.00    6.70
  -8   3  -2   19.50    7.00
  -8   3  -2   15.90    6.40
   8  -2   2 1158.58   36.80
   8  -2   2 1057.19   38.10
   8  -2   2 1131.19   39.20
   8  -2   2 1133.09   36.20
   8  -2   2 1184.28   39.60
   8  -2   2 1139.49   38.30
   8  -2   2 1137.79   37.70
  -8   2  -2 1134.19   36.60
  -8   2  -2 1102.09   37.00
  -8   2  -2 1188.28   40.10
  -8   2  -2 1200.58   38.30
  -8   2  -2 1160.58   36.00
   8  -1   2  217.88   13.60
   8  -1   2  228.58   12.70
   8  -1   2  261.57   14.30
   8  -1   2  257.27   13.60
   8  -1   2  220.98   13.90
   8  -1   2  250.77   12.10
   8  -1   2  250.97   12.90
  -8   1  -2  231.68   11.30
  -8   1  -2  235.38   12.90
  -8   1  -2  230.78   12.00
  -8   1  -2  256.47   13.00
  -8   1  -2  250.47   15.00
  -8   1  -2  245.08   14.60
   8   0   2   97.19    7.80
   8   0   2   90.29    8.50
   8   0   2   98.49    9.40
   8   0   2   79.59    8.90
   8   0   2  106.39    9.20
   8   0   2   82.09    8.90
   8   0   2   97.39    8.80
  -8   0  -2   90.89    8.30
  -8   0  -2   93.79    9.90
  -8   0  -2   85.49    6.60
  -8   0  -2  101.89    8.40
  -8   0  -2   93.09    8.20
   8   1   2  251.87   13.10
   8   1   2  248.08   11.40
   8   1   2  283.97   14.50
   8   1   2  266.57   12.60
   8   1   2  246.28   13.10
   8   1   2  236.88   12.70
  -8  -1  -2  242.48    8.30
  -8  -1  -2  244.28    8.50
  -8  -1  -2  237.68   11.70
  -8  -1  -2  247.68   11.80
  -8  -1  -2  247.08   13.40
   8   2   2 1200.08   38.20
   8   2   2 1166.78   35.70
   8   2   2 1090.39   36.00
   8   2   2 1076.29   36.80
   8   2   2 1174.78   36.80
   8   2   2 1155.18   34.50
  -8  -2  -2 1103.39   34.50
  -8  -2  -2 1089.29   34.30
  -8  -2  -2 1141.49   37.00
   8   3   2   22.40    4.30
   8   3   2   25.80    5.80
   8   3   2   13.50    4.20
   8   3   2   29.80    6.00
   8   3   2   22.40    5.30
  -8  -3  -2   13.40    3.30
  -8  -3  -2   16.70    3.30
  -8  -3  -2   19.50    5.80
   8   4   2  310.57   15.40
   8   4   2  299.27   15.60
   8   4   2  292.47   14.90
   8   4   2  285.87   14.30
  -8  -4  -2  326.07   10.70
  -8  -4  -2  300.67   15.70
   8   5   2    9.50    5.10
   8   5   2   10.20    5.60
   8   5   2   14.80    5.70
  -8  -5  -2   11.70    6.30
   8   6   2  141.09   12.80
   8   6   2  149.88   11.80
   8   6   2  152.28   11.90
  -8  -6  -2  156.28   13.70
  -8  -6  -2  153.98   13.00
   8   7   2  294.97   17.80
   8   7   2  297.57   17.10
  -8  -7  -2  310.47   17.80
  -8  -7  -2  312.27   18.00
   8   8   2  179.18   14.50
   8   8   2  155.98   14.70
  -8  -8  -2  146.19   14.50
  -8  -8  -2  177.38   14.90
   8   9   2  182.98   16.00
   8   9   2  171.88   16.70
  -8  -9  -2  155.58   15.80
  -8  -9  -2  180.58   16.10
   8  10   2   18.90    8.70
  -8 -10  -2    6.30    7.70
  -8 -10  -2    8.70    8.60
   8  11   2   36.50   11.10
  -8 -11  -2   29.60    9.90
  -8 -11  -2   39.10   10.10
   9 -10   2   45.20   13.30
   9  -9   2   37.70   10.80
   9  -9   2   23.20    7.70
   9  -8   2  102.59   12.40
   9  -8   2  104.49   14.40
   9  -8   2  109.79   15.60
  -9   8  -2  100.69   15.30
   9  -7   2   82.49   10.70
   9  -7   2   60.79    9.50
   9  -7   2   87.09   13.80
   9  -7   2   53.39   10.80
  -9   7  -2   62.69   11.00
  -9   7  -2   65.29   11.80
  -9   7  -2   68.99   11.60
  -9   7  -2   55.79   12.30
  -9   7  -2   80.19   12.30
   9  -6   2   68.79   10.50
   9  -6   2  101.69   12.60
   9  -6   2   78.39   10.90
   9  -6   2   77.19    9.80
   9  -6   2   80.59   11.90
   9  -6   2   91.39   13.40
  -9   6  -2   91.29   11.20
  -9   6  -2   83.29   11.60
  -9   6  -2   93.89   12.70
  -9   6  -2   76.89   12.10
  -9   6  -2   65.49   11.20
  -9   6  -2   84.29   12.50
   9  -5   2    9.20    7.20
   9  -5   2   -0.90    6.50
   9  -5   2   -5.30    5.80
   9  -5   2    9.70    6.10
   9  -5   2   -0.80    5.70
   9  -5   2   -6.80    5.80
  -9   5  -2   -1.80    6.30
  -9   5  -2    2.60    7.20
  -9   5  -2    3.40    7.80
  -9   5  -2   11.60    7.20
  -9   5  -2    0.10    6.60
  -9   5  -2    8.90    6.60
   9  -4   2   20.10    7.30
   9  -4   2    0.30    5.10
   9  -4   2    6.80    6.00
   9  -4   2   10.20    5.80
   9  -4   2    1.80    6.30
  -9   4  -2    9.20    7.10
  -9   4  -2    8.70    7.10
  -9   4  -2    8.30    7.20
  -9   4  -2    1.80    6.80
  -9   4  -2    8.60    6.10
  -9   4  -2    3.20    6.30
   9  -3   2  110.99   10.20
   9  -3   2   96.99    9.80
   9  -3   2  121.99   10.70
   9  -3   2  108.49   11.90
   9  -3   2   98.29   11.20
   9  -3   2  117.89   12.30
  -9   3  -2   68.59    8.90
  -9   3  -2   94.59   11.30
  -9   3  -2   99.79   11.50
  -9   3  -2   95.39   13.10
  -9   3  -2   89.99   12.50
   9  -2   2 1400.06   44.00
   9  -2   2 1373.46   46.20
   9  -2   2 1393.26   45.10
   9  -2   2 1382.76   46.70
   9  -2   2 1320.17   45.30
   9  -2   2 1446.26   47.00
   9  -2   2 1429.56   43.50
  -9   2  -2 1367.86   42.70
  -9   2  -2 1348.77   44.40
  -9   2  -2 1403.06   47.20
  -9   2  -2 1369.26   45.10
  -9   2  -2 1393.26   43.60
   9  -1   2   54.09    8.40
   9  -1   2   61.69    7.80
   9  -1   2   55.79    8.10
   9  -1   2   64.99    9.40
   9  -1   2   59.89    8.10
   9  -1   2   45.10    6.80
   9  -1   2   73.79    8.20
  -9   1  -2   60.89    8.80
  -9   1  -2   70.09    8.90
  -9   1  -2   62.39    9.10
  -9   1  -2   44.00    5.80
  -9   1  -2   44.70    6.50
   9   0   2   -4.20    4.30
   9   0   2   -6.20    4.70
   9   0   2   -2.70    4.50
   9   0   2   -2.10    4.40
   9   0   2   -0.80    4.40
   9   0   2    3.60    4.10
   9   0   2   -3.80    3.70
  -9   0  -2    1.10    3.30
  -9   0  -2   -4.70    4.90
  -9   0  -2   -6.20    3.70
  -9   0  -2    0.90    4.60
  -9   0  -2   -7.30    3.50
   9   1   2   63.19    8.60
   9   1   2   60.99    8.80
   9   1   2   78.89    8.70
   9   1   2   45.30    6.40
   9   1   2   59.99    8.60
   9   1   2   62.09    8.10
   9   1   2   57.69    7.20
  -9  -1  -2   51.89    4.60
  -9  -1  -2   49.60    5.00
  -9  -1  -2   54.19    7.30
  -9  -1  -2   59.89    7.70
  -9  -1  -2   53.19    7.40
   9   2   2 1368.36   43.80
   9   2   2 1378.66   44.70
   9   2   2 1422.56   44.40
   9   2   2 1407.76   45.70
   9   2   2 1395.36   43.50
   9   2   2 1416.46   42.10
  -9  -2  -2 1362.26   41.90
  -9  -2  -2 1350.56   41.80
  -9  -2  -2 1360.86   44.50
   9   3   2   97.89   10.00
   9   3   2  106.19   10.20
   9   3   2  100.29   11.00
   9   3   2   98.29    9.10
  -9  -3  -2   97.99   10.80
  -9  -3  -2   96.49    7.30
   9   4   2    3.90    4.10
   9   4   2    5.80    5.10
   9   4   2    2.10    5.60
   9   4   2    3.20    5.10
  -9  -4  -2    5.70    6.10
  -9  -4  -2    4.70    3.00
   9   5   2    0.70    5.60
   9   5   2    6.40    5.60
   9   5   2   -1.30    4.50
  -9  -5  -2    2.40    6.10
   9   6   2   87.09   10.70
   9   6   2   78.59   10.90
   9   6   2   77.39    9.90
  -9  -6  -2   85.29   12.40
  -9  -6  -2   79.89   11.80
   9   7   2   76.79   10.80
[truncated: 24,035,619 more chars]
